# Supplementary material for: Expression Profiles of Microsatellites in Fruit Tissues of Akebia trifoliata and Development of Efficient EST-SSR Markers
Source: MDPI journal article supplement (doi:10.3390/genes13081451), 2022-08-15
Supplement: s1 [file s1]

## Supplementary Figures

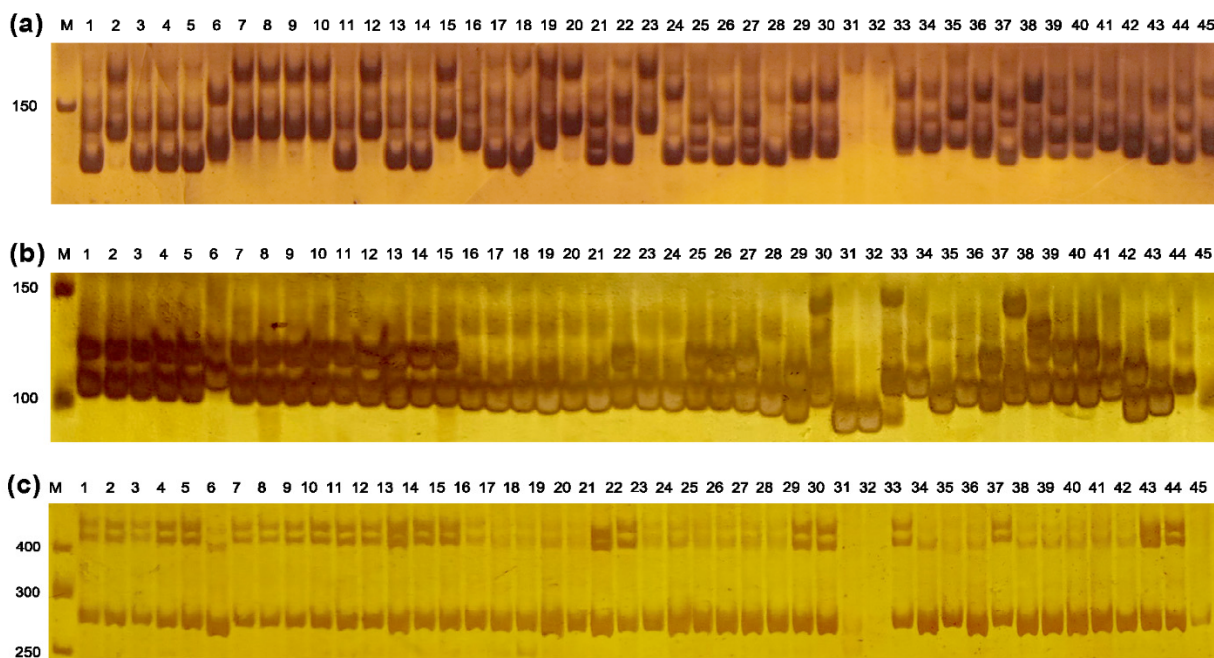

**Figure S1.** EST-SSR marker amplification results were separated by non-denaturing polyacrylamide gel. (a) Amplification results of markers EST-SSR-8, (b) Amplification results of markers EST-SSR-75, (c) Amplification results of markers EST-SSR-93
