# Supplementary material for: Expression Profiles of Microsatellites in Fruit Tissues of Akebia trifoliata and Development of Efficient EST-SSR Markers
Source: Genes (Basel). 2022 Aug 15;13(8):1451. doi: 10.3390/genes13081451 (PMC9408125; doi:10.3390/genes13081451)
Supplement: Supplementary file 1 [file genes-13-01451-s001.zip › supplementary tables.xlsx]

## Sheet: Table S1
Table S1. The number and proportion of various types of SSR motifs in the fruit tissues of A. trifoliata
SSR motif	FT-1	Quantity ratio	FT-2	Quantity ratio	FT-3	Quantity ratio	FT-4	Quantity ratio	Sum (FT)	ST-1	Quantity ratio	ST-2	Quantity ratio	ST-3	Quantity ratio	ST-4	Quantity ratio	Sum (ST)	RT-1	Quantity ratio	RT-2	Quantity ratio	RT-3	Quantity ratio	RT-4	Quantity ratio	Sum (FT)	All tissues	Quantity ratio (sum)	Quantity ratio (Within the same nucleotide repeating unit)
A/T	27363	0.955913	25312	0.955242	23725	0.957271	25424	0.953817	101824	27558	0.956642	26639	0.956139	26325	0.959506	31172	0.956666	111694	27875	0.954525	32862	0.951832	30880	0.9566	29710	0.954661	121327	334845	0.579437	0.955662
C/G	1262	0.0440873	1186	0.0447581	1059	0.0427292	1231	0.0461827	4738	1249	0.0433575	1222	0.0438606	1111	0.0404942	1412	0.0433342	4994	1328	0.0454748	1663	0.048168	1401	0.0434001	1411	0.0453392	5803	15535	0.0268827	0.0443376
Single-nucleotide repeats (SNR)	28625		26498		24784		26655		106562	28807		27861		27436		32584		116688	29203		34525		32281		31121		127130	350380	0.60632
AG/CT	8505	0.642226	8226	0.653947	7894	0.654723	7664	0.642522	32289	8797	0.646505	9041	0.662587	9403	0.672652	9573	0.632257	36814	8546	0.632475	9580	0.618983	9298	0.625749	8757	0.623052	36181	105284	0.18219	0.641655
AT/AT	2834	0.214	2568	0.20415	2441	0.202455	2556	0.214286	10399	2867	0.2107	2730	0.200073	2695	0.192789	3375	0.222905	11667	2988	0.221137	3577	0.231117	3376	0.227202	3264	0.232231	13205	35271	0.0610352	0.21496
AC/GT	1888	0.142566	1767	0.140472	1712	0.141992	1695	0.142103	7062	1928	0.141692	1852	0.135727	1863	0.133271	2179	0.143914	7822	1957	0.144834	2298	0.148478	2142	0.144155	2021	0.143792	8418	23302	0.0403233	0.142014
CG/CG	16	0.00120819	18	0.00143096	10	0.000829394	13	0.00108987	57	15	0.00110237	22	0.00161231	18	0.00128765	14	0.000924642	69	21	0.00155417	22	0.00142146	43	0.00289387	13	0.000924938	99	225	0.000389354	0.00137127
Di-nucleotide repeats (DNR)	13243		12579		12057		11928		49807	13607		13645		13979		15141		56372	13512		15477		14859		14055		57903	164082	0.283938
AAG/CTT	1166	0.256376	1152	0.270931	1096	0.263906	1058	0.262466	4472	1199	0.263748	1241	0.26815	1284	0.272785	1256	0.253943	4980	1227	0.260953	1375	0.257732	1318	0.243308	1202	0.254877	5122	14574	0.0252198	0.260338
AAT/ATT	1031	0.226693	883	0.207667	873	0.210209	931	0.23096	3718	991	0.217994	976	0.21089	972	0.206501	1164	0.235342	4103	1072	0.227988	1273	0.238613	1174	0.216725	1119	0.237277	4638	12459	0.0215598	0.222558
ATC/ATG	702	0.154354	661	0.155456	657	0.158199	625	0.155048	2645	681	0.149802	704	0.152118	684	0.145315	780	0.157703	2849	723	0.153764	825	0.154639	798	0.147314	717	0.152036	3063	8557	0.0148076	0.152855
AAC/GTT	561	0.123351	522	0.114776	540	0.118734	481	0.105761	2104	586	0.128848	581	0.127748	601	0.132146	612	0.134565	2380	575	0.126429	658	0.144679	639	0.140501	587	0.129068	2459	6943	0.0120146	0.124024
ACC/GGT	521	0.114556	486	0.10686	472	0.103782	447	0.098285	1926	545	0.119833	558	0.122691	571	0.12555	563	0.123791	2237	504	0.110818	614	0.135004	627	0.137863	533	0.117194	2278	6441	0.0111459	0.115057
AGG/CCT	221	0.0485928	197	0.0433157	167	0.0367194	175	0.0384785	760	212	0.0466139	215	0.0472735	211	0.046394	209	0.0459543	847	215	0.0472735	219	0.048153	321	0.0705805	205	0.0450748	960	2567	0.0044421	0.0458548
AGC/CTG	171	0.0375989	167	0.0367194	151	0.0332014	150	0.0329815	639	166	0.0364996	173	0.0380387	191	0.0419965	174	0.0382586	704	185	0.0406772	166	0.0364996	273	0.0600264	170	0.0373791	794	2137	0.003698	0.0381737
ACT/AGT	124	0.0272647	127	0.0279244	131	0.0288039	123	0.0270449	505	116	0.0255057	128	0.0281442	129	0.0283641	141	0.0310026	514	140	0.0307828	140	0.0307828	131	0.0288039	133	0.0292436	544	1563	0.00270471	0.0279202
ACG/CGT	32	0.00703606	33	0.00725594	33	0.00725594	34	0.00747581	132	34	0.00747581	37	0.00813544	34	0.00747581	34	0.00747581	139	32	0.00703606	44	0.00967458	79	0.0173703	35	0.00769569	190	461	0.000797743	0.00823494
CCG/CGG	19	0.00417766	24	0.00527704	33	0.00725594	7	0.00153914	83	16	0.00351803	15	0.00329815	30	0.00659631	13	0.0028584	74	29	0.00637643	21	0.00461741	57	0.012533	15	0.00329815	122	279	0.000482799	0.00498383
Tri-nucleotide repeats (TNR)	4548		4252		4153		4031		16984	4546		4628		4707		4946		18827	4702		5335		5417		4716		20170	55981	0.0968731
AAAT/ATTT	205		163		160		185		713	224		211		197		227		859	225		256		237		206		924	2496	0.00431924
AAAG/CTTT	92		83		69		69		313	84		83		83		84		334	90		100		95		83		368	1015	0.00175642
AAAC/GTTT	40		31		39		34		144	37		39		28		40		144	36		47		37		35		155	443	0.000766595
AGAT/ATCT	34		35		26		29		124	36		36		35		35		142	32		40		31		33		136	402	0.000695646
ACAT/ATGT	33		36		28		36		133	46		30		37		43		156	30		42		37		35		144	433	0.000749291
AATC/ATTG	12		8		9		10		39	13		10		9		11		43	13		9		13		13		48	130	0.00022496
ACAG/CTGT	6		9		8		5		28	9		4		4		6		23	12		6		9		9		36	87	0.00015055
AAGG/CCTT	7		9		10		10		36	8		6		8		8		30	11		11		11		9		42	108	0.00018689
AATG/ATTC	6		9		5		7		27	5		7		8		5		25	11		9		4		9		33	85	0.000147089
ATCC/ATGG	7		5		9		5		26	7		8		7		11		33	10		11		11		8		40	99	0.000171316
AATT/AATT	8		9		12		10		39	12		8		13		8		41	9		11		18		8		46	126	0.000218038
ACCC/GGGT	3		4		5		7		19	6		5		4		8		23	8		8		3		9		28	70	0.000121132
AGGG/CCCT	10		0		12		11		33	7		11		10		12		40	8		10		14		11		43	116	0.000200734
ACTC/AGTG	5		6		9		5		25	6		1		6		6		19	7		6		5		3		21	65	0.00011248
ATCG/ATCG	7		8		6		12		33	7		5		5		7		24	7		7		8		7		29	86	0.00014882
AACC/GGTT	6		2		4		6		18	3		3		1		5		12	5		5		4		6		20	50	8.65232e-05
AACG/CGTT	2		3		1		2		8	3		2		2		2		9	3		4		2		2		11	28	4.8453e-05
AGCG/CGCT	4		2		2		2		10	2		1		3		1		7	3		1		6		1		11	28	4.8453e-05
AACT/AGTT	0		1		1		0		2	0		1		1		2		4	2		1		1		0		4	10	1.73046e-05
ACGC/CGTG	2		1		2		1		6	1		2		0		2		5	2		1		5		1		9	20	3.46093e-05
ACTG/AGTC	1		1		0		1		3	1		0		1		1		3	2		1		0		0		3	9	1.55742e-05
AAGC/CTTG	1		0		0		0		1	0		1		1		1		3	1		1		1		0		3	7	1.21132e-05
ACGG/CCGT	1		2		2		0		5	0		2		0		0		2	1		2		0		0		3	10	1.73046e-05
AGCC/CTGG	1		1		1		1		4	1		2		2		0		5	1		2		5		1		9	18	3.11483e-05
ACCT/AGGT	1		0		0		0		1	1		1		1		1		4	0		0		0		0		0	5	8.65232e-06
ACGT/ACGT	1		0		1		0		2	0		6		0		0		6	0		0		1		0		1	9	1.55742e-05
AGGC/CCTG	1		5		1		0		7	0		0		0		0		0	0		0		1		0		1	8	1.38437e-05
ATGC/ATGC	1		0		1		0		2	0		1		1		1		3	0		1		0		0		1	6	1.03828e-05
ACCG/CGGT	0		0		0		0		0	1		0		0		0		1	0		0		0		0		0	1	1.73046e-06
AGCT/AGCT	0		0		0		0		0	1		0		0		0		1	0		0		0		0		0	1	1.73046e-06
CCCG/CGGG	0		0		0		0		0	0		1		0		0		1	0		0		0		0		0	1	1.73046e-06
AAGT/ACTT	0		0		0		0		0	0		0		1		0		1	0		0		0		0		0	1	1.73046e-06
Tetra-nucleotide repeats(TeNR)	497		433		423		448		1801	521		487		468		527		2003	529		592		559		489		2169	5973	0.0103361
AAAAC/GTTTT	9		4		11		10		34	10		7		5		10		32	8		10		8		10		36	102	0.000176507
AAAAG/CTTTT	10		9		8		11		38	7		14		10		15		46	15		14		17		13		59	143	0.000247456
AAAAT/ATTTT	13		11		15		18		57	15		9		12		18		54	10		15		11		16		52	163	0.000282065
AAAGG/CCTTT	0		0		1		0		1	0		0		0		1		1	0		0		0		1		1	3	5.19139e-06
AAATT/AATTT	0		1		1		1		3	0		0		1		0		1	0		0		0		2		2	6	1.03828e-05
AACAC/GTGTT	0		1		1		1		3	1		1		1		2		5	1		1		3		3		8	16	2.76874e-05
AACAG/CTGTT	0		0		1		1		2	0		0		0		1		1	0		0		1		1		2	5	8.65232e-06
AACCC/GGGTT	1		0		1		0		2	1		0		0		1		2	0		1		0		0		1	5	8.65232e-06
AAGAG/CTCTT	4		2		5		5		16	7		9		6		8		30	9		6		13		5		33	79	0.000136707
AAGGG/CCCTT	2		1		1		6		10	4		3		4		2		13	3		2		3		6		14	37	6.40271e-05
AATAT/ATATT	3		1		0		2		6	3		3		0		2		8	2		1		1		1		5	19	3.28788e-05
ACACC/GGTGT	2		3		1		0		6	0		1		1		0		2	1		0		0		0		1	9	1.55742e-05
AATGG/ATTCC	0		1		3		0		4	0		0		0		0		0	2		0		0		1		3	7	1.21132e-05
AATTC/AATTG	0		0		0		0		0	0		0		0		0		0	0		0		0		1		1	1	1.73046e-06
ACATC/ATGTG	0		1		2		1		4	1		3		1		1		6	0		1		1		2		4	14	2.42265e-05
ACCCC/GGGGT	1		1		2		2		6	0		2		0		1		3	2		4		2		1		9	18	3.11483e-05
ACCTC/AGGTG	2		2		4		1		9	1		2		1		3		7	2		2		2		2		8	24	4.15311e-05
ACGAT/ATCGT	0		0		0		1		1	1		1		1		1		4	1		1		1		1		4	9	1.55742e-05
ACTCT/AGAGT	0		1		0		1		2	0		0		1		0		1	0		0		0		1		1	4	6.92185e-06
AGAGG/CCTCT	6		1		5		1		13	4		2		4		3		13	5		3		4		2		14	40	6.92185e-05
AGATC/ATCTG	1		1		1		1		4	1		0		0		1		2	1		1		1		1		4	10	1.73046e-05
AGATG/ATCTC	0		0		1		1		2	1		1		1		2		5	0		0		0		2		2	9	1.55742e-05
AGGCG/CCTCG	1		0		1		2		4	1		1		1		0		3	0		0		0		2		2	9	1.55742e-05
AGGGC/CCCTG	0		1		0		0		1	0		1		0		0		1	0		0		0		1		1	3	5.19139e-06
AGGGG/CCCCT	1		2		1		4		8	1		2		0		2		5	2		1		1		3		7	20	3.46093e-05
AAACC/GGTTT	0		0		0		0		0	0		0		1		2		3	1		0		2		0		3	6	1.03828e-05
ACCAG/CTGGT	0		0		0		0		0	0		0		1		0		1	1		1		0		0		2	3	5.19139e-06
AACCG/CGGTT	0		1		0		1		2	0		0		0		0		0	0		2		0		0		2	4	6.92185e-06
AATGC/ATTGC	0		0		0		0		0	0		1		0		0		1	0		1		0		0		1	2	3.46093e-06
ACTCG/AGTCG	0		0		0		0		0	0		0		0		0		0	0		1		2		0		3	3	5.19139e-06
CCCCG/CGGGG	0		0		1		0		1	0		0		0		0		0	0		1		0		0		1	2	3.46093e-06
AATCC/ATTGG	0		1		0		0		1	0		0		0		1		1	0		0		0		0		0	2	3.46093e-06
ACGCC/CGTGG	0		0		1		0		1	0		0		0		1		1	0		0		0		0		0	2	3.46093e-06
AAGTC/ACTTG	0		0		0		0		0	1		1		0		1		3	0		0		0		0		0	3	5.19139e-06
AAAGC/CTTTG	0		0		0		0		0	0		0		0		0		0	0		0		1		0		1	1	1.73046e-06
ACCGC/CGGTG	0		0		0		0		0	0		0		0		0		0	0		0		1		0		1	1	1.73046e-06
ACGAG/CGTCT	0		0		0		0		0	0		0		0		0		0	0		0		0		1		1	1	1.73046e-06
AGCCC/CTGGG	0		0		0		0		0	0		0		0		0		0	0		0		0		1		1	1	1.73046e-06
AAATG/ATTTC	0		0		1		0		1	0		0		0		0		0	0		0		0		0		0	1	1.73046e-06
AGGAT/ATCCT	0		0		1		0		1	0		0		0		0		0	0		0		0		0		0	1	1.73046e-06
AGGCC/CCTGG	0		0		1		0		1	0		0		0		0		0	0		0		0		0		0	1	1.73046e-06
AAATC/ATTTG	0		0		0		0		0	1		0		0		0		1	0		0		0		0		0	1	1.73046e-06
ACACG/CGTGT	0		0		0		0		0	0		1		0		0		1	0		0		0		0		0	1	1.73046e-06
ACATG/ATGTC	0		0		0		0		0	0		1		0		0		1	0		0		0		0		0	1	1.73046e-06
AACTC/AGTTG	0		0		0		0		0	0		0		2		0		2	0		0		0		0		0	2	3.46093e-06
ACCGG/CCGGT	0		0		0		0		0	0		0		0		1		1	0		0		0		0		0	1	1.73046e-06
Penta-nucleotide repeats(PNR)	56		46		71		71		244	61		66		54		80		261	66		69		75		80		290	795	0.00137572
AAAAAG/CTTTTT	5		6		5		4		20	4		5		4		7		20	10		4		6		8		28	68	0.000117671
AAAAAT/ATTTTT	6		3		1		4		14	3		2		1		7		13	5		2		5		1		13	40	6.92185e-05
AAAAGC/CTTTTG	1		1		2		1		5	1		1		1		1		4	2		1		1		1		5	14	2.42265e-05
AAAATG/ATTTTC	2		1		0		0		3	0		0		0		1		1	1		1		1		1		4	8	1.38437e-05
AAACCG/CGGTTT	1		1		1		2		5	1		1		1		1		4	2		1		2		1		6	15	2.59569e-05
AAAGAG/CTCTTT	1		1		2		2		6	3		2		2		1		8	3		2		2		3		10	24	4.15311e-05
AAATCG/ATTTCG	1		2		1		0		4	0		1		0		0		1	1		1		0		1		3	8	1.38437e-05
AAATGG/ATTTCC	1		1		1		1		4	1		1		1		1		4	2		1		1		1		5	13	2.2496e-05
AACACC/GGTGTT	1		1		0		0		2	1		1		0		0		2	1		2		2		1		6	10	1.73046e-05
AACCAG/CTGGTT	1		1		1		0		3	2		0		0		1		3	1		0		1		2		4	10	1.73046e-05
AACCCG/CGGGTT	0		0		0		0		0	0		0		0		0		0	1		0		1		0		2	2	3.46093e-06
AACCCT/AGGGTT	1		1		0		1		3	2		1		2		1		6	2		0		2		4		8	17	2.94179e-05
AACCTC/AGGTTG	2		1		2		1		6	0		1		0		1		2	1		0		0		0		1	9	1.55742e-05
AAGAGG/CCTCTT	2		2		1		1		6	2		0		2		2		6	2		3		2		3		10	22	3.80702e-05
AAGGTG/ACCTTC	1		0		0		0		1	0		3		2		2		7	1		1		1		1		4	12	2.07656e-05
ACACAG/CTGTGT	0		0		0		0		0	0		0		0		0		0	1		0		0		1		2	2	3.46093e-06
ACACCC/GGGTGT	1		0		2		2		5	2		0		2		0		4	4		2		0		2		8	17	2.94179e-05
ACACGC/CGTGTG	1		1		0		1		3	1		2		0		0		3	2		0		1		1		4	10	1.73046e-05
ACACTC/AGTGTG	0		0		0		1		1	1		1		1		2		5	1		1		1		1		4	10	1.73046e-05
ACCAGC/CTGGTG	2		2		0		2		6	3		0		1		3		7	2		2		2		3		9	22	3.80702e-05
ACCATC/ATGGTG	0		1		2		0		3	1		1		2		2		6	1		3		0		0		4	13	2.2496e-05
ACCCAT/ATGGGT	0		0		1		0		1	0		0		0		0		0	1		0		0		0		1	2	3.46093e-06
ACCTCC/AGGTGG	2		2		2		2		8	3		2		1		4		10	1		1		1		2		5	23	3.98007e-05
ACTCTC/AGAGTG	0		0		0		0		0	1		2		0		2		5	2		2		1		1		6	11	1.90351e-05
ACTCTG/AGAGTC	1		1		1		0		3	1		0		0		0		1	1		1		0		1		3	7	1.21132e-05
ACTGCT/AGCAGT	0		1		0		2		3	1		1		1		1		4	2		0		1		0		3	10	1.73046e-05
AGAGCG/CGCTCT	2		1		1		0		4	0		0		0		0		0	2		0		0		0		2	6	1.03828e-05
AGAGGG/CCCTCT	1		0		1		3		5	4		2		1		2		9	3		2		4		1		10	24	4.15311e-05
AGATGG/ATCTCC	1		4		1		3		9	3		3		0		2		8	1		2		2		1		6	23	3.98007e-05
AGCCGG/CCGGCT	0		1		0		0		1	0		0		0		0		0	1		2		1		1		5	6	1.03828e-05
AGCCTG/AGGCTC	1		1		1		2		5	2		0		0		3		5	1		0		0		0		1	11	1.90351e-05
AGCGGG/CCCGCT	0		1		0		0		1	0		0		0		0		0	1		1		2		0		4	5	8.65232e-06
AGGCCC/CCTGGG	1		1		1		1		4	2		1		2		0		5	1		0		0		0		1	10	1.73046e-05
AAGACG/CGTCTT	3		1		0		2		6	0		1		1		2		4	0		1		0		1		2	12	2.07656e-05
AAGATG/ATCTTC	2		0		2		0		4	2		1		1		2		6	0		1		1		2		4	14	2.42265e-05
AAGCAC/CTTGTG	0		2		2		1		5	0		1		2		0		3	0		1		2		0		3	11	1.90351e-05
ACAGAG/CTCTGT	1		1		1		1		4	2		3		1		1		7	0		1		0		0		1	12	2.07656e-05
ACTCCC/AGTGGG	2		0		0		0		2	1		1		0		1		3	0		1		1		0		2	7	1.21132e-05
ACTGGG/AGTCCC	1		0		0		0		1	0		0		0		0		0	0		1		0		1		2	3	5.19139e-06
AGCCGC/CGGCTG	1		1		0		1		3	1		1		0		1		3	0		1		1		1		3	9	1.55742e-05
ATCCCC/ATGGGG	0		0		0		1		1	0		1		0		0		1	0		1		0		1		2	4	6.92185e-06
AACAGC/CTGTTG	0		0		1		1		2	0		0		1		0		1	0		0		1		2		3	6	1.03828e-05
AAAAAC/GTTTTT	0		0		0		0		0	0		0		0		1		1	0		1		0		1		2	3	5.19139e-06
AAAACC/GGTTTT	0		0		1		0		1	0		0		0		0		0	0		0		0		1		1	2	3.46093e-06
AAATAG/ATTTCT	0		0		0		0		0	0		1		0		1		2	0		0		1		1		2	4	6.92185e-06
AACCCC/GGGGTT	2		2		0		1		5	1		1		2		1		5	0		1		2		1		4	14	2.42265e-05
AAGGAG/CCTTCT	0		0		0		1		1	1		0		1		2		4	0		0		1		1		2	7	1.21132e-05
AAGTAG/ACTTCT	1		0		0		1		2	1		0		0		0		1	0		0		1		1		2	5	8.65232e-06
ACACCG/CGGTGT	1		1		0		1		3	0		0		2		0		2	0		2		1		1		4	9	1.55742e-05
ACATCC/ATGTGG	1		0		0		0		1	1		0		0		0		1	0		0		0		1		1	3	5.19139e-06
ACCTGC/AGGTGC	0		0		0		0		0	0		0		0		1		1	0		0		0		1		1	2	3.46093e-06
ACAGCT/AGCTGT	1		1		1		1		4	0		1		0		1		2	0		0		2		0		2	8	1.38437e-05
ATCCGC/ATGCGG	0		0		0		0		0	2		0		2		0		4	0		0		0		1		1	5	8.65232e-06
AAAATT/AATTTT	0		0		0		0		0	0		0		1		0		1	0		0		0		0		0	1	1.73046e-06
AAACGG/CCGTTT	0		0		0		0		0	0		1		1		0		2	0		0		0		0		0	2	3.46093e-06
AACCAC/GGTTGT	0		1		2		1		4	0		0		1		0		1	0		1		0		0		1	6	1.03828e-05
AACTCC/AGTTGG	0		0		0		0		0	0		0		1		0		1	0		0		1		0		1	2	3.46093e-06
AAGCTG/AGCTTC	0		0		0		0		0	0		0		1		0		1	0		0		0		0		0	1	1.73046e-06
ACCCCC/GGGGGT	0		1		0		0		1	0		0		1		1		2	0		1		0		0		1	4	6.92185e-06
ATATCC/ATATGG	1		0		0		0		1	1		1		1		1		4	0		0		0		0		0	5	8.65232e-06
ACATCG/ATGTCG	0		0		0		0		0	0		0		0		1		1	0		0		0		0		0	1	1.73046e-06
AGCAGG/CCTGCT	0		2		0		0		2	0		0		0		1		1	0		0		0		0		0	3	5.19139e-06
CCCGCG/CGCGGG	0		0		0		0		0	0		0		0		1		1	0		0		0		0		0	1	1.73046e-06
AACCTG/AGGTTC	2		0		1		0		3	0		0		0		0		0	0		0		0		0		0	3	5.19139e-06
AACTCT/AGAGTT	0		0		1		0		1	0		0		0		0		0	0		0		0		0		0	1	1.73046e-06
ACGGAG/CCGTCT	0		0		1		1		2	0		0		0		0		0	0		0		0		0		0	2	3.46093e-06
ACCTCT/AGAGGT	0		1		0		0		1	0		0		0		0		0	0		0		0		0		0	1	1.73046e-06
AAAATC/ATTTTG	0		0		0		1		1	0		0		0		0		0	0		0		1		0		1	2	3.46093e-06
AGGGGG/CCCCCT	0		0		0		1		1	0		0		0		0		0	0		0		0		0		0	1	1.73046e-06
ACGAGC/CGTGCT	0		0		0		0		0	0		0		0		0		0	0		0		2		0		2	2	3.46093e-06
AAGCAG/CTGCTT	0		0		0		0		0	0		0		0		0		0	0		0		1		0		1	1	1.73046e-06
ACCACG/CGTGGT	0		0		0		0		0	0		0		0		0		0	0		0		1		0		1	1	1.73046e-06
ACGCAG/CGTCTG	0		0		0		0		0	0		0		0		0		0	0		0		1		0		1	1	1.73046e-06
ACGCCC/CGTGGG	0		0		0		0		0	0		0		0		0		0	0		0		1		0		1	1	1.73046e-06
AGCATC/ATGCTG	0		0		0		0		0	0		0		0		0		0	0		0		1		0		1	1	1.73046e-06
AGCGGC/CCGCTG	0		0		0		0		0	0		0		0		0		0	0		0		1		0		1	1	1.73046e-06
ATCGCC/ATGGCG	0		0		0		0		0	0		0		0		0		0	0		0		1		0		1	1	1.73046e-06
Hexa-nucleotide repeats(HNR)	58		53		43		52		206	58		48		47		66		219	63		52		68		61		244	669	0.00115768
Sum	47027		43861		41531		43185			47600		46735		46691		53344			48075		56050		53259		50522

## Sheet: Table S2
Table S2. Analysis of variance for trinucleotide repeat motifs																	Three fruit tissues					Developmental period					Error
SSR motif	Amino acid	RT-1	RT-2	RT-3	RT-4	Mean value	FT-1	FT-2	FT-3	FT-4	Mean value	ST-1	ST-2	ST-3	ST-4	Mean value	Sum of squares	df	Mean of squares	F	P	Sum of squares	df	Mean of squares	F	P	Sum of squares	df	Mean of squares
AAC	Asn	83	85	82	82	83	94	74	74	74	79	95	96	100	89	95	554.67	2	277.33	6.84	0.028	124.67	3	41.56	1.03	0.446	243.33	6	40.56
TTG	Leu	142	179	190	156	166.75	142	145	133	128	137	157	154	154	167	158	1870.17	2	935.08	4.09	0.076	347.58	3	115.86	0.51	0.692	1371.17	6	228.53
AAG	Lys	204	214	207	181	201.5	188	191	162	152	173.25	169	177	192	193	182.75	1653.17	2	826.58	3.11	0.119	539	3	179.67	0.68	0.598	1597.5	6	266.25
TTC	Phe	245	290	264	258	264.25	233	221	205	224	220.75	274	260	270	269	268.25	5552.67	2	2776.33	11.8	0.008	174.92	3	58.31	0.25	0.86	1411.33	6	235.22
AAT	Asn	375	428	434	383	405	353	297	288	297	308.75	325	321	315	391	338	19478.2	2	9739.08	6.49	0.032	207.58	3	69.19	0.05	0.986	9007.17	6	1501.19
TTA	Leu	255	293	236	237	255.25	226	197	194	200	204.25	235	228	216	240	229.75	5202	2	2601	8.15	0.019	1187.58	3	395.86	1.24	0.375	1914.67	6	319.11
ACA	Thr	62	86	84	73	76.25	56	63	80	74	68.25	60	71	75	78	71	132.17	2	66.08	1.85	0.236	689.67	3	229.89	6.45	0.026	213.83	6	35.64
TGT	Cys	90	99	84	94	91.75	87	86	79	63	78.75	87	80	81	94	85.5	338.17	2	169.08	1.99	0.217	104.67	3	34.89	0.41	0.751	509.83	6	84.97
ACC	Thr	55	67	79	66	66.75	59	59	53	55	56.5	64	58	64	62	62	210.5	2	105.25	2.24	0.187	58.25	3	19.42	0.41	0.749	281.5	6	46.92
TGG	Trp	92	101	109	90	98	82	75	86	81	81	81	92	93	88	88.5	580.67	2	290.33	10.58	0.011	216.33	3	72.11	2.63	0.145	164.67	6	27.44
ACG	Thr	0	3	8	1	3	2	2	2	1	1.75	1	1	3	2	1.75	4.17	2	2.08	0.59	0.583	20.33	3	6.78	1.92	0.227	21.17	6	3.53
TGC	Cys	49	50	51	42	48	41	47	45	38	42.75	40	43	54	48	46.25	57.17	2	28.58	1.58	0.282	102.67	3	34.22	1.89	0.233	108.83	6	18.14
ACT	Thr	28	27	27	28	27.5	27	25	33	33	29.5	23	29	19	29	25	40.67	2	20.33	1.3	0.34	30	3	10	0.64	0.617	94	6	15.67
TGA	Stop	151	181	140	144	154	171	143	146	121	145.25	141	160	133	159	148.25	158.17	2	79.08	0.26	0.782	979	3	326.33	1.06	0.434	1850.5	6	308.42
AGA	Arg	193	206	186	181	191.5	195	186	197	166	186	187	202	201	199	197.25	253.17	2	126.58	1.13	0.383	427.58	3	142.53	1.27	0.365	672.17	6	112.03
TCT	Ser	239	287	268	271	266.25	224	239	229	218	227.5	240	244	257	270	252.75	3095.17	2	1547.58	8.4	0.018	885.67	3	295.22	1.6	0.285	1104.83	6	184.14
AGC	Ser	25	23	43	23	28.5	20	20	16	17	18.25	21	21	27	25	23.5	210.17	2	105.08	2.98	0.126	110.92	3	36.97	1.05	0.437	211.83	6	35.31
TCG	Ser	9	13	22	12	14	4	7	13	10	8.5	6	5	6	12	7.25	103.17	2	51.58	4.1	0.075	94.25	3	31.42	2.5	0.157	75.5	6	12.58
AGG	Arg	29	25	35	22	27.75	34	27	20	21	25.5	26	32	23	29	27.5	12.17	2	6.08	0.17	0.845	54.25	3	18.08	0.52	0.687	210.5	6	35.08
TCC	Ser	39	40	40	39	39.5	32	35	28	33	32	32	35	38	34	34.75	115.17	2	57.58	9.21	0.015	8.25	3	2.75	0.44	0.733	37.5	6	6.25
AGT	Ser	31	32	29	36	32	22	25	24	24	23.75	21	26	26	30	25.75	148.17	2	74.08	17.21	0.003	45.67	3	15.22	3.54	0.088	25.83	6	4.31
TCA	Ser	158	174	185	163	170	135	131	136	132	133.5	163	162	149	173	161.75	2931.17	2	1465.58	12.52	0.007	39.58	3	13.19	0.11	0.949	702.17	6	117.03
ATA	Ile	85	112	114	115	106.5	98	90	84	81	88.25	93	85	101	120	99.75	681.17	2	340.58	1.75	0.253	293.67	3	97.89	0.5	0.695	1170.83	6	195.14
TAT	Tyr	94	113	90	92	97.25	83	76	75	91	81.25	78	85	82	95	85	560.17	2	280.08	3.82	0.085	221.67	3	73.89	1.01	0.452	439.83	6	73.31
ATC	Ile	113	146	131	95	121.25	115	109	110	95	107.25	102	102	124	123	112.75	398	2	199	0.76	0.508	578.92	3	192.97	0.74	0.567	1569.33	6	261.56
TAG	Stop	16	23	21	17	19.25	15	14	17	15	15.25	16	18	21	21	19	40.17	2	20.08	3.95	0.08	25	3	8.33	1.64	0.277	30.5	6	5.08
ATG	Met	78	79	91	84	83	66	74	66	89	73.75	75	60	68	95	74.5	211.17	2	105.58	1.25	0.352	624.25	3	208.08	2.46	0.16	507.5	6	84.58
TAC	Tyr	23	20	19	20	20.5	21	21	20	22	21	21	18	20	22	20.25	1.17	2	0.58	0.37	0.706	10.25	3	3.42	2.16	0.194	9.5	6	1.58
ATT	Ile	184	233	213	214	211	179	160	168	205	178	183	187	184	217	192.75	2186.17	2	1093.08	3.93	0.081	1501.58	3	500.53	1.8	0.248	1671.17	6	278.53
TAA	Stop	79	94	87	78	84.5	92	63	64	57	69	77	70	74	101	80.5	518	2	259	1.13	0.384	110	3	36.67	0.16	0.92	1378	6	229.67
CAA	Gln	143	146	133	131	138.25	134	117	124	100	118.75	138	135	147	138	139.5	1083.17	2	541.58	6.87	0.028	385.67	3	128.56	1.63	0.279	472.83	6	78.81
GTT	Val	55	63	66	51	58.75	48	37	50	42	44.25	49	45	44	46	46	501.17	2	250.58	8.28	0.019	82	3	27.33	0.9	0.493	181.5	6	30.25
CAC	His	86	114	112	96	102	89	92	74	77	83	104	107	110	112	108.25	1383.5	2	691.75	7.11	0.026	222.92	3	74.31	0.76	0.554	583.83	6	97.31
GTG	Val	88	101	91	95	93.75	92	58	64	75	72.25	88	91	86	98	90.75	1084.67	2	542.33	4.9	0.055	182.25	3	60.75	0.55	0.667	664	6	110.67
CAG	Gln	45	41	72	43	50.25	39	41	25	32	34.25	42	41	49	52	46	549.5	2	274.75	2.13	0.2	109.67	3	36.56	0.28	0.836	773.83	6	128.97
GTC	Val	4	6	8	1	4.75	6	4	5	4	4.75	8	3	2	5	4.5	0.17	2	0.08	0.01	0.987	11.33	3	3.78	0.58	0.65	39.17	6	6.53
CAT	His	114	111	124	104	113.25	103	89	95	82	92.25	93	107	96	101	99.25	914.67	2	457.33	6.74	0.029	150.92	3	50.31	0.74	0.565	407.33	6	67.89
GTA	Val	19	24	17	14	18.5	21	21	16	12	17.5	16	20	22	14	18	2	2	1	0.14	0.872	107.33	3	35.78	5.03	0.045	42.67	6	7.11
CCA	Pro	116	156	133	122	131.75	136	139	135	107	129.25	134	128	141	136	134.75	60.67	2	30.33	0.18	0.843	652.92	3	217.64	1.26	0.369	1035.33	6	172.56
GGT	Gly	67	75	103	64	77.25	63	63	60	52	59.5	74	82	77	67	75	747.17	2	373.58	3.98	0.079	584.25	3	194.75	2.07	0.205	563.5	6	93.92
CCG	Pro	7	5	6	5	5.75	5	8	11	3	6.75	3	3	10	4	5	6.17	2	3.08	0.61	0.576	43	3	14.33	2.82	0.13	30.5	6	5.08
GGC	Gly	7	7	12	4	7.5	4	5	7	1	4.25	4	3	3	4	3.5	36.17	2	18.08	4.43	0.066	28.25	3	9.42	2.31	0.177	24.5	6	4.08
CCT	Pro	29	36	37	32	33.5	28	26	21	21	24	31	31	31	27	30	184.67	2	92.33	9.03	0.015	29.67	3	9.89	0.97	0.467	61.33	6	10.22
GGA	Gly	31	31	45	27	33.5	41	29	23	32	31.25	35	26	37	27	31.25	13.5	2	6.75	0.13	0.882	134	3	44.67	0.85	0.514	314.5	6	52.42
CGA	Arg	2	3	7	3	3.75	3	3	3	4	3.25	3	3	4	2	3	1.17	2	0.58	0.34	0.722	7.33	3	2.44	1.44	0.321	10.17	6	1.69
GCT	Ala	21	20	58	22	30.25	24	19	21	20	21	19	21	21	16	19.25	279.5	2	139.75	1.26	0.35	393	3	131	1.18	0.393	666.5	6	111.08
CGC	Arg	6	2	12	1	5.25	0	2	5	0	1.75	2	4	1	0	1.75	32.67	2	16.33	1.91	0.228	48.92	3	16.31	1.91	0.23	51.33	6	8.56
GCG	Ala	2	3	11	0	4	4	3	1	0	2	1	1	5	0	1.75	12.17	2	6.08	0.8	0.493	48.92	3	16.31	2.14	0.197	45.83	6	7.64
CGG	Arg	2	1	9	2	3.5	1	1	3	2	1.75	3	1	1	3	2	7.17	2	3.58	0.71	0.528	17.58	3	5.86	1.17	0.398	30.17	6	5.03
GCC	Ala	5	3	7	3	4.5	5	5	6	1	4.25	3	3	10	2	4.5	0.17	2	0.08	0.03	0.969	50.92	3	16.97	6.43	0.026	15.83	6	2.64
CGT	Arg	8	6	12	5	7.75	3	7	2	5	4.25	7	9	7	2	6.25	24.67	2	12.33	1.48	0.3	20.25	3	6.75	0.81	0.533	50	6	8.33
GCA	Ala	27	19	58	21	31.25	27	19	17	25	22	23	21	17	16	19.25	316.17	2	158.08	1.11	0.39	231	3	77	0.54	0.673	858.5	6	143.08
CTA	Leu	23	14	18	18	18.25	18	21	21	17	19.25	19	17	21	25	20.5	10.17	2	5.08	0.42	0.675	16	3	5.33	0.44	0.732	72.5	6	12.08
GAT	Asp	109	134	127	127	124.25	112	115	104	106	109.25	107	113	114	129	115.75	452.67	2	226.33	3.24	0.111	264.92	3	88.31	1.26	0.368	419.33	6	69.89
CTC	Leu	48	45	59	46	49.5	48	42	46	36	43	50	49	41	52	48	92.67	2	46.33	1.17	0.373	41	3	13.67	0.35	0.795	238	6	39.67
GAG	Glu	39	42	57	39	44.25	38	38	29	32	34.25	38	42	41	40	40.25	202.67	2	101.33	2.52	0.161	50.92	3	16.97	0.42	0.744	241.33	6	40.22
CTG	Leu	18	13	39	19	22.25	20	21	27	18	21.5	21	26	23	17	21.75	1.17	2	0.58	0.02	0.985	252.33	3	84.11	2.19	0.19	230.17	6	38.36
GAC	Asp	9	13	22	13	14.25	14	10	8	10	10.5	9	16	12	11	12	28.5	2	14.25	0.75	0.514	20.92	3	6.97	0.36	0.782	114.83	6	19.14
CTT	Leu	135	145	142	134	139	127	116	123	122	122	119	132	144	128	130.75	578.17	2	289.08	5.55	0.043	158.25	3	52.75	1.01	0.45	312.5	6	52.08
GAA	Glu	211	233	251	177	218	199	199	180	176	188.5	210	226	220	197	213.25	2007.17	2	1003.58	3.91	0.082	2434.92	3	811.64	3.16	0.107	1540.83	6	256.81

## Sheet: Table S3
Table S3. Chi-square test for complementary trinucleotide repeat motifs（1:1）
	RT-1	RT-2	RT-3	RT-4	FT-1	FT-2	FT-3	FT-4	ST-1	ST-2	ST-3	ST-4
AAC (Asn)	83	85	82	82	94	74	74	74	95	96	100	89
TTG (Leu)	142	179	190	156	142	145	133	128	157	154	154	167
P	8.37759e-05	7.2383e-09	5.81327e-11	1.61295e-06	0.00178087	1.6047e-06	4.11754e-05	0.000145031	9.39791e-05	0.000244224	0.000703372	1.08808e-06
c²	15.47	33.47	42.88	23.01	9.76	23.02	16.82	14.44	15.25	13.46	11.48	23.77
AAT（Asn）	375	428	434	383	353	297	288	297	325	321	315	391
TTA（Leu）	255	293	236	237	226	197	194	200	235	228	216	240
P	1.745e-06	4.96494e-07	2.01908e-14	4.53208e-09	1.30644e-07	6.82056e-06	1.85569e-05	1.3549e-05	0.000142842	7.21315e-05	1.73724e-05	1.84138e-09
c²	22.86	25.28	58.51	34.38	27.86	20.24	18.33	18.93	14.46	15.75	18.46	36.13
ACA (Thr)	62	86	84	73	56	63	80	74	60	71	75	78
TGT (Cys)	90	99	84	94	87	86	79	63	87	80	81	94
P	0.0231409	0.339184	1	0.104156	0.00953227	0.0595334	0.93679	0.347324	0.0259525	0.463919	0.630954	0.222469
c²	5.16	0.91	0	2.64	6.72	3.55	0.01	0.88	4.96	0.54	0.23	1.49
ACT (Thr)	28	27	27	28	27	25	33	33	23	29	19	29
TGA (Stop)	151	181	140	144	171	143	146	121	141	160	133	159
P	3.80434e-20	1.29051e-26	2.24596e-18	9.15963e-19	1.40159e-24	8.71469e-20	3.01411e-17	1.32914e-12	3.13456e-20	1.59038e-21	2.31702e-20	2.51317e-21
c²	84.52	114.02	76.46	78.23	104.73	82.88	71.34	50.29	84.9	90.8	85.5	89.89
AGA (Arg)	193	206	186	181	195	186	197	166	187	202	201	199
TCT (Ser)	239	287	268	271	224	239	229	218	240	244	257	270
P	0.0268855	0.000264232	0.000118867	2.30344e-05	0.156558	0.0101441	0.121044	0.00796349	0.010322	0.046728	0.00887822	0.00104369
c²	4.9	13.31	14.81	17.92	2.01	6.61	2.4	7.04	6.58	3.96	6.85	10.75
AGG (Arg)	29	25	35	22	34	27	20	21	26	32	23	29
TCC (Ser)	39	40	40	39	32	35	28	33	32	35	38	34
P	0.225253	0.0628118	0.563703	0.0295084	0.805541	0.309629	0.248213	0.10247	0.430791	0.713986	0.0547881	0.528733
c²	1.47	3.46	0.33	4.74	0.06	1.03	1.33	2.67	0.62	0.13	3.69	0.4
AGT (Ser)	31	32	29	36	22	25	24	24	21	26	26	30
TCA (Ser)	158	174	185	163	135	131	136	132	163	162	149	173
P	2.51404e-20	4.43737e-23	1.501e-26	2.2005e-19	1.90888e-19	2.12419e-17	8.41522e-19	5.29079e-18	1.20692e-25	3.4481e-23	1.43212e-20	1.05205e-23
X2	85.34	97.88	113.72	81.05	81.33	72.03	78.4	74.77	109.59	98.38	86.45	100.73
ATA (Ile)	85	112	114	115	98	90	84	81	93	85	101	120
TAT (Tyr)	94	113	90	92	83	76	75	91	78	85	82	95
P	0.501144	0.946847	0.0928919	0.109907	0.264876	0.277209	0.475384	0.445766	0.251349	1	0.160164	0.0881971
c²	0.45	0	2.82	2.56	1.24	1.18	0.51	0.58	1.32	0	1.97	2.91
ATC (Ile)	113	146	131	95	115	109	110	95	102	102	124	123
TAG (Stop)	16	23	21	17	15	14	17	15	16	18	21	21
P	1.33788e-17	3.03445e-21	4.57206e-19	1.70235e-13	1.77748e-18	1.07271e-17	1.55225e-16	2.38978e-14	2.43424e-15	1.74541e-14	1.19221e-17	1.89591e-17
c²	72.94	89.52	79.61	54.32	76.92	73.37	68.1	58.18	62.68	58.8	73.17	72.25
ATG (Met）	78	79	91	84	66	74	66	89	75	60	68	95
TAC (Tyr)	23	20	19	20	21	21	20	22	21	18	20	22
P	4.43219e-08	3.03446e-09	6.65236e-12	3.48028e-10	1.4035e-06	5.39772e-08	7.03817e-07	2.02598e-10	3.56088e-08	1.97894e-06	3.10735e-07	1.49019e-11
c²	29.95	35.16	47.13	39.38	23.28	29.57	24.6	40.44	30.38	22.62	26.18	45.55
CAA (Gln)	143	146	133	131	134	117	124	100	138	135	147	138
GTT (Val)	55	63	66	51	48	37	50	42	49	45	44	46
P	4.00359e-10	9.39913e-09	2.03916e-06	3.02945e-09	1.83269e-10	1.14399e-10	2.02414e-08	1.13161e-06	7.59936e-11	1.97034e-11	9.1367e-14	1.18253e-11
X2	39.11	32.96	22.56	35.16	40.64	41.56	31.47	23.69	42.36	45	55.54	46
ATT (Ile)	184	233	213	214	179	160	168	205	183	187	184	217
TAA (Stop)	79	94	87	78	92	63	64	57	77	70	74	101
P	9.50777e-11	1.50958e-14	3.47414e-13	1.73719e-15	1.25792e-07	8.27029e-11	8.61459e-12	6.04796e-20	4.90336e-11	2.91514e-13	7.47323e-12	7.77156e-11
c²	41.92	59.09	52.92	63.34	27.93	42.19	46.62	83.6	43.22	53.26	46.9	42.31
CAC (His)	86	114	112	96	89	92	74	77	104	107	110	112
GTG (Val)	88	101	91	95	92	58	64	75	88	91	86	98
P	0.879487	0.375298	0.140506	0.942317	0.823545	0.00550173	0.394627	0.871131	0.248213	0.255509	0.0864763	0.333998
c²	0.02	0.79	2.17	0.01	0.05	7.71	0.72	0.03	1.33	1.29	2.94	0.93
CAT (His)	114	111	124	104	103	89	95	82	93	107	96	101
GTA (Val)	19	24	17	14	21	21	16	12	16	20	22	14
P	1.75781e-16	7.00548e-14	2.04138e-19	1.17939e-16	1.78724e-13	8.95918e-11	6.46271e-14	5.20072e-13	1.64022e-13	1.16328e-14	9.60825e-12	4.94698e-16
c²	67.86	56.07	81.2	68.64	54.23	42.04	56.23	52.13	54.39	59.6	46.41	65.82
CCA (Pro)	116	156	133	122	136	139	135	107	134	128	141	136
GGT (Gly)	67	75	103	64	63	63	60	52	74	82	77	67
P	0.000292126	9.8533e-08	0.0508393	2.11146e-05	2.28115e-07	8.92556e-08	7.83614e-08	1.29006e-05	3.17897e-05	0.00150198	1.46008e-05	1.2799e-06
X2	13.12	28.4	3.81	18.09	26.78	28.59	28.85	19.03	17.31	10.08	18.79	23.45
CCT (Pro)	29	36	37	32	28	26	21	21	31	31	31	27
GGA (Gly)	31	31	45	27	41	29	23	32	35	26	37	27
P	0.796253	0.541301	0.376992	0.515082	0.117579	0.68583	0.763025	0.130797	0.622461	0.507801	0.466854	1
c²	0.07	0.37	0.78	0.42	2.45	0.16	0.09	2.28	0.24	0.44	0.53	0
CTA (Leu)	23	14	18	18	18	21	21	17	19	17	21	25
GAT (Asp)	109	134	127	127	112	115	104	106	107	113	114	129
P	7.13626e-14	5.96617e-23	1.40428e-19	1.40428e-19	1.66067e-16	7.60244e-16	1.13854e-13	1.01642e-15	4.51757e-15	3.77266e-17	1.20279e-15	5.2677e-17
c²	56.03	97.3	81.94	81.94	67.97	64.97	55.11	64.4	61.46	70.89	64.07	70.23
CTC (Leu)	48	45	59	46	48	42	46	36	50	49	41	52
GAG (Glu)	39	42	57	39	38	38	29	32	38	42	41	40
P	0.334594	0.74773	0.852684	0.447699	0.280888	0.654721	0.0496472	0.627626	0.200825	0.463071	1	0.210903
c²	0.93	0.1	0.03	0.58	1.16	0.2	3.85	0.24	1.64	0.54	0	1.57
CTT (Leu)	135	145	142	134	127	116	123	122	119	132	144	128
GAA (Glu)	211	233	251	177	199	199	180	176	210	226	220	197
P	4.3928e-05	6.00448e-06	3.83421e-08	0.0147563	6.67138e-05	2.91784e-06	0.00105825	0.00175919	5.24866e-07	6.7628e-07	6.79127e-05	0.000129487
c²	16.69	20.49	30.23	5.95	15.9	21.87	10.72	9.79	25.17	24.68	15.87	14.65
AAG (Lys)	204	214	207	181	188	191	162	152	169	177	192	193
TTC (Phe)	245	290	264	258	233	221	205	224	274	260	270	269
P	0.0530014	0.000710982	0.00862879	0.000237841	0.0282954	0.139409	0.024795	0.000204723	6.07868e-07	7.17435e-05	0.000284644	0.000406481
c²	3.74	11.46	6.9	13.51	4.81	2.18	5.04	13.79	24.89	15.76	13.17	12.5
ACC (Thr)	55	67	79	66	59	59	53	55	64	58	64	62
TGG (Trp)	92	101	109	90	82	75	86	81	81	92	93	88
P	0.00227543	0.00871191	0.0286714	0.0546639	0.0527515	0.166914	0.00512574	0.0257819	0.158017	0.00550173	0.0206429	0.033763
c²	9.31	6.88	4.79	3.69	3.75	1.91	7.83	4.97	1.99	7.71	5.36	4.51

## Sheet: Table S4
Table S4. KEGG annotation of ungenes carrying SSRs
T01-03_TRINITY_DN10035_c1_g1_i2	ko00270	Cysteine and methionine metabolism	Amino acid metabolism
T01-03_TRINITY_DN1004_c2_g1_i7	ko00230	Purine metabolism	Nucleotide metabolism
T01-03_TRINITY_DN1004_c2_g1_i7	ko00240	Pyrimidine metabolism	Nucleotide metabolism
T01-03_TRINITY_DN1004_c3_g1_i2	ko00190	Oxidative phosphorylation	Energy metabolism
T01-03_TRINITY_DN1004_c3_g2_i1	ko00190	Oxidative phosphorylation	Energy metabolism
T01-03_TRINITY_DN10047_c0_g1_i3	ko00030	Pentose phosphate pathway	Carbohydrate metabolism
T01-03_TRINITY_DN10064_c1_g1_i1	ko00190	Oxidative phosphorylation	Energy metabolism
T01-03_TRINITY_DN10064_c1_g1_i1	ko00195	Photosynthesis	Energy metabolism
T01-03_TRINITY_DN10064_c4_g1_i1	ko00630	Glyoxylate and dicarboxylate metabolism	Carbohydrate metabolism
T01-03_TRINITY_DN10068_c0_g1_i10	ko00052	Galactose metabolism	Carbohydrate metabolism
T01-03_TRINITY_DN10068_c0_g1_i10	ko00511	Other glycan degradation	Glycan biosynthesis and metabolism
T01-03_TRINITY_DN10068_c0_g1_i10	ko00531	Glycosaminoglycan degradation	Glycan biosynthesis and metabolism
T01-03_TRINITY_DN10068_c0_g1_i10	ko00604	Glycosphingolipid biosynthesis - ganglio series	Glycan biosynthesis and metabolism
T01-03_TRINITY_DN10068_c0_g1_i10	ko00600	Sphingolipid metabolism	Lipid metabolism
T01-03_TRINITY_DN10069_c0_g1_i8	ko00040	Pentose and glucuronate interconversions	Carbohydrate metabolism
T01-03_TRINITY_DN10073_c0_g1_i5	ko00531	Glycosaminoglycan degradation	Glycan biosynthesis and metabolism
T01-03_TRINITY_DN10074_c1_g1_i1	ko00564	Glycerophospholipid metabolism	Lipid metabolism
T01-03_TRINITY_DN10074_c1_g1_i1	ko00440	Phosphonate and phosphinate metabolism	Metabolism of other amino acids
T01-03_TRINITY_DN1008_c0_g2_i1	ko00195	Photosynthesis	Energy metabolism
T01-03_TRINITY_DN10120_c1_g5_i1	ko00195	Photosynthesis	Energy metabolism
T01-03_TRINITY_DN10131_c1_g1_i1	ko00196	Photosynthesis - antenna proteins	Energy metabolism
T01-03_TRINITY_DN10131_c1_g2_i1	ko00196	Photosynthesis - antenna proteins	Energy metabolism
T01-03_TRINITY_DN10135_c0_g4_i1	ko00520	Amino sugar and nucleotide sugar metabolism	Carbohydrate metabolism
T01-03_TRINITY_DN102_c1_g1_i4	ko00500	Starch and sucrose metabolism	Carbohydrate metabolism
T01-03_TRINITY_DN1020_c0_g1_i3	ko00053	Ascorbate and aldarate metabolism	Carbohydrate metabolism
T01-03_TRINITY_DN1020_c0_g1_i3	ko00480	Glutathione metabolism	Metabolism of other amino acids
T01-03_TRINITY_DN1031_c1_g2_i1	ko00480	Glutathione metabolism	Metabolism of other amino acids
T01-03_TRINITY_DN1031_c1_g2_i1	ko00980	Metabolism of xenobiotics by cytochrome P450	Xenobiotics biodegradation and metabolism
T01-03_TRINITY_DN1031_c1_g2_i1	ko00982	Drug metabolism - cytochrome P450	Xenobiotics biodegradation and metabolism
T01-03_TRINITY_DN1031_c1_g2_i1	ko00983	Drug metabolism - other enzymes	Xenobiotics biodegradation and metabolism
T01-03_TRINITY_DN10317_c2_g1_i1	ko00190	Oxidative phosphorylation	Energy metabolism
T01-03_TRINITY_DN10318_c0_g1_i8	ko00230	Purine metabolism	Nucleotide metabolism
T01-03_TRINITY_DN10336_c0_g1_i1	ko00860	Porphyrin metabolism	Metabolism of cofactors and vitamins
T01-03_TRINITY_DN10342_c0_g1_i15	ko00510	N-Glycan biosynthesis	Glycan biosynthesis and metabolism
T01-03_TRINITY_DN10363_c0_g7_i1	ko00260	Glycine, serine and threonine metabolism	Amino acid metabolism
T01-03_TRINITY_DN10363_c0_g7_i1	ko00400	Phenylalanine, tyrosine and tryptophan biosynthesis	Amino acid metabolism
T01-03_TRINITY_DN10370_c0_g1_i1	ko00260	Glycine, serine and threonine metabolism	Amino acid metabolism
T01-03_TRINITY_DN10370_c0_g1_i1	ko00280	Valine, leucine and isoleucine degradation	Amino acid metabolism
T01-03_TRINITY_DN10370_c0_g1_i1	ko00010	Glycolysis / Gluconeogenesis	Carbohydrate metabolism
T01-03_TRINITY_DN10370_c0_g1_i1	ko00020	Citrate cycle (TCA cycle)	Carbohydrate metabolism
T01-03_TRINITY_DN10370_c0_g1_i1	ko00620	Pyruvate metabolism	Carbohydrate metabolism
T01-03_TRINITY_DN10370_c0_g1_i1	ko00630	Glyoxylate and dicarboxylate metabolism	Carbohydrate metabolism
T01-03_TRINITY_DN10370_c0_g1_i1	ko00640	Propanoate metabolism	Carbohydrate metabolism
T01-03_TRINITY_DN10370_c0_g2_i1	ko00260	Glycine, serine and threonine metabolism	Amino acid metabolism
T01-03_TRINITY_DN10370_c0_g2_i1	ko00280	Valine, leucine and isoleucine degradation	Amino acid metabolism
T01-03_TRINITY_DN10370_c0_g2_i1	ko00010	Glycolysis / Gluconeogenesis	Carbohydrate metabolism
T01-03_TRINITY_DN10370_c0_g2_i1	ko00020	Citrate cycle (TCA cycle)	Carbohydrate metabolism
T01-03_TRINITY_DN10370_c0_g2_i1	ko00620	Pyruvate metabolism	Carbohydrate metabolism
T01-03_TRINITY_DN10370_c0_g2_i1	ko00630	Glyoxylate and dicarboxylate metabolism	Carbohydrate metabolism
T01-03_TRINITY_DN10370_c0_g2_i1	ko00640	Propanoate metabolism	Carbohydrate metabolism
T01-03_TRINITY_DN10389_c0_g1_i12	ko00230	Purine metabolism	Nucleotide metabolism
T01-03_TRINITY_DN10389_c0_g1_i12	ko00240	Pyrimidine metabolism	Nucleotide metabolism
T01-03_TRINITY_DN1039_c0_g2_i2	ko00310	Lysine degradation	Amino acid metabolism
T01-03_TRINITY_DN1042_c0_g1_i7	ko00400	Phenylalanine, tyrosine and tryptophan biosynthesis	Amino acid metabolism
T01-03_TRINITY_DN10435_c0_g1_i1	ko00910	Nitrogen metabolism	Energy metabolism
T01-03_TRINITY_DN10435_c0_g2_i2	ko00910	Nitrogen metabolism	Energy metabolism
T01-03_TRINITY_DN10436_c8_g1_i1	ko00565	Ether lipid metabolism	Lipid metabolism
T01-03_TRINITY_DN1048_c0_g1_i3	ko00790	Folate biosynthesis	Metabolism of cofactors and vitamins
T01-03_TRINITY_DN10481_c0_g1_i1	ko00290	Valine, leucine and isoleucine biosynthesis	Amino acid metabolism
T01-03_TRINITY_DN10481_c0_g1_i1	ko00650	Butanoate metabolism	Carbohydrate metabolism
T01-03_TRINITY_DN10481_c0_g1_i1	ko00660	C5-Branched dibasic acid metabolism	Carbohydrate metabolism
T01-03_TRINITY_DN10481_c0_g1_i1	ko00770	Pantothenate and CoA biosynthesis	Metabolism of cofactors and vitamins
T01-03_TRINITY_DN10490_c0_g1_i2	ko00040	Pentose and glucuronate interconversions	Carbohydrate metabolism
T01-03_TRINITY_DN10505_c2_g1_i1	ko00062	Fatty acid elongation	Lipid metabolism
T01-03_TRINITY_DN10533_c0_g1_i2	ko00905	Brassinosteroid biosynthesis	Metabolism of terpenoids and polyketides
T01-03_TRINITY_DN1054_c0_g1_i1	ko00480	Glutathione metabolism	Metabolism of other amino acids
T01-03_TRINITY_DN1054_c0_g1_i1	ko00980	Metabolism of xenobiotics by cytochrome P450	Xenobiotics biodegradation and metabolism
T01-03_TRINITY_DN1054_c0_g1_i1	ko00982	Drug metabolism - cytochrome P450	Xenobiotics biodegradation and metabolism
T01-03_TRINITY_DN1054_c0_g1_i1	ko00983	Drug metabolism - other enzymes	Xenobiotics biodegradation and metabolism
T01-03_TRINITY_DN1054_c0_g2_i11	ko00480	Glutathione metabolism	Metabolism of other amino acids
T01-03_TRINITY_DN1054_c0_g2_i11	ko00980	Metabolism of xenobiotics by cytochrome P450	Xenobiotics biodegradation and metabolism
T01-03_TRINITY_DN1054_c0_g2_i11	ko00982	Drug metabolism - cytochrome P450	Xenobiotics biodegradation and metabolism
T01-03_TRINITY_DN1054_c0_g2_i11	ko00983	Drug metabolism - other enzymes	Xenobiotics biodegradation and metabolism
T01-03_TRINITY_DN10540_c1_g2_i2	ko00590	Arachidonic acid metabolism	Lipid metabolism
T01-03_TRINITY_DN10544_c0_g1_i14	ko00790	Folate biosynthesis	Metabolism of cofactors and vitamins
T01-03_TRINITY_DN10544_c0_g2_i1	ko00760	Nicotinate and nicotinamide metabolism	Metabolism of cofactors and vitamins
T01-03_TRINITY_DN10544_c0_g2_i1	ko00240	Pyrimidine metabolism	Nucleotide metabolism
T01-03_TRINITY_DN10544_c0_g3_i5	ko00760	Nicotinate and nicotinamide metabolism	Metabolism of cofactors and vitamins
T01-03_TRINITY_DN10544_c0_g3_i5	ko00240	Pyrimidine metabolism	Nucleotide metabolism
T01-03_TRINITY_DN10544_c0_g4_i12	ko00790	Folate biosynthesis	Metabolism of cofactors and vitamins
T01-03_TRINITY_DN1060_c0_g2_i1	ko00010	Glycolysis / Gluconeogenesis	Carbohydrate metabolism
T01-03_TRINITY_DN1060_c0_g2_i1	ko00680	Methane metabolism	Energy metabolism
T01-03_TRINITY_DN10604_c3_g1_i1	ko00062	Fatty acid elongation	Lipid metabolism
T01-03_TRINITY_DN10607_c1_g2_i6	ko00230	Purine metabolism	Nucleotide metabolism
T01-03_TRINITY_DN10607_c1_g2_i6	ko00240	Pyrimidine metabolism	Nucleotide metabolism
T01-03_TRINITY_DN10614_c1_g1_i1	ko00760	Nicotinate and nicotinamide metabolism	Metabolism of cofactors and vitamins
T01-03_TRINITY_DN10614_c1_g1_i1	ko00230	Purine metabolism	Nucleotide metabolism
T01-03_TRINITY_DN10614_c1_g1_i1	ko00240	Pyrimidine metabolism	Nucleotide metabolism
T01-03_TRINITY_DN10633_c0_g1_i1	ko00010	Glycolysis / Gluconeogenesis	Carbohydrate metabolism
T01-03_TRINITY_DN10633_c0_g2_i1	ko00010	Glycolysis / Gluconeogenesis	Carbohydrate metabolism
T01-03_TRINITY_DN10637_c0_g1_i18	ko00130	Ubiquinone and other terpenoid-quinone biosynthesis	Metabolism of cofactors and vitamins
T01-03_TRINITY_DN10640_c1_g1_i1	ko00010	Glycolysis / Gluconeogenesis	Carbohydrate metabolism
T01-03_TRINITY_DN10640_c1_g1_i1	ko00030	Pentose phosphate pathway	Carbohydrate metabolism
T01-03_TRINITY_DN10640_c1_g1_i1	ko00051	Fructose and mannose metabolism	Carbohydrate metabolism
T01-03_TRINITY_DN10640_c1_g1_i1	ko00680	Methane metabolism	Energy metabolism
T01-03_TRINITY_DN10640_c1_g1_i1	ko00710	Carbon fixation in photosynthetic organisms	Energy metabolism
T01-03_TRINITY_DN1065_c6_g1_i1	ko00760	Nicotinate and nicotinamide metabolism	Metabolism of cofactors and vitamins
T01-03_TRINITY_DN10651_c0_g1_i15	ko00500	Starch and sucrose metabolism	Carbohydrate metabolism
T01-03_TRINITY_DN10666_c0_g2_i3	ko00902	Monoterpenoid biosynthesis	Metabolism of terpenoids and polyketides
T01-03_TRINITY_DN10698_c0_g1_i1	ko00590	Arachidonic acid metabolism	Lipid metabolism
T01-03_TRINITY_DN10698_c0_g1_i1	ko00790	Folate biosynthesis	Metabolism of cofactors and vitamins
T01-03_TRINITY_DN10698_c0_g1_i1	ko00980	Metabolism of xenobiotics by cytochrome P450	Xenobiotics biodegradation and metabolism
T01-03_TRINITY_DN107_c1_g1_i2	ko00500	Starch and sucrose metabolism	Carbohydrate metabolism
T01-03_TRINITY_DN107_c1_g1_i2	ko00520	Amino sugar and nucleotide sugar metabolism	Carbohydrate metabolism
T01-03_TRINITY_DN1072_c1_g2_i1	ko00350	Tyrosine metabolism	Amino acid metabolism
T01-03_TRINITY_DN10734_c0_g1_i1	ko00562	Inositol phosphate metabolism	Carbohydrate metabolism
T01-03_TRINITY_DN10736_c0_g1_i4	ko00630	Glyoxylate and dicarboxylate metabolism	Carbohydrate metabolism
T01-03_TRINITY_DN10736_c0_g1_i4	ko00650	Butanoate metabolism	Carbohydrate metabolism
T01-03_TRINITY_DN10742_c1_g1_i5	ko00520	Amino sugar and nucleotide sugar metabolism	Carbohydrate metabolism
T01-03_TRINITY_DN1075_c5_g1_i1	ko00100	Steroid biosynthesis	Lipid metabolism
T01-03_TRINITY_DN10763_c0_g2_i6	ko00061	Fatty acid biosynthesis	Lipid metabolism
T01-03_TRINITY_DN10763_c0_g2_i6	ko00071	Fatty acid degradation	Lipid metabolism
T01-03_TRINITY_DN10768_c1_g2_i1	ko00513	Various types of N-glycan biosynthesis	Glycan biosynthesis and metabolism
T01-03_TRINITY_DN10768_c1_g2_i1	ko00514	Other types of O-glycan biosynthesis	Glycan biosynthesis and metabolism
T01-03_TRINITY_DN10779_c0_g1_i3	ko00900	Terpenoid backbone biosynthesis	Metabolism of terpenoids and polyketides
T01-03_TRINITY_DN10796_c0_g1_i6	ko00940	Phenylpropanoid biosynthesis	Biosynthesis of other secondary metabolites
T01-03_TRINITY_DN10796_c0_g2_i3	ko00940	Phenylpropanoid biosynthesis	Biosynthesis of other secondary metabolites
T01-03_TRINITY_DN10796_c0_g3_i3	ko00430	Taurine and hypotaurine metabolism	Metabolism of other amino acids
T01-03_TRINITY_DN10805_c1_g1_i4	ko00400	Phenylalanine, tyrosine and tryptophan biosynthesis	Amino acid metabolism
T01-03_TRINITY_DN10833_c0_g1_i1	ko00480	Glutathione metabolism	Metabolism of other amino acids
T01-03_TRINITY_DN10833_c0_g1_i1	ko00980	Metabolism of xenobiotics by cytochrome P450	Xenobiotics biodegradation and metabolism
T01-03_TRINITY_DN10833_c0_g1_i1	ko00982	Drug metabolism - cytochrome P450	Xenobiotics biodegradation and metabolism
T01-03_TRINITY_DN10833_c0_g1_i1	ko00983	Drug metabolism - other enzymes	Xenobiotics biodegradation and metabolism
T01-03_TRINITY_DN10847_c0_g1_i3	ko00190	Oxidative phosphorylation	Energy metabolism
T01-03_TRINITY_DN10848_c1_g1_i4	ko00900	Terpenoid backbone biosynthesis	Metabolism of terpenoids and polyketides
T01-03_TRINITY_DN10861_c0_g1_i1	ko00860	Porphyrin metabolism	Metabolism of cofactors and vitamins
T01-03_TRINITY_DN10882_c0_g1_i1	ko00900	Terpenoid backbone biosynthesis	Metabolism of terpenoids and polyketides
T01-03_TRINITY_DN1089_c0_g3_i1	ko00562	Inositol phosphate metabolism	Carbohydrate metabolism
T01-03_TRINITY_DN1089_c1_g2_i4	ko00270	Cysteine and methionine metabolism	Amino acid metabolism
T01-03_TRINITY_DN1089_c1_g2_i4	ko00450	Selenocompound metabolism	Metabolism of other amino acids
T01-03_TRINITY_DN10898_c0_g4_i2	ko00280	Valine, leucine and isoleucine degradation	Amino acid metabolism
T01-03_TRINITY_DN10898_c0_g4_i2	ko00640	Propanoate metabolism	Carbohydrate metabolism
T01-03_TRINITY_DN1090_c0_g1_i6	ko00010	Glycolysis / Gluconeogenesis	Carbohydrate metabolism
T01-03_TRINITY_DN1090_c0_g1_i6	ko00680	Methane metabolism	Energy metabolism
T01-03_TRINITY_DN10912_c0_g1_i1	ko00230	Purine metabolism	Nucleotide metabolism
T01-03_TRINITY_DN10915_c1_g1_i1	ko00564	Glycerophospholipid metabolism	Lipid metabolism
T01-03_TRINITY_DN10915_c1_g1_i1	ko00750	Vitamin B6 metabolism	Metabolism of cofactors and vitamins
T01-03_TRINITY_DN10929_c1_g1_i1	ko00600	Sphingolipid metabolism	Lipid metabolism
T01-03_TRINITY_DN10934_c1_g1_i1	ko00860	Porphyrin metabolism	Metabolism of cofactors and vitamins
T01-03_TRINITY_DN1098_c0_g1_i6	ko00310	Lysine degradation	Amino acid metabolism
T01-03_TRINITY_DN10988_c0_g2_i1	ko00960	Tropane, piperidine and pyridine alkaloid biosynthesis	Biosynthesis of other secondary metabolites
T01-03_TRINITY_DN11_c0_g3_i1	ko00270	Cysteine and methionine metabolism	Amino acid metabolism
T01-03_TRINITY_DN11000_c0_g1_i7	ko00620	Pyruvate metabolism	Carbohydrate metabolism
T01-03_TRINITY_DN1102_c0_g1_i2	ko00280	Valine, leucine and isoleucine degradation	Amino acid metabolism
T01-03_TRINITY_DN1102_c0_g1_i2	ko00640	Propanoate metabolism	Carbohydrate metabolism
T01-03_TRINITY_DN11059_c0_g1_i3	ko00500	Starch and sucrose metabolism	Carbohydrate metabolism
T01-03_TRINITY_DN11067_c0_g1_i10	ko00270	Cysteine and methionine metabolism	Amino acid metabolism
T01-03_TRINITY_DN11067_c0_g1_i10	ko00450	Selenocompound metabolism	Metabolism of other amino acids
T01-03_TRINITY_DN11067_c1_g2_i1	ko00270	Cysteine and methionine metabolism	Amino acid metabolism
T01-03_TRINITY_DN11067_c1_g2_i1	ko00450	Selenocompound metabolism	Metabolism of other amino acids
T01-03_TRINITY_DN1109_c0_g3_i2	ko00900	Terpenoid backbone biosynthesis	Metabolism of terpenoids and polyketides
T01-03_TRINITY_DN11093_c0_g1_i5	ko00600	Sphingolipid metabolism	Lipid metabolism
T01-03_TRINITY_DN11103_c0_g1_i9	ko00760	Nicotinate and nicotinamide metabolism	Metabolism of cofactors and vitamins
T01-03_TRINITY_DN11106_c2_g1_i1	ko00564	Glycerophospholipid metabolism	Lipid metabolism
T01-03_TRINITY_DN11106_c2_g1_i1	ko00565	Ether lipid metabolism	Lipid metabolism
T01-03_TRINITY_DN11131_c0_g4_i3	ko00600	Sphingolipid metabolism	Lipid metabolism
T01-03_TRINITY_DN11138_c0_g1_i2	ko00053	Ascorbate and aldarate metabolism	Carbohydrate metabolism
T01-03_TRINITY_DN11138_c0_g1_i2	ko00562	Inositol phosphate metabolism	Carbohydrate metabolism
T01-03_TRINITY_DN11147_c0_g1_i1	ko00100	Steroid biosynthesis	Lipid metabolism
T01-03_TRINITY_DN1117_c0_g2_i2	ko00240	Pyrimidine metabolism	Nucleotide metabolism
T01-03_TRINITY_DN1117_c0_g2_i2	ko00983	Drug metabolism - other enzymes	Xenobiotics biodegradation and metabolism
T01-03_TRINITY_DN11186_c1_g1_i1	ko00620	Pyruvate metabolism	Carbohydrate metabolism
T01-03_TRINITY_DN11186_c1_g1_i1	ko00710	Carbon fixation in photosynthetic organisms	Energy metabolism
T01-03_TRINITY_DN11215_c0_g1_i6	ko00053	Ascorbate and aldarate metabolism	Carbohydrate metabolism
T01-03_TRINITY_DN11215_c0_g1_i6	ko00480	Glutathione metabolism	Metabolism of other amino acids
T01-03_TRINITY_DN11229_c1_g1_i1	ko00620	Pyruvate metabolism	Carbohydrate metabolism
T01-03_TRINITY_DN11229_c1_g1_i1	ko00680	Methane metabolism	Energy metabolism
T01-03_TRINITY_DN11229_c1_g1_i1	ko00710	Carbon fixation in photosynthetic organisms	Energy metabolism
T01-03_TRINITY_DN11229_c1_g1_i1	ko00720	Carbon fixation pathways in prokaryotes	Energy metabolism
T01-03_TRINITY_DN11240_c2_g1_i3	ko00140	Steroid hormone biosynthesis	Lipid metabolism
T01-03_TRINITY_DN11264_c0_g1_i1	ko00514	Other types of O-glycan biosynthesis	Glycan biosynthesis and metabolism
T01-03_TRINITY_DN1127_c0_g2_i4	ko00053	Ascorbate and aldarate metabolism	Carbohydrate metabolism
T01-03_TRINITY_DN1127_c0_g2_i4	ko00562	Inositol phosphate metabolism	Carbohydrate metabolism
T01-03_TRINITY_DN11284_c0_g2_i1	ko00190	Oxidative phosphorylation	Energy metabolism
T01-03_TRINITY_DN1129_c0_g1_i8	ko00900	Terpenoid backbone biosynthesis	Metabolism of terpenoids and polyketides
T01-03_TRINITY_DN113_c0_g1_i4	ko00906	Carotenoid biosynthesis	Metabolism of terpenoids and polyketides
T01-03_TRINITY_DN1132_c0_g2_i11	ko00520	Amino sugar and nucleotide sugar metabolism	Carbohydrate metabolism
T01-03_TRINITY_DN1135_c0_g1_i13	ko00940	Phenylpropanoid biosynthesis	Biosynthesis of other secondary metabolites
T01-03_TRINITY_DN1135_c0_g1_i13	ko00500	Starch and sucrose metabolism	Carbohydrate metabolism
T01-03_TRINITY_DN1135_c0_g1_i13	ko00460	Cyanoamino acid metabolism	Metabolism of other amino acids
T01-03_TRINITY_DN1135_c0_g1_i13	ko00230	Purine metabolism	Nucleotide metabolism
T01-03_TRINITY_DN11368_c0_g1_i2	ko00250	Alanine, aspartate and glutamate metabolism	Amino acid metabolism
T01-03_TRINITY_DN11368_c0_g1_i2	ko00240	Pyrimidine metabolism	Nucleotide metabolism
T01-03_TRINITY_DN11380_c3_g1_i1	ko00520	Amino sugar and nucleotide sugar metabolism	Carbohydrate metabolism
T01-03_TRINITY_DN11380_c3_g2_i2	ko00520	Amino sugar and nucleotide sugar metabolism	Carbohydrate metabolism
T01-03_TRINITY_DN11385_c0_g1_i6	ko00010	Glycolysis / Gluconeogenesis	Carbohydrate metabolism
T01-03_TRINITY_DN11385_c0_g1_i6	ko00710	Carbon fixation in photosynthetic organisms	Energy metabolism
T01-03_TRINITY_DN11390_c0_g2_i1	ko00190	Oxidative phosphorylation	Energy metabolism
T01-03_TRINITY_DN11402_c1_g1_i1	ko00250	Alanine, aspartate and glutamate metabolism	Amino acid metabolism
T01-03_TRINITY_DN11440_c0_g1_i4	ko00190	Oxidative phosphorylation	Energy metabolism
T01-03_TRINITY_DN11446_c0_g1_i2	ko00710	Carbon fixation in photosynthetic organisms	Energy metabolism
T01-03_TRINITY_DN11447_c0_g1_i8	ko00190	Oxidative phosphorylation	Energy metabolism
T01-03_TRINITY_DN11447_c0_g1_i8	ko00195	Photosynthesis	Energy metabolism
T01-03_TRINITY_DN11447_c0_g4_i2	ko00190	Oxidative phosphorylation	Energy metabolism
T01-03_TRINITY_DN11447_c0_g4_i2	ko00195	Photosynthesis	Energy metabolism
T01-03_TRINITY_DN1145_c0_g4_i1	ko00860	Porphyrin metabolism	Metabolism of cofactors and vitamins
T01-03_TRINITY_DN1145_c1_g1_i29	ko00740	Riboflavin metabolism	Metabolism of cofactors and vitamins
T01-03_TRINITY_DN11474_c0_g1_i1	ko00730	Thiamine metabolism	Metabolism of cofactors and vitamins
T01-03_TRINITY_DN11474_c0_g1_i1	ko00900	Terpenoid backbone biosynthesis	Metabolism of terpenoids and polyketides
T01-03_TRINITY_DN1151_c0_g1_i11	ko00500	Starch and sucrose metabolism	Carbohydrate metabolism
T01-03_TRINITY_DN1151_c0_g2_i23	ko00500	Starch and sucrose metabolism	Carbohydrate metabolism
T01-03_TRINITY_DN11519_c0_g1_i17	ko00230	Purine metabolism	Nucleotide metabolism
T01-03_TRINITY_DN11519_c0_g2_i2	ko00230	Purine metabolism	Nucleotide metabolism
T01-03_TRINITY_DN1154_c1_g2_i3	ko00230	Purine metabolism	Nucleotide metabolism
T01-03_TRINITY_DN1155_c0_g2_i11	ko00250	Alanine, aspartate and glutamate metabolism	Amino acid metabolism
T01-03_TRINITY_DN1155_c0_g2_i11	ko00230	Purine metabolism	Nucleotide metabolism
T01-03_TRINITY_DN11554_c0_g1_i1	ko00010	Glycolysis / Gluconeogenesis	Carbohydrate metabolism
T01-03_TRINITY_DN11554_c0_g1_i1	ko00710	Carbon fixation in photosynthetic organisms	Energy metabolism
T01-03_TRINITY_DN11556_c0_g1_i1	ko00500	Starch and sucrose metabolism	Carbohydrate metabolism
T01-03_TRINITY_DN11581_c0_g1_i4	ko00561	Glycerolipid metabolism	Lipid metabolism
T01-03_TRINITY_DN11581_c0_g1_i4	ko00564	Glycerophospholipid metabolism	Lipid metabolism
T01-03_TRINITY_DN11604_c0_g1_i10	ko00905	Brassinosteroid biosynthesis	Metabolism of terpenoids and polyketides
T01-03_TRINITY_DN11623_c0_g1_i1	ko00905	Brassinosteroid biosynthesis	Metabolism of terpenoids and polyketides
T01-03_TRINITY_DN11647_c0_g1_i2	ko00260	Glycine, serine and threonine metabolism	Amino acid metabolism
T01-03_TRINITY_DN11647_c0_g1_i2	ko00310	Lysine degradation	Amino acid metabolism
T01-03_TRINITY_DN1166_c0_g1_i4	ko00860	Porphyrin metabolism	Metabolism of cofactors and vitamins
T01-03_TRINITY_DN1166_c1_g1_i3	ko00300	Lysine biosynthesis	Amino acid metabolism
T01-03_TRINITY_DN1166_c1_g1_i3	ko00310	Lysine degradation	Amino acid metabolism
T01-03_TRINITY_DN1166_c2_g1_i3	ko00564	Glycerophospholipid metabolism	Lipid metabolism
T01-03_TRINITY_DN1166_c2_g1_i3	ko00592	alpha-Linolenic acid metabolism	Lipid metabolism
T01-03_TRINITY_DN11753_c0_g1_i1	ko00195	Photosynthesis	Energy metabolism
T01-03_TRINITY_DN1176_c0_g1_i24	ko00561	Glycerolipid metabolism	Lipid metabolism
T01-03_TRINITY_DN11770_c0_g1_i10	ko00010	Glycolysis / Gluconeogenesis	Carbohydrate metabolism
T01-03_TRINITY_DN11770_c0_g1_i10	ko00051	Fructose and mannose metabolism	Carbohydrate metabolism
T01-03_TRINITY_DN11770_c0_g1_i10	ko00562	Inositol phosphate metabolism	Carbohydrate metabolism
T01-03_TRINITY_DN11770_c0_g1_i10	ko00710	Carbon fixation in photosynthetic organisms	Energy metabolism
T01-03_TRINITY_DN1178_c0_g1_i9	ko00531	Glycosaminoglycan degradation	Glycan biosynthesis and metabolism
T01-03_TRINITY_DN11825_c0_g1_i2	ko00520	Amino sugar and nucleotide sugar metabolism	Carbohydrate metabolism
T01-03_TRINITY_DN11835_c2_g1_i1	ko00564	Glycerophospholipid metabolism	Lipid metabolism
T01-03_TRINITY_DN11835_c2_g1_i1	ko00565	Ether lipid metabolism	Lipid metabolism
T01-03_TRINITY_DN11837_c0_g2_i1	ko00230	Purine metabolism	Nucleotide metabolism
T01-03_TRINITY_DN11837_c0_g2_i1	ko00240	Pyrimidine metabolism	Nucleotide metabolism
T01-03_TRINITY_DN11854_c0_g1_i10	ko00230	Purine metabolism	Nucleotide metabolism
T01-03_TRINITY_DN11868_c0_g1_i1	ko00330	Arginine and proline metabolism	Amino acid metabolism
T01-03_TRINITY_DN11868_c0_g1_i1	ko00360	Phenylalanine metabolism	Amino acid metabolism
T01-03_TRINITY_DN11868_c0_g1_i1	ko00380	Tryptophan metabolism	Amino acid metabolism
T01-03_TRINITY_DN11868_c0_g1_i1	ko00627	Aminobenzoate degradation	Xenobiotics biodegradation and metabolism
T01-03_TRINITY_DN11868_c0_g1_i1	ko00643	Styrene degradation	Xenobiotics biodegradation and metabolism
T01-03_TRINITY_DN11891_c0_g1_i2	ko00190	Oxidative phosphorylation	Energy metabolism
T01-03_TRINITY_DN11900_c0_g1_i1	ko00195	Photosynthesis	Energy metabolism
T01-03_TRINITY_DN11922_c1_g1_i11	ko00564	Glycerophospholipid metabolism	Lipid metabolism
T01-03_TRINITY_DN11922_c1_g5_i1	ko00564	Glycerophospholipid metabolism	Lipid metabolism
T01-03_TRINITY_DN11964_c0_g1_i1	ko00982	Drug metabolism - cytochrome P450	Xenobiotics biodegradation and metabolism
T01-03_TRINITY_DN11987_c0_g1_i1	ko00260	Glycine, serine and threonine metabolism	Amino acid metabolism
T01-03_TRINITY_DN11987_c0_g1_i1	ko00270	Cysteine and methionine metabolism	Amino acid metabolism
T01-03_TRINITY_DN11987_c0_g1_i1	ko00300	Lysine biosynthesis	Amino acid metabolism
T01-03_TRINITY_DN11987_c0_g1_i1	ko00261	Monobactam biosynthesis	Biosynthesis of other secondary metabolites
T01-03_TRINITY_DN12012_c0_g2_i1	ko00600	Sphingolipid metabolism	Lipid metabolism
T01-03_TRINITY_DN12015_c3_g1_i1	ko00052	Galactose metabolism	Carbohydrate metabolism
T01-03_TRINITY_DN12015_c3_g1_i1	ko00603	Glycosphingolipid biosynthesis - globo and isoglobo series	Glycan biosynthesis and metabolism
T01-03_TRINITY_DN12015_c3_g1_i1	ko00561	Glycerolipid metabolism	Lipid metabolism
T01-03_TRINITY_DN12015_c3_g1_i1	ko00600	Sphingolipid metabolism	Lipid metabolism
T01-03_TRINITY_DN12018_c0_g2_i2	ko00902	Monoterpenoid biosynthesis	Metabolism of terpenoids and polyketides
T01-03_TRINITY_DN12031_c0_g1_i2	ko00940	Phenylpropanoid biosynthesis	Biosynthesis of other secondary metabolites
T01-03_TRINITY_DN1204_c0_g1_i6	ko00563	Glycosylphosphatidylinositol (GPI)-anchor biosynthesis	Glycan biosynthesis and metabolism
T01-03_TRINITY_DN12064_c0_g1_i1	ko00190	Oxidative phosphorylation	Energy metabolism
T01-03_TRINITY_DN12065_c0_g1_i29	ko00900	Terpenoid backbone biosynthesis	Metabolism of terpenoids and polyketides
T01-03_TRINITY_DN12065_c2_g1_i4	ko00561	Glycerolipid metabolism	Lipid metabolism
T01-03_TRINITY_DN12065_c2_g1_i4	ko00564	Glycerophospholipid metabolism	Lipid metabolism
T01-03_TRINITY_DN1208_c0_g1_i3	ko00360	Phenylalanine metabolism	Amino acid metabolism
T01-03_TRINITY_DN1208_c0_g1_i3	ko00940	Phenylpropanoid biosynthesis	Biosynthesis of other secondary metabolites
T01-03_TRINITY_DN12101_c0_g1_i2	ko00071	Fatty acid degradation	Lipid metabolism
T01-03_TRINITY_DN12101_c0_g1_i2	ko00592	alpha-Linolenic acid metabolism	Lipid metabolism
T01-03_TRINITY_DN12101_c0_g1_i2	ko01040	Biosynthesis of unsaturated fatty acids	Lipid metabolism
T01-03_TRINITY_DN12117_c0_g1_i4	ko00860	Porphyrin metabolism	Metabolism of cofactors and vitamins
T01-03_TRINITY_DN12117_c0_g3_i3	ko00860	Porphyrin metabolism	Metabolism of cofactors and vitamins
T01-03_TRINITY_DN12170_c1_g1_i3	ko00512	Mucin type O-glycan biosynthesis	Glycan biosynthesis and metabolism
T01-03_TRINITY_DN12170_c1_g1_i3	ko00533	Glycosaminoglycan biosynthesis - keratan sulfate	Glycan biosynthesis and metabolism
T01-03_TRINITY_DN12170_c1_g1_i3	ko00603	Glycosphingolipid biosynthesis - globo and isoglobo series	Glycan biosynthesis and metabolism
T01-03_TRINITY_DN12170_c1_g1_i3	ko00604	Glycosphingolipid biosynthesis - ganglio series	Glycan biosynthesis and metabolism
T01-03_TRINITY_DN1218_c0_g1_i1	ko00190	Oxidative phosphorylation	Energy metabolism
T01-03_TRINITY_DN1218_c0_g3_i2	ko00190	Oxidative phosphorylation	Energy metabolism
T01-03_TRINITY_DN12188_c0_g1_i4	ko00563	Glycosylphosphatidylinositol (GPI)-anchor biosynthesis	Glycan biosynthesis and metabolism
T01-03_TRINITY_DN12194_c1_g2_i4	ko00520	Amino sugar and nucleotide sugar metabolism	Carbohydrate metabolism
T01-03_TRINITY_DN12221_c0_g1_i3	ko00220	Arginine biosynthesis	Amino acid metabolism
T01-03_TRINITY_DN12239_c0_g1_i2	ko00909	Sesquiterpenoid and triterpenoid biosynthesis	Metabolism of terpenoids and polyketides
T01-03_TRINITY_DN12241_c0_g1_i7	ko00620	Pyruvate metabolism	Carbohydrate metabolism
T01-03_TRINITY_DN12241_c0_g1_i7	ko00710	Carbon fixation in photosynthetic organisms	Energy metabolism
T01-03_TRINITY_DN12253_c1_g1_i1	ko00511	Other glycan degradation	Glycan biosynthesis and metabolism
T01-03_TRINITY_DN12260_c0_g3_i3	ko00670	One carbon pool by folate	Metabolism of cofactors and vitamins
T01-03_TRINITY_DN12273_c0_g1_i1	ko00190	Oxidative phosphorylation	Energy metabolism
T01-03_TRINITY_DN12296_c2_g2_i1	ko00400	Phenylalanine, tyrosine and tryptophan biosynthesis	Amino acid metabolism
T01-03_TRINITY_DN12296_c4_g1_i1	ko00400	Phenylalanine, tyrosine and tryptophan biosynthesis	Amino acid metabolism
T01-03_TRINITY_DN12363_c0_g1_i44	ko00190	Oxidative phosphorylation	Energy metabolism
T01-03_TRINITY_DN12366_c1_g1_i4	ko00260	Glycine, serine and threonine metabolism	Amino acid metabolism
T01-03_TRINITY_DN12366_c1_g1_i4	ko00280	Valine, leucine and isoleucine degradation	Amino acid metabolism
T01-03_TRINITY_DN12366_c1_g1_i4	ko00310	Lysine degradation	Amino acid metabolism
T01-03_TRINITY_DN12366_c1_g1_i4	ko00330	Arginine and proline metabolism	Amino acid metabolism
T01-03_TRINITY_DN12366_c1_g1_i4	ko00340	Histidine metabolism	Amino acid metabolism
T01-03_TRINITY_DN12366_c1_g1_i4	ko00380	Tryptophan metabolism	Amino acid metabolism
T01-03_TRINITY_DN12366_c1_g1_i4	ko00010	Glycolysis / Gluconeogenesis	Carbohydrate metabolism
T01-03_TRINITY_DN12366_c1_g1_i4	ko00053	Ascorbate and aldarate metabolism	Carbohydrate metabolism
T01-03_TRINITY_DN12366_c1_g1_i4	ko00620	Pyruvate metabolism	Carbohydrate metabolism
T01-03_TRINITY_DN12366_c1_g1_i4	ko00071	Fatty acid degradation	Lipid metabolism
T01-03_TRINITY_DN12366_c1_g1_i4	ko00561	Glycerolipid metabolism	Lipid metabolism
T01-03_TRINITY_DN12366_c1_g1_i4	ko00410	beta-Alanine metabolism	Metabolism of other amino acids
T01-03_TRINITY_DN12372_c0_g1_i2	ko00620	Pyruvate metabolism	Carbohydrate metabolism
T01-03_TRINITY_DN12375_c7_g1_i1	ko00052	Galactose metabolism	Carbohydrate metabolism
T01-03_TRINITY_DN12375_c7_g1_i1	ko00500	Starch and sucrose metabolism	Carbohydrate metabolism
T01-03_TRINITY_DN12388_c0_g1_i14	ko00750	Vitamin B6 metabolism	Metabolism of cofactors and vitamins
T01-03_TRINITY_DN12401_c0_g2_i1	ko00780	Biotin metabolism	Metabolism of cofactors and vitamins
T01-03_TRINITY_DN12407_c0_g1_i1	ko00710	Carbon fixation in photosynthetic organisms	Energy metabolism
T01-03_TRINITY_DN12429_c0_g1_i2	ko00740	Riboflavin metabolism	Metabolism of cofactors and vitamins
T01-03_TRINITY_DN12430_c14_g1_i1	ko00860	Porphyrin metabolism	Metabolism of cofactors and vitamins
T01-03_TRINITY_DN12430_c9_g1_i1	ko00232	Caffeine metabolism	Biosynthesis of other secondary metabolites
T01-03_TRINITY_DN12430_c9_g1_i1	ko00230	Purine metabolism	Nucleotide metabolism
T01-03_TRINITY_DN12430_c9_g1_i1	ko00983	Drug metabolism - other enzymes	Xenobiotics biodegradation and metabolism
T01-03_TRINITY_DN12467_c0_g1_i1	ko00073	Cutin, suberine and wax biosynthesis	Lipid metabolism
T01-03_TRINITY_DN1247_c0_g1_i2	ko00500	Starch and sucrose metabolism	Carbohydrate metabolism
T01-03_TRINITY_DN1251_c1_g3_i1	ko00010	Glycolysis / Gluconeogenesis	Carbohydrate metabolism
T01-03_TRINITY_DN1251_c1_g3_i1	ko00680	Methane metabolism	Energy metabolism
T01-03_TRINITY_DN12520_c0_g1_i2	ko00520	Amino sugar and nucleotide sugar metabolism	Carbohydrate metabolism
T01-03_TRINITY_DN12547_c1_g1_i1	ko00073	Cutin, suberine and wax biosynthesis	Lipid metabolism
T01-03_TRINITY_DN12553_c0_g1_i1	ko00053	Ascorbate and aldarate metabolism	Carbohydrate metabolism
T01-03_TRINITY_DN12553_c0_g1_i1	ko00480	Glutathione metabolism	Metabolism of other amino acids
T01-03_TRINITY_DN12580_c0_g1_i3	ko00230	Purine metabolism	Nucleotide metabolism
T01-03_TRINITY_DN12582_c0_g1_i2	ko00051	Fructose and mannose metabolism	Carbohydrate metabolism
T01-03_TRINITY_DN12582_c0_g1_i2	ko00500	Starch and sucrose metabolism	Carbohydrate metabolism
T01-03_TRINITY_DN12582_c0_g1_i2	ko00230	Purine metabolism	Nucleotide metabolism
T01-03_TRINITY_DN12648_c0_g1_i4	ko00900	Terpenoid backbone biosynthesis	Metabolism of terpenoids and polyketides
T01-03_TRINITY_DN12704_c0_g1_i1	ko00250	Alanine, aspartate and glutamate metabolism	Amino acid metabolism
T01-03_TRINITY_DN12704_c0_g1_i1	ko00910	Nitrogen metabolism	Energy metabolism
T01-03_TRINITY_DN12710_c1_g1_i5	ko00908	Zeatin biosynthesis	Metabolism of terpenoids and polyketides
T01-03_TRINITY_DN12744_c1_g2_i1	ko00140	Steroid hormone biosynthesis	Lipid metabolism
T01-03_TRINITY_DN1278_c0_g1_i4	ko00380	Tryptophan metabolism	Amino acid metabolism
T01-03_TRINITY_DN1278_c0_g1_i4	ko00906	Carotenoid biosynthesis	Metabolism of terpenoids and polyketides
T01-03_TRINITY_DN1282_c2_g1_i3	ko00053	Ascorbate and aldarate metabolism	Carbohydrate metabolism
T01-03_TRINITY_DN1282_c2_g1_i3	ko00562	Inositol phosphate metabolism	Carbohydrate metabolism
T01-03_TRINITY_DN12874_c0_g1_i6	ko00562	Inositol phosphate metabolism	Carbohydrate metabolism
T01-03_TRINITY_DN12874_c0_g1_i6	ko00564	Glycerophospholipid metabolism	Lipid metabolism
T01-03_TRINITY_DN12874_c0_g1_i6	ko00565	Ether lipid metabolism	Lipid metabolism
T01-03_TRINITY_DN12887_c0_g2_i1	ko00592	alpha-Linolenic acid metabolism	Lipid metabolism
T01-03_TRINITY_DN1289_c0_g1_i1	ko00190	Oxidative phosphorylation	Energy metabolism
T01-03_TRINITY_DN12890_c0_g1_i1	ko00520	Amino sugar and nucleotide sugar metabolism	Carbohydrate metabolism
T01-03_TRINITY_DN12890_c0_g2_i1	ko00520	Amino sugar and nucleotide sugar metabolism	Carbohydrate metabolism
T01-03_TRINITY_DN12972_c0_g3_i1	ko00900	Terpenoid backbone biosynthesis	Metabolism of terpenoids and polyketides
T01-03_TRINITY_DN12995_c0_g1_i1	ko00630	Glyoxylate and dicarboxylate metabolism	Carbohydrate metabolism
T01-03_TRINITY_DN12995_c0_g1_i1	ko00710	Carbon fixation in photosynthetic organisms	Energy metabolism
T01-03_TRINITY_DN13015_c1_g1_i3	ko00510	N-Glycan biosynthesis	Glycan biosynthesis and metabolism
T01-03_TRINITY_DN13015_c1_g1_i3	ko00513	Various types of N-glycan biosynthesis	Glycan biosynthesis and metabolism
T01-03_TRINITY_DN1303_c0_g1_i6	ko00500	Starch and sucrose metabolism	Carbohydrate metabolism
T01-03_TRINITY_DN13037_c0_g1_i3	ko00940	Phenylpropanoid biosynthesis	Biosynthesis of other secondary metabolites
T01-03_TRINITY_DN1305_c2_g1_i1	ko00051	Fructose and mannose metabolism	Carbohydrate metabolism
T01-03_TRINITY_DN13066_c0_g1_i3	ko00562	Inositol phosphate metabolism	Carbohydrate metabolism
T01-03_TRINITY_DN13123_c0_g1_i3	ko00140	Steroid hormone biosynthesis	Lipid metabolism
T01-03_TRINITY_DN13128_c0_g1_i2	ko00520	Amino sugar and nucleotide sugar metabolism	Carbohydrate metabolism
T01-03_TRINITY_DN13128_c0_g2_i1	ko00520	Amino sugar and nucleotide sugar metabolism	Carbohydrate metabolism
T01-03_TRINITY_DN1317_c0_g1_i2	ko00480	Glutathione metabolism	Metabolism of other amino acids
T01-03_TRINITY_DN1317_c0_g1_i2	ko00230	Purine metabolism	Nucleotide metabolism
T01-03_TRINITY_DN1317_c0_g1_i2	ko00240	Pyrimidine metabolism	Nucleotide metabolism
T01-03_TRINITY_DN1317_c0_g1_i2	ko00983	Drug metabolism - other enzymes	Xenobiotics biodegradation and metabolism
T01-03_TRINITY_DN13178_c0_g1_i5	ko00860	Porphyrin metabolism	Metabolism of cofactors and vitamins
T01-03_TRINITY_DN13188_c0_g1_i2	ko00860	Porphyrin metabolism	Metabolism of cofactors and vitamins
T01-03_TRINITY_DN13189_c1_g1_i1	ko00510	N-Glycan biosynthesis	Glycan biosynthesis and metabolism
T01-03_TRINITY_DN13189_c1_g1_i1	ko00513	Various types of N-glycan biosynthesis	Glycan biosynthesis and metabolism
T01-03_TRINITY_DN13193_c0_g1_i1	ko00195	Photosynthesis	Energy metabolism
T01-03_TRINITY_DN1320_c1_g3_i5	ko00270	Cysteine and methionine metabolism	Amino acid metabolism
T01-03_TRINITY_DN1320_c1_g3_i5	ko00920	Sulfur metabolism	Energy metabolism
T01-03_TRINITY_DN1322_c8_g1_i1	ko00360	Phenylalanine metabolism	Amino acid metabolism
T01-03_TRINITY_DN1322_c8_g1_i1	ko00940	Phenylpropanoid biosynthesis	Biosynthesis of other secondary metabolites
T01-03_TRINITY_DN13246_c0_g1_i1	ko00785	Lipoic acid metabolism	Metabolism of cofactors and vitamins
T01-03_TRINITY_DN13257_c0_g1_i2	ko00900	Terpenoid backbone biosynthesis	Metabolism of terpenoids and polyketides
T01-03_TRINITY_DN1326_c2_g1_i4	ko00040	Pentose and glucuronate interconversions	Carbohydrate metabolism
T01-03_TRINITY_DN1328_c0_g1_i1	ko00230	Purine metabolism	Nucleotide metabolism
T01-03_TRINITY_DN1328_c0_g1_i1	ko00240	Pyrimidine metabolism	Nucleotide metabolism
T01-03_TRINITY_DN13285_c0_g1_i13	ko00563	Glycosylphosphatidylinositol (GPI)-anchor biosynthesis	Glycan biosynthesis and metabolism
T01-03_TRINITY_DN13294_c0_g1_i14	ko00561	Glycerolipid metabolism	Lipid metabolism
T01-03_TRINITY_DN13294_c5_g1_i1	ko00908	Zeatin biosynthesis	Metabolism of terpenoids and polyketides
T01-03_TRINITY_DN1330_c0_g1_i3	ko00140	Steroid hormone biosynthesis	Lipid metabolism
T01-03_TRINITY_DN13318_c0_g2_i1	ko00190	Oxidative phosphorylation	Energy metabolism
T01-03_TRINITY_DN1333_c1_g1_i22	ko00010	Glycolysis / Gluconeogenesis	Carbohydrate metabolism
T01-03_TRINITY_DN1333_c1_g1_i22	ko00710	Carbon fixation in photosynthetic organisms	Energy metabolism
T01-03_TRINITY_DN13347_c0_g1_i12	ko00190	Oxidative phosphorylation	Energy metabolism
T01-03_TRINITY_DN1336_c2_g1_i2	ko00562	Inositol phosphate metabolism	Carbohydrate metabolism
T01-03_TRINITY_DN13371_c0_g1_i1	ko00030	Pentose phosphate pathway	Carbohydrate metabolism
T01-03_TRINITY_DN13371_c0_g1_i1	ko00710	Carbon fixation in photosynthetic organisms	Energy metabolism
T01-03_TRINITY_DN13371_c0_g1_i1	ko01051	Biosynthesis of ansamycins	Metabolism of terpenoids and polyketides
T01-03_TRINITY_DN13414_c1_g1_i4	ko00520	Amino sugar and nucleotide sugar metabolism	Carbohydrate metabolism
T01-03_TRINITY_DN13416_c0_g1_i1	ko00730	Thiamine metabolism	Metabolism of cofactors and vitamins
T01-03_TRINITY_DN13416_c0_g1_i1	ko00900	Terpenoid backbone biosynthesis	Metabolism of terpenoids and polyketides
T01-03_TRINITY_DN1344_c1_g1_i2	ko00500	Starch and sucrose metabolism	Carbohydrate metabolism
T01-03_TRINITY_DN13454_c1_g1_i1	ko00073	Cutin, suberine and wax biosynthesis	Lipid metabolism
T01-03_TRINITY_DN13468_c0_g1_i1	ko00230	Purine metabolism	Nucleotide metabolism
T01-03_TRINITY_DN13468_c0_g1_i1	ko00240	Pyrimidine metabolism	Nucleotide metabolism
T01-03_TRINITY_DN13483_c0_g1_i7	ko00564	Glycerophospholipid metabolism	Lipid metabolism
T01-03_TRINITY_DN13483_c0_g1_i7	ko00565	Ether lipid metabolism	Lipid metabolism
T01-03_TRINITY_DN13491_c0_g1_i1	ko00051	Fructose and mannose metabolism	Carbohydrate metabolism
T01-03_TRINITY_DN13515_c3_g1_i1	ko00270	Cysteine and methionine metabolism	Amino acid metabolism
T01-03_TRINITY_DN13515_c3_g1_i1	ko00330	Arginine and proline metabolism	Amino acid metabolism
T01-03_TRINITY_DN13515_c3_g1_i1	ko00410	beta-Alanine metabolism	Metabolism of other amino acids
T01-03_TRINITY_DN13515_c3_g1_i1	ko00480	Glutathione metabolism	Metabolism of other amino acids
T01-03_TRINITY_DN13572_c0_g1_i3	ko00040	Pentose and glucuronate interconversions	Carbohydrate metabolism
T01-03_TRINITY_DN13575_c0_g1_i1	ko00905	Brassinosteroid biosynthesis	Metabolism of terpenoids and polyketides
T01-03_TRINITY_DN13577_c0_g1_i1	ko00010	Glycolysis / Gluconeogenesis	Carbohydrate metabolism
T01-03_TRINITY_DN13577_c0_g1_i1	ko00620	Pyruvate metabolism	Carbohydrate metabolism
T01-03_TRINITY_DN13577_c0_g1_i1	ko00230	Purine metabolism	Nucleotide metabolism
T01-03_TRINITY_DN13588_c0_g1_i1	ko00195	Photosynthesis	Energy metabolism
T01-03_TRINITY_DN13624_c0_g1_i1	ko00785	Lipoic acid metabolism	Metabolism of cofactors and vitamins
T01-03_TRINITY_DN1364_c4_g1_i1	ko00140	Steroid hormone biosynthesis	Lipid metabolism
T01-03_TRINITY_DN13653_c0_g1_i6	ko00280	Valine, leucine and isoleucine degradation	Amino acid metabolism
T01-03_TRINITY_DN13653_c0_g1_i6	ko00310	Lysine degradation	Amino acid metabolism
T01-03_TRINITY_DN13653_c0_g1_i6	ko00330	Arginine and proline metabolism	Amino acid metabolism
T01-03_TRINITY_DN13653_c0_g1_i6	ko00340	Histidine metabolism	Amino acid metabolism
T01-03_TRINITY_DN13653_c0_g1_i6	ko00380	Tryptophan metabolism	Amino acid metabolism
T01-03_TRINITY_DN13653_c0_g1_i6	ko00010	Glycolysis / Gluconeogenesis	Carbohydrate metabolism
T01-03_TRINITY_DN13653_c0_g1_i6	ko00053	Ascorbate and aldarate metabolism	Carbohydrate metabolism
T01-03_TRINITY_DN13653_c0_g1_i6	ko00620	Pyruvate metabolism	Carbohydrate metabolism
T01-03_TRINITY_DN13653_c0_g1_i6	ko00071	Fatty acid degradation	Lipid metabolism
T01-03_TRINITY_DN13653_c0_g1_i6	ko00561	Glycerolipid metabolism	Lipid metabolism
T01-03_TRINITY_DN13653_c0_g1_i6	ko00410	beta-Alanine metabolism	Metabolism of other amino acids
T01-03_TRINITY_DN13653_c0_g1_i6	ko00903	Limonene and pinene degradation	Metabolism of terpenoids and polyketides
T01-03_TRINITY_DN13653_c0_g1_i6	ko00981	Insect hormone biosynthesis	Metabolism of terpenoids and polyketides
T01-03_TRINITY_DN13653_c0_g1_i6	ko00625	Chloroalkane and chloroalkene degradation	Xenobiotics biodegradation and metabolism
T01-03_TRINITY_DN13697_c0_g1_i6	ko00333	Prodigiosin biosynthesis	Biosynthesis of other secondary metabolites
T01-03_TRINITY_DN13697_c0_g1_i6	ko00061	Fatty acid biosynthesis	Lipid metabolism
T01-03_TRINITY_DN13697_c0_g1_i6	ko01040	Biosynthesis of unsaturated fatty acids	Lipid metabolism
T01-03_TRINITY_DN13697_c0_g1_i6	ko00780	Biotin metabolism	Metabolism of cofactors and vitamins
T01-03_TRINITY_DN13697_c2_g1_i1	ko00260	Glycine, serine and threonine metabolism	Amino acid metabolism
T01-03_TRINITY_DN13697_c2_g1_i1	ko00350	Tyrosine metabolism	Amino acid metabolism
T01-03_TRINITY_DN13697_c2_g1_i1	ko00360	Phenylalanine metabolism	Amino acid metabolism
T01-03_TRINITY_DN13697_c2_g1_i1	ko00950	Isoquinoline alkaloid biosynthesis	Biosynthesis of other secondary metabolites
T01-03_TRINITY_DN13697_c2_g1_i1	ko00960	Tropane, piperidine and pyridine alkaloid biosynthesis	Biosynthesis of other secondary metabolites
T01-03_TRINITY_DN13697_c2_g1_i1	ko00410	beta-Alanine metabolism	Metabolism of other amino acids
T01-03_TRINITY_DN13698_c0_g1_i1	ko00904	Diterpenoid biosynthesis	Metabolism of terpenoids and polyketides
T01-03_TRINITY_DN13712_c0_g1_i1	ko00230	Purine metabolism	Nucleotide metabolism
T01-03_TRINITY_DN13712_c0_g1_i1	ko00240	Pyrimidine metabolism	Nucleotide metabolism
T01-03_TRINITY_DN13716_c0_g1_i1	ko00300	Lysine biosynthesis	Amino acid metabolism
T01-03_TRINITY_DN13716_c0_g2_i1	ko00300	Lysine biosynthesis	Amino acid metabolism
T01-03_TRINITY_DN13750_c0_g3_i4	ko00195	Photosynthesis	Energy metabolism
T01-03_TRINITY_DN1376_c2_g1_i1	ko00592	alpha-Linolenic acid metabolism	Lipid metabolism
T01-03_TRINITY_DN1386_c2_g1_i1	ko00052	Galactose metabolism	Carbohydrate metabolism
T01-03_TRINITY_DN1386_c2_g1_i1	ko00520	Amino sugar and nucleotide sugar metabolism	Carbohydrate metabolism
T01-03_TRINITY_DN1386_c2_g2_i2	ko00052	Galactose metabolism	Carbohydrate metabolism
T01-03_TRINITY_DN1386_c2_g2_i2	ko00520	Amino sugar and nucleotide sugar metabolism	Carbohydrate metabolism
T01-03_TRINITY_DN13885_c0_g1_i1	ko00940	Phenylpropanoid biosynthesis	Biosynthesis of other secondary metabolites
T01-03_TRINITY_DN13893_c0_g1_i1	ko00500	Starch and sucrose metabolism	Carbohydrate metabolism
T01-03_TRINITY_DN13896_c0_g1_i1	ko00260	Glycine, serine and threonine metabolism	Amino acid metabolism
T01-03_TRINITY_DN13896_c0_g1_i1	ko00680	Methane metabolism	Energy metabolism
T01-03_TRINITY_DN13954_c0_g2_i7	ko00514	Other types of O-glycan biosynthesis	Glycan biosynthesis and metabolism
T01-03_TRINITY_DN1396_c0_g1_i6	ko00270	Cysteine and methionine metabolism	Amino acid metabolism
T01-03_TRINITY_DN1396_c0_g1_i6	ko00920	Sulfur metabolism	Energy metabolism
T01-03_TRINITY_DN1396_c0_g3_i8	ko00270	Cysteine and methionine metabolism	Amino acid metabolism
T01-03_TRINITY_DN1396_c0_g3_i8	ko00920	Sulfur metabolism	Energy metabolism
T01-03_TRINITY_DN13968_c1_g1_i3	ko00860	Porphyrin metabolism	Metabolism of cofactors and vitamins
T01-03_TRINITY_DN13968_c1_g1_i3	ko00900	Terpenoid backbone biosynthesis	Metabolism of terpenoids and polyketides
T01-03_TRINITY_DN14024_c0_g2_i1	ko00600	Sphingolipid metabolism	Lipid metabolism
T01-03_TRINITY_DN1405_c0_g1_i3	ko00562	Inositol phosphate metabolism	Carbohydrate metabolism
T01-03_TRINITY_DN14072_c0_g1_i2	ko00330	Arginine and proline metabolism	Amino acid metabolism
T01-03_TRINITY_DN14073_c0_g1_i1	ko00940	Phenylpropanoid biosynthesis	Biosynthesis of other secondary metabolites
T01-03_TRINITY_DN14076_c0_g1_i1	ko00010	Glycolysis / Gluconeogenesis	Carbohydrate metabolism
T01-03_TRINITY_DN14076_c0_g1_i1	ko00030	Pentose phosphate pathway	Carbohydrate metabolism
T01-03_TRINITY_DN14076_c0_g1_i1	ko00500	Starch and sucrose metabolism	Carbohydrate metabolism
T01-03_TRINITY_DN14076_c0_g1_i1	ko00520	Amino sugar and nucleotide sugar metabolism	Carbohydrate metabolism
T01-03_TRINITY_DN14079_c1_g2_i1	ko00906	Carotenoid biosynthesis	Metabolism of terpenoids and polyketides
T01-03_TRINITY_DN1409_c0_g1_i24	ko00562	Inositol phosphate metabolism	Carbohydrate metabolism
T01-03_TRINITY_DN14114_c0_g1_i2	ko00920	Sulfur metabolism	Energy metabolism
T01-03_TRINITY_DN14118_c0_g1_i1	ko00531	Glycosaminoglycan degradation	Glycan biosynthesis and metabolism
T01-03_TRINITY_DN1413_c0_g1_i2	ko00730	Thiamine metabolism	Metabolism of cofactors and vitamins
T01-03_TRINITY_DN1413_c0_g1_i2	ko00230	Purine metabolism	Nucleotide metabolism
T01-03_TRINITY_DN1413_c0_g2_i1	ko00730	Thiamine metabolism	Metabolism of cofactors and vitamins
T01-03_TRINITY_DN1413_c0_g2_i1	ko00230	Purine metabolism	Nucleotide metabolism
T01-03_TRINITY_DN14141_c1_g1_i1	ko00561	Glycerolipid metabolism	Lipid metabolism
T01-03_TRINITY_DN14149_c0_g1_i4	ko00510	N-Glycan biosynthesis	Glycan biosynthesis and metabolism
T01-03_TRINITY_DN14149_c0_g1_i4	ko00513	Various types of N-glycan biosynthesis	Glycan biosynthesis and metabolism
T01-03_TRINITY_DN1415_c0_g1_i8	ko00562	Inositol phosphate metabolism	Carbohydrate metabolism
T01-03_TRINITY_DN1417_c0_g2_i1	ko00260	Glycine, serine and threonine metabolism	Amino acid metabolism
T01-03_TRINITY_DN1417_c0_g2_i1	ko00630	Glyoxylate and dicarboxylate metabolism	Carbohydrate metabolism
T01-03_TRINITY_DN1417_c0_g2_i1	ko00680	Methane metabolism	Energy metabolism
T01-03_TRINITY_DN1417_c0_g2_i1	ko00670	One carbon pool by folate	Metabolism of cofactors and vitamins
T01-03_TRINITY_DN1417_c0_g2_i1	ko00460	Cyanoamino acid metabolism	Metabolism of other amino acids
T01-03_TRINITY_DN142_c0_g2_i1	ko00730	Thiamine metabolism	Metabolism of cofactors and vitamins
T01-03_TRINITY_DN142_c0_g2_i1	ko00230	Purine metabolism	Nucleotide metabolism
T01-03_TRINITY_DN14204_c0_g1_i1	ko00430	Taurine and hypotaurine metabolism	Metabolism of other amino acids
T01-03_TRINITY_DN14204_c0_g3_i1	ko00430	Taurine and hypotaurine metabolism	Metabolism of other amino acids
T01-03_TRINITY_DN14217_c0_g1_i1	ko00270	Cysteine and methionine metabolism	Amino acid metabolism
T01-03_TRINITY_DN14217_c0_g1_i1	ko00920	Sulfur metabolism	Energy metabolism
T01-03_TRINITY_DN1422_c0_g1_i1	ko00051	Fructose and mannose metabolism	Carbohydrate metabolism
T01-03_TRINITY_DN14268_c0_g2_i1	ko00520	Amino sugar and nucleotide sugar metabolism	Carbohydrate metabolism
T01-03_TRINITY_DN14279_c0_g1_i5	ko00230	Purine metabolism	Nucleotide metabolism
T01-03_TRINITY_DN14279_c0_g1_i5	ko00240	Pyrimidine metabolism	Nucleotide metabolism
T01-03_TRINITY_DN1429_c0_g1_i20	ko00290	Valine, leucine and isoleucine biosynthesis	Amino acid metabolism
T01-03_TRINITY_DN1429_c0_g1_i20	ko00966	Glucosinolate biosynthesis	Biosynthesis of other secondary metabolites
T01-03_TRINITY_DN1429_c0_g1_i20	ko00660	C5-Branched dibasic acid metabolism	Carbohydrate metabolism
T01-03_TRINITY_DN1430_c1_g1_i14	ko00770	Pantothenate and CoA biosynthesis	Metabolism of cofactors and vitamins
T01-03_TRINITY_DN14321_c0_g1_i1	ko00062	Fatty acid elongation	Lipid metabolism
T01-03_TRINITY_DN14333_c0_g1_i9	ko00620	Pyruvate metabolism	Carbohydrate metabolism
T01-03_TRINITY_DN14338_c0_g2_i2	ko00330	Arginine and proline metabolism	Amino acid metabolism
T01-03_TRINITY_DN14338_c0_g2_i2	ko00410	beta-Alanine metabolism	Metabolism of other amino acids
T01-03_TRINITY_DN14341_c0_g1_i2	ko00532	Glycosaminoglycan biosynthesis - chondroitin sulfate / dermatan sulfate	Glycan biosynthesis and metabolism
T01-03_TRINITY_DN14341_c0_g1_i2	ko00534	Glycosaminoglycan biosynthesis - heparan sulfate / heparin	Glycan biosynthesis and metabolism
T01-03_TRINITY_DN1435_c1_g1_i1	ko00073	Cutin, suberine and wax biosynthesis	Lipid metabolism
T01-03_TRINITY_DN14359_c0_g2_i1	ko00010	Glycolysis / Gluconeogenesis	Carbohydrate metabolism
T01-03_TRINITY_DN14359_c0_g2_i1	ko00620	Pyruvate metabolism	Carbohydrate metabolism
T01-03_TRINITY_DN14359_c0_g2_i1	ko00230	Purine metabolism	Nucleotide metabolism
T01-03_TRINITY_DN14369_c0_g1_i54	ko00280	Valine, leucine and isoleucine degradation	Amino acid metabolism
T01-03_TRINITY_DN1437_c1_g1_i5	ko00360	Phenylalanine metabolism	Amino acid metabolism
T01-03_TRINITY_DN1437_c1_g1_i5	ko00650	Butanoate metabolism	Carbohydrate metabolism
T01-03_TRINITY_DN1437_c1_g1_i5	ko00362	Benzoate degradation	Xenobiotics biodegradation and metabolism
T01-03_TRINITY_DN14371_c0_g1_i2	ko00940	Phenylpropanoid biosynthesis	Biosynthesis of other secondary metabolites
T01-03_TRINITY_DN14374_c0_g1_i1	ko00040	Pentose and glucuronate interconversions	Carbohydrate metabolism
T01-03_TRINITY_DN1438_c0_g1_i11	ko00520	Amino sugar and nucleotide sugar metabolism	Carbohydrate metabolism
T01-03_TRINITY_DN1438_c0_g2_i6	ko00520	Amino sugar and nucleotide sugar metabolism	Carbohydrate metabolism
T01-03_TRINITY_DN14395_c0_g1_i2	ko00510	N-Glycan biosynthesis	Glycan biosynthesis and metabolism
T01-03_TRINITY_DN1441_c0_g1_i2	ko00590	Arachidonic acid metabolism	Lipid metabolism
T01-03_TRINITY_DN14416_c0_g1_i2	ko00510	N-Glycan biosynthesis	Glycan biosynthesis and metabolism
T01-03_TRINITY_DN14416_c0_g1_i2	ko00513	Various types of N-glycan biosynthesis	Glycan biosynthesis and metabolism
T01-03_TRINITY_DN14437_c0_g1_i1	ko00941	Flavonoid biosynthesis	Biosynthesis of other secondary metabolites
T01-03_TRINITY_DN1445_c0_g1_i9	ko00270	Cysteine and methionine metabolism	Amino acid metabolism
T01-03_TRINITY_DN1445_c0_g1_i9	ko00330	Arginine and proline metabolism	Amino acid metabolism
T01-03_TRINITY_DN1445_c0_g1_i9	ko00410	beta-Alanine metabolism	Metabolism of other amino acids
T01-03_TRINITY_DN1445_c0_g1_i9	ko00480	Glutathione metabolism	Metabolism of other amino acids
T01-03_TRINITY_DN1453_c1_g1_i12	ko00982	Drug metabolism - cytochrome P450	Xenobiotics biodegradation and metabolism
T01-03_TRINITY_DN14538_c0_g2_i3	ko00010	Glycolysis / Gluconeogenesis	Carbohydrate metabolism
T01-03_TRINITY_DN14554_c1_g1_i2	ko00510	N-Glycan biosynthesis	Glycan biosynthesis and metabolism
T01-03_TRINITY_DN14554_c1_g1_i2	ko00513	Various types of N-glycan biosynthesis	Glycan biosynthesis and metabolism
T01-03_TRINITY_DN14566_c0_g1_i8	ko00909	Sesquiterpenoid and triterpenoid biosynthesis	Metabolism of terpenoids and polyketides
T01-03_TRINITY_DN14600_c2_g1_i2	ko00500	Starch and sucrose metabolism	Carbohydrate metabolism
T01-03_TRINITY_DN14651_c0_g1_i2	ko00940	Phenylpropanoid biosynthesis	Biosynthesis of other secondary metabolites
T01-03_TRINITY_DN14651_c0_g1_i2	ko00500	Starch and sucrose metabolism	Carbohydrate metabolism
T01-03_TRINITY_DN14651_c0_g1_i2	ko00460	Cyanoamino acid metabolism	Metabolism of other amino acids
T01-03_TRINITY_DN14676_c0_g1_i2	ko00052	Galactose metabolism	Carbohydrate metabolism
T01-03_TRINITY_DN1469_c2_g1_i1	ko00670	One carbon pool by folate	Metabolism of cofactors and vitamins
T01-03_TRINITY_DN1470_c0_g2_i1	ko00195	Photosynthesis	Energy metabolism
T01-03_TRINITY_DN14701_c0_g1_i9	ko00562	Inositol phosphate metabolism	Carbohydrate metabolism
T01-03_TRINITY_DN14769_c0_g1_i1	ko00380	Tryptophan metabolism	Amino acid metabolism
T01-03_TRINITY_DN14769_c0_g1_i1	ko00140	Steroid hormone biosynthesis	Lipid metabolism
T01-03_TRINITY_DN14769_c0_g1_i1	ko00830	Retinol metabolism	Metabolism of cofactors and vitamins
T01-03_TRINITY_DN14769_c0_g1_i1	ko00980	Metabolism of xenobiotics by cytochrome P450	Xenobiotics biodegradation and metabolism
T01-03_TRINITY_DN1480_c0_g1_i13	ko00190	Oxidative phosphorylation	Energy metabolism
T01-03_TRINITY_DN1481_c0_g1_i6	ko00140	Steroid hormone biosynthesis	Lipid metabolism
T01-03_TRINITY_DN1481_c0_g1_i6	ko00905	Brassinosteroid biosynthesis	Metabolism of terpenoids and polyketides
T01-03_TRINITY_DN1487_c0_g1_i8	ko00310	Lysine degradation	Amino acid metabolism
T01-03_TRINITY_DN14935_c0_g2_i1	ko00600	Sphingolipid metabolism	Lipid metabolism
T01-03_TRINITY_DN1494_c0_g1_i3	ko00230	Purine metabolism	Nucleotide metabolism
T01-03_TRINITY_DN1494_c0_g1_i3	ko00240	Pyrimidine metabolism	Nucleotide metabolism
T01-03_TRINITY_DN14986_c0_g1_i2	ko00010	Glycolysis / Gluconeogenesis	Carbohydrate metabolism
T01-03_TRINITY_DN14986_c0_g1_i2	ko00040	Pentose and glucuronate interconversions	Carbohydrate metabolism
T01-03_TRINITY_DN14986_c0_g1_i2	ko00561	Glycerolipid metabolism	Lipid metabolism
T01-03_TRINITY_DN14986_c0_g1_i2	ko00930	Caprolactam degradation	Xenobiotics biodegradation and metabolism
T01-03_TRINITY_DN15035_c0_g1_i19	ko00010	Glycolysis / Gluconeogenesis	Carbohydrate metabolism
T01-03_TRINITY_DN15035_c0_g1_i19	ko00030	Pentose phosphate pathway	Carbohydrate metabolism
T01-03_TRINITY_DN15035_c0_g1_i19	ko00051	Fructose and mannose metabolism	Carbohydrate metabolism
T01-03_TRINITY_DN15035_c0_g1_i19	ko00052	Galactose metabolism	Carbohydrate metabolism
T01-03_TRINITY_DN15035_c0_g1_i19	ko00680	Methane metabolism	Energy metabolism
T01-03_TRINITY_DN1505_c0_g1_i3	ko00260	Glycine, serine and threonine metabolism	Amino acid metabolism
T01-03_TRINITY_DN1505_c0_g1_i3	ko00270	Cysteine and methionine metabolism	Amino acid metabolism
T01-03_TRINITY_DN1505_c0_g1_i3	ko00300	Lysine biosynthesis	Amino acid metabolism
T01-03_TRINITY_DN1505_c0_g1_i3	ko00261	Monobactam biosynthesis	Biosynthesis of other secondary metabolites
T01-03_TRINITY_DN15053_c0_g1_i5	ko00010	Glycolysis / Gluconeogenesis	Carbohydrate metabolism
T01-03_TRINITY_DN15053_c0_g1_i5	ko00620	Pyruvate metabolism	Carbohydrate metabolism
T01-03_TRINITY_DN15053_c0_g1_i5	ko00640	Propanoate metabolism	Carbohydrate metabolism
T01-03_TRINITY_DN15053_c0_g1_i5	ko00680	Methane metabolism	Energy metabolism
T01-03_TRINITY_DN15053_c0_g1_i5	ko00720	Carbon fixation pathways in prokaryotes	Energy metabolism
T01-03_TRINITY_DN15083_c0_g1_i1	ko00740	Riboflavin metabolism	Metabolism of cofactors and vitamins
T01-03_TRINITY_DN15127_c0_g4_i1	ko00020	Citrate cycle (TCA cycle)	Carbohydrate metabolism
T01-03_TRINITY_DN15127_c0_g4_i1	ko00720	Carbon fixation pathways in prokaryotes	Energy metabolism
T01-03_TRINITY_DN15146_c0_g2_i1	ko00590	Arachidonic acid metabolism	Lipid metabolism
T01-03_TRINITY_DN15146_c0_g2_i1	ko00625	Chloroalkane and chloroalkene degradation	Xenobiotics biodegradation and metabolism
T01-03_TRINITY_DN15280_c0_g1_i1	ko00514	Other types of O-glycan biosynthesis	Glycan biosynthesis and metabolism
T01-03_TRINITY_DN15315_c0_g1_i3	ko00600	Sphingolipid metabolism	Lipid metabolism
T01-03_TRINITY_DN15316_c0_g1_i1	ko00010	Glycolysis / Gluconeogenesis	Carbohydrate metabolism
T01-03_TRINITY_DN15316_c0_g1_i1	ko00030	Pentose phosphate pathway	Carbohydrate metabolism
T01-03_TRINITY_DN15316_c0_g1_i1	ko00051	Fructose and mannose metabolism	Carbohydrate metabolism
T01-03_TRINITY_DN15316_c0_g1_i1	ko00680	Methane metabolism	Energy metabolism
T01-03_TRINITY_DN15316_c0_g1_i1	ko00710	Carbon fixation in photosynthetic organisms	Energy metabolism
T01-03_TRINITY_DN1534_c1_g1_i21	ko00260	Glycine, serine and threonine metabolism	Amino acid metabolism
T01-03_TRINITY_DN1534_c1_g1_i21	ko00270	Cysteine and methionine metabolism	Amino acid metabolism
T01-03_TRINITY_DN1534_c1_g1_i21	ko00300	Lysine biosynthesis	Amino acid metabolism
T01-03_TRINITY_DN1534_c1_g1_i21	ko00261	Monobactam biosynthesis	Biosynthesis of other secondary metabolites
T01-03_TRINITY_DN1544_c0_g1_i6	ko00140	Steroid hormone biosynthesis	Lipid metabolism
T01-03_TRINITY_DN1544_c0_g1_i6	ko00460	Cyanoamino acid metabolism	Metabolism of other amino acids
T01-03_TRINITY_DN15441_c0_g1_i5	ko00380	Tryptophan metabolism	Amino acid metabolism
T01-03_TRINITY_DN15441_c0_g1_i5	ko00140	Steroid hormone biosynthesis	Lipid metabolism
T01-03_TRINITY_DN15441_c0_g1_i5	ko00830	Retinol metabolism	Metabolism of cofactors and vitamins
T01-03_TRINITY_DN15441_c0_g1_i5	ko00980	Metabolism of xenobiotics by cytochrome P450	Xenobiotics biodegradation and metabolism
T01-03_TRINITY_DN15457_c0_g2_i2	ko00730	Thiamine metabolism	Metabolism of cofactors and vitamins
T01-03_TRINITY_DN1548_c0_g1_i26	ko00400	Phenylalanine, tyrosine and tryptophan biosynthesis	Amino acid metabolism
T01-03_TRINITY_DN15483_c0_g1_i3	ko00230	Purine metabolism	Nucleotide metabolism
T01-03_TRINITY_DN15492_c0_g1_i3	ko00350	Tyrosine metabolism	Amino acid metabolism
T01-03_TRINITY_DN15492_c0_g1_i3	ko00360	Phenylalanine metabolism	Amino acid metabolism
T01-03_TRINITY_DN15492_c0_g1_i3	ko00380	Tryptophan metabolism	Amino acid metabolism
T01-03_TRINITY_DN15492_c0_g1_i3	ko00901	Indole alkaloid biosynthesis	Biosynthesis of other secondary metabolites
T01-03_TRINITY_DN15492_c0_g1_i3	ko00950	Isoquinoline alkaloid biosynthesis	Biosynthesis of other secondary metabolites
T01-03_TRINITY_DN15492_c0_g1_i3	ko00965	Betalain biosynthesis	Biosynthesis of other secondary metabolites
T01-03_TRINITY_DN15610_c0_g1_i1	ko00040	Pentose and glucuronate interconversions	Carbohydrate metabolism
T01-03_TRINITY_DN15623_c0_g2_i1	ko00195	Photosynthesis	Energy metabolism
T01-03_TRINITY_DN15625_c4_g1_i1	ko00051	Fructose and mannose metabolism	Carbohydrate metabolism
T01-03_TRINITY_DN15636_c0_g1_i1	ko00250	Alanine, aspartate and glutamate metabolism	Amino acid metabolism
T01-03_TRINITY_DN15636_c0_g1_i1	ko00650	Butanoate metabolism	Carbohydrate metabolism
T01-03_TRINITY_DN15636_c0_g1_i1	ko00410	beta-Alanine metabolism	Metabolism of other amino acids
T01-03_TRINITY_DN15636_c0_g1_i1	ko00430	Taurine and hypotaurine metabolism	Metabolism of other amino acids
T01-03_TRINITY_DN15669_c5_g1_i1	ko00330	Arginine and proline metabolism	Amino acid metabolism
T01-03_TRINITY_DN15669_c5_g1_i1	ko00360	Phenylalanine metabolism	Amino acid metabolism
T01-03_TRINITY_DN15669_c5_g1_i1	ko00380	Tryptophan metabolism	Amino acid metabolism
T01-03_TRINITY_DN15669_c5_g1_i1	ko00627	Aminobenzoate degradation	Xenobiotics biodegradation and metabolism
T01-03_TRINITY_DN15669_c5_g1_i1	ko00643	Styrene degradation	Xenobiotics biodegradation and metabolism
T01-03_TRINITY_DN15673_c0_g1_i1	ko00071	Fatty acid degradation	Lipid metabolism
T01-03_TRINITY_DN15673_c0_g1_i1	ko00592	alpha-Linolenic acid metabolism	Lipid metabolism
T01-03_TRINITY_DN15673_c0_g1_i1	ko01040	Biosynthesis of unsaturated fatty acids	Lipid metabolism
T01-03_TRINITY_DN15674_c0_g1_i1	ko00040	Pentose and glucuronate interconversions	Carbohydrate metabolism
T01-03_TRINITY_DN15674_c0_g1_i1	ko00053	Ascorbate and aldarate metabolism	Carbohydrate metabolism
T01-03_TRINITY_DN15674_c0_g1_i1	ko00520	Amino sugar and nucleotide sugar metabolism	Carbohydrate metabolism
T01-03_TRINITY_DN15687_c0_g1_i4	ko00860	Porphyrin metabolism	Metabolism of cofactors and vitamins
T01-03_TRINITY_DN157_c10_g1_i2	ko00790	Folate biosynthesis	Metabolism of cofactors and vitamins
T01-03_TRINITY_DN15707_c0_g2_i1	ko00514	Other types of O-glycan biosynthesis	Glycan biosynthesis and metabolism
T01-03_TRINITY_DN15718_c0_g1_i1	ko00561	Glycerolipid metabolism	Lipid metabolism
T01-03_TRINITY_DN15718_c0_g1_i1	ko00564	Glycerophospholipid metabolism	Lipid metabolism
T01-03_TRINITY_DN15731_c1_g1_i1	ko00564	Glycerophospholipid metabolism	Lipid metabolism
T01-03_TRINITY_DN1574_c0_g1_i6	ko00330	Arginine and proline metabolism	Amino acid metabolism
T01-03_TRINITY_DN1584_c0_g1_i5	ko00400	Phenylalanine, tyrosine and tryptophan biosynthesis	Amino acid metabolism
T01-03_TRINITY_DN15853_c0_g2_i1	ko00561	Glycerolipid metabolism	Lipid metabolism
T01-03_TRINITY_DN15853_c0_g2_i1	ko00830	Retinol metabolism	Metabolism of cofactors and vitamins
T01-03_TRINITY_DN15870_c0_g1_i3	ko00310	Lysine degradation	Amino acid metabolism
T01-03_TRINITY_DN15877_c0_g1_i2	ko00940	Phenylpropanoid biosynthesis	Biosynthesis of other secondary metabolites
T01-03_TRINITY_DN1600_c0_g1_i3	ko00230	Purine metabolism	Nucleotide metabolism
T01-03_TRINITY_DN1600_c0_g1_i3	ko00240	Pyrimidine metabolism	Nucleotide metabolism
T01-03_TRINITY_DN16000_c0_g2_i1	ko00240	Pyrimidine metabolism	Nucleotide metabolism
T01-03_TRINITY_DN1601_c1_g1_i1	ko00500	Starch and sucrose metabolism	Carbohydrate metabolism
T01-03_TRINITY_DN1615_c0_g1_i1	ko00220	Arginine biosynthesis	Amino acid metabolism
T01-03_TRINITY_DN1615_c0_g1_i1	ko00250	Alanine, aspartate and glutamate metabolism	Amino acid metabolism
T01-03_TRINITY_DN1615_c0_g1_i1	ko00710	Carbon fixation in photosynthetic organisms	Energy metabolism
T01-03_TRINITY_DN16155_c2_g1_i1	ko00600	Sphingolipid metabolism	Lipid metabolism
T01-03_TRINITY_DN1618_c0_g1_i25	ko00564	Glycerophospholipid metabolism	Lipid metabolism
T01-03_TRINITY_DN1618_c0_g1_i25	ko00440	Phosphonate and phosphinate metabolism	Metabolism of other amino acids
T01-03_TRINITY_DN16189_c0_g2_i6	ko00900	Terpenoid backbone biosynthesis	Metabolism of terpenoids and polyketides
T01-03_TRINITY_DN16209_c0_g1_i1	ko00860	Porphyrin metabolism	Metabolism of cofactors and vitamins
T01-03_TRINITY_DN16269_c0_g1_i1	ko00905	Brassinosteroid biosynthesis	Metabolism of terpenoids and polyketides
T01-03_TRINITY_DN1629_c0_g1_i11	ko00100	Steroid biosynthesis	Lipid metabolism
T01-03_TRINITY_DN1629_c0_g1_i11	ko00561	Glycerolipid metabolism	Lipid metabolism
T01-03_TRINITY_DN1629_c0_g1_i11	ko00564	Glycerophospholipid metabolism	Lipid metabolism
T01-03_TRINITY_DN1629_c0_g1_i11	ko00565	Ether lipid metabolism	Lipid metabolism
T01-03_TRINITY_DN1629_c0_g1_i11	ko00590	Arachidonic acid metabolism	Lipid metabolism
T01-03_TRINITY_DN1629_c0_g1_i11	ko00591	Linoleic acid metabolism	Lipid metabolism
T01-03_TRINITY_DN1629_c0_g1_i11	ko00592	alpha-Linolenic acid metabolism	Lipid metabolism
T01-03_TRINITY_DN1630_c0_g3_i1	ko00230	Purine metabolism	Nucleotide metabolism
T01-03_TRINITY_DN1630_c0_g3_i1	ko00240	Pyrimidine metabolism	Nucleotide metabolism
T01-03_TRINITY_DN16319_c0_g1_i1	ko00564	Glycerophospholipid metabolism	Lipid metabolism
T01-03_TRINITY_DN16319_c0_g1_i1	ko00565	Ether lipid metabolism	Lipid metabolism
T01-03_TRINITY_DN16334_c0_g2_i16	ko00270	Cysteine and methionine metabolism	Amino acid metabolism
T01-03_TRINITY_DN16334_c0_g2_i16	ko00450	Selenocompound metabolism	Metabolism of other amino acids
T01-03_TRINITY_DN16334_c0_g3_i3	ko00270	Cysteine and methionine metabolism	Amino acid metabolism
T01-03_TRINITY_DN16334_c0_g3_i3	ko00450	Selenocompound metabolism	Metabolism of other amino acids
T01-03_TRINITY_DN1644_c0_g1_i1	ko00500	Starch and sucrose metabolism	Carbohydrate metabolism
T01-03_TRINITY_DN1644_c0_g1_i1	ko00740	Riboflavin metabolism	Metabolism of cofactors and vitamins
T01-03_TRINITY_DN1644_c0_g1_i1	ko00760	Nicotinate and nicotinamide metabolism	Metabolism of cofactors and vitamins
T01-03_TRINITY_DN1644_c0_g1_i1	ko00770	Pantothenate and CoA biosynthesis	Metabolism of cofactors and vitamins
T01-03_TRINITY_DN1644_c0_g1_i1	ko00230	Purine metabolism	Nucleotide metabolism
T01-03_TRINITY_DN1644_c0_g1_i1	ko00240	Pyrimidine metabolism	Nucleotide metabolism
T01-03_TRINITY_DN16447_c2_g1_i1	ko00230	Purine metabolism	Nucleotide metabolism
T01-03_TRINITY_DN16447_c3_g1_i1	ko00190	Oxidative phosphorylation	Energy metabolism
T01-03_TRINITY_DN16477_c1_g1_i1	ko00062	Fatty acid elongation	Lipid metabolism
T01-03_TRINITY_DN16508_c2_g1_i1	ko00040	Pentose and glucuronate interconversions	Carbohydrate metabolism
T01-03_TRINITY_DN1652_c6_g1_i2	ko00430	Taurine and hypotaurine metabolism	Metabolism of other amino acids
T01-03_TRINITY_DN16535_c0_g1_i1	ko00510	N-Glycan biosynthesis	Glycan biosynthesis and metabolism
T01-03_TRINITY_DN16535_c0_g1_i1	ko00513	Various types of N-glycan biosynthesis	Glycan biosynthesis and metabolism
T01-03_TRINITY_DN16558_c0_g1_i3	ko00600	Sphingolipid metabolism	Lipid metabolism
T01-03_TRINITY_DN16564_c0_g1_i3	ko00051	Fructose and mannose metabolism	Carbohydrate metabolism
T01-03_TRINITY_DN16565_c0_g1_i1	ko00195	Photosynthesis	Energy metabolism
T01-03_TRINITY_DN16648_c1_g1_i1	ko00564	Glycerophospholipid metabolism	Lipid metabolism
T01-03_TRINITY_DN16648_c1_g1_i1	ko00760	Nicotinate and nicotinamide metabolism	Metabolism of cofactors and vitamins
T01-03_TRINITY_DN16672_c0_g1_i1	ko00564	Glycerophospholipid metabolism	Lipid metabolism
T01-03_TRINITY_DN16672_c0_g1_i1	ko00565	Ether lipid metabolism	Lipid metabolism
T01-03_TRINITY_DN16672_c0_g1_i1	ko00590	Arachidonic acid metabolism	Lipid metabolism
T01-03_TRINITY_DN16672_c0_g1_i1	ko00591	Linoleic acid metabolism	Lipid metabolism
T01-03_TRINITY_DN16672_c0_g1_i1	ko00592	alpha-Linolenic acid metabolism	Lipid metabolism
T01-03_TRINITY_DN1672_c1_g1_i2	ko00563	Glycosylphosphatidylinositol (GPI)-anchor biosynthesis	Glycan biosynthesis and metabolism
T01-03_TRINITY_DN16740_c0_g1_i2	ko00564	Glycerophospholipid metabolism	Lipid metabolism
T01-03_TRINITY_DN16823_c0_g1_i1	ko00190	Oxidative phosphorylation	Energy metabolism
T01-03_TRINITY_DN16829_c0_g1_i1	ko00061	Fatty acid biosynthesis	Lipid metabolism
T01-03_TRINITY_DN16829_c0_g1_i1	ko00780	Biotin metabolism	Metabolism of cofactors and vitamins
T01-03_TRINITY_DN16860_c0_g1_i1	ko00230	Purine metabolism	Nucleotide metabolism
T01-03_TRINITY_DN16887_c1_g1_i1	ko00730	Thiamine metabolism	Metabolism of cofactors and vitamins
T01-03_TRINITY_DN16887_c1_g1_i1	ko00230	Purine metabolism	Nucleotide metabolism
T01-03_TRINITY_DN16896_c0_g1_i2	ko00051	Fructose and mannose metabolism	Carbohydrate metabolism
T01-03_TRINITY_DN16952_c0_g1_i1	ko00520	Amino sugar and nucleotide sugar metabolism	Carbohydrate metabolism
T01-03_TRINITY_DN16979_c0_g1_i21	ko00190	Oxidative phosphorylation	Energy metabolism
T01-03_TRINITY_DN16981_c2_g1_i1	ko00500	Starch and sucrose metabolism	Carbohydrate metabolism
T01-03_TRINITY_DN16989_c2_g1_i4	ko00195	Photosynthesis	Energy metabolism
T01-03_TRINITY_DN17_c0_g1_i4	ko00480	Glutathione metabolism	Metabolism of other amino acids
T01-03_TRINITY_DN17050_c0_g1_i1	ko00730	Thiamine metabolism	Metabolism of cofactors and vitamins
T01-03_TRINITY_DN17050_c1_g1_i3	ko00630	Glyoxylate and dicarboxylate metabolism	Carbohydrate metabolism
T01-03_TRINITY_DN17050_c1_g1_i3	ko00670	One carbon pool by folate	Metabolism of cofactors and vitamins
T01-03_TRINITY_DN1707_c0_g3_i2	ko00562	Inositol phosphate metabolism	Carbohydrate metabolism
T01-03_TRINITY_DN17071_c0_g1_i1	ko00010	Glycolysis / Gluconeogenesis	Carbohydrate metabolism
T01-03_TRINITY_DN17071_c0_g1_i1	ko00710	Carbon fixation in photosynthetic organisms	Energy metabolism
T01-03_TRINITY_DN1712_c0_g1_i1	ko00280	Valine, leucine and isoleucine degradation	Amino acid metabolism
T01-03_TRINITY_DN1712_c0_g1_i1	ko00640	Propanoate metabolism	Carbohydrate metabolism
T01-03_TRINITY_DN1712_c0_g1_i1	ko00410	beta-Alanine metabolism	Metabolism of other amino acids
T01-03_TRINITY_DN17140_c0_g1_i1	ko00520	Amino sugar and nucleotide sugar metabolism	Carbohydrate metabolism
T01-03_TRINITY_DN1716_c0_g1_i2	ko00500	Starch and sucrose metabolism	Carbohydrate metabolism
T01-03_TRINITY_DN1718_c1_g1_i6	ko00940	Phenylpropanoid biosynthesis	Biosynthesis of other secondary metabolites
T01-03_TRINITY_DN17192_c2_g1_i1	ko00190	Oxidative phosphorylation	Energy metabolism
T01-03_TRINITY_DN17194_c0_g2_i3	ko00230	Purine metabolism	Nucleotide metabolism
T01-03_TRINITY_DN17194_c0_g2_i3	ko00240	Pyrimidine metabolism	Nucleotide metabolism
T01-03_TRINITY_DN172_c2_g1_i2	ko00510	N-Glycan biosynthesis	Glycan biosynthesis and metabolism
T01-03_TRINITY_DN172_c2_g1_i2	ko00513	Various types of N-glycan biosynthesis	Glycan biosynthesis and metabolism
T01-03_TRINITY_DN17218_c2_g1_i1	ko00230	Purine metabolism	Nucleotide metabolism
T01-03_TRINITY_DN17218_c2_g1_i1	ko00240	Pyrimidine metabolism	Nucleotide metabolism
T01-03_TRINITY_DN1724_c0_g1_i17	ko00540	Lipopolysaccharide biosynthesis	Glycan biosynthesis and metabolism
T01-03_TRINITY_DN17244_c0_g1_i1	ko00330	Arginine and proline metabolism	Amino acid metabolism
T01-03_TRINITY_DN17265_c0_g1_i2	ko00051	Fructose and mannose metabolism	Carbohydrate metabolism
T01-03_TRINITY_DN17265_c2_g1_i1	ko00500	Starch and sucrose metabolism	Carbohydrate metabolism
T01-03_TRINITY_DN1729_c1_g1_i1	ko00500	Starch and sucrose metabolism	Carbohydrate metabolism
T01-03_TRINITY_DN17298_c0_g2_i1	ko00908	Zeatin biosynthesis	Metabolism of terpenoids and polyketides
T01-03_TRINITY_DN1730_c0_g1_i3	ko00290	Valine, leucine and isoleucine biosynthesis	Amino acid metabolism
T01-03_TRINITY_DN1730_c0_g1_i3	ko00770	Pantothenate and CoA biosynthesis	Metabolism of cofactors and vitamins
T01-03_TRINITY_DN17308_c0_g2_i1	ko00380	Tryptophan metabolism	Amino acid metabolism
T01-03_TRINITY_DN17308_c0_g2_i1	ko00232	Caffeine metabolism	Biosynthesis of other secondary metabolites
T01-03_TRINITY_DN17308_c0_g2_i1	ko00943	Isoflavonoid biosynthesis	Biosynthesis of other secondary metabolites
T01-03_TRINITY_DN17308_c0_g2_i1	ko00140	Steroid hormone biosynthesis	Lipid metabolism
T01-03_TRINITY_DN17308_c0_g2_i1	ko00590	Arachidonic acid metabolism	Lipid metabolism
T01-03_TRINITY_DN17308_c0_g2_i1	ko00591	Linoleic acid metabolism	Lipid metabolism
T01-03_TRINITY_DN17308_c0_g2_i1	ko00830	Retinol metabolism	Metabolism of cofactors and vitamins
T01-03_TRINITY_DN17308_c0_g2_i1	ko00905	Brassinosteroid biosynthesis	Metabolism of terpenoids and polyketides
T01-03_TRINITY_DN17308_c0_g2_i1	ko00980	Metabolism of xenobiotics by cytochrome P450	Xenobiotics biodegradation and metabolism
T01-03_TRINITY_DN17308_c0_g2_i1	ko00982	Drug metabolism - cytochrome P450	Xenobiotics biodegradation and metabolism
T01-03_TRINITY_DN1735_c1_g1_i3	ko00640	Propanoate metabolism	Carbohydrate metabolism
T01-03_TRINITY_DN1735_c1_g1_i3	ko00410	beta-Alanine metabolism	Metabolism of other amino acids
T01-03_TRINITY_DN1736_c0_g1_i7	ko00540	Lipopolysaccharide biosynthesis	Glycan biosynthesis and metabolism
T01-03_TRINITY_DN1736_c0_g2_i2	ko00010	Glycolysis / Gluconeogenesis	Carbohydrate metabolism
T01-03_TRINITY_DN1736_c0_g2_i2	ko00620	Pyruvate metabolism	Carbohydrate metabolism
T01-03_TRINITY_DN1736_c0_g2_i2	ko00230	Purine metabolism	Nucleotide metabolism
T01-03_TRINITY_DN17368_c0_g1_i1	ko00940	Phenylpropanoid biosynthesis	Biosynthesis of other secondary metabolites
T01-03_TRINITY_DN17380_c0_g1_i12	ko00510	N-Glycan biosynthesis	Glycan biosynthesis and metabolism
T01-03_TRINITY_DN17380_c0_g1_i12	ko00513	Various types of N-glycan biosynthesis	Glycan biosynthesis and metabolism
T01-03_TRINITY_DN1740_c0_g1_i1	ko00500	Starch and sucrose metabolism	Carbohydrate metabolism
T01-03_TRINITY_DN17423_c0_g1_i1	ko00943	Isoflavonoid biosynthesis	Biosynthesis of other secondary metabolites
T01-03_TRINITY_DN1743_c0_g1_i5	ko00790	Folate biosynthesis	Metabolism of cofactors and vitamins
T01-03_TRINITY_DN17478_c0_g3_i4	ko00561	Glycerolipid metabolism	Lipid metabolism
T01-03_TRINITY_DN17486_c0_g1_i2	ko00670	One carbon pool by folate	Metabolism of cofactors and vitamins
T01-03_TRINITY_DN17486_c0_g1_i2	ko00230	Purine metabolism	Nucleotide metabolism
T01-03_TRINITY_DN17509_c0_g1_i1	ko00220	Arginine biosynthesis	Amino acid metabolism
T01-03_TRINITY_DN17509_c0_g1_i1	ko00250	Alanine, aspartate and glutamate metabolism	Amino acid metabolism
T01-03_TRINITY_DN17510_c0_g1_i1	ko00790	Folate biosynthesis	Metabolism of cofactors and vitamins
T01-03_TRINITY_DN1753_c0_g1_i10	ko00510	N-Glycan biosynthesis	Glycan biosynthesis and metabolism
T01-03_TRINITY_DN17531_c0_g3_i2	ko00563	Glycosylphosphatidylinositol (GPI)-anchor biosynthesis	Glycan biosynthesis and metabolism
T01-03_TRINITY_DN1757_c1_g1_i1	ko00906	Carotenoid biosynthesis	Metabolism of terpenoids and polyketides
T01-03_TRINITY_DN1758_c0_g1_i5	ko00500	Starch and sucrose metabolism	Carbohydrate metabolism
T01-03_TRINITY_DN17681_c0_g1_i1	ko00908	Zeatin biosynthesis	Metabolism of terpenoids and polyketides
T01-03_TRINITY_DN17703_c0_g2_i3	ko00908	Zeatin biosynthesis	Metabolism of terpenoids and polyketides
T01-03_TRINITY_DN1771_c0_g1_i1	ko00230	Purine metabolism	Nucleotide metabolism
T01-03_TRINITY_DN1771_c0_g2_i18	ko00230	Purine metabolism	Nucleotide metabolism
T01-03_TRINITY_DN17717_c0_g1_i1	ko00770	Pantothenate and CoA biosynthesis	Metabolism of cofactors and vitamins
T01-03_TRINITY_DN17728_c0_g1_i2	ko00195	Photosynthesis	Energy metabolism
T01-03_TRINITY_DN1791_c0_g1_i3	ko00630	Glyoxylate and dicarboxylate metabolism	Carbohydrate metabolism
T01-03_TRINITY_DN1791_c0_g1_i3	ko00910	Nitrogen metabolism	Energy metabolism
T01-03_TRINITY_DN1791_c1_g1_i12	ko00860	Porphyrin metabolism	Metabolism of cofactors and vitamins
T01-03_TRINITY_DN1799_c0_g1_i1	ko00062	Fatty acid elongation	Lipid metabolism
T01-03_TRINITY_DN18017_c0_g1_i1	ko00130	Ubiquinone and other terpenoid-quinone biosynthesis	Metabolism of cofactors and vitamins
T01-03_TRINITY_DN18052_c0_g1_i1	ko00562	Inositol phosphate metabolism	Carbohydrate metabolism
T01-03_TRINITY_DN1808_c0_g1_i35	ko00521	Streptomycin biosynthesis	Biosynthesis of other secondary metabolites
T01-03_TRINITY_DN1808_c0_g1_i35	ko00524	Neomycin, kanamycin and gentamicin biosynthesis	Biosynthesis of other secondary metabolites
T01-03_TRINITY_DN1808_c0_g1_i35	ko00010	Glycolysis / Gluconeogenesis	Carbohydrate metabolism
T01-03_TRINITY_DN1808_c0_g1_i35	ko00051	Fructose and mannose metabolism	Carbohydrate metabolism
T01-03_TRINITY_DN1808_c0_g1_i35	ko00052	Galactose metabolism	Carbohydrate metabolism
T01-03_TRINITY_DN1808_c0_g1_i35	ko00500	Starch and sucrose metabolism	Carbohydrate metabolism
T01-03_TRINITY_DN1808_c0_g1_i35	ko00520	Amino sugar and nucleotide sugar metabolism	Carbohydrate metabolism
T01-03_TRINITY_DN18121_c4_g1_i1	ko00562	Inositol phosphate metabolism	Carbohydrate metabolism
T01-03_TRINITY_DN18263_c0_g1_i2	ko00040	Pentose and glucuronate interconversions	Carbohydrate metabolism
T01-03_TRINITY_DN183_c1_g1_i1	ko00290	Valine, leucine and isoleucine biosynthesis	Amino acid metabolism
T01-03_TRINITY_DN183_c1_g1_i1	ko00966	Glucosinolate biosynthesis	Biosynthesis of other secondary metabolites
T01-03_TRINITY_DN183_c1_g1_i1	ko00660	C5-Branched dibasic acid metabolism	Carbohydrate metabolism
T01-03_TRINITY_DN18325_c0_g2_i1	ko00030	Pentose phosphate pathway	Carbohydrate metabolism
T01-03_TRINITY_DN18325_c0_g2_i1	ko00710	Carbon fixation in photosynthetic organisms	Energy metabolism
T01-03_TRINITY_DN18369_c0_g1_i1	ko00564	Glycerophospholipid metabolism	Lipid metabolism
T01-03_TRINITY_DN18388_c2_g1_i1	ko00040	Pentose and glucuronate interconversions	Carbohydrate metabolism
T01-03_TRINITY_DN1844_c5_g1_i2	ko00520	Amino sugar and nucleotide sugar metabolism	Carbohydrate metabolism
T01-03_TRINITY_DN1847_c0_g1_i4	ko00220	Arginine biosynthesis	Amino acid metabolism
T01-03_TRINITY_DN1847_c0_g1_i4	ko00250	Alanine, aspartate and glutamate metabolism	Amino acid metabolism
T01-03_TRINITY_DN1848_c0_g1_i1	ko00562	Inositol phosphate metabolism	Carbohydrate metabolism
T01-03_TRINITY_DN18494_c0_g1_i2	ko00564	Glycerophospholipid metabolism	Lipid metabolism
T01-03_TRINITY_DN18511_c0_g1_i1	ko00590	Arachidonic acid metabolism	Lipid metabolism
T01-03_TRINITY_DN18511_c0_g1_i1	ko00480	Glutathione metabolism	Metabolism of other amino acids
T01-03_TRINITY_DN1855_c1_g2_i3	ko00190	Oxidative phosphorylation	Energy metabolism
T01-03_TRINITY_DN18556_c0_g1_i3	ko00140	Steroid hormone biosynthesis	Lipid metabolism
T01-03_TRINITY_DN1856_c0_g1_i1	ko00941	Flavonoid biosynthesis	Biosynthesis of other secondary metabolites
T01-03_TRINITY_DN1856_c0_g1_i1	ko01058	Acridone alkaloid biosynthesis	Biosynthesis of other secondary metabolites
T01-03_TRINITY_DN18561_c2_g1_i1	ko00900	Terpenoid backbone biosynthesis	Metabolism of terpenoids and polyketides
T01-03_TRINITY_DN18561_c2_g2_i1	ko00900	Terpenoid backbone biosynthesis	Metabolism of terpenoids and polyketides
T01-03_TRINITY_DN1860_c0_g2_i2	ko00140	Steroid hormone biosynthesis	Lipid metabolism
T01-03_TRINITY_DN18650_c0_g2_i1	ko00190	Oxidative phosphorylation	Energy metabolism
T01-03_TRINITY_DN18652_c0_g2_i1	ko00901	Indole alkaloid biosynthesis	Biosynthesis of other secondary metabolites
T01-03_TRINITY_DN18706_c0_g2_i12	ko00908	Zeatin biosynthesis	Metabolism of terpenoids and polyketides
T01-03_TRINITY_DN18709_c0_g1_i2	ko00940	Phenylpropanoid biosynthesis	Biosynthesis of other secondary metabolites
T01-03_TRINITY_DN1872_c0_g1_i3	ko00564	Glycerophospholipid metabolism	Lipid metabolism
T01-03_TRINITY_DN1875_c0_g1_i2	ko00230	Purine metabolism	Nucleotide metabolism
T01-03_TRINITY_DN1875_c0_g1_i2	ko00240	Pyrimidine metabolism	Nucleotide metabolism
T01-03_TRINITY_DN1888_c2_g2_i1	ko00030	Pentose phosphate pathway	Carbohydrate metabolism
T01-03_TRINITY_DN1888_c2_g2_i1	ko00040	Pentose and glucuronate interconversions	Carbohydrate metabolism
T01-03_TRINITY_DN1888_c2_g2_i1	ko00710	Carbon fixation in photosynthetic organisms	Energy metabolism
T01-03_TRINITY_DN1888_c2_g2_i1	ko00240	Pyrimidine metabolism	Nucleotide metabolism
T01-03_TRINITY_DN1888_c2_g2_i1	ko00983	Drug metabolism - other enzymes	Xenobiotics biodegradation and metabolism
T01-03_TRINITY_DN18888_c1_g1_i5	ko00500	Starch and sucrose metabolism	Carbohydrate metabolism
T01-03_TRINITY_DN189_c0_g1_i8	ko00052	Galactose metabolism	Carbohydrate metabolism
T01-03_TRINITY_DN189_c0_g2_i1	ko00061	Fatty acid biosynthesis	Lipid metabolism
T01-03_TRINITY_DN1891_c2_g1_i1	ko00511	Other glycan degradation	Glycan biosynthesis and metabolism
T01-03_TRINITY_DN1891_c3_g1_i1	ko00010	Glycolysis / Gluconeogenesis	Carbohydrate metabolism
T01-03_TRINITY_DN18919_c1_g1_i2	ko00600	Sphingolipid metabolism	Lipid metabolism
T01-03_TRINITY_DN18960_c0_g1_i1	ko00260	Glycine, serine and threonine metabolism	Amino acid metabolism
T01-03_TRINITY_DN19_c2_g1_i9	ko00561	Glycerolipid metabolism	Lipid metabolism
T01-03_TRINITY_DN19_c2_g1_i9	ko00564	Glycerophospholipid metabolism	Lipid metabolism
T01-03_TRINITY_DN19023_c4_g1_i1	ko00280	Valine, leucine and isoleucine degradation	Amino acid metabolism
T01-03_TRINITY_DN19023_c4_g1_i1	ko00333	Prodigiosin biosynthesis	Biosynthesis of other secondary metabolites
T01-03_TRINITY_DN19023_c4_g1_i1	ko00640	Propanoate metabolism	Carbohydrate metabolism
T01-03_TRINITY_DN19023_c4_g1_i1	ko00061	Fatty acid biosynthesis	Lipid metabolism
T01-03_TRINITY_DN19023_c4_g1_i1	ko01040	Biosynthesis of unsaturated fatty acids	Lipid metabolism
T01-03_TRINITY_DN19023_c4_g1_i1	ko00780	Biotin metabolism	Metabolism of cofactors and vitamins
T01-03_TRINITY_DN1904_c0_g2_i1	ko00190	Oxidative phosphorylation	Energy metabolism
T01-03_TRINITY_DN19081_c0_g3_i2	ko00220	Arginine biosynthesis	Amino acid metabolism
T01-03_TRINITY_DN19081_c0_g3_i2	ko00250	Alanine, aspartate and glutamate metabolism	Amino acid metabolism
T01-03_TRINITY_DN19081_c0_g3_i2	ko00910	Nitrogen metabolism	Energy metabolism
T01-03_TRINITY_DN19085_c0_g1_i1	ko00061	Fatty acid biosynthesis	Lipid metabolism
T01-03_TRINITY_DN19085_c0_g1_i1	ko00780	Biotin metabolism	Metabolism of cofactors and vitamins
T01-03_TRINITY_DN19088_c0_g1_i1	ko00010	Glycolysis / Gluconeogenesis	Carbohydrate metabolism
T01-03_TRINITY_DN19088_c0_g1_i1	ko00710	Carbon fixation in photosynthetic organisms	Energy metabolism
T01-03_TRINITY_DN19092_c0_g1_i1	ko00280	Valine, leucine and isoleucine degradation	Amino acid metabolism
T01-03_TRINITY_DN191_c0_g1_i1	ko00190	Oxidative phosphorylation	Energy metabolism
T01-03_TRINITY_DN191_c2_g1_i2	ko00514	Other types of O-glycan biosynthesis	Glycan biosynthesis and metabolism
T01-03_TRINITY_DN191_c2_g2_i2	ko00514	Other types of O-glycan biosynthesis	Glycan biosynthesis and metabolism
T01-03_TRINITY_DN1918_c1_g1_i29	ko00250	Alanine, aspartate and glutamate metabolism	Amino acid metabolism
T01-03_TRINITY_DN1918_c1_g1_i29	ko00330	Arginine and proline metabolism	Amino acid metabolism
T01-03_TRINITY_DN1918_c12_g1_i1	ko00052	Galactose metabolism	Carbohydrate metabolism
T01-03_TRINITY_DN1918_c12_g1_i1	ko00603	Glycosphingolipid biosynthesis - globo and isoglobo series	Glycan biosynthesis and metabolism
T01-03_TRINITY_DN1918_c12_g1_i1	ko00561	Glycerolipid metabolism	Lipid metabolism
T01-03_TRINITY_DN1918_c12_g1_i1	ko00600	Sphingolipid metabolism	Lipid metabolism
T01-03_TRINITY_DN1919_c2_g1_i2	ko00790	Folate biosynthesis	Metabolism of cofactors and vitamins
T01-03_TRINITY_DN1921_c0_g1_i14	ko00540	Lipopolysaccharide biosynthesis	Glycan biosynthesis and metabolism
T01-03_TRINITY_DN19237_c0_g1_i10	ko00563	Glycosylphosphatidylinositol (GPI)-anchor biosynthesis	Glycan biosynthesis and metabolism
T01-03_TRINITY_DN19261_c0_g1_i1	ko00600	Sphingolipid metabolism	Lipid metabolism
T01-03_TRINITY_DN19300_c0_g2_i2	ko00230	Purine metabolism	Nucleotide metabolism
T01-03_TRINITY_DN19309_c0_g1_i2	ko00430	Taurine and hypotaurine metabolism	Metabolism of other amino acids
T01-03_TRINITY_DN1931_c0_g1_i4	ko00940	Phenylpropanoid biosynthesis	Biosynthesis of other secondary metabolites
T01-03_TRINITY_DN1934_c0_g1_i1	ko00190	Oxidative phosphorylation	Energy metabolism
T01-03_TRINITY_DN1935_c0_g1_i1	ko00250	Alanine, aspartate and glutamate metabolism	Amino acid metabolism
T01-03_TRINITY_DN1935_c0_g1_i1	ko00260	Glycine, serine and threonine metabolism	Amino acid metabolism
T01-03_TRINITY_DN1935_c0_g1_i1	ko00630	Glyoxylate and dicarboxylate metabolism	Carbohydrate metabolism
T01-03_TRINITY_DN1935_c0_g1_i1	ko00680	Methane metabolism	Energy metabolism
T01-03_TRINITY_DN19368_c1_g1_i1	ko00230	Purine metabolism	Nucleotide metabolism
T01-03_TRINITY_DN19368_c1_g1_i1	ko00240	Pyrimidine metabolism	Nucleotide metabolism
T01-03_TRINITY_DN1938_c0_g1_i11	ko00220	Arginine biosynthesis	Amino acid metabolism
T01-03_TRINITY_DN1938_c0_g1_i11	ko00250	Alanine, aspartate and glutamate metabolism	Amino acid metabolism
T01-03_TRINITY_DN1938_c0_g1_i11	ko00260	Glycine, serine and threonine metabolism	Amino acid metabolism
T01-03_TRINITY_DN1938_c0_g1_i11	ko00630	Glyoxylate and dicarboxylate metabolism	Carbohydrate metabolism
T01-03_TRINITY_DN1938_c0_g1_i11	ko00710	Carbon fixation in photosynthetic organisms	Energy metabolism
T01-03_TRINITY_DN19380_c2_g1_i1	ko00563	Glycosylphosphatidylinositol (GPI)-anchor biosynthesis	Glycan biosynthesis and metabolism
T01-03_TRINITY_DN1942_c1_g1_i10	ko00520	Amino sugar and nucleotide sugar metabolism	Carbohydrate metabolism
T01-03_TRINITY_DN195_c0_g1_i12	ko00790	Folate biosynthesis	Metabolism of cofactors and vitamins
T01-03_TRINITY_DN1957_c2_g1_i10	ko00940	Phenylpropanoid biosynthesis	Biosynthesis of other secondary metabolites
T01-03_TRINITY_DN1957_c2_g1_i10	ko00500	Starch and sucrose metabolism	Carbohydrate metabolism
T01-03_TRINITY_DN1957_c2_g1_i10	ko00460	Cyanoamino acid metabolism	Metabolism of other amino acids
T01-03_TRINITY_DN1959_c0_g1_i2	ko00333	Prodigiosin biosynthesis	Biosynthesis of other secondary metabolites
T01-03_TRINITY_DN1959_c0_g1_i2	ko00061	Fatty acid biosynthesis	Lipid metabolism
T01-03_TRINITY_DN19609_c0_g1_i1	ko00600	Sphingolipid metabolism	Lipid metabolism
T01-03_TRINITY_DN1962_c0_g1_i13	ko00531	Glycosaminoglycan degradation	Glycan biosynthesis and metabolism
T01-03_TRINITY_DN1962_c2_g1_i1	ko00908	Zeatin biosynthesis	Metabolism of terpenoids and polyketides
T01-03_TRINITY_DN19656_c0_g1_i1	ko00563	Glycosylphosphatidylinositol (GPI)-anchor biosynthesis	Glycan biosynthesis and metabolism
T01-03_TRINITY_DN19657_c0_g1_i3	ko00500	Starch and sucrose metabolism	Carbohydrate metabolism
T01-03_TRINITY_DN19682_c0_g1_i3	ko00520	Amino sugar and nucleotide sugar metabolism	Carbohydrate metabolism
T01-03_TRINITY_DN19710_c0_g1_i1	ko00230	Purine metabolism	Nucleotide metabolism
T01-03_TRINITY_DN19710_c0_g1_i1	ko00240	Pyrimidine metabolism	Nucleotide metabolism
T01-03_TRINITY_DN1977_c0_g1_i11	ko00220	Arginine biosynthesis	Amino acid metabolism
T01-03_TRINITY_DN1978_c1_g1_i1	ko00190	Oxidative phosphorylation	Energy metabolism
T01-03_TRINITY_DN19857_c0_g3_i1	ko00040	Pentose and glucuronate interconversions	Carbohydrate metabolism
T01-03_TRINITY_DN19857_c0_g3_i1	ko00062	Fatty acid elongation	Lipid metabolism
T01-03_TRINITY_DN1986_c1_g1_i1	ko00270	Cysteine and methionine metabolism	Amino acid metabolism
T01-03_TRINITY_DN1986_c1_g1_i1	ko00330	Arginine and proline metabolism	Amino acid metabolism
T01-03_TRINITY_DN19886_c0_g1_i3	ko00500	Starch and sucrose metabolism	Carbohydrate metabolism
T01-03_TRINITY_DN19887_c0_g1_i5	ko00905	Brassinosteroid biosynthesis	Metabolism of terpenoids and polyketides
T01-03_TRINITY_DN19896_c0_g1_i13	ko00190	Oxidative phosphorylation	Energy metabolism
T01-03_TRINITY_DN19924_c0_g1_i3	ko00220	Arginine biosynthesis	Amino acid metabolism
T01-03_TRINITY_DN19924_c0_g1_i3	ko00250	Alanine, aspartate and glutamate metabolism	Amino acid metabolism
T01-03_TRINITY_DN19924_c0_g1_i3	ko00270	Cysteine and methionine metabolism	Amino acid metabolism
T01-03_TRINITY_DN19924_c0_g1_i3	ko00330	Arginine and proline metabolism	Amino acid metabolism
T01-03_TRINITY_DN19924_c0_g1_i3	ko00350	Tyrosine metabolism	Amino acid metabolism
T01-03_TRINITY_DN19924_c0_g1_i3	ko00360	Phenylalanine metabolism	Amino acid metabolism
T01-03_TRINITY_DN19924_c0_g1_i3	ko00400	Phenylalanine, tyrosine and tryptophan biosynthesis	Amino acid metabolism
T01-03_TRINITY_DN19924_c0_g1_i3	ko00950	Isoquinoline alkaloid biosynthesis	Biosynthesis of other secondary metabolites
T01-03_TRINITY_DN19924_c0_g1_i3	ko00960	Tropane, piperidine and pyridine alkaloid biosynthesis	Biosynthesis of other secondary metabolites
T01-03_TRINITY_DN19924_c0_g1_i3	ko00710	Carbon fixation in photosynthetic organisms	Energy metabolism
T01-03_TRINITY_DN19928_c0_g1_i1	ko00270	Cysteine and methionine metabolism	Amino acid metabolism
T01-03_TRINITY_DN19940_c0_g1_i1	ko00195	Photosynthesis	Energy metabolism
T01-03_TRINITY_DN19947_c0_g1_i1	ko00564	Glycerophospholipid metabolism	Lipid metabolism
T01-03_TRINITY_DN1996_c0_g1_i9	ko00230	Purine metabolism	Nucleotide metabolism
T01-03_TRINITY_DN1996_c0_g1_i9	ko00240	Pyrimidine metabolism	Nucleotide metabolism
T01-03_TRINITY_DN19986_c0_g1_i3	ko00260	Glycine, serine and threonine metabolism	Amino acid metabolism
T01-03_TRINITY_DN19986_c0_g1_i3	ko00350	Tyrosine metabolism	Amino acid metabolism
T01-03_TRINITY_DN19986_c0_g1_i3	ko00360	Phenylalanine metabolism	Amino acid metabolism
T01-03_TRINITY_DN19986_c0_g1_i3	ko00950	Isoquinoline alkaloid biosynthesis	Biosynthesis of other secondary metabolites
T01-03_TRINITY_DN19986_c0_g1_i3	ko00960	Tropane, piperidine and pyridine alkaloid biosynthesis	Biosynthesis of other secondary metabolites
T01-03_TRINITY_DN19986_c0_g1_i3	ko00410	beta-Alanine metabolism	Metabolism of other amino acids
T01-03_TRINITY_DN20041_c0_g2_i1	ko00230	Purine metabolism	Nucleotide metabolism
T01-03_TRINITY_DN20041_c0_g2_i1	ko00240	Pyrimidine metabolism	Nucleotide metabolism
T01-03_TRINITY_DN2012_c0_g1_i41	ko00520	Amino sugar and nucleotide sugar metabolism	Carbohydrate metabolism
T01-03_TRINITY_DN2012_c0_g1_i41	ko00511	Other glycan degradation	Glycan biosynthesis and metabolism
T01-03_TRINITY_DN2012_c0_g1_i41	ko00513	Various types of N-glycan biosynthesis	Glycan biosynthesis and metabolism
T01-03_TRINITY_DN2012_c0_g1_i41	ko00531	Glycosaminoglycan degradation	Glycan biosynthesis and metabolism
T01-03_TRINITY_DN2012_c0_g1_i41	ko00603	Glycosphingolipid biosynthesis - globo and isoglobo series	Glycan biosynthesis and metabolism
T01-03_TRINITY_DN2012_c0_g1_i41	ko00604	Glycosphingolipid biosynthesis - ganglio series	Glycan biosynthesis and metabolism
T01-03_TRINITY_DN20129_c1_g1_i3	ko00600	Sphingolipid metabolism	Lipid metabolism
T01-03_TRINITY_DN20131_c0_g2_i1	ko00564	Glycerophospholipid metabolism	Lipid metabolism
T01-03_TRINITY_DN2025_c0_g1_i1	ko00350	Tyrosine metabolism	Amino acid metabolism
T01-03_TRINITY_DN2025_c0_g1_i1	ko00360	Phenylalanine metabolism	Amino acid metabolism
T01-03_TRINITY_DN2025_c0_g1_i1	ko00130	Ubiquinone and other terpenoid-quinone biosynthesis	Metabolism of cofactors and vitamins
T01-03_TRINITY_DN20281_c0_g1_i1	ko00010	Glycolysis / Gluconeogenesis	Carbohydrate metabolism
T01-03_TRINITY_DN20281_c0_g1_i1	ko00020	Citrate cycle (TCA cycle)	Carbohydrate metabolism
T01-03_TRINITY_DN20281_c0_g1_i1	ko00620	Pyruvate metabolism	Carbohydrate metabolism
T01-03_TRINITY_DN20281_c0_g1_i1	ko00710	Carbon fixation in photosynthetic organisms	Energy metabolism
T01-03_TRINITY_DN20319_c0_g1_i7	ko00190	Oxidative phosphorylation	Energy metabolism
T01-03_TRINITY_DN20346_c0_g1_i1	ko00260	Glycine, serine and threonine metabolism	Amino acid metabolism
T01-03_TRINITY_DN20346_c0_g1_i1	ko00680	Methane metabolism	Energy metabolism
T01-03_TRINITY_DN20346_c0_g2_i2	ko00260	Glycine, serine and threonine metabolism	Amino acid metabolism
T01-03_TRINITY_DN20346_c0_g2_i2	ko00680	Methane metabolism	Energy metabolism
T01-03_TRINITY_DN20351_c2_g1_i1	ko00053	Ascorbate and aldarate metabolism	Carbohydrate metabolism
T01-03_TRINITY_DN20351_c2_g1_i1	ko00480	Glutathione metabolism	Metabolism of other amino acids
T01-03_TRINITY_DN20389_c0_g1_i3	ko00040	Pentose and glucuronate interconversions	Carbohydrate metabolism
T01-03_TRINITY_DN20389_c1_g2_i2	ko00040	Pentose and glucuronate interconversions	Carbohydrate metabolism
T01-03_TRINITY_DN20523_c0_g1_i1	ko00500	Starch and sucrose metabolism	Carbohydrate metabolism
T01-03_TRINITY_DN20567_c0_g2_i2	ko00600	Sphingolipid metabolism	Lipid metabolism
T01-03_TRINITY_DN20598_c0_g1_i6	ko00232	Caffeine metabolism	Biosynthesis of other secondary metabolites
T01-03_TRINITY_DN20598_c0_g1_i6	ko00230	Purine metabolism	Nucleotide metabolism
T01-03_TRINITY_DN2061_c0_g2_i10	ko00400	Phenylalanine, tyrosine and tryptophan biosynthesis	Amino acid metabolism
T01-03_TRINITY_DN2061_c0_g2_i10	ko00405	Phenazine biosynthesis	Biosynthesis of other secondary metabolites
T01-03_TRINITY_DN20625_c0_g2_i1	ko00480	Glutathione metabolism	Metabolism of other amino acids
T01-03_TRINITY_DN20625_c0_g2_i1	ko00980	Metabolism of xenobiotics by cytochrome P450	Xenobiotics biodegradation and metabolism
T01-03_TRINITY_DN20625_c0_g2_i1	ko00982	Drug metabolism - cytochrome P450	Xenobiotics biodegradation and metabolism
T01-03_TRINITY_DN20625_c0_g2_i1	ko00983	Drug metabolism - other enzymes	Xenobiotics biodegradation and metabolism
T01-03_TRINITY_DN20653_c1_g2_i1	ko00562	Inositol phosphate metabolism	Carbohydrate metabolism
T01-03_TRINITY_DN2067_c0_g5_i1	ko00380	Tryptophan metabolism	Amino acid metabolism
T01-03_TRINITY_DN2071_c0_g1_i1	ko00260	Glycine, serine and threonine metabolism	Amino acid metabolism
T01-03_TRINITY_DN2071_c0_g1_i1	ko00350	Tyrosine metabolism	Amino acid metabolism
T01-03_TRINITY_DN2071_c0_g1_i1	ko00360	Phenylalanine metabolism	Amino acid metabolism
T01-03_TRINITY_DN2071_c0_g1_i1	ko00950	Isoquinoline alkaloid biosynthesis	Biosynthesis of other secondary metabolites
T01-03_TRINITY_DN2071_c0_g1_i1	ko00960	Tropane, piperidine and pyridine alkaloid biosynthesis	Biosynthesis of other secondary metabolites
T01-03_TRINITY_DN2071_c0_g1_i1	ko00410	beta-Alanine metabolism	Metabolism of other amino acids
T01-03_TRINITY_DN2072_c0_g1_i5	ko00280	Valine, leucine and isoleucine degradation	Amino acid metabolism
T01-03_TRINITY_DN2072_c0_g1_i5	ko00310	Lysine degradation	Amino acid metabolism
T01-03_TRINITY_DN2072_c0_g1_i5	ko00380	Tryptophan metabolism	Amino acid metabolism
T01-03_TRINITY_DN2072_c0_g1_i5	ko00620	Pyruvate metabolism	Carbohydrate metabolism
T01-03_TRINITY_DN2072_c0_g1_i5	ko00630	Glyoxylate and dicarboxylate metabolism	Carbohydrate metabolism
T01-03_TRINITY_DN2072_c0_g1_i5	ko00640	Propanoate metabolism	Carbohydrate metabolism
T01-03_TRINITY_DN2072_c0_g1_i5	ko00650	Butanoate metabolism	Carbohydrate metabolism
T01-03_TRINITY_DN2072_c0_g1_i5	ko00720	Carbon fixation pathways in prokaryotes	Energy metabolism
T01-03_TRINITY_DN2072_c0_g1_i5	ko00071	Fatty acid degradation	Lipid metabolism
T01-03_TRINITY_DN2072_c0_g1_i5	ko00900	Terpenoid backbone biosynthesis	Metabolism of terpenoids and polyketides
T01-03_TRINITY_DN2072_c0_g1_i5	ko00362	Benzoate degradation	Xenobiotics biodegradation and metabolism
T01-03_TRINITY_DN2075_c0_g1_i1	ko00254	Aflatoxin biosynthesis	Biosynthesis of other secondary metabolites
T01-03_TRINITY_DN2075_c0_g1_i1	ko00620	Pyruvate metabolism	Carbohydrate metabolism
T01-03_TRINITY_DN2075_c0_g1_i1	ko00640	Propanoate metabolism	Carbohydrate metabolism
T01-03_TRINITY_DN2075_c0_g1_i1	ko00061	Fatty acid biosynthesis	Lipid metabolism
T01-03_TRINITY_DN20776_c0_g1_i1	ko00940	Phenylpropanoid biosynthesis	Biosynthesis of other secondary metabolites
T01-03_TRINITY_DN20776_c0_g1_i1	ko00500	Starch and sucrose metabolism	Carbohydrate metabolism
T01-03_TRINITY_DN20776_c0_g1_i1	ko00460	Cyanoamino acid metabolism	Metabolism of other amino acids
T01-03_TRINITY_DN20786_c0_g2_i1	ko00062	Fatty acid elongation	Lipid metabolism
T01-03_TRINITY_DN208_c1_g1_i2	ko00040	Pentose and glucuronate interconversions	Carbohydrate metabolism
T01-03_TRINITY_DN208_c1_g1_i2	ko00051	Fructose and mannose metabolism	Carbohydrate metabolism
T01-03_TRINITY_DN2086_c0_g1_i1	ko00040	Pentose and glucuronate interconversions	Carbohydrate metabolism
T01-03_TRINITY_DN2086_c0_g1_i1	ko00051	Fructose and mannose metabolism	Carbohydrate metabolism
T01-03_TRINITY_DN20860_c2_g1_i1	ko00260	Glycine, serine and threonine metabolism	Amino acid metabolism
T01-03_TRINITY_DN20860_c2_g1_i1	ko00350	Tyrosine metabolism	Amino acid metabolism
T01-03_TRINITY_DN20860_c2_g1_i1	ko00360	Phenylalanine metabolism	Amino acid metabolism
T01-03_TRINITY_DN20860_c2_g1_i1	ko00950	Isoquinoline alkaloid biosynthesis	Biosynthesis of other secondary metabolites
T01-03_TRINITY_DN20860_c2_g1_i1	ko00960	Tropane, piperidine and pyridine alkaloid biosynthesis	Biosynthesis of other secondary metabolites
T01-03_TRINITY_DN20860_c2_g1_i1	ko00410	beta-Alanine metabolism	Metabolism of other amino acids
T01-03_TRINITY_DN20927_c2_g1_i1	ko00270	Cysteine and methionine metabolism	Amino acid metabolism
T01-03_TRINITY_DN2094_c3_g1_i7	ko00520	Amino sugar and nucleotide sugar metabolism	Carbohydrate metabolism
T01-03_TRINITY_DN20996_c0_g1_i1	ko00240	Pyrimidine metabolism	Nucleotide metabolism
T01-03_TRINITY_DN2105_c4_g1_i3	ko00061	Fatty acid biosynthesis	Lipid metabolism
T01-03_TRINITY_DN21072_c0_g1_i1	ko00260	Glycine, serine and threonine metabolism	Amino acid metabolism
T01-03_TRINITY_DN21072_c0_g1_i1	ko00630	Glyoxylate and dicarboxylate metabolism	Carbohydrate metabolism
T01-03_TRINITY_DN21072_c0_g1_i1	ko00680	Methane metabolism	Energy metabolism
T01-03_TRINITY_DN21072_c0_g1_i1	ko00670	One carbon pool by folate	Metabolism of cofactors and vitamins
T01-03_TRINITY_DN21072_c0_g1_i1	ko00460	Cyanoamino acid metabolism	Metabolism of other amino acids
T01-03_TRINITY_DN21072_c3_g1_i1	ko00260	Glycine, serine and threonine metabolism	Amino acid metabolism
T01-03_TRINITY_DN21072_c3_g1_i1	ko00630	Glyoxylate and dicarboxylate metabolism	Carbohydrate metabolism
T01-03_TRINITY_DN21072_c3_g1_i1	ko00680	Methane metabolism	Energy metabolism
T01-03_TRINITY_DN21072_c3_g1_i1	ko00670	One carbon pool by folate	Metabolism of cofactors and vitamins
T01-03_TRINITY_DN21072_c3_g1_i1	ko00460	Cyanoamino acid metabolism	Metabolism of other amino acids
T01-03_TRINITY_DN2109_c0_g1_i1	ko00240	Pyrimidine metabolism	Nucleotide metabolism
T01-03_TRINITY_DN2109_c0_g1_i1	ko00983	Drug metabolism - other enzymes	Xenobiotics biodegradation and metabolism
T01-03_TRINITY_DN21103_c0_g1_i2	ko00100	Steroid biosynthesis	Lipid metabolism
T01-03_TRINITY_DN2111_c0_g1_i1	ko00010	Glycolysis / Gluconeogenesis	Carbohydrate metabolism
T01-03_TRINITY_DN2111_c0_g1_i1	ko00620	Pyruvate metabolism	Carbohydrate metabolism
T01-03_TRINITY_DN2111_c0_g1_i1	ko00230	Purine metabolism	Nucleotide metabolism
T01-03_TRINITY_DN21117_c0_g1_i4	ko00860	Porphyrin metabolism	Metabolism of cofactors and vitamins
T01-03_TRINITY_DN21127_c0_g1_i2	ko00561	Glycerolipid metabolism	Lipid metabolism
T01-03_TRINITY_DN21127_c0_g1_i2	ko00564	Glycerophospholipid metabolism	Lipid metabolism
T01-03_TRINITY_DN21139_c0_g1_i1	ko00053	Ascorbate and aldarate metabolism	Carbohydrate metabolism
T01-03_TRINITY_DN21139_c0_g1_i1	ko00480	Glutathione metabolism	Metabolism of other amino acids
T01-03_TRINITY_DN21146_c0_g2_i13	ko00564	Glycerophospholipid metabolism	Lipid metabolism
T01-03_TRINITY_DN21158_c0_g1_i2	ko00071	Fatty acid degradation	Lipid metabolism
T01-03_TRINITY_DN21158_c0_g1_i2	ko00592	alpha-Linolenic acid metabolism	Lipid metabolism
T01-03_TRINITY_DN212_c1_g1_i2	ko00361	Chlorocyclohexane and chlorobenzene degradation	Xenobiotics biodegradation and metabolism
T01-03_TRINITY_DN212_c1_g1_i2	ko00364	Fluorobenzoate degradation	Xenobiotics biodegradation and metabolism
T01-03_TRINITY_DN2121_c0_g1_i7	ko00230	Purine metabolism	Nucleotide metabolism
T01-03_TRINITY_DN2121_c0_g1_i7	ko00240	Pyrimidine metabolism	Nucleotide metabolism
T01-03_TRINITY_DN2121_c1_g1_i3	ko00520	Amino sugar and nucleotide sugar metabolism	Carbohydrate metabolism
T01-03_TRINITY_DN21213_c0_g1_i1	ko00564	Glycerophospholipid metabolism	Lipid metabolism
T01-03_TRINITY_DN21213_c0_g1_i1	ko00565	Ether lipid metabolism	Lipid metabolism
T01-03_TRINITY_DN2124_c0_g2_i2	ko00860	Porphyrin metabolism	Metabolism of cofactors and vitamins
T01-03_TRINITY_DN21256_c0_g1_i1	ko00300	Lysine biosynthesis	Amino acid metabolism
T01-03_TRINITY_DN21256_c0_g1_i1	ko00261	Monobactam biosynthesis	Biosynthesis of other secondary metabolites
T01-03_TRINITY_DN2129_c0_g1_i2	ko00730	Thiamine metabolism	Metabolism of cofactors and vitamins
T01-03_TRINITY_DN2129_c0_g1_i2	ko00230	Purine metabolism	Nucleotide metabolism
T01-03_TRINITY_DN2133_c0_g4_i1	ko00195	Photosynthesis	Energy metabolism
T01-03_TRINITY_DN21336_c0_g1_i1	ko00260	Glycine, serine and threonine metabolism	Amino acid metabolism
T01-03_TRINITY_DN21336_c0_g1_i1	ko00270	Cysteine and methionine metabolism	Amino acid metabolism
T01-03_TRINITY_DN21336_c0_g1_i1	ko00300	Lysine biosynthesis	Amino acid metabolism
T01-03_TRINITY_DN21336_c0_g1_i1	ko00261	Monobactam biosynthesis	Biosynthesis of other secondary metabolites
T01-03_TRINITY_DN21429_c0_g1_i1	ko00190	Oxidative phosphorylation	Energy metabolism
T01-03_TRINITY_DN2143_c1_g1_i4	ko00620	Pyruvate metabolism	Carbohydrate metabolism
T01-03_TRINITY_DN2143_c1_g2_i3	ko00590	Arachidonic acid metabolism	Lipid metabolism
T01-03_TRINITY_DN2143_c1_g2_i3	ko00480	Glutathione metabolism	Metabolism of other amino acids
T01-03_TRINITY_DN2143_c5_g1_i1	ko00230	Purine metabolism	Nucleotide metabolism
T01-03_TRINITY_DN21451_c0_g1_i1	ko00620	Pyruvate metabolism	Carbohydrate metabolism
T01-03_TRINITY_DN21459_c0_g1_i2	ko00590	Arachidonic acid metabolism	Lipid metabolism
T01-03_TRINITY_DN21466_c0_g1_i2	ko00190	Oxidative phosphorylation	Energy metabolism
T01-03_TRINITY_DN215_c0_g1_i7	ko00270	Cysteine and methionine metabolism	Amino acid metabolism
T01-03_TRINITY_DN215_c0_g1_i7	ko00450	Selenocompound metabolism	Metabolism of other amino acids
T01-03_TRINITY_DN215_c0_g3_i1	ko00270	Cysteine and methionine metabolism	Amino acid metabolism
T01-03_TRINITY_DN215_c0_g3_i1	ko00450	Selenocompound metabolism	Metabolism of other amino acids
T01-03_TRINITY_DN21619_c4_g2_i1	ko00514	Other types of O-glycan biosynthesis	Glycan biosynthesis and metabolism
T01-03_TRINITY_DN21624_c0_g1_i1	ko00040	Pentose and glucuronate interconversions	Carbohydrate metabolism
T01-03_TRINITY_DN2166_c0_g2_i1	ko00030	Pentose phosphate pathway	Carbohydrate metabolism
T01-03_TRINITY_DN2166_c0_g2_i1	ko00230	Purine metabolism	Nucleotide metabolism
T01-03_TRINITY_DN2171_c1_g2_i1	ko00020	Citrate cycle (TCA cycle)	Carbohydrate metabolism
T01-03_TRINITY_DN2171_c1_g2_i1	ko00640	Propanoate metabolism	Carbohydrate metabolism
T01-03_TRINITY_DN2171_c2_g1_i4	ko00760	Nicotinate and nicotinamide metabolism	Metabolism of cofactors and vitamins
T01-03_TRINITY_DN2171_c2_g1_i4	ko00230	Purine metabolism	Nucleotide metabolism
T01-03_TRINITY_DN2171_c2_g1_i4	ko00240	Pyrimidine metabolism	Nucleotide metabolism
T01-03_TRINITY_DN2171_c2_g2_i1	ko00760	Nicotinate and nicotinamide metabolism	Metabolism of cofactors and vitamins
T01-03_TRINITY_DN2171_c2_g2_i1	ko00230	Purine metabolism	Nucleotide metabolism
T01-03_TRINITY_DN2171_c2_g2_i1	ko00240	Pyrimidine metabolism	Nucleotide metabolism
T01-03_TRINITY_DN2174_c0_g1_i2	ko00500	Starch and sucrose metabolism	Carbohydrate metabolism
T01-03_TRINITY_DN2176_c0_g1_i1	ko00480	Glutathione metabolism	Metabolism of other amino acids
T01-03_TRINITY_DN2176_c0_g1_i1	ko00980	Metabolism of xenobiotics by cytochrome P450	Xenobiotics biodegradation and metabolism
T01-03_TRINITY_DN2176_c0_g1_i1	ko00982	Drug metabolism - cytochrome P450	Xenobiotics biodegradation and metabolism
T01-03_TRINITY_DN2176_c0_g1_i1	ko00983	Drug metabolism - other enzymes	Xenobiotics biodegradation and metabolism
T01-03_TRINITY_DN2181_c0_g1_i21	ko00310	Lysine degradation	Amino acid metabolism
T01-03_TRINITY_DN2183_c0_g1_i22	ko00190	Oxidative phosphorylation	Energy metabolism
T01-03_TRINITY_DN2183_c5_g1_i1	ko00010	Glycolysis / Gluconeogenesis	Carbohydrate metabolism
T01-03_TRINITY_DN2183_c5_g1_i1	ko00620	Pyruvate metabolism	Carbohydrate metabolism
T01-03_TRINITY_DN2183_c5_g1_i1	ko00230	Purine metabolism	Nucleotide metabolism
T01-03_TRINITY_DN2184_c0_g1_i18	ko00500	Starch and sucrose metabolism	Carbohydrate metabolism
T01-03_TRINITY_DN21851_c0_g1_i1	ko00940	Phenylpropanoid biosynthesis	Biosynthesis of other secondary metabolites
T01-03_TRINITY_DN219_c0_g2_i2	ko00620	Pyruvate metabolism	Carbohydrate metabolism
T01-03_TRINITY_DN219_c0_g2_i2	ko00640	Propanoate metabolism	Carbohydrate metabolism
T01-03_TRINITY_DN219_c0_g2_i2	ko00720	Carbon fixation pathways in prokaryotes	Energy metabolism
T01-03_TRINITY_DN219_c0_g2_i2	ko00061	Fatty acid biosynthesis	Lipid metabolism
T01-03_TRINITY_DN22060_c0_g1_i2	ko00500	Starch and sucrose metabolism	Carbohydrate metabolism
T01-03_TRINITY_DN22060_c0_g1_i2	ko00520	Amino sugar and nucleotide sugar metabolism	Carbohydrate metabolism
T01-03_TRINITY_DN22077_c0_g1_i1	ko00500	Starch and sucrose metabolism	Carbohydrate metabolism
T01-03_TRINITY_DN22077_c0_g2_i1	ko00500	Starch and sucrose metabolism	Carbohydrate metabolism
T01-03_TRINITY_DN2210_c1_g2_i15	ko00270	Cysteine and methionine metabolism	Amino acid metabolism
T01-03_TRINITY_DN22115_c0_g2_i1	ko00290	Valine, leucine and isoleucine biosynthesis	Amino acid metabolism
T01-03_TRINITY_DN22115_c0_g2_i1	ko00966	Glucosinolate biosynthesis	Biosynthesis of other secondary metabolites
T01-03_TRINITY_DN22115_c0_g2_i1	ko00660	C5-Branched dibasic acid metabolism	Carbohydrate metabolism
T01-03_TRINITY_DN2213_c0_g4_i3	ko00040	Pentose and glucuronate interconversions	Carbohydrate metabolism
T01-03_TRINITY_DN2216_c0_g1_i4	ko00240	Pyrimidine metabolism	Nucleotide metabolism
T01-03_TRINITY_DN22167_c0_g1_i1	ko00900	Terpenoid backbone biosynthesis	Metabolism of terpenoids and polyketides
T01-03_TRINITY_DN22187_c1_g1_i1	ko00040	Pentose and glucuronate interconversions	Carbohydrate metabolism
T01-03_TRINITY_DN2219_c0_g1_i7	ko00051	Fructose and mannose metabolism	Carbohydrate metabolism
T01-03_TRINITY_DN2219_c0_g1_i7	ko00680	Methane metabolism	Energy metabolism
T01-03_TRINITY_DN2219_c0_g1_i7	ko00561	Glycerolipid metabolism	Lipid metabolism
T01-03_TRINITY_DN2221_c2_g1_i3	ko00196	Photosynthesis - antenna proteins	Energy metabolism
T01-03_TRINITY_DN22229_c1_g1_i1	ko00520	Amino sugar and nucleotide sugar metabolism	Carbohydrate metabolism
T01-03_TRINITY_DN22281_c0_g4_i1	ko00400	Phenylalanine, tyrosine and tryptophan biosynthesis	Amino acid metabolism
T01-03_TRINITY_DN2229_c0_g1_i2	ko00270	Cysteine and methionine metabolism	Amino acid metabolism
T01-03_TRINITY_DN2229_c0_g1_i2	ko00330	Arginine and proline metabolism	Amino acid metabolism
T01-03_TRINITY_DN2229_c0_g1_i2	ko00410	beta-Alanine metabolism	Metabolism of other amino acids
T01-03_TRINITY_DN2229_c0_g1_i2	ko00480	Glutathione metabolism	Metabolism of other amino acids
T01-03_TRINITY_DN2229_c0_g2_i4	ko00270	Cysteine and methionine metabolism	Amino acid metabolism
T01-03_TRINITY_DN2229_c0_g2_i4	ko00330	Arginine and proline metabolism	Amino acid metabolism
T01-03_TRINITY_DN2229_c0_g2_i4	ko00410	beta-Alanine metabolism	Metabolism of other amino acids
T01-03_TRINITY_DN2229_c0_g2_i4	ko00480	Glutathione metabolism	Metabolism of other amino acids
T01-03_TRINITY_DN223_c1_g1_i2	ko00514	Other types of O-glycan biosynthesis	Glycan biosynthesis and metabolism
T01-03_TRINITY_DN223_c1_g2_i2	ko00514	Other types of O-glycan biosynthesis	Glycan biosynthesis and metabolism
T01-03_TRINITY_DN22312_c0_g2_i1	ko00561	Glycerolipid metabolism	Lipid metabolism
T01-03_TRINITY_DN22312_c0_g2_i1	ko00564	Glycerophospholipid metabolism	Lipid metabolism
T01-03_TRINITY_DN2237_c0_g1_i4	ko00051	Fructose and mannose metabolism	Carbohydrate metabolism
T01-03_TRINITY_DN2237_c0_g1_i4	ko00520	Amino sugar and nucleotide sugar metabolism	Carbohydrate metabolism
T01-03_TRINITY_DN22371_c0_g1_i1	ko00600	Sphingolipid metabolism	Lipid metabolism
T01-03_TRINITY_DN22371_c0_g2_i1	ko00600	Sphingolipid metabolism	Lipid metabolism
T01-03_TRINITY_DN2244_c0_g1_i2	ko00620	Pyruvate metabolism	Carbohydrate metabolism
T01-03_TRINITY_DN22445_c0_g1_i6	ko00500	Starch and sucrose metabolism	Carbohydrate metabolism
T01-03_TRINITY_DN225_c0_g2_i1	ko00280	Valine, leucine and isoleucine degradation	Amino acid metabolism
T01-03_TRINITY_DN225_c0_g2_i1	ko00310	Lysine degradation	Amino acid metabolism
T01-03_TRINITY_DN225_c0_g2_i1	ko00330	Arginine and proline metabolism	Amino acid metabolism
T01-03_TRINITY_DN225_c0_g2_i1	ko00340	Histidine metabolism	Amino acid metabolism
T01-03_TRINITY_DN225_c0_g2_i1	ko00380	Tryptophan metabolism	Amino acid metabolism
T01-03_TRINITY_DN225_c0_g2_i1	ko00010	Glycolysis / Gluconeogenesis	Carbohydrate metabolism
T01-03_TRINITY_DN225_c0_g2_i1	ko00053	Ascorbate and aldarate metabolism	Carbohydrate metabolism
T01-03_TRINITY_DN225_c0_g2_i1	ko00620	Pyruvate metabolism	Carbohydrate metabolism
T01-03_TRINITY_DN225_c0_g2_i1	ko00071	Fatty acid degradation	Lipid metabolism
T01-03_TRINITY_DN225_c0_g2_i1	ko00561	Glycerolipid metabolism	Lipid metabolism
T01-03_TRINITY_DN225_c0_g2_i1	ko00410	beta-Alanine metabolism	Metabolism of other amino acids
T01-03_TRINITY_DN225_c0_g2_i1	ko00903	Limonene and pinene degradation	Metabolism of terpenoids and polyketides
T01-03_TRINITY_DN225_c0_g2_i1	ko00981	Insect hormone biosynthesis	Metabolism of terpenoids and polyketides
T01-03_TRINITY_DN225_c0_g2_i1	ko00625	Chloroalkane and chloroalkene degradation	Xenobiotics biodegradation and metabolism
T01-03_TRINITY_DN2258_c0_g1_i3	ko00260	Glycine, serine and threonine metabolism	Amino acid metabolism
T01-03_TRINITY_DN2258_c0_g1_i3	ko00400	Phenylalanine, tyrosine and tryptophan biosynthesis	Amino acid metabolism
T01-03_TRINITY_DN2261_c1_g2_i1	ko00052	Galactose metabolism	Carbohydrate metabolism
T01-03_TRINITY_DN2264_c0_g1_i1	ko00520	Amino sugar and nucleotide sugar metabolism	Carbohydrate metabolism
T01-03_TRINITY_DN22641_c0_g1_i1	ko00380	Tryptophan metabolism	Amino acid metabolism
T01-03_TRINITY_DN22641_c0_g1_i1	ko00943	Isoflavonoid biosynthesis	Biosynthesis of other secondary metabolites
T01-03_TRINITY_DN22641_c0_g1_i1	ko00140	Steroid hormone biosynthesis	Lipid metabolism
T01-03_TRINITY_DN22641_c0_g1_i1	ko00590	Arachidonic acid metabolism	Lipid metabolism
T01-03_TRINITY_DN22641_c0_g1_i1	ko00591	Linoleic acid metabolism	Lipid metabolism
T01-03_TRINITY_DN22641_c0_g1_i1	ko00830	Retinol metabolism	Metabolism of cofactors and vitamins
T01-03_TRINITY_DN22641_c0_g1_i1	ko00905	Brassinosteroid biosynthesis	Metabolism of terpenoids and polyketides
T01-03_TRINITY_DN22641_c0_g1_i1	ko00980	Metabolism of xenobiotics by cytochrome P450	Xenobiotics biodegradation and metabolism
T01-03_TRINITY_DN2272_c0_g1_i8	ko00040	Pentose and glucuronate interconversions	Carbohydrate metabolism
T01-03_TRINITY_DN2272_c2_g1_i1	ko00190	Oxidative phosphorylation	Energy metabolism
T01-03_TRINITY_DN22722_c0_g1_i1	ko00330	Arginine and proline metabolism	Amino acid metabolism
T01-03_TRINITY_DN22722_c0_g1_i1	ko00360	Phenylalanine metabolism	Amino acid metabolism
T01-03_TRINITY_DN22722_c0_g1_i1	ko00380	Tryptophan metabolism	Amino acid metabolism
T01-03_TRINITY_DN22722_c0_g1_i1	ko00627	Aminobenzoate degradation	Xenobiotics biodegradation and metabolism
T01-03_TRINITY_DN22722_c0_g1_i1	ko00643	Styrene degradation	Xenobiotics biodegradation and metabolism
T01-03_TRINITY_DN22732_c3_g1_i1	ko00260	Glycine, serine and threonine metabolism	Amino acid metabolism
T01-03_TRINITY_DN22800_c4_g1_i2	ko00360	Phenylalanine metabolism	Amino acid metabolism
T01-03_TRINITY_DN22800_c4_g1_i2	ko00940	Phenylpropanoid biosynthesis	Biosynthesis of other secondary metabolites
T01-03_TRINITY_DN22800_c4_g1_i2	ko00130	Ubiquinone and other terpenoid-quinone biosynthesis	Metabolism of cofactors and vitamins
T01-03_TRINITY_DN22819_c2_g1_i2	ko00940	Phenylpropanoid biosynthesis	Biosynthesis of other secondary metabolites
T01-03_TRINITY_DN22833_c0_g1_i19	ko00630	Glyoxylate and dicarboxylate metabolism	Carbohydrate metabolism
T01-03_TRINITY_DN2285_c0_g1_i11	ko00340	Histidine metabolism	Amino acid metabolism
T01-03_TRINITY_DN2288_c2_g1_i1	ko00860	Porphyrin metabolism	Metabolism of cofactors and vitamins
T01-03_TRINITY_DN2288_c3_g1_i2	ko00561	Glycerolipid metabolism	Lipid metabolism
T01-03_TRINITY_DN22890_c0_g1_i3	ko01040	Biosynthesis of unsaturated fatty acids	Lipid metabolism
T01-03_TRINITY_DN2295_c1_g1_i1	ko00511	Other glycan degradation	Glycan biosynthesis and metabolism
T01-03_TRINITY_DN22986_c0_g1_i1	ko00564	Glycerophospholipid metabolism	Lipid metabolism
T01-03_TRINITY_DN22986_c0_g1_i1	ko00565	Ether lipid metabolism	Lipid metabolism
T01-03_TRINITY_DN22986_c0_g1_i1	ko00590	Arachidonic acid metabolism	Lipid metabolism
T01-03_TRINITY_DN22986_c0_g1_i1	ko00591	Linoleic acid metabolism	Lipid metabolism
T01-03_TRINITY_DN22986_c0_g1_i1	ko00592	alpha-Linolenic acid metabolism	Lipid metabolism
T01-03_TRINITY_DN23_c0_g1_i2	ko00190	Oxidative phosphorylation	Energy metabolism
T01-03_TRINITY_DN23012_c0_g1_i1	ko00563	Glycosylphosphatidylinositol (GPI)-anchor biosynthesis	Glycan biosynthesis and metabolism
T01-03_TRINITY_DN2308_c0_g1_i56	ko00940	Phenylpropanoid biosynthesis	Biosynthesis of other secondary metabolites
T01-03_TRINITY_DN23089_c1_g1_i1	ko00061	Fatty acid biosynthesis	Lipid metabolism
T01-03_TRINITY_DN23089_c1_g4_i1	ko00061	Fatty acid biosynthesis	Lipid metabolism
T01-03_TRINITY_DN23131_c2_g1_i2	ko00260	Glycine, serine and threonine metabolism	Amino acid metabolism
T01-03_TRINITY_DN23131_c2_g1_i2	ko00010	Glycolysis / Gluconeogenesis	Carbohydrate metabolism
T01-03_TRINITY_DN23131_c2_g1_i2	ko00680	Methane metabolism	Energy metabolism
T01-03_TRINITY_DN23131_c3_g1_i1	ko00906	Carotenoid biosynthesis	Metabolism of terpenoids and polyketides
T01-03_TRINITY_DN23149_c0_g1_i1	ko00195	Photosynthesis	Energy metabolism
T01-03_TRINITY_DN23155_c0_g2_i1	ko00230	Purine metabolism	Nucleotide metabolism
T01-03_TRINITY_DN23155_c0_g2_i1	ko00240	Pyrimidine metabolism	Nucleotide metabolism
T01-03_TRINITY_DN23160_c0_g1_i1	ko00010	Glycolysis / Gluconeogenesis	Carbohydrate metabolism
T01-03_TRINITY_DN23160_c0_g1_i1	ko00020	Citrate cycle (TCA cycle)	Carbohydrate metabolism
T01-03_TRINITY_DN23160_c0_g1_i1	ko00620	Pyruvate metabolism	Carbohydrate metabolism
T01-03_TRINITY_DN23160_c0_g1_i1	ko00710	Carbon fixation in photosynthetic organisms	Energy metabolism
T01-03_TRINITY_DN23161_c5_g1_i1	ko00190	Oxidative phosphorylation	Energy metabolism
T01-03_TRINITY_DN2320_c0_g1_i13	ko00500	Starch and sucrose metabolism	Carbohydrate metabolism
T01-03_TRINITY_DN233_c0_g1_i2	ko00061	Fatty acid biosynthesis	Lipid metabolism
T01-03_TRINITY_DN233_c0_g1_i2	ko00780	Biotin metabolism	Metabolism of cofactors and vitamins
T01-03_TRINITY_DN233_c0_g2_i1	ko00061	Fatty acid biosynthesis	Lipid metabolism
T01-03_TRINITY_DN233_c0_g2_i1	ko00780	Biotin metabolism	Metabolism of cofactors and vitamins
T01-03_TRINITY_DN23437_c0_g1_i1	ko00250	Alanine, aspartate and glutamate metabolism	Amino acid metabolism
T01-03_TRINITY_DN23437_c0_g1_i1	ko00240	Pyrimidine metabolism	Nucleotide metabolism
T01-03_TRINITY_DN2348_c1_g1_i2	ko00941	Flavonoid biosynthesis	Biosynthesis of other secondary metabolites
T01-03_TRINITY_DN23517_c0_g1_i1	ko00600	Sphingolipid metabolism	Lipid metabolism
T01-03_TRINITY_DN23544_c0_g1_i2	ko00590	Arachidonic acid metabolism	Lipid metabolism
T01-03_TRINITY_DN23544_c0_g1_i2	ko00480	Glutathione metabolism	Metabolism of other amino acids
T01-03_TRINITY_DN2369_c0_g3_i2	ko00564	Glycerophospholipid metabolism	Lipid metabolism
T01-03_TRINITY_DN2369_c0_g3_i2	ko00592	alpha-Linolenic acid metabolism	Lipid metabolism
T01-03_TRINITY_DN23692_c0_g1_i1	ko00220	Arginine biosynthesis	Amino acid metabolism
T01-03_TRINITY_DN2373_c2_g1_i2	ko00561	Glycerolipid metabolism	Lipid metabolism
T01-03_TRINITY_DN23746_c1_g2_i1	ko00564	Glycerophospholipid metabolism	Lipid metabolism
T01-03_TRINITY_DN23802_c0_g2_i1	ko00940	Phenylpropanoid biosynthesis	Biosynthesis of other secondary metabolites
T01-03_TRINITY_DN23802_c0_g2_i1	ko00500	Starch and sucrose metabolism	Carbohydrate metabolism
T01-03_TRINITY_DN23802_c0_g2_i1	ko00460	Cyanoamino acid metabolism	Metabolism of other amino acids
T01-03_TRINITY_DN23832_c0_g1_i1	ko00350	Tyrosine metabolism	Amino acid metabolism
T01-03_TRINITY_DN23832_c0_g1_i1	ko00643	Styrene degradation	Xenobiotics biodegradation and metabolism
T01-03_TRINITY_DN2384_c0_g1_i2	ko00592	alpha-Linolenic acid metabolism	Lipid metabolism
T01-03_TRINITY_DN2385_c0_g1_i2	ko00564	Glycerophospholipid metabolism	Lipid metabolism
T01-03_TRINITY_DN23871_c0_g1_i1	ko00900	Terpenoid backbone biosynthesis	Metabolism of terpenoids and polyketides
T01-03_TRINITY_DN23930_c0_g1_i2	ko00061	Fatty acid biosynthesis	Lipid metabolism
T01-03_TRINITY_DN23930_c0_g1_i2	ko01040	Biosynthesis of unsaturated fatty acids	Lipid metabolism
T01-03_TRINITY_DN23933_c0_g1_i2	ko00061	Fatty acid biosynthesis	Lipid metabolism
T01-03_TRINITY_DN23933_c0_g1_i2	ko00071	Fatty acid degradation	Lipid metabolism
T01-03_TRINITY_DN23957_c0_g1_i2	ko00230	Purine metabolism	Nucleotide metabolism
T01-03_TRINITY_DN2396_c1_g1_i2	ko00730	Thiamine metabolism	Metabolism of cofactors and vitamins
T01-03_TRINITY_DN240_c0_g3_i1	ko00310	Lysine degradation	Amino acid metabolism
T01-03_TRINITY_DN240_c0_g4_i2	ko00860	Porphyrin metabolism	Metabolism of cofactors and vitamins
T01-03_TRINITY_DN24002_c2_g1_i13	ko00860	Porphyrin metabolism	Metabolism of cofactors and vitamins
T01-03_TRINITY_DN24039_c0_g1_i2	ko00310	Lysine degradation	Amino acid metabolism
T01-03_TRINITY_DN241_c15_g1_i1	ko00511	Other glycan degradation	Glycan biosynthesis and metabolism
T01-03_TRINITY_DN2410_c1_g1_i9	ko00943	Isoflavonoid biosynthesis	Biosynthesis of other secondary metabolites
T01-03_TRINITY_DN24101_c1_g1_i1	ko00010	Glycolysis / Gluconeogenesis	Carbohydrate metabolism
T01-03_TRINITY_DN24101_c1_g1_i1	ko00620	Pyruvate metabolism	Carbohydrate metabolism
T01-03_TRINITY_DN24101_c1_g1_i1	ko00230	Purine metabolism	Nucleotide metabolism
T01-03_TRINITY_DN24106_c0_g1_i26	ko00670	One carbon pool by folate	Metabolism of cofactors and vitamins
T01-03_TRINITY_DN24133_c0_g1_i1	ko00900	Terpenoid backbone biosynthesis	Metabolism of terpenoids and polyketides
T01-03_TRINITY_DN24133_c0_g1_i1	ko00902	Monoterpenoid biosynthesis	Metabolism of terpenoids and polyketides
T01-03_TRINITY_DN24284_c0_g1_i1	ko00534	Glycosaminoglycan biosynthesis - heparan sulfate / heparin	Glycan biosynthesis and metabolism
T01-03_TRINITY_DN243_c0_g1_i12	ko00010	Glycolysis / Gluconeogenesis	Carbohydrate metabolism
T01-03_TRINITY_DN243_c0_g1_i12	ko00020	Citrate cycle (TCA cycle)	Carbohydrate metabolism
T01-03_TRINITY_DN243_c0_g1_i12	ko00620	Pyruvate metabolism	Carbohydrate metabolism
T01-03_TRINITY_DN243_c0_g1_i12	ko00710	Carbon fixation in photosynthetic organisms	Energy metabolism
T01-03_TRINITY_DN24310_c0_g1_i2	ko00920	Sulfur metabolism	Energy metabolism
T01-03_TRINITY_DN2432_c0_g1_i11	ko00330	Arginine and proline metabolism	Amino acid metabolism
T01-03_TRINITY_DN2437_c3_g1_i1	ko00071	Fatty acid degradation	Lipid metabolism
T01-03_TRINITY_DN2437_c3_g1_i1	ko00592	alpha-Linolenic acid metabolism	Lipid metabolism
T01-03_TRINITY_DN244_c2_g1_i2	ko00053	Ascorbate and aldarate metabolism	Carbohydrate metabolism
T01-03_TRINITY_DN2440_c1_g1_i1	ko00250	Alanine, aspartate and glutamate metabolism	Amino acid metabolism
T01-03_TRINITY_DN24402_c0_g1_i2	ko00340	Histidine metabolism	Amino acid metabolism
T01-03_TRINITY_DN24456_c0_g1_i2	ko00760	Nicotinate and nicotinamide metabolism	Metabolism of cofactors and vitamins
T01-03_TRINITY_DN24520_c0_g1_i1	ko00190	Oxidative phosphorylation	Energy metabolism
T01-03_TRINITY_DN2453_c1_g1_i2	ko00940	Phenylpropanoid biosynthesis	Biosynthesis of other secondary metabolites
T01-03_TRINITY_DN246_c0_g1_i12	ko00710	Carbon fixation in photosynthetic organisms	Energy metabolism
T01-03_TRINITY_DN246_c0_g2_i6	ko00710	Carbon fixation in photosynthetic organisms	Energy metabolism
T01-03_TRINITY_DN24649_c0_g1_i1	ko00190	Oxidative phosphorylation	Energy metabolism
T01-03_TRINITY_DN247_c0_g1_i1	ko00010	Glycolysis / Gluconeogenesis	Carbohydrate metabolism
T01-03_TRINITY_DN247_c0_g1_i1	ko00030	Pentose phosphate pathway	Carbohydrate metabolism
T01-03_TRINITY_DN247_c0_g1_i1	ko00051	Fructose and mannose metabolism	Carbohydrate metabolism
T01-03_TRINITY_DN247_c0_g1_i1	ko00680	Methane metabolism	Energy metabolism
T01-03_TRINITY_DN247_c0_g1_i1	ko00710	Carbon fixation in photosynthetic organisms	Energy metabolism
T01-03_TRINITY_DN24725_c0_g1_i1	ko00130	Ubiquinone and other terpenoid-quinone biosynthesis	Metabolism of cofactors and vitamins
T01-03_TRINITY_DN24725_c1_g1_i2	ko00760	Nicotinate and nicotinamide metabolism	Metabolism of cofactors and vitamins
T01-03_TRINITY_DN24725_c1_g1_i2	ko00240	Pyrimidine metabolism	Nucleotide metabolism
T01-03_TRINITY_DN24798_c0_g1_i1	ko01040	Biosynthesis of unsaturated fatty acids	Lipid metabolism
T01-03_TRINITY_DN2480_c1_g1_i5	ko00904	Diterpenoid biosynthesis	Metabolism of terpenoids and polyketides
T01-03_TRINITY_DN2488_c0_g1_i7	ko00260	Glycine, serine and threonine metabolism	Amino acid metabolism
T01-03_TRINITY_DN2488_c0_g1_i7	ko00630	Glyoxylate and dicarboxylate metabolism	Carbohydrate metabolism
T01-03_TRINITY_DN2488_c0_g1_i7	ko00680	Methane metabolism	Energy metabolism
T01-03_TRINITY_DN2488_c0_g1_i7	ko00670	One carbon pool by folate	Metabolism of cofactors and vitamins
T01-03_TRINITY_DN2488_c0_g1_i7	ko00460	Cyanoamino acid metabolism	Metabolism of other amino acids
T01-03_TRINITY_DN24920_c0_g1_i1	ko00592	alpha-Linolenic acid metabolism	Lipid metabolism
T01-03_TRINITY_DN2493_c0_g1_i1	ko01062	Biosynthesis of terpenoids and steroids	Chemical structure transformation maps
T01-03_TRINITY_DN2493_c0_g1_i1	ko00906	Carotenoid biosynthesis	Metabolism of terpenoids and polyketides
T01-03_TRINITY_DN24979_c0_g2_i1	ko00330	Arginine and proline metabolism	Amino acid metabolism
T01-03_TRINITY_DN24979_c0_g2_i1	ko00360	Phenylalanine metabolism	Amino acid metabolism
T01-03_TRINITY_DN24979_c0_g2_i1	ko00380	Tryptophan metabolism	Amino acid metabolism
T01-03_TRINITY_DN24979_c0_g2_i1	ko00627	Aminobenzoate degradation	Xenobiotics biodegradation and metabolism
T01-03_TRINITY_DN24979_c0_g2_i1	ko00643	Styrene degradation	Xenobiotics biodegradation and metabolism
T01-03_TRINITY_DN25019_c0_g1_i32	ko00900	Terpenoid backbone biosynthesis	Metabolism of terpenoids and polyketides
T01-03_TRINITY_DN2506_c2_g1_i1	ko00520	Amino sugar and nucleotide sugar metabolism	Carbohydrate metabolism
T01-03_TRINITY_DN2506_c4_g1_i1	ko00230	Purine metabolism	Nucleotide metabolism
T01-03_TRINITY_DN2506_c4_g1_i1	ko00240	Pyrimidine metabolism	Nucleotide metabolism
T01-03_TRINITY_DN2506_c4_g1_i1	ko00983	Drug metabolism - other enzymes	Xenobiotics biodegradation and metabolism
T01-03_TRINITY_DN2509_c0_g1_i2	ko00561	Glycerolipid metabolism	Lipid metabolism
T01-03_TRINITY_DN2509_c0_g1_i2	ko00564	Glycerophospholipid metabolism	Lipid metabolism
T01-03_TRINITY_DN2509_c0_g2_i2	ko00561	Glycerolipid metabolism	Lipid metabolism
T01-03_TRINITY_DN2509_c0_g2_i2	ko00564	Glycerophospholipid metabolism	Lipid metabolism
T01-03_TRINITY_DN2511_c0_g1_i11	ko00500	Starch and sucrose metabolism	Carbohydrate metabolism
T01-03_TRINITY_DN2511_c0_g3_i1	ko00500	Starch and sucrose metabolism	Carbohydrate metabolism
T01-03_TRINITY_DN25227_c1_g1_i1	ko00770	Pantothenate and CoA biosynthesis	Metabolism of cofactors and vitamins
T01-03_TRINITY_DN2523_c0_g1_i8	ko00052	Galactose metabolism	Carbohydrate metabolism
T01-03_TRINITY_DN25273_c0_g1_i2	ko00040	Pentose and glucuronate interconversions	Carbohydrate metabolism
T01-03_TRINITY_DN2529_c0_g3_i1	ko00196	Photosynthesis - antenna proteins	Energy metabolism
T01-03_TRINITY_DN253_c1_g1_i2	ko00250	Alanine, aspartate and glutamate metabolism	Amino acid metabolism
T01-03_TRINITY_DN253_c1_g1_i2	ko00230	Purine metabolism	Nucleotide metabolism
T01-03_TRINITY_DN25329_c1_g1_i2	ko00900	Terpenoid backbone biosynthesis	Metabolism of terpenoids and polyketides
T01-03_TRINITY_DN25334_c0_g2_i1	ko00450	Selenocompound metabolism	Metabolism of other amino acids
T01-03_TRINITY_DN2534_c1_g1_i1	ko00520	Amino sugar and nucleotide sugar metabolism	Carbohydrate metabolism
T01-03_TRINITY_DN2534_c1_g2_i1	ko00520	Amino sugar and nucleotide sugar metabolism	Carbohydrate metabolism
T01-03_TRINITY_DN2536_c1_g1_i9	ko00030	Pentose phosphate pathway	Carbohydrate metabolism
T01-03_TRINITY_DN2536_c1_g1_i9	ko00480	Glutathione metabolism	Metabolism of other amino acids
T01-03_TRINITY_DN2538_c1_g1_i1	ko00250	Alanine, aspartate and glutamate metabolism	Amino acid metabolism
T01-03_TRINITY_DN2538_c1_g1_i1	ko00650	Butanoate metabolism	Carbohydrate metabolism
T01-03_TRINITY_DN25382_c0_g1_i1	ko00270	Cysteine and methionine metabolism	Amino acid metabolism
T01-03_TRINITY_DN25382_c0_g1_i1	ko00350	Tyrosine metabolism	Amino acid metabolism
T01-03_TRINITY_DN25382_c0_g1_i1	ko00360	Phenylalanine metabolism	Amino acid metabolism
T01-03_TRINITY_DN25382_c0_g1_i1	ko00400	Phenylalanine, tyrosine and tryptophan biosynthesis	Amino acid metabolism
T01-03_TRINITY_DN25382_c0_g1_i1	ko00401	Novobiocin biosynthesis	Biosynthesis of other secondary metabolites
T01-03_TRINITY_DN25382_c0_g1_i1	ko00950	Isoquinoline alkaloid biosynthesis	Biosynthesis of other secondary metabolites
T01-03_TRINITY_DN25382_c0_g1_i1	ko00960	Tropane, piperidine and pyridine alkaloid biosynthesis	Biosynthesis of other secondary metabolites
T01-03_TRINITY_DN25382_c0_g1_i1	ko00130	Ubiquinone and other terpenoid-quinone biosynthesis	Metabolism of cofactors and vitamins
T01-03_TRINITY_DN2543_c0_g1_i1	ko00260	Glycine, serine and threonine metabolism	Amino acid metabolism
T01-03_TRINITY_DN2543_c0_g1_i1	ko00680	Methane metabolism	Energy metabolism
T01-03_TRINITY_DN25448_c0_g1_i1	ko00591	Linoleic acid metabolism	Lipid metabolism
T01-03_TRINITY_DN25448_c0_g1_i1	ko00592	alpha-Linolenic acid metabolism	Lipid metabolism
T01-03_TRINITY_DN25514_c0_g1_i1	ko00790	Folate biosynthesis	Metabolism of cofactors and vitamins
T01-03_TRINITY_DN2555_c0_g1_i4	ko00400	Phenylalanine, tyrosine and tryptophan biosynthesis	Amino acid metabolism
T01-03_TRINITY_DN2560_c1_g1_i1	ko00450	Selenocompound metabolism	Metabolism of other amino acids
T01-03_TRINITY_DN25610_c0_g1_i1	ko00020	Citrate cycle (TCA cycle)	Carbohydrate metabolism
T01-03_TRINITY_DN25610_c0_g1_i1	ko00720	Carbon fixation pathways in prokaryotes	Energy metabolism
T01-03_TRINITY_DN2563_c0_g2_i1	ko00520	Amino sugar and nucleotide sugar metabolism	Carbohydrate metabolism
T01-03_TRINITY_DN2563_c1_g1_i2	ko00790	Folate biosynthesis	Metabolism of cofactors and vitamins
T01-03_TRINITY_DN2564_c2_g1_i1	ko00010	Glycolysis / Gluconeogenesis	Carbohydrate metabolism
T01-03_TRINITY_DN2564_c2_g1_i1	ko00040	Pentose and glucuronate interconversions	Carbohydrate metabolism
T01-03_TRINITY_DN2564_c2_g1_i1	ko00561	Glycerolipid metabolism	Lipid metabolism
T01-03_TRINITY_DN2564_c2_g1_i1	ko00930	Caprolactam degradation	Xenobiotics biodegradation and metabolism
T01-03_TRINITY_DN2567_c0_g1_i1	ko00330	Arginine and proline metabolism	Amino acid metabolism
T01-03_TRINITY_DN25725_c0_g1_i6	ko00051	Fructose and mannose metabolism	Carbohydrate metabolism
T01-03_TRINITY_DN25725_c0_g1_i6	ko00520	Amino sugar and nucleotide sugar metabolism	Carbohydrate metabolism
T01-03_TRINITY_DN2577_c0_g1_i16	ko00260	Glycine, serine and threonine metabolism	Amino acid metabolism
T01-03_TRINITY_DN2577_c0_g1_i16	ko00270	Cysteine and methionine metabolism	Amino acid metabolism
T01-03_TRINITY_DN2577_c0_g1_i16	ko00300	Lysine biosynthesis	Amino acid metabolism
T01-03_TRINITY_DN2577_c0_g1_i16	ko00261	Monobactam biosynthesis	Biosynthesis of other secondary metabolites
T01-03_TRINITY_DN2577_c0_g2_i3	ko00260	Glycine, serine and threonine metabolism	Amino acid metabolism
T01-03_TRINITY_DN2577_c0_g2_i3	ko00350	Tyrosine metabolism	Amino acid metabolism
T01-03_TRINITY_DN2577_c0_g2_i3	ko00360	Phenylalanine metabolism	Amino acid metabolism
T01-03_TRINITY_DN2577_c0_g2_i3	ko00950	Isoquinoline alkaloid biosynthesis	Biosynthesis of other secondary metabolites
T01-03_TRINITY_DN2577_c0_g2_i3	ko00960	Tropane, piperidine and pyridine alkaloid biosynthesis	Biosynthesis of other secondary metabolites
T01-03_TRINITY_DN2577_c0_g2_i3	ko00410	beta-Alanine metabolism	Metabolism of other amino acids
T01-03_TRINITY_DN25886_c0_g1_i1	ko00051	Fructose and mannose metabolism	Carbohydrate metabolism
T01-03_TRINITY_DN259_c1_g2_i1	ko00500	Starch and sucrose metabolism	Carbohydrate metabolism
T01-03_TRINITY_DN2593_c0_g1_i16	ko00940	Phenylpropanoid biosynthesis	Biosynthesis of other secondary metabolites
T01-03_TRINITY_DN2593_c0_g1_i16	ko00500	Starch and sucrose metabolism	Carbohydrate metabolism
T01-03_TRINITY_DN2593_c0_g1_i16	ko00460	Cyanoamino acid metabolism	Metabolism of other amino acids
T01-03_TRINITY_DN2600_c0_g1_i7	ko00190	Oxidative phosphorylation	Energy metabolism
T01-03_TRINITY_DN2609_c1_g1_i1	ko00190	Oxidative phosphorylation	Energy metabolism
T01-03_TRINITY_DN2610_c0_g1_i6	ko00550	Peptidoglycan biosynthesis	Glycan biosynthesis and metabolism
T01-03_TRINITY_DN2610_c0_g3_i2	ko00550	Peptidoglycan biosynthesis	Glycan biosynthesis and metabolism
T01-03_TRINITY_DN2614_c2_g1_i1	ko00730	Thiamine metabolism	Metabolism of cofactors and vitamins
T01-03_TRINITY_DN2614_c2_g1_i1	ko00230	Purine metabolism	Nucleotide metabolism
T01-03_TRINITY_DN26151_c0_g1_i1	ko00230	Purine metabolism	Nucleotide metabolism
T01-03_TRINITY_DN26151_c0_g1_i1	ko00240	Pyrimidine metabolism	Nucleotide metabolism
T01-03_TRINITY_DN2618_c0_g1_i4	ko00564	Glycerophospholipid metabolism	Lipid metabolism
T01-03_TRINITY_DN2618_c0_g1_i4	ko00440	Phosphonate and phosphinate metabolism	Metabolism of other amino acids
T01-03_TRINITY_DN2618_c0_g2_i1	ko00564	Glycerophospholipid metabolism	Lipid metabolism
T01-03_TRINITY_DN2618_c0_g2_i1	ko00440	Phosphonate and phosphinate metabolism	Metabolism of other amino acids
T01-03_TRINITY_DN262_c0_g2_i7	ko00620	Pyruvate metabolism	Carbohydrate metabolism
T01-03_TRINITY_DN262_c0_g2_i7	ko00710	Carbon fixation in photosynthetic organisms	Energy metabolism
T01-03_TRINITY_DN262_c1_g1_i1	ko00220	Arginine biosynthesis	Amino acid metabolism
T01-03_TRINITY_DN262_c1_g1_i1	ko00250	Alanine, aspartate and glutamate metabolism	Amino acid metabolism
T01-03_TRINITY_DN262_c1_g1_i1	ko00270	Cysteine and methionine metabolism	Amino acid metabolism
T01-03_TRINITY_DN262_c1_g1_i1	ko00330	Arginine and proline metabolism	Amino acid metabolism
T01-03_TRINITY_DN262_c1_g1_i1	ko00350	Tyrosine metabolism	Amino acid metabolism
T01-03_TRINITY_DN262_c1_g1_i1	ko00360	Phenylalanine metabolism	Amino acid metabolism
T01-03_TRINITY_DN262_c1_g1_i1	ko00400	Phenylalanine, tyrosine and tryptophan biosynthesis	Amino acid metabolism
T01-03_TRINITY_DN262_c1_g1_i1	ko00950	Isoquinoline alkaloid biosynthesis	Biosynthesis of other secondary metabolites
T01-03_TRINITY_DN262_c1_g1_i1	ko00960	Tropane, piperidine and pyridine alkaloid biosynthesis	Biosynthesis of other secondary metabolites
T01-03_TRINITY_DN262_c1_g1_i1	ko00710	Carbon fixation in photosynthetic organisms	Energy metabolism
T01-03_TRINITY_DN2621_c4_g1_i3	ko00520	Amino sugar and nucleotide sugar metabolism	Carbohydrate metabolism
T01-03_TRINITY_DN26255_c0_g2_i1	ko00620	Pyruvate metabolism	Carbohydrate metabolism
T01-03_TRINITY_DN26255_c0_g2_i1	ko00640	Propanoate metabolism	Carbohydrate metabolism
T01-03_TRINITY_DN26255_c0_g2_i1	ko00195	Photosynthesis	Energy metabolism
T01-03_TRINITY_DN26255_c0_g2_i1	ko00720	Carbon fixation pathways in prokaryotes	Energy metabolism
T01-03_TRINITY_DN26255_c0_g2_i1	ko00061	Fatty acid biosynthesis	Lipid metabolism
T01-03_TRINITY_DN26296_c0_g1_i1	ko00010	Glycolysis / Gluconeogenesis	Carbohydrate metabolism
T01-03_TRINITY_DN26296_c0_g1_i1	ko00020	Citrate cycle (TCA cycle)	Carbohydrate metabolism
T01-03_TRINITY_DN26296_c0_g1_i1	ko00620	Pyruvate metabolism	Carbohydrate metabolism
T01-03_TRINITY_DN2630_c0_g1_i3	ko00260	Glycine, serine and threonine metabolism	Amino acid metabolism
T01-03_TRINITY_DN2630_c0_g1_i3	ko00680	Methane metabolism	Energy metabolism
T01-03_TRINITY_DN2631_c0_g1_i1	ko00195	Photosynthesis	Energy metabolism
T01-03_TRINITY_DN26381_c0_g1_i1	ko00600	Sphingolipid metabolism	Lipid metabolism
T01-03_TRINITY_DN26425_c0_g1_i2	ko00260	Glycine, serine and threonine metabolism	Amino acid metabolism
T01-03_TRINITY_DN26425_c0_g1_i2	ko00630	Glyoxylate and dicarboxylate metabolism	Carbohydrate metabolism
T01-03_TRINITY_DN26425_c0_g1_i2	ko00670	One carbon pool by folate	Metabolism of cofactors and vitamins
T01-03_TRINITY_DN2643_c2_g1_i1	ko00330	Arginine and proline metabolism	Amino acid metabolism
T01-03_TRINITY_DN2646_c1_g1_i6	ko00100	Steroid biosynthesis	Lipid metabolism
T01-03_TRINITY_DN2650_c1_g1_i2	ko00240	Pyrimidine metabolism	Nucleotide metabolism
T01-03_TRINITY_DN2650_c1_g1_i2	ko00983	Drug metabolism - other enzymes	Xenobiotics biodegradation and metabolism
T01-03_TRINITY_DN26571_c1_g1_i1	ko00020	Citrate cycle (TCA cycle)	Carbohydrate metabolism
T01-03_TRINITY_DN26571_c1_g1_i1	ko00190	Oxidative phosphorylation	Energy metabolism
T01-03_TRINITY_DN26585_c0_g1_i3	ko00945	Stilbenoid, diarylheptanoid and gingerol biosynthesis	Biosynthesis of other secondary metabolites
T01-03_TRINITY_DN2660_c0_g1_i43	ko00010	Glycolysis / Gluconeogenesis	Carbohydrate metabolism
T01-03_TRINITY_DN2660_c0_g1_i43	ko00040	Pentose and glucuronate interconversions	Carbohydrate metabolism
T01-03_TRINITY_DN2660_c0_g1_i43	ko00051	Fructose and mannose metabolism	Carbohydrate metabolism
T01-03_TRINITY_DN2660_c0_g1_i43	ko00052	Galactose metabolism	Carbohydrate metabolism
T01-03_TRINITY_DN2660_c0_g1_i43	ko00561	Glycerolipid metabolism	Lipid metabolism
T01-03_TRINITY_DN2660_c0_g1_i43	ko00790	Folate biosynthesis	Metabolism of cofactors and vitamins
T01-03_TRINITY_DN2660_c0_g1_i43	ko00930	Caprolactam degradation	Xenobiotics biodegradation and metabolism
T01-03_TRINITY_DN26721_c1_g4_i1	ko00230	Purine metabolism	Nucleotide metabolism
T01-03_TRINITY_DN26721_c1_g4_i1	ko00240	Pyrimidine metabolism	Nucleotide metabolism
T01-03_TRINITY_DN2677_c7_g1_i2	ko00600	Sphingolipid metabolism	Lipid metabolism
T01-03_TRINITY_DN268_c3_g1_i1	ko00909	Sesquiterpenoid and triterpenoid biosynthesis	Metabolism of terpenoids and polyketides
T01-03_TRINITY_DN2682_c1_g1_i8	ko00750	Vitamin B6 metabolism	Metabolism of cofactors and vitamins
T01-03_TRINITY_DN26843_c0_g1_i1	ko00941	Flavonoid biosynthesis	Biosynthesis of other secondary metabolites
T01-03_TRINITY_DN2686_c0_g3_i1	ko00620	Pyruvate metabolism	Carbohydrate metabolism
T01-03_TRINITY_DN2686_c0_g5_i1	ko00620	Pyruvate metabolism	Carbohydrate metabolism
T01-03_TRINITY_DN269_c0_g2_i2	ko00564	Glycerophospholipid metabolism	Lipid metabolism
T01-03_TRINITY_DN269_c0_g3_i1	ko00562	Inositol phosphate metabolism	Carbohydrate metabolism
T01-03_TRINITY_DN2690_c0_g2_i1	ko00520	Amino sugar and nucleotide sugar metabolism	Carbohydrate metabolism
T01-03_TRINITY_DN26910_c0_g2_i1	ko00190	Oxidative phosphorylation	Energy metabolism
T01-03_TRINITY_DN26910_c0_g2_i1	ko00195	Photosynthesis	Energy metabolism
T01-03_TRINITY_DN2697_c0_g1_i1	ko00196	Photosynthesis - antenna proteins	Energy metabolism
T01-03_TRINITY_DN270_c2_g1_i1	ko00900	Terpenoid backbone biosynthesis	Metabolism of terpenoids and polyketides
T01-03_TRINITY_DN27002_c0_g1_i1	ko00561	Glycerolipid metabolism	Lipid metabolism
T01-03_TRINITY_DN27002_c0_g1_i1	ko00564	Glycerophospholipid metabolism	Lipid metabolism
T01-03_TRINITY_DN2701_c0_g2_i3	ko00053	Ascorbate and aldarate metabolism	Carbohydrate metabolism
T01-03_TRINITY_DN2701_c0_g2_i3	ko00520	Amino sugar and nucleotide sugar metabolism	Carbohydrate metabolism
T01-03_TRINITY_DN2701_c2_g1_i1	ko00900	Terpenoid backbone biosynthesis	Metabolism of terpenoids and polyketides
T01-03_TRINITY_DN2702_c0_g1_i5	ko00564	Glycerophospholipid metabolism	Lipid metabolism
T01-03_TRINITY_DN2705_c6_g1_i1	ko00260	Glycine, serine and threonine metabolism	Amino acid metabolism
T01-03_TRINITY_DN2705_c6_g1_i1	ko00280	Valine, leucine and isoleucine degradation	Amino acid metabolism
T01-03_TRINITY_DN2705_c6_g1_i1	ko00010	Glycolysis / Gluconeogenesis	Carbohydrate metabolism
T01-03_TRINITY_DN2705_c6_g1_i1	ko00020	Citrate cycle (TCA cycle)	Carbohydrate metabolism
T01-03_TRINITY_DN2705_c6_g1_i1	ko00620	Pyruvate metabolism	Carbohydrate metabolism
T01-03_TRINITY_DN2705_c6_g1_i1	ko00630	Glyoxylate and dicarboxylate metabolism	Carbohydrate metabolism
T01-03_TRINITY_DN2705_c6_g1_i1	ko00640	Propanoate metabolism	Carbohydrate metabolism
T01-03_TRINITY_DN2706_c0_g2_i2	ko00020	Citrate cycle (TCA cycle)	Carbohydrate metabolism
T01-03_TRINITY_DN2706_c0_g2_i2	ko00630	Glyoxylate and dicarboxylate metabolism	Carbohydrate metabolism
T01-03_TRINITY_DN2706_c0_g2_i2	ko00720	Carbon fixation pathways in prokaryotes	Energy metabolism
T01-03_TRINITY_DN2706_c0_g3_i2	ko00020	Citrate cycle (TCA cycle)	Carbohydrate metabolism
T01-03_TRINITY_DN2706_c0_g3_i2	ko00630	Glyoxylate and dicarboxylate metabolism	Carbohydrate metabolism
T01-03_TRINITY_DN2706_c0_g3_i2	ko00720	Carbon fixation pathways in prokaryotes	Energy metabolism
T01-03_TRINITY_DN27068_c0_g1_i2	ko00310	Lysine degradation	Amino acid metabolism
T01-03_TRINITY_DN2709_c0_g1_i4	ko00010	Glycolysis / Gluconeogenesis	Carbohydrate metabolism
T01-03_TRINITY_DN2709_c0_g1_i4	ko00020	Citrate cycle (TCA cycle)	Carbohydrate metabolism
T01-03_TRINITY_DN2709_c0_g1_i4	ko00620	Pyruvate metabolism	Carbohydrate metabolism
T01-03_TRINITY_DN2723_c0_g1_i4	ko00190	Oxidative phosphorylation	Energy metabolism
T01-03_TRINITY_DN2724_c0_g1_i1	ko00010	Glycolysis / Gluconeogenesis	Carbohydrate metabolism
T01-03_TRINITY_DN2724_c0_g1_i1	ko00030	Pentose phosphate pathway	Carbohydrate metabolism
T01-03_TRINITY_DN2724_c0_g1_i1	ko00051	Fructose and mannose metabolism	Carbohydrate metabolism
T01-03_TRINITY_DN2724_c0_g1_i1	ko00680	Methane metabolism	Energy metabolism
T01-03_TRINITY_DN2724_c0_g1_i1	ko00710	Carbon fixation in photosynthetic organisms	Energy metabolism
T01-03_TRINITY_DN27364_c0_g1_i1	ko00480	Glutathione metabolism	Metabolism of other amino acids
T01-03_TRINITY_DN27364_c0_g1_i1	ko00980	Metabolism of xenobiotics by cytochrome P450	Xenobiotics biodegradation and metabolism
T01-03_TRINITY_DN27364_c0_g1_i1	ko00982	Drug metabolism - cytochrome P450	Xenobiotics biodegradation and metabolism
T01-03_TRINITY_DN27364_c0_g1_i1	ko00983	Drug metabolism - other enzymes	Xenobiotics biodegradation and metabolism
T01-03_TRINITY_DN27374_c0_g1_i1	ko00270	Cysteine and methionine metabolism	Amino acid metabolism
T01-03_TRINITY_DN274_c3_g1_i3	ko00620	Pyruvate metabolism	Carbohydrate metabolism
T01-03_TRINITY_DN274_c3_g1_i3	ko00640	Propanoate metabolism	Carbohydrate metabolism
T01-03_TRINITY_DN274_c3_g1_i3	ko00720	Carbon fixation pathways in prokaryotes	Energy metabolism
T01-03_TRINITY_DN274_c3_g1_i3	ko00061	Fatty acid biosynthesis	Lipid metabolism
T01-03_TRINITY_DN275_c0_g1_i1	ko00030	Pentose phosphate pathway	Carbohydrate metabolism
T01-03_TRINITY_DN2763_c0_g1_i1	ko00053	Ascorbate and aldarate metabolism	Carbohydrate metabolism
T01-03_TRINITY_DN2763_c0_g1_i1	ko00562	Inositol phosphate metabolism	Carbohydrate metabolism
T01-03_TRINITY_DN27672_c1_g1_i1	ko00030	Pentose phosphate pathway	Carbohydrate metabolism
T01-03_TRINITY_DN27672_c1_g1_i1	ko00710	Carbon fixation in photosynthetic organisms	Energy metabolism
T01-03_TRINITY_DN27707_c0_g1_i2	ko00190	Oxidative phosphorylation	Energy metabolism
T01-03_TRINITY_DN27707_c3_g1_i1	ko00190	Oxidative phosphorylation	Energy metabolism
T01-03_TRINITY_DN2771_c0_g1_i1	ko00030	Pentose phosphate pathway	Carbohydrate metabolism
T01-03_TRINITY_DN2771_c0_g1_i1	ko00040	Pentose and glucuronate interconversions	Carbohydrate metabolism
T01-03_TRINITY_DN2771_c0_g1_i1	ko00710	Carbon fixation in photosynthetic organisms	Energy metabolism
T01-03_TRINITY_DN2772_c0_g1_i1	ko00061	Fatty acid biosynthesis	Lipid metabolism
T01-03_TRINITY_DN2772_c0_g1_i1	ko00780	Biotin metabolism	Metabolism of cofactors and vitamins
T01-03_TRINITY_DN2772_c0_g2_i1	ko00061	Fatty acid biosynthesis	Lipid metabolism
T01-03_TRINITY_DN2772_c0_g2_i1	ko00780	Biotin metabolism	Metabolism of cofactors and vitamins
T01-03_TRINITY_DN2772_c0_g3_i1	ko00061	Fatty acid biosynthesis	Lipid metabolism
T01-03_TRINITY_DN2772_c0_g3_i1	ko00780	Biotin metabolism	Metabolism of cofactors and vitamins
T01-03_TRINITY_DN27743_c0_g1_i11	ko00900	Terpenoid backbone biosynthesis	Metabolism of terpenoids and polyketides
T01-03_TRINITY_DN2775_c0_g2_i15	ko00230	Purine metabolism	Nucleotide metabolism
T01-03_TRINITY_DN2775_c0_g2_i15	ko00240	Pyrimidine metabolism	Nucleotide metabolism
T01-03_TRINITY_DN27788_c1_g2_i1	ko00500	Starch and sucrose metabolism	Carbohydrate metabolism
T01-03_TRINITY_DN27795_c0_g1_i1	ko00051	Fructose and mannose metabolism	Carbohydrate metabolism
T01-03_TRINITY_DN27795_c0_g1_i1	ko00520	Amino sugar and nucleotide sugar metabolism	Carbohydrate metabolism
T01-03_TRINITY_DN27839_c0_g1_i1	ko00760	Nicotinate and nicotinamide metabolism	Metabolism of cofactors and vitamins
T01-03_TRINITY_DN27840_c0_g1_i5	ko00220	Arginine biosynthesis	Amino acid metabolism
T01-03_TRINITY_DN27954_c0_g1_i1	ko00051	Fructose and mannose metabolism	Carbohydrate metabolism
T01-03_TRINITY_DN27954_c0_g1_i1	ko00500	Starch and sucrose metabolism	Carbohydrate metabolism
T01-03_TRINITY_DN27954_c0_g1_i1	ko00520	Amino sugar and nucleotide sugar metabolism	Carbohydrate metabolism
T01-03_TRINITY_DN27962_c0_g1_i1	ko00940	Phenylpropanoid biosynthesis	Biosynthesis of other secondary metabolites
T01-03_TRINITY_DN2801_c1_g1_i1	ko00260	Glycine, serine and threonine metabolism	Amino acid metabolism
T01-03_TRINITY_DN2801_c1_g1_i1	ko00630	Glyoxylate and dicarboxylate metabolism	Carbohydrate metabolism
T01-03_TRINITY_DN2801_c2_g1_i1	ko00730	Thiamine metabolism	Metabolism of cofactors and vitamins
T01-03_TRINITY_DN2801_c2_g1_i1	ko00230	Purine metabolism	Nucleotide metabolism
T01-03_TRINITY_DN2808_c0_g1_i2	ko00590	Arachidonic acid metabolism	Lipid metabolism
T01-03_TRINITY_DN2815_c0_g1_i2	ko00564	Glycerophospholipid metabolism	Lipid metabolism
T01-03_TRINITY_DN2815_c0_g1_i2	ko00565	Ether lipid metabolism	Lipid metabolism
T01-03_TRINITY_DN282_c0_g1_i1	ko00020	Citrate cycle (TCA cycle)	Carbohydrate metabolism
T01-03_TRINITY_DN282_c0_g1_i1	ko00720	Carbon fixation pathways in prokaryotes	Energy metabolism
T01-03_TRINITY_DN2821_c0_g1_i1	ko00480	Glutathione metabolism	Metabolism of other amino acids
T01-03_TRINITY_DN283_c0_g1_i4	ko00550	Peptidoglycan biosynthesis	Glycan biosynthesis and metabolism
T01-03_TRINITY_DN2834_c0_g2_i2	ko00020	Citrate cycle (TCA cycle)	Carbohydrate metabolism
T01-03_TRINITY_DN2836_c0_g1_i5	ko00130	Ubiquinone and other terpenoid-quinone biosynthesis	Metabolism of cofactors and vitamins
T01-03_TRINITY_DN28393_c2_g1_i1	ko00230	Purine metabolism	Nucleotide metabolism
T01-03_TRINITY_DN2843_c0_g1_i11	ko00240	Pyrimidine metabolism	Nucleotide metabolism
T01-03_TRINITY_DN2846_c2_g1_i3	ko00380	Tryptophan metabolism	Amino acid metabolism
T01-03_TRINITY_DN2846_c2_g1_i3	ko00966	Glucosinolate biosynthesis	Biosynthesis of other secondary metabolites
T01-03_TRINITY_DN285_c0_g1_i8	ko00190	Oxidative phosphorylation	Energy metabolism
T01-03_TRINITY_DN28529_c0_g1_i1	ko00270	Cysteine and methionine metabolism	Amino acid metabolism
T01-03_TRINITY_DN2856_c0_g1_i1	ko00190	Oxidative phosphorylation	Energy metabolism
T01-03_TRINITY_DN28670_c0_g1_i1	ko00940	Phenylpropanoid biosynthesis	Biosynthesis of other secondary metabolites
T01-03_TRINITY_DN287_c0_g2_i4	ko00350	Tyrosine metabolism	Amino acid metabolism
T01-03_TRINITY_DN287_c0_g2_i4	ko00643	Styrene degradation	Xenobiotics biodegradation and metabolism
T01-03_TRINITY_DN287_c1_g1_i22	ko00790	Folate biosynthesis	Metabolism of cofactors and vitamins
T01-03_TRINITY_DN2870_c0_g2_i1	ko00730	Thiamine metabolism	Metabolism of cofactors and vitamins
T01-03_TRINITY_DN2872_c2_g1_i1	ko00260	Glycine, serine and threonine metabolism	Amino acid metabolism
T01-03_TRINITY_DN2872_c2_g1_i1	ko00750	Vitamin B6 metabolism	Metabolism of cofactors and vitamins
T01-03_TRINITY_DN28764_c1_g1_i1	ko00190	Oxidative phosphorylation	Energy metabolism
T01-03_TRINITY_DN2877_c1_g1_i1	ko00240	Pyrimidine metabolism	Nucleotide metabolism
T01-03_TRINITY_DN2879_c2_g2_i1	ko00400	Phenylalanine, tyrosine and tryptophan biosynthesis	Amino acid metabolism
T01-03_TRINITY_DN2893_c1_g1_i1	ko00520	Amino sugar and nucleotide sugar metabolism	Carbohydrate metabolism
T01-03_TRINITY_DN2894_c0_g1_i30	ko00500	Starch and sucrose metabolism	Carbohydrate metabolism
T01-03_TRINITY_DN29089_c0_g1_i2	ko00260	Glycine, serine and threonine metabolism	Amino acid metabolism
T01-03_TRINITY_DN29089_c0_g1_i2	ko00280	Valine, leucine and isoleucine degradation	Amino acid metabolism
T01-03_TRINITY_DN29089_c0_g1_i2	ko00310	Lysine degradation	Amino acid metabolism
T01-03_TRINITY_DN29089_c0_g1_i2	ko00330	Arginine and proline metabolism	Amino acid metabolism
T01-03_TRINITY_DN29089_c0_g1_i2	ko00340	Histidine metabolism	Amino acid metabolism
T01-03_TRINITY_DN29089_c0_g1_i2	ko00380	Tryptophan metabolism	Amino acid metabolism
T01-03_TRINITY_DN29089_c0_g1_i2	ko00010	Glycolysis / Gluconeogenesis	Carbohydrate metabolism
T01-03_TRINITY_DN29089_c0_g1_i2	ko00053	Ascorbate and aldarate metabolism	Carbohydrate metabolism
T01-03_TRINITY_DN29089_c0_g1_i2	ko00620	Pyruvate metabolism	Carbohydrate metabolism
T01-03_TRINITY_DN29089_c0_g1_i2	ko00071	Fatty acid degradation	Lipid metabolism
T01-03_TRINITY_DN29089_c0_g1_i2	ko00561	Glycerolipid metabolism	Lipid metabolism
T01-03_TRINITY_DN29089_c0_g1_i2	ko00410	beta-Alanine metabolism	Metabolism of other amino acids
T01-03_TRINITY_DN2910_c0_g1_i2	ko00340	Histidine metabolism	Amino acid metabolism
T01-03_TRINITY_DN2917_c0_g1_i2	ko00905	Brassinosteroid biosynthesis	Metabolism of terpenoids and polyketides
T01-03_TRINITY_DN2917_c1_g4_i1	ko00270	Cysteine and methionine metabolism	Amino acid metabolism
T01-03_TRINITY_DN2917_c1_g4_i1	ko00920	Sulfur metabolism	Energy metabolism
T01-03_TRINITY_DN2924_c0_g1_i21	ko00052	Galactose metabolism	Carbohydrate metabolism
T01-03_TRINITY_DN29318_c0_g1_i1	ko00270	Cysteine and methionine metabolism	Amino acid metabolism
T01-03_TRINITY_DN29318_c0_g1_i1	ko00920	Sulfur metabolism	Energy metabolism
T01-03_TRINITY_DN29318_c0_g1_i1	ko00450	Selenocompound metabolism	Metabolism of other amino acids
T01-03_TRINITY_DN29328_c0_g1_i1	ko00500	Starch and sucrose metabolism	Carbohydrate metabolism
T01-03_TRINITY_DN2933_c0_g1_i1	ko00740	Riboflavin metabolism	Metabolism of cofactors and vitamins
T01-03_TRINITY_DN29442_c0_g1_i2	ko00540	Lipopolysaccharide biosynthesis	Glycan biosynthesis and metabolism
T01-03_TRINITY_DN29574_c1_g1_i1	ko00520	Amino sugar and nucleotide sugar metabolism	Carbohydrate metabolism
T01-03_TRINITY_DN2958_c1_g1_i1	ko00450	Selenocompound metabolism	Metabolism of other amino acids
T01-03_TRINITY_DN2959_c0_g1_i3	ko00510	N-Glycan biosynthesis	Glycan biosynthesis and metabolism
T01-03_TRINITY_DN2959_c0_g1_i3	ko00513	Various types of N-glycan biosynthesis	Glycan biosynthesis and metabolism
T01-03_TRINITY_DN2960_c0_g1_i4	ko00330	Arginine and proline metabolism	Amino acid metabolism
T01-03_TRINITY_DN2960_c0_g1_i4	ko00410	beta-Alanine metabolism	Metabolism of other amino acids
T01-03_TRINITY_DN2961_c0_g1_i1	ko00480	Glutathione metabolism	Metabolism of other amino acids
T01-03_TRINITY_DN2961_c0_g1_i1	ko00980	Metabolism of xenobiotics by cytochrome P450	Xenobiotics biodegradation and metabolism
T01-03_TRINITY_DN2961_c0_g1_i1	ko00982	Drug metabolism - cytochrome P450	Xenobiotics biodegradation and metabolism
T01-03_TRINITY_DN2961_c0_g1_i1	ko00983	Drug metabolism - other enzymes	Xenobiotics biodegradation and metabolism
T01-03_TRINITY_DN29614_c1_g1_i5	ko00510	N-Glycan biosynthesis	Glycan biosynthesis and metabolism
T01-03_TRINITY_DN2968_c0_g1_i5	ko00480	Glutathione metabolism	Metabolism of other amino acids
T01-03_TRINITY_DN29783_c0_g1_i1	ko00860	Porphyrin metabolism	Metabolism of cofactors and vitamins
T01-03_TRINITY_DN29854_c0_g1_i2	ko00520	Amino sugar and nucleotide sugar metabolism	Carbohydrate metabolism
T01-03_TRINITY_DN29854_c1_g1_i1	ko00520	Amino sugar and nucleotide sugar metabolism	Carbohydrate metabolism
T01-03_TRINITY_DN2986_c0_g1_i4	ko00010	Glycolysis / Gluconeogenesis	Carbohydrate metabolism
T01-03_TRINITY_DN2986_c0_g1_i4	ko00030	Pentose phosphate pathway	Carbohydrate metabolism
T01-03_TRINITY_DN2986_c0_g1_i4	ko00051	Fructose and mannose metabolism	Carbohydrate metabolism
T01-03_TRINITY_DN2986_c0_g1_i4	ko00680	Methane metabolism	Energy metabolism
T01-03_TRINITY_DN2986_c0_g1_i4	ko00710	Carbon fixation in photosynthetic organisms	Energy metabolism
T01-03_TRINITY_DN2986_c3_g1_i5	ko00010	Glycolysis / Gluconeogenesis	Carbohydrate metabolism
T01-03_TRINITY_DN2986_c3_g1_i5	ko00030	Pentose phosphate pathway	Carbohydrate metabolism
T01-03_TRINITY_DN2986_c3_g1_i5	ko00051	Fructose and mannose metabolism	Carbohydrate metabolism
T01-03_TRINITY_DN2986_c3_g1_i5	ko00680	Methane metabolism	Energy metabolism
T01-03_TRINITY_DN2986_c3_g1_i5	ko00710	Carbon fixation in photosynthetic organisms	Energy metabolism
T01-03_TRINITY_DN2987_c1_g1_i1	ko00240	Pyrimidine metabolism	Nucleotide metabolism
T01-03_TRINITY_DN2987_c1_g1_i1	ko00983	Drug metabolism - other enzymes	Xenobiotics biodegradation and metabolism
T01-03_TRINITY_DN2987_c1_g3_i1	ko00240	Pyrimidine metabolism	Nucleotide metabolism
T01-03_TRINITY_DN2987_c1_g3_i1	ko00983	Drug metabolism - other enzymes	Xenobiotics biodegradation and metabolism
T01-03_TRINITY_DN29999_c0_g1_i4	ko00270	Cysteine and methionine metabolism	Amino acid metabolism
T01-03_TRINITY_DN3004_c0_g1_i4	ko00564	Glycerophospholipid metabolism	Lipid metabolism
T01-03_TRINITY_DN3004_c0_g1_i4	ko00565	Ether lipid metabolism	Lipid metabolism
T01-03_TRINITY_DN3004_c0_g2_i4	ko00564	Glycerophospholipid metabolism	Lipid metabolism
T01-03_TRINITY_DN3004_c0_g2_i4	ko00565	Ether lipid metabolism	Lipid metabolism
T01-03_TRINITY_DN3009_c1_g1_i9	ko00460	Cyanoamino acid metabolism	Metabolism of other amino acids
T01-03_TRINITY_DN3010_c0_g2_i1	ko00190	Oxidative phosphorylation	Energy metabolism
T01-03_TRINITY_DN3022_c1_g1_i1	ko00061	Fatty acid biosynthesis	Lipid metabolism
T01-03_TRINITY_DN3026_c0_g1_i17	ko00230	Purine metabolism	Nucleotide metabolism
T01-03_TRINITY_DN3026_c0_g1_i17	ko00240	Pyrimidine metabolism	Nucleotide metabolism
T01-03_TRINITY_DN3033_c2_g1_i7	ko00500	Starch and sucrose metabolism	Carbohydrate metabolism
T01-03_TRINITY_DN3038_c0_g1_i8	ko00563	Glycosylphosphatidylinositol (GPI)-anchor biosynthesis	Glycan biosynthesis and metabolism
T01-03_TRINITY_DN3040_c0_g1_i2	ko00561	Glycerolipid metabolism	Lipid metabolism
T01-03_TRINITY_DN3040_c0_g1_i2	ko00564	Glycerophospholipid metabolism	Lipid metabolism
T01-03_TRINITY_DN3040_c0_g1_i2	ko00565	Ether lipid metabolism	Lipid metabolism
T01-03_TRINITY_DN3054_c0_g1_i4	ko00230	Purine metabolism	Nucleotide metabolism
T01-03_TRINITY_DN3054_c0_g1_i4	ko00240	Pyrimidine metabolism	Nucleotide metabolism
T01-03_TRINITY_DN3055_c0_g1_i1	ko00330	Arginine and proline metabolism	Amino acid metabolism
T01-03_TRINITY_DN3055_c0_g1_i1	ko00360	Phenylalanine metabolism	Amino acid metabolism
T01-03_TRINITY_DN3055_c0_g1_i1	ko00380	Tryptophan metabolism	Amino acid metabolism
T01-03_TRINITY_DN3055_c0_g1_i1	ko00627	Aminobenzoate degradation	Xenobiotics biodegradation and metabolism
T01-03_TRINITY_DN3055_c0_g1_i1	ko00643	Styrene degradation	Xenobiotics biodegradation and metabolism
T01-03_TRINITY_DN3060_c0_g1_i1	ko00908	Zeatin biosynthesis	Metabolism of terpenoids and polyketides
T01-03_TRINITY_DN30602_c0_g1_i2	ko00510	N-Glycan biosynthesis	Glycan biosynthesis and metabolism
T01-03_TRINITY_DN30636_c0_g1_i1	ko00220	Arginine biosynthesis	Amino acid metabolism
T01-03_TRINITY_DN30636_c0_g1_i1	ko00250	Alanine, aspartate and glutamate metabolism	Amino acid metabolism
T01-03_TRINITY_DN30636_c0_g1_i1	ko00710	Carbon fixation in photosynthetic organisms	Energy metabolism
T01-03_TRINITY_DN30669_c1_g1_i2	ko00140	Steroid hormone biosynthesis	Lipid metabolism
T01-03_TRINITY_DN30693_c0_g1_i1	ko00190	Oxidative phosphorylation	Energy metabolism
T01-03_TRINITY_DN3090_c1_g1_i2	ko00220	Arginine biosynthesis	Amino acid metabolism
T01-03_TRINITY_DN3090_c1_g1_i2	ko00250	Alanine, aspartate and glutamate metabolism	Amino acid metabolism
T01-03_TRINITY_DN3090_c1_g1_i2	ko00630	Glyoxylate and dicarboxylate metabolism	Carbohydrate metabolism
T01-03_TRINITY_DN3090_c1_g1_i2	ko00910	Nitrogen metabolism	Energy metabolism
T01-03_TRINITY_DN3090_c1_g2_i1	ko00220	Arginine biosynthesis	Amino acid metabolism
T01-03_TRINITY_DN3090_c1_g2_i1	ko00250	Alanine, aspartate and glutamate metabolism	Amino acid metabolism
T01-03_TRINITY_DN3090_c1_g2_i1	ko00630	Glyoxylate and dicarboxylate metabolism	Carbohydrate metabolism
T01-03_TRINITY_DN3090_c1_g2_i1	ko00910	Nitrogen metabolism	Energy metabolism
T01-03_TRINITY_DN3098_c0_g4_i1	ko00900	Terpenoid backbone biosynthesis	Metabolism of terpenoids and polyketides
T01-03_TRINITY_DN3112_c0_g2_i13	ko00520	Amino sugar and nucleotide sugar metabolism	Carbohydrate metabolism
T01-03_TRINITY_DN3112_c0_g3_i1	ko00520	Amino sugar and nucleotide sugar metabolism	Carbohydrate metabolism
T01-03_TRINITY_DN3119_c0_g1_i2	ko00053	Ascorbate and aldarate metabolism	Carbohydrate metabolism
T01-03_TRINITY_DN3120_c0_g1_i1	ko00230	Purine metabolism	Nucleotide metabolism
T01-03_TRINITY_DN3120_c0_g1_i1	ko00240	Pyrimidine metabolism	Nucleotide metabolism
T01-03_TRINITY_DN31297_c0_g1_i10	ko00100	Steroid biosynthesis	Lipid metabolism
T01-03_TRINITY_DN31297_c1_g1_i1	ko00100	Steroid biosynthesis	Lipid metabolism
T01-03_TRINITY_DN313_c4_g1_i3	ko00740	Riboflavin metabolism	Metabolism of cofactors and vitamins
T01-03_TRINITY_DN3136_c0_g1_i23	ko00900	Terpenoid backbone biosynthesis	Metabolism of terpenoids and polyketides
T01-03_TRINITY_DN3136_c0_g2_i1	ko00900	Terpenoid backbone biosynthesis	Metabolism of terpenoids and polyketides
T01-03_TRINITY_DN3147_c2_g1_i1	ko00010	Glycolysis / Gluconeogenesis	Carbohydrate metabolism
T01-03_TRINITY_DN3147_c2_g1_i1	ko00052	Galactose metabolism	Carbohydrate metabolism
T01-03_TRINITY_DN31480_c0_g1_i1	ko00900	Terpenoid backbone biosynthesis	Metabolism of terpenoids and polyketides
T01-03_TRINITY_DN3149_c1_g1_i9	ko00510	N-Glycan biosynthesis	Glycan biosynthesis and metabolism
T01-03_TRINITY_DN3149_c1_g1_i9	ko00513	Various types of N-glycan biosynthesis	Glycan biosynthesis and metabolism
T01-03_TRINITY_DN3152_c0_g1_i1	ko00510	N-Glycan biosynthesis	Glycan biosynthesis and metabolism
T01-03_TRINITY_DN3152_c0_g1_i1	ko00513	Various types of N-glycan biosynthesis	Glycan biosynthesis and metabolism
T01-03_TRINITY_DN3159_c0_g1_i5	ko00310	Lysine degradation	Amino acid metabolism
T01-03_TRINITY_DN3166_c5_g1_i1	ko00400	Phenylalanine, tyrosine and tryptophan biosynthesis	Amino acid metabolism
T01-03_TRINITY_DN317_c0_g1_i31	ko00521	Streptomycin biosynthesis	Biosynthesis of other secondary metabolites
T01-03_TRINITY_DN317_c0_g1_i31	ko00562	Inositol phosphate metabolism	Carbohydrate metabolism
T01-03_TRINITY_DN318_c2_g1_i1	ko00740	Riboflavin metabolism	Metabolism of cofactors and vitamins
T01-03_TRINITY_DN32115_c0_g1_i1	ko00480	Glutathione metabolism	Metabolism of other amino acids
T01-03_TRINITY_DN32115_c0_g1_i1	ko00980	Metabolism of xenobiotics by cytochrome P450	Xenobiotics biodegradation and metabolism
T01-03_TRINITY_DN32115_c0_g1_i1	ko00982	Drug metabolism - cytochrome P450	Xenobiotics biodegradation and metabolism
T01-03_TRINITY_DN32115_c0_g1_i1	ko00983	Drug metabolism - other enzymes	Xenobiotics biodegradation and metabolism
T01-03_TRINITY_DN3215_c0_g1_i3	ko00510	N-Glycan biosynthesis	Glycan biosynthesis and metabolism
T01-03_TRINITY_DN3215_c0_g1_i3	ko00513	Various types of N-glycan biosynthesis	Glycan biosynthesis and metabolism
T01-03_TRINITY_DN32150_c0_g1_i1	ko00760	Nicotinate and nicotinamide metabolism	Metabolism of cofactors and vitamins
T01-03_TRINITY_DN32150_c0_g1_i1	ko00230	Purine metabolism	Nucleotide metabolism
T01-03_TRINITY_DN32150_c0_g1_i1	ko00240	Pyrimidine metabolism	Nucleotide metabolism
T01-03_TRINITY_DN3219_c0_g1_i9	ko00510	N-Glycan biosynthesis	Glycan biosynthesis and metabolism
T01-03_TRINITY_DN3219_c0_g1_i9	ko00513	Various types of N-glycan biosynthesis	Glycan biosynthesis and metabolism
T01-03_TRINITY_DN3223_c1_g3_i2	ko00600	Sphingolipid metabolism	Lipid metabolism
T01-03_TRINITY_DN3226_c1_g1_i1	ko00230	Purine metabolism	Nucleotide metabolism
T01-03_TRINITY_DN3226_c1_g1_i1	ko00240	Pyrimidine metabolism	Nucleotide metabolism
T01-03_TRINITY_DN3226_c2_g1_i3	ko00230	Purine metabolism	Nucleotide metabolism
T01-03_TRINITY_DN3226_c2_g1_i3	ko00240	Pyrimidine metabolism	Nucleotide metabolism
T01-03_TRINITY_DN3226_c2_g3_i2	ko00230	Purine metabolism	Nucleotide metabolism
T01-03_TRINITY_DN3226_c2_g3_i2	ko00240	Pyrimidine metabolism	Nucleotide metabolism
T01-03_TRINITY_DN3226_c2_g4_i2	ko00230	Purine metabolism	Nucleotide metabolism
T01-03_TRINITY_DN3226_c2_g4_i2	ko00240	Pyrimidine metabolism	Nucleotide metabolism
T01-03_TRINITY_DN3227_c2_g1_i4	ko00061	Fatty acid biosynthesis	Lipid metabolism
T01-03_TRINITY_DN3227_c2_g1_i4	ko00071	Fatty acid degradation	Lipid metabolism
T01-03_TRINITY_DN323_c0_g1_i3	ko00790	Folate biosynthesis	Metabolism of cofactors and vitamins
T01-03_TRINITY_DN323_c0_g2_i2	ko00790	Folate biosynthesis	Metabolism of cofactors and vitamins
T01-03_TRINITY_DN3236_c1_g1_i1	ko00140	Steroid hormone biosynthesis	Lipid metabolism
T01-03_TRINITY_DN3236_c1_g1_i1	ko00460	Cyanoamino acid metabolism	Metabolism of other amino acids
T01-03_TRINITY_DN32569_c0_g1_i1	ko00908	Zeatin biosynthesis	Metabolism of terpenoids and polyketides
T01-03_TRINITY_DN326_c4_g1_i2	ko00220	Arginine biosynthesis	Amino acid metabolism
T01-03_TRINITY_DN326_c5_g1_i1	ko00500	Starch and sucrose metabolism	Carbohydrate metabolism
T01-03_TRINITY_DN32626_c0_g1_i1	ko00061	Fatty acid biosynthesis	Lipid metabolism
T01-03_TRINITY_DN32626_c0_g1_i1	ko00780	Biotin metabolism	Metabolism of cofactors and vitamins
T01-03_TRINITY_DN32634_c0_g1_i23	ko00500	Starch and sucrose metabolism	Carbohydrate metabolism
T01-03_TRINITY_DN3268_c1_g1_i1	ko00190	Oxidative phosphorylation	Energy metabolism
T01-03_TRINITY_DN3274_c0_g1_i1	ko00380	Tryptophan metabolism	Amino acid metabolism
T01-03_TRINITY_DN3274_c0_g1_i1	ko00910	Nitrogen metabolism	Energy metabolism
T01-03_TRINITY_DN3274_c0_g1_i1	ko00460	Cyanoamino acid metabolism	Metabolism of other amino acids
T01-03_TRINITY_DN3274_c0_g1_i1	ko00627	Aminobenzoate degradation	Xenobiotics biodegradation and metabolism
T01-03_TRINITY_DN3274_c0_g1_i1	ko00643	Styrene degradation	Xenobiotics biodegradation and metabolism
T01-03_TRINITY_DN3276_c0_g1_i2	ko00100	Steroid biosynthesis	Lipid metabolism
T01-03_TRINITY_DN32793_c2_g1_i1	ko00051	Fructose and mannose metabolism	Carbohydrate metabolism
T01-03_TRINITY_DN3282_c2_g1_i1	ko00500	Starch and sucrose metabolism	Carbohydrate metabolism
T01-03_TRINITY_DN3288_c0_g1_i5	ko00052	Galactose metabolism	Carbohydrate metabolism
T01-03_TRINITY_DN3288_c0_g1_i5	ko00500	Starch and sucrose metabolism	Carbohydrate metabolism
T01-03_TRINITY_DN3289_c0_g2_i15	ko00400	Phenylalanine, tyrosine and tryptophan biosynthesis	Amino acid metabolism
T01-03_TRINITY_DN32909_c0_g1_i1	ko00905	Brassinosteroid biosynthesis	Metabolism of terpenoids and polyketides
T01-03_TRINITY_DN32968_c0_g1_i1	ko00561	Glycerolipid metabolism	Lipid metabolism
T01-03_TRINITY_DN3297_c0_g1_i4	ko00400	Phenylalanine, tyrosine and tryptophan biosynthesis	Amino acid metabolism
T01-03_TRINITY_DN3308_c0_g1_i13	ko00100	Steroid biosynthesis	Lipid metabolism
T01-03_TRINITY_DN33194_c0_g1_i1	ko00270	Cysteine and methionine metabolism	Amino acid metabolism
T01-03_TRINITY_DN33194_c0_g2_i1	ko00270	Cysteine and methionine metabolism	Amino acid metabolism
T01-03_TRINITY_DN3324_c0_g1_i2	ko00563	Glycosylphosphatidylinositol (GPI)-anchor biosynthesis	Glycan biosynthesis and metabolism
T01-03_TRINITY_DN3328_c0_g1_i32	ko00230	Purine metabolism	Nucleotide metabolism
T01-03_TRINITY_DN334_c4_g1_i2	ko00196	Photosynthesis - antenna proteins	Energy metabolism
T01-03_TRINITY_DN3346_c0_g1_i1	ko00195	Photosynthesis	Energy metabolism
T01-03_TRINITY_DN335_c0_g1_i13	ko00333	Prodigiosin biosynthesis	Biosynthesis of other secondary metabolites
T01-03_TRINITY_DN335_c0_g1_i13	ko00061	Fatty acid biosynthesis	Lipid metabolism
T01-03_TRINITY_DN335_c0_g1_i13	ko00780	Biotin metabolism	Metabolism of cofactors and vitamins
T01-03_TRINITY_DN3359_c0_g2_i4	ko00062	Fatty acid elongation	Lipid metabolism
T01-03_TRINITY_DN33630_c0_g1_i1	ko00514	Other types of O-glycan biosynthesis	Glycan biosynthesis and metabolism
T01-03_TRINITY_DN33635_c0_g1_i1	ko00261	Monobactam biosynthesis	Biosynthesis of other secondary metabolites
T01-03_TRINITY_DN33635_c0_g1_i1	ko00920	Sulfur metabolism	Energy metabolism
T01-03_TRINITY_DN33635_c0_g1_i1	ko00450	Selenocompound metabolism	Metabolism of other amino acids
T01-03_TRINITY_DN33635_c0_g1_i1	ko00230	Purine metabolism	Nucleotide metabolism
T01-03_TRINITY_DN337_c3_g1_i1	ko00940	Phenylpropanoid biosynthesis	Biosynthesis of other secondary metabolites
T01-03_TRINITY_DN33729_c0_g1_i1	ko00940	Phenylpropanoid biosynthesis	Biosynthesis of other secondary metabolites
T01-03_TRINITY_DN33806_c0_g1_i1	ko00760	Nicotinate and nicotinamide metabolism	Metabolism of cofactors and vitamins
T01-03_TRINITY_DN33860_c0_g1_i2	ko00510	N-Glycan biosynthesis	Glycan biosynthesis and metabolism
T01-03_TRINITY_DN33860_c0_g1_i2	ko00513	Various types of N-glycan biosynthesis	Glycan biosynthesis and metabolism
T01-03_TRINITY_DN339_c2_g1_i1	ko00330	Arginine and proline metabolism	Amino acid metabolism
T01-03_TRINITY_DN339_c3_g1_i1	ko00520	Amino sugar and nucleotide sugar metabolism	Carbohydrate metabolism
T01-03_TRINITY_DN340_c1_g1_i3	ko00670	One carbon pool by folate	Metabolism of cofactors and vitamins
T01-03_TRINITY_DN340_c1_g1_i3	ko00790	Folate biosynthesis	Metabolism of cofactors and vitamins
T01-03_TRINITY_DN340_c1_g1_i3	ko00240	Pyrimidine metabolism	Nucleotide metabolism
T01-03_TRINITY_DN3411_c0_g1_i2	ko00564	Glycerophospholipid metabolism	Lipid metabolism
T01-03_TRINITY_DN3418_c0_g1_i1	ko00051	Fructose and mannose metabolism	Carbohydrate metabolism
T01-03_TRINITY_DN3418_c0_g1_i1	ko00500	Starch and sucrose metabolism	Carbohydrate metabolism
T01-03_TRINITY_DN3418_c0_g1_i1	ko00520	Amino sugar and nucleotide sugar metabolism	Carbohydrate metabolism
T01-03_TRINITY_DN34208_c0_g1_i1	ko00900	Terpenoid backbone biosynthesis	Metabolism of terpenoids and polyketides
T01-03_TRINITY_DN3421_c0_g1_i6	ko00052	Galactose metabolism	Carbohydrate metabolism
T01-03_TRINITY_DN3421_c0_g1_i6	ko00511	Other glycan degradation	Glycan biosynthesis and metabolism
T01-03_TRINITY_DN3421_c0_g1_i6	ko00600	Sphingolipid metabolism	Lipid metabolism
T01-03_TRINITY_DN3434_c0_g1_i1	ko00860	Porphyrin metabolism	Metabolism of cofactors and vitamins
T01-03_TRINITY_DN3434_c0_g2_i1	ko00860	Porphyrin metabolism	Metabolism of cofactors and vitamins
T01-03_TRINITY_DN3436_c0_g1_i36	ko00900	Terpenoid backbone biosynthesis	Metabolism of terpenoids and polyketides
T01-03_TRINITY_DN3438_c2_g1_i1	ko00860	Porphyrin metabolism	Metabolism of cofactors and vitamins
T01-03_TRINITY_DN34395_c0_g1_i1	ko00010	Glycolysis / Gluconeogenesis	Carbohydrate metabolism
T01-03_TRINITY_DN34395_c0_g1_i1	ko00040	Pentose and glucuronate interconversions	Carbohydrate metabolism
T01-03_TRINITY_DN34395_c0_g1_i1	ko00561	Glycerolipid metabolism	Lipid metabolism
T01-03_TRINITY_DN34395_c0_g1_i1	ko00930	Caprolactam degradation	Xenobiotics biodegradation and metabolism
T01-03_TRINITY_DN3445_c0_g1_i18	ko00940	Phenylpropanoid biosynthesis	Biosynthesis of other secondary metabolites
T01-03_TRINITY_DN3445_c0_g1_i18	ko00941	Flavonoid biosynthesis	Biosynthesis of other secondary metabolites
T01-03_TRINITY_DN3445_c0_g1_i18	ko00945	Stilbenoid, diarylheptanoid and gingerol biosynthesis	Biosynthesis of other secondary metabolites
T01-03_TRINITY_DN3451_c0_g1_i1	ko00330	Arginine and proline metabolism	Amino acid metabolism
T01-03_TRINITY_DN3451_c0_g1_i1	ko00360	Phenylalanine metabolism	Amino acid metabolism
T01-03_TRINITY_DN3451_c0_g1_i1	ko00380	Tryptophan metabolism	Amino acid metabolism
T01-03_TRINITY_DN3451_c0_g1_i1	ko00627	Aminobenzoate degradation	Xenobiotics biodegradation and metabolism
T01-03_TRINITY_DN3451_c0_g1_i1	ko00643	Styrene degradation	Xenobiotics biodegradation and metabolism
T01-03_TRINITY_DN346_c1_g1_i32	ko00010	Glycolysis / Gluconeogenesis	Carbohydrate metabolism
T01-03_TRINITY_DN346_c1_g1_i32	ko00030	Pentose phosphate pathway	Carbohydrate metabolism
T01-03_TRINITY_DN346_c1_g1_i32	ko00051	Fructose and mannose metabolism	Carbohydrate metabolism
T01-03_TRINITY_DN346_c1_g1_i32	ko00052	Galactose metabolism	Carbohydrate metabolism
T01-03_TRINITY_DN346_c1_g1_i32	ko00680	Methane metabolism	Energy metabolism
T01-03_TRINITY_DN34692_c0_g1_i2	ko00230	Purine metabolism	Nucleotide metabolism
T01-03_TRINITY_DN34692_c0_g2_i2	ko00230	Purine metabolism	Nucleotide metabolism
T01-03_TRINITY_DN347_c0_g1_i32	ko00790	Folate biosynthesis	Metabolism of cofactors and vitamins
T01-03_TRINITY_DN347_c1_g1_i8	ko00051	Fructose and mannose metabolism	Carbohydrate metabolism
T01-03_TRINITY_DN347_c1_g1_i8	ko00520	Amino sugar and nucleotide sugar metabolism	Carbohydrate metabolism
T01-03_TRINITY_DN34739_c0_g1_i1	ko00562	Inositol phosphate metabolism	Carbohydrate metabolism
T01-03_TRINITY_DN34793_c0_g1_i1	ko00220	Arginine biosynthesis	Amino acid metabolism
T01-03_TRINITY_DN34793_c0_g1_i1	ko00250	Alanine, aspartate and glutamate metabolism	Amino acid metabolism
T01-03_TRINITY_DN34793_c0_g1_i1	ko00910	Nitrogen metabolism	Energy metabolism
T01-03_TRINITY_DN348_c1_g1_i11	ko00620	Pyruvate metabolism	Carbohydrate metabolism
T01-03_TRINITY_DN348_c1_g1_i11	ko00640	Propanoate metabolism	Carbohydrate metabolism
T01-03_TRINITY_DN348_c1_g1_i11	ko00720	Carbon fixation pathways in prokaryotes	Energy metabolism
T01-03_TRINITY_DN348_c1_g1_i11	ko00061	Fatty acid biosynthesis	Lipid metabolism
T01-03_TRINITY_DN349_c0_g2_i1	ko00195	Photosynthesis	Energy metabolism
T01-03_TRINITY_DN3493_c0_g1_i29	ko00940	Phenylpropanoid biosynthesis	Biosynthesis of other secondary metabolites
T01-03_TRINITY_DN3493_c0_g1_i29	ko00500	Starch and sucrose metabolism	Carbohydrate metabolism
T01-03_TRINITY_DN3493_c0_g1_i29	ko00460	Cyanoamino acid metabolism	Metabolism of other amino acids
T01-03_TRINITY_DN3493_c0_g1_i29	ko00230	Purine metabolism	Nucleotide metabolism
T01-03_TRINITY_DN3494_c0_g1_i6	ko00561	Glycerolipid metabolism	Lipid metabolism
T01-03_TRINITY_DN34948_c0_g1_i1	ko00601	Glycosphingolipid biosynthesis - lacto and neolacto series	Glycan biosynthesis and metabolism
T01-03_TRINITY_DN34948_c0_g1_i1	ko00603	Glycosphingolipid biosynthesis - globo and isoglobo series	Glycan biosynthesis and metabolism
T01-03_TRINITY_DN3496_c0_g1_i1	ko00190	Oxidative phosphorylation	Energy metabolism
T01-03_TRINITY_DN350_c5_g1_i34	ko00563	Glycosylphosphatidylinositol (GPI)-anchor biosynthesis	Glycan biosynthesis and metabolism
T01-03_TRINITY_DN3503_c0_g3_i1	ko00130	Ubiquinone and other terpenoid-quinone biosynthesis	Metabolism of cofactors and vitamins
T01-03_TRINITY_DN35048_c0_g1_i3	ko00561	Glycerolipid metabolism	Lipid metabolism
T01-03_TRINITY_DN35048_c0_g1_i3	ko00564	Glycerophospholipid metabolism	Lipid metabolism
T01-03_TRINITY_DN35150_c0_g2_i1	ko00061	Fatty acid biosynthesis	Lipid metabolism
T01-03_TRINITY_DN35150_c0_g2_i1	ko01040	Biosynthesis of unsaturated fatty acids	Lipid metabolism
T01-03_TRINITY_DN3528_c0_g1_i2	ko00010	Glycolysis / Gluconeogenesis	Carbohydrate metabolism
T01-03_TRINITY_DN3528_c0_g1_i2	ko00030	Pentose phosphate pathway	Carbohydrate metabolism
T01-03_TRINITY_DN3528_c0_g1_i2	ko00051	Fructose and mannose metabolism	Carbohydrate metabolism
T01-03_TRINITY_DN3528_c0_g2_i15	ko00010	Glycolysis / Gluconeogenesis	Carbohydrate metabolism
T01-03_TRINITY_DN3528_c0_g2_i15	ko00030	Pentose phosphate pathway	Carbohydrate metabolism
T01-03_TRINITY_DN3528_c0_g2_i15	ko00051	Fructose and mannose metabolism	Carbohydrate metabolism
T01-03_TRINITY_DN35353_c1_g1_i1	ko00900	Terpenoid backbone biosynthesis	Metabolism of terpenoids and polyketides
T01-03_TRINITY_DN3542_c1_g1_i1	ko00562	Inositol phosphate metabolism	Carbohydrate metabolism
T01-03_TRINITY_DN3542_c1_g1_i1	ko00564	Glycerophospholipid metabolism	Lipid metabolism
T01-03_TRINITY_DN3542_c1_g1_i1	ko00565	Ether lipid metabolism	Lipid metabolism
T01-03_TRINITY_DN3569_c1_g1_i1	ko00904	Diterpenoid biosynthesis	Metabolism of terpenoids and polyketides
T01-03_TRINITY_DN3570_c3_g1_i1	ko00790	Folate biosynthesis	Metabolism of cofactors and vitamins
T01-03_TRINITY_DN3580_c1_g1_i1	ko00340	Histidine metabolism	Amino acid metabolism
T01-03_TRINITY_DN3583_c0_g1_i5	ko00920	Sulfur metabolism	Energy metabolism
T01-03_TRINITY_DN3583_c0_g1_i5	ko00230	Purine metabolism	Nucleotide metabolism
T01-03_TRINITY_DN3583_c0_g2_i1	ko00920	Sulfur metabolism	Energy metabolism
T01-03_TRINITY_DN3583_c0_g2_i1	ko00230	Purine metabolism	Nucleotide metabolism
T01-03_TRINITY_DN3587_c0_g1_i2	ko00250	Alanine, aspartate and glutamate metabolism	Amino acid metabolism
T01-03_TRINITY_DN3587_c0_g1_i2	ko00910	Nitrogen metabolism	Energy metabolism
T01-03_TRINITY_DN35884_c0_g1_i7	ko00260	Glycine, serine and threonine metabolism	Amino acid metabolism
T01-03_TRINITY_DN35884_c0_g1_i7	ko00400	Phenylalanine, tyrosine and tryptophan biosynthesis	Amino acid metabolism
T01-03_TRINITY_DN35884_c0_g1_i7	ko00402	Benzoxazinoid biosynthesis	Biosynthesis of other secondary metabolites
T01-03_TRINITY_DN35951_c0_g1_i2	ko00940	Phenylpropanoid biosynthesis	Biosynthesis of other secondary metabolites
T01-03_TRINITY_DN3596_c0_g2_i1	ko00260	Glycine, serine and threonine metabolism	Amino acid metabolism
T01-03_TRINITY_DN3596_c0_g2_i1	ko00310	Lysine degradation	Amino acid metabolism
T01-03_TRINITY_DN36038_c0_g2_i3	ko00040	Pentose and glucuronate interconversions	Carbohydrate metabolism
T01-03_TRINITY_DN36038_c0_g2_i3	ko00052	Galactose metabolism	Carbohydrate metabolism
T01-03_TRINITY_DN36038_c0_g2_i3	ko00500	Starch and sucrose metabolism	Carbohydrate metabolism
T01-03_TRINITY_DN36038_c0_g2_i3	ko00520	Amino sugar and nucleotide sugar metabolism	Carbohydrate metabolism
T01-03_TRINITY_DN36127_c0_g1_i2	ko00040	Pentose and glucuronate interconversions	Carbohydrate metabolism
T01-03_TRINITY_DN3615_c0_g1_i2	ko00900	Terpenoid backbone biosynthesis	Metabolism of terpenoids and polyketides
T01-03_TRINITY_DN3615_c0_g1_i2	ko00909	Sesquiterpenoid and triterpenoid biosynthesis	Metabolism of terpenoids and polyketides
T01-03_TRINITY_DN3616_c0_g1_i2	ko00360	Phenylalanine metabolism	Amino acid metabolism
T01-03_TRINITY_DN3616_c0_g1_i2	ko00940	Phenylpropanoid biosynthesis	Biosynthesis of other secondary metabolites
T01-03_TRINITY_DN362_c0_g1_i9	ko00520	Amino sugar and nucleotide sugar metabolism	Carbohydrate metabolism
T01-03_TRINITY_DN362_c1_g1_i4	ko00220	Arginine biosynthesis	Amino acid metabolism
T01-03_TRINITY_DN3636_c0_g2_i1	ko01040	Biosynthesis of unsaturated fatty acids	Lipid metabolism
T01-03_TRINITY_DN36436_c0_g1_i1	ko00240	Pyrimidine metabolism	Nucleotide metabolism
T01-03_TRINITY_DN36463_c0_g1_i1	ko00564	Glycerophospholipid metabolism	Lipid metabolism
T01-03_TRINITY_DN36505_c0_g1_i1	ko00010	Glycolysis / Gluconeogenesis	Carbohydrate metabolism
T01-03_TRINITY_DN36505_c0_g1_i1	ko00710	Carbon fixation in photosynthetic organisms	Energy metabolism
T01-03_TRINITY_DN3658_c0_g1_i8	ko00510	N-Glycan biosynthesis	Glycan biosynthesis and metabolism
T01-03_TRINITY_DN3658_c2_g1_i1	ko00510	N-Glycan biosynthesis	Glycan biosynthesis and metabolism
T01-03_TRINITY_DN3660_c0_g1_i2	ko00230	Purine metabolism	Nucleotide metabolism
T01-03_TRINITY_DN36601_c0_g1_i2	ko00909	Sesquiterpenoid and triterpenoid biosynthesis	Metabolism of terpenoids and polyketides
T01-03_TRINITY_DN3662_c2_g1_i1	ko00195	Photosynthesis	Energy metabolism
T01-03_TRINITY_DN3665_c0_g2_i2	ko00010	Glycolysis / Gluconeogenesis	Carbohydrate metabolism
T01-03_TRINITY_DN3665_c0_g2_i2	ko00030	Pentose phosphate pathway	Carbohydrate metabolism
T01-03_TRINITY_DN3665_c0_g2_i2	ko00051	Fructose and mannose metabolism	Carbohydrate metabolism
T01-03_TRINITY_DN3665_c0_g2_i2	ko00052	Galactose metabolism	Carbohydrate metabolism
T01-03_TRINITY_DN3665_c0_g2_i2	ko00680	Methane metabolism	Energy metabolism
T01-03_TRINITY_DN3666_c0_g2_i1	ko00230	Purine metabolism	Nucleotide metabolism
T01-03_TRINITY_DN36693_c0_g2_i1	ko00790	Folate biosynthesis	Metabolism of cofactors and vitamins
T01-03_TRINITY_DN36834_c0_g1_i3	ko00270	Cysteine and methionine metabolism	Amino acid metabolism
T01-03_TRINITY_DN3696_c0_g1_i1	ko00564	Glycerophospholipid metabolism	Lipid metabolism
T01-03_TRINITY_DN3696_c0_g1_i1	ko00565	Ether lipid metabolism	Lipid metabolism
T01-03_TRINITY_DN3696_c0_g1_i1	ko00590	Arachidonic acid metabolism	Lipid metabolism
T01-03_TRINITY_DN3696_c0_g1_i1	ko00591	Linoleic acid metabolism	Lipid metabolism
T01-03_TRINITY_DN3696_c0_g1_i1	ko00592	alpha-Linolenic acid metabolism	Lipid metabolism
T01-03_TRINITY_DN3696_c0_g2_i2	ko00564	Glycerophospholipid metabolism	Lipid metabolism
T01-03_TRINITY_DN3696_c0_g2_i2	ko00565	Ether lipid metabolism	Lipid metabolism
T01-03_TRINITY_DN3696_c0_g2_i2	ko00590	Arachidonic acid metabolism	Lipid metabolism
T01-03_TRINITY_DN3696_c0_g2_i2	ko00591	Linoleic acid metabolism	Lipid metabolism
T01-03_TRINITY_DN3696_c0_g2_i2	ko00592	alpha-Linolenic acid metabolism	Lipid metabolism
T01-03_TRINITY_DN3697_c1_g2_i1	ko00073	Cutin, suberine and wax biosynthesis	Lipid metabolism
T01-03_TRINITY_DN36983_c0_g1_i1	ko00270	Cysteine and methionine metabolism	Amino acid metabolism
T01-03_TRINITY_DN3701_c0_g1_i2	ko00510	N-Glycan biosynthesis	Glycan biosynthesis and metabolism
T01-03_TRINITY_DN3701_c0_g1_i2	ko00513	Various types of N-glycan biosynthesis	Glycan biosynthesis and metabolism
T01-03_TRINITY_DN3709_c0_g1_i9	ko00270	Cysteine and methionine metabolism	Amino acid metabolism
T01-03_TRINITY_DN3709_c0_g1_i9	ko00020	Citrate cycle (TCA cycle)	Carbohydrate metabolism
T01-03_TRINITY_DN3709_c0_g1_i9	ko00620	Pyruvate metabolism	Carbohydrate metabolism
T01-03_TRINITY_DN3709_c0_g1_i9	ko00630	Glyoxylate and dicarboxylate metabolism	Carbohydrate metabolism
T01-03_TRINITY_DN3709_c0_g1_i9	ko00710	Carbon fixation in photosynthetic organisms	Energy metabolism
T01-03_TRINITY_DN37181_c1_g1_i1	ko00480	Glutathione metabolism	Metabolism of other amino acids
T01-03_TRINITY_DN37181_c1_g1_i1	ko00980	Metabolism of xenobiotics by cytochrome P450	Xenobiotics biodegradation and metabolism
T01-03_TRINITY_DN37181_c1_g1_i1	ko00982	Drug metabolism - cytochrome P450	Xenobiotics biodegradation and metabolism
T01-03_TRINITY_DN37181_c1_g1_i1	ko00983	Drug metabolism - other enzymes	Xenobiotics biodegradation and metabolism
T01-03_TRINITY_DN3725_c0_g1_i2	ko00240	Pyrimidine metabolism	Nucleotide metabolism
T01-03_TRINITY_DN374_c1_g1_i8	ko00900	Terpenoid backbone biosynthesis	Metabolism of terpenoids and polyketides
T01-03_TRINITY_DN37467_c1_g1_i4	ko00190	Oxidative phosphorylation	Energy metabolism
T01-03_TRINITY_DN37467_c1_g1_i4	ko00195	Photosynthesis	Energy metabolism
T01-03_TRINITY_DN375_c1_g1_i12	ko00190	Oxidative phosphorylation	Energy metabolism
T01-03_TRINITY_DN375_c3_g1_i15	ko00592	alpha-Linolenic acid metabolism	Lipid metabolism
T01-03_TRINITY_DN3755_c0_g1_i4	ko00500	Starch and sucrose metabolism	Carbohydrate metabolism
T01-03_TRINITY_DN37592_c0_g1_i1	ko00053	Ascorbate and aldarate metabolism	Carbohydrate metabolism
T01-03_TRINITY_DN3763_c2_g1_i3	ko00730	Thiamine metabolism	Metabolism of cofactors and vitamins
T01-03_TRINITY_DN3767_c0_g1_i2	ko00230	Purine metabolism	Nucleotide metabolism
T01-03_TRINITY_DN37757_c0_g1_i1	ko00195	Photosynthesis	Energy metabolism
T01-03_TRINITY_DN3778_c10_g1_i2	ko00770	Pantothenate and CoA biosynthesis	Metabolism of cofactors and vitamins
T01-03_TRINITY_DN3789_c0_g1_i2	ko00564	Glycerophospholipid metabolism	Lipid metabolism
T01-03_TRINITY_DN3789_c0_g1_i2	ko00565	Ether lipid metabolism	Lipid metabolism
T01-03_TRINITY_DN3790_c0_g2_i1	ko00591	Linoleic acid metabolism	Lipid metabolism
T01-03_TRINITY_DN3790_c0_g2_i1	ko00592	alpha-Linolenic acid metabolism	Lipid metabolism
T01-03_TRINITY_DN3799_c0_g1_i9	ko00600	Sphingolipid metabolism	Lipid metabolism
T01-03_TRINITY_DN38_c2_g1_i3	ko00100	Steroid biosynthesis	Lipid metabolism
T01-03_TRINITY_DN3814_c0_g1_i2	ko00280	Valine, leucine and isoleucine degradation	Amino acid metabolism
T01-03_TRINITY_DN3814_c0_g1_i2	ko00650	Butanoate metabolism	Carbohydrate metabolism
T01-03_TRINITY_DN3814_c0_g1_i2	ko00281	Geraniol degradation	Metabolism of terpenoids and polyketides
T01-03_TRINITY_DN3822_c0_g1_i2	ko00061	Fatty acid biosynthesis	Lipid metabolism
T01-03_TRINITY_DN3822_c0_g1_i2	ko00071	Fatty acid degradation	Lipid metabolism
T01-03_TRINITY_DN3827_c0_g1_i1	ko00230	Purine metabolism	Nucleotide metabolism
T01-03_TRINITY_DN3827_c0_g3_i1	ko00230	Purine metabolism	Nucleotide metabolism
T01-03_TRINITY_DN3827_c0_g4_i1	ko00230	Purine metabolism	Nucleotide metabolism
T01-03_TRINITY_DN3838_c0_g2_i1	ko00195	Photosynthesis	Energy metabolism
T01-03_TRINITY_DN3852_c2_g1_i1	ko00906	Carotenoid biosynthesis	Metabolism of terpenoids and polyketides
T01-03_TRINITY_DN3866_c0_g1_i31	ko00380	Tryptophan metabolism	Amino acid metabolism
T01-03_TRINITY_DN3866_c2_g1_i2	ko00531	Glycosaminoglycan degradation	Glycan biosynthesis and metabolism
T01-03_TRINITY_DN3868_c0_g1_i2	ko00562	Inositol phosphate metabolism	Carbohydrate metabolism
T01-03_TRINITY_DN38748_c0_g1_i1	ko00900	Terpenoid backbone biosynthesis	Metabolism of terpenoids and polyketides
T01-03_TRINITY_DN3888_c0_g1_i11	ko00940	Phenylpropanoid biosynthesis	Biosynthesis of other secondary metabolites
T01-03_TRINITY_DN3890_c0_g1_i1	ko00760	Nicotinate and nicotinamide metabolism	Metabolism of cofactors and vitamins
T01-03_TRINITY_DN3894_c0_g1_i2	ko00941	Flavonoid biosynthesis	Biosynthesis of other secondary metabolites
T01-03_TRINITY_DN38950_c0_g1_i1	ko00520	Amino sugar and nucleotide sugar metabolism	Carbohydrate metabolism
T01-03_TRINITY_DN3904_c0_g1_i2	ko00760	Nicotinate and nicotinamide metabolism	Metabolism of cofactors and vitamins
T01-03_TRINITY_DN3904_c0_g1_i2	ko00240	Pyrimidine metabolism	Nucleotide metabolism
T01-03_TRINITY_DN3904_c1_g1_i8	ko00561	Glycerolipid metabolism	Lipid metabolism
T01-03_TRINITY_DN3904_c1_g1_i8	ko00564	Glycerophospholipid metabolism	Lipid metabolism
T01-03_TRINITY_DN3907_c0_g1_i10	ko00562	Inositol phosphate metabolism	Carbohydrate metabolism
T01-03_TRINITY_DN3907_c0_g2_i2	ko00562	Inositol phosphate metabolism	Carbohydrate metabolism
T01-03_TRINITY_DN39091_c0_g1_i1	ko00053	Ascorbate and aldarate metabolism	Carbohydrate metabolism
T01-03_TRINITY_DN3914_c0_g1_i1	ko00062	Fatty acid elongation	Lipid metabolism
T01-03_TRINITY_DN3914_c0_g3_i2	ko00062	Fatty acid elongation	Lipid metabolism
T01-03_TRINITY_DN3915_c0_g1_i11	ko00270	Cysteine and methionine metabolism	Amino acid metabolism
T01-03_TRINITY_DN39163_c0_g1_i8	ko00040	Pentose and glucuronate interconversions	Carbohydrate metabolism
T01-03_TRINITY_DN392_c0_g3_i1	ko00270	Cysteine and methionine metabolism	Amino acid metabolism
T01-03_TRINITY_DN392_c0_g3_i1	ko00330	Arginine and proline metabolism	Amino acid metabolism
T01-03_TRINITY_DN3925_c0_g1_i1	ko00330	Arginine and proline metabolism	Amino acid metabolism
T01-03_TRINITY_DN3925_c1_g1_i1	ko00564	Glycerophospholipid metabolism	Lipid metabolism
T01-03_TRINITY_DN3925_c1_g2_i2	ko00564	Glycerophospholipid metabolism	Lipid metabolism
T01-03_TRINITY_DN3925_c1_g3_i1	ko00010	Glycolysis / Gluconeogenesis	Carbohydrate metabolism
T01-03_TRINITY_DN3925_c1_g3_i1	ko00040	Pentose and glucuronate interconversions	Carbohydrate metabolism
T01-03_TRINITY_DN3925_c1_g3_i1	ko00051	Fructose and mannose metabolism	Carbohydrate metabolism
T01-03_TRINITY_DN3925_c1_g3_i1	ko00052	Galactose metabolism	Carbohydrate metabolism
T01-03_TRINITY_DN3925_c1_g3_i1	ko00561	Glycerolipid metabolism	Lipid metabolism
T01-03_TRINITY_DN3925_c1_g3_i1	ko00790	Folate biosynthesis	Metabolism of cofactors and vitamins
T01-03_TRINITY_DN3925_c1_g3_i1	ko00930	Caprolactam degradation	Xenobiotics biodegradation and metabolism
T01-03_TRINITY_DN3927_c1_g3_i1	ko00561	Glycerolipid metabolism	Lipid metabolism
T01-03_TRINITY_DN3927_c1_g3_i1	ko00564	Glycerophospholipid metabolism	Lipid metabolism
T01-03_TRINITY_DN3934_c0_g1_i4	ko00250	Alanine, aspartate and glutamate metabolism	Amino acid metabolism
T01-03_TRINITY_DN3934_c0_g1_i4	ko00240	Pyrimidine metabolism	Nucleotide metabolism
T01-03_TRINITY_DN3939_c0_g1_i2	ko00900	Terpenoid backbone biosynthesis	Metabolism of terpenoids and polyketides
T01-03_TRINITY_DN3949_c0_g1_i4	ko00230	Purine metabolism	Nucleotide metabolism
T01-03_TRINITY_DN395_c2_g1_i2	ko00500	Starch and sucrose metabolism	Carbohydrate metabolism
T01-03_TRINITY_DN39504_c0_g4_i1	ko00010	Glycolysis / Gluconeogenesis	Carbohydrate metabolism
T01-03_TRINITY_DN39504_c0_g4_i1	ko00020	Citrate cycle (TCA cycle)	Carbohydrate metabolism
T01-03_TRINITY_DN39504_c0_g4_i1	ko00620	Pyruvate metabolism	Carbohydrate metabolism
T01-03_TRINITY_DN3952_c0_g1_i1	ko00190	Oxidative phosphorylation	Energy metabolism
T01-03_TRINITY_DN3956_c2_g1_i1	ko00190	Oxidative phosphorylation	Energy metabolism
T01-03_TRINITY_DN3959_c0_g1_i13	ko00730	Thiamine metabolism	Metabolism of cofactors and vitamins
T01-03_TRINITY_DN39593_c0_g1_i14	ko00564	Glycerophospholipid metabolism	Lipid metabolism
T01-03_TRINITY_DN3981_c1_g2_i1	ko00450	Selenocompound metabolism	Metabolism of other amino acids
T01-03_TRINITY_DN39849_c0_g1_i1	ko00520	Amino sugar and nucleotide sugar metabolism	Carbohydrate metabolism
T01-03_TRINITY_DN3994_c0_g1_i1	ko00195	Photosynthesis	Energy metabolism
T01-03_TRINITY_DN4002_c0_g1_i1	ko00040	Pentose and glucuronate interconversions	Carbohydrate metabolism
T01-03_TRINITY_DN40041_c0_g1_i9	ko00480	Glutathione metabolism	Metabolism of other amino acids
T01-03_TRINITY_DN40041_c0_g1_i9	ko00980	Metabolism of xenobiotics by cytochrome P450	Xenobiotics biodegradation and metabolism
T01-03_TRINITY_DN40041_c0_g1_i9	ko00982	Drug metabolism - cytochrome P450	Xenobiotics biodegradation and metabolism
T01-03_TRINITY_DN40041_c0_g1_i9	ko00983	Drug metabolism - other enzymes	Xenobiotics biodegradation and metabolism
T01-03_TRINITY_DN4008_c0_g1_i10	ko00450	Selenocompound metabolism	Metabolism of other amino acids
T01-03_TRINITY_DN4008_c0_g3_i6	ko00450	Selenocompound metabolism	Metabolism of other amino acids
T01-03_TRINITY_DN402_c0_g1_i2	ko00190	Oxidative phosphorylation	Energy metabolism
T01-03_TRINITY_DN40228_c0_g1_i1	ko00195	Photosynthesis	Energy metabolism
T01-03_TRINITY_DN4040_c0_g1_i1	ko00190	Oxidative phosphorylation	Energy metabolism
T01-03_TRINITY_DN4052_c0_g1_i5	ko00270	Cysteine and methionine metabolism	Amino acid metabolism
T01-03_TRINITY_DN4052_c0_g1_i5	ko00350	Tyrosine metabolism	Amino acid metabolism
T01-03_TRINITY_DN4052_c0_g1_i5	ko00360	Phenylalanine metabolism	Amino acid metabolism
T01-03_TRINITY_DN4052_c0_g1_i5	ko00380	Tryptophan metabolism	Amino acid metabolism
T01-03_TRINITY_DN4052_c0_g1_i5	ko00400	Phenylalanine, tyrosine and tryptophan biosynthesis	Amino acid metabolism
T01-03_TRINITY_DN4052_c0_g1_i5	ko00401	Novobiocin biosynthesis	Biosynthesis of other secondary metabolites
T01-03_TRINITY_DN4052_c0_g1_i5	ko00950	Isoquinoline alkaloid biosynthesis	Biosynthesis of other secondary metabolites
T01-03_TRINITY_DN4052_c0_g1_i5	ko00960	Tropane, piperidine and pyridine alkaloid biosynthesis	Biosynthesis of other secondary metabolites
T01-03_TRINITY_DN4052_c0_g1_i5	ko00966	Glucosinolate biosynthesis	Biosynthesis of other secondary metabolites
T01-03_TRINITY_DN4052_c0_g1_i5	ko00130	Ubiquinone and other terpenoid-quinone biosynthesis	Metabolism of cofactors and vitamins
T01-03_TRINITY_DN4058_c0_g1_i3	ko00330	Arginine and proline metabolism	Amino acid metabolism
T01-03_TRINITY_DN40598_c0_g1_i1	ko00190	Oxidative phosphorylation	Energy metabolism
T01-03_TRINITY_DN40598_c0_g1_i1	ko00195	Photosynthesis	Energy metabolism
T01-03_TRINITY_DN40598_c0_g1_i1	ko00230	Purine metabolism	Nucleotide metabolism
T01-03_TRINITY_DN40598_c0_g1_i1	ko00240	Pyrimidine metabolism	Nucleotide metabolism
T01-03_TRINITY_DN4064_c0_g1_i1	ko00750	Vitamin B6 metabolism	Metabolism of cofactors and vitamins
T01-03_TRINITY_DN4068_c0_g1_i1	ko00860	Porphyrin metabolism	Metabolism of cofactors and vitamins
T01-03_TRINITY_DN40748_c0_g1_i1	ko00500	Starch and sucrose metabolism	Carbohydrate metabolism
T01-03_TRINITY_DN40760_c0_g1_i1	ko00905	Brassinosteroid biosynthesis	Metabolism of terpenoids and polyketides
T01-03_TRINITY_DN408_c1_g2_i1	ko01040	Biosynthesis of unsaturated fatty acids	Lipid metabolism
T01-03_TRINITY_DN4082_c0_g1_i3	ko00630	Glyoxylate and dicarboxylate metabolism	Carbohydrate metabolism
T01-03_TRINITY_DN4082_c0_g1_i3	ko00710	Carbon fixation in photosynthetic organisms	Energy metabolism
T01-03_TRINITY_DN4083_c0_g2_i1	ko00040	Pentose and glucuronate interconversions	Carbohydrate metabolism
T01-03_TRINITY_DN4083_c0_g2_i1	ko00053	Ascorbate and aldarate metabolism	Carbohydrate metabolism
T01-03_TRINITY_DN4083_c0_g2_i1	ko00520	Amino sugar and nucleotide sugar metabolism	Carbohydrate metabolism
T01-03_TRINITY_DN4090_c0_g1_i8	ko00910	Nitrogen metabolism	Energy metabolism
T01-03_TRINITY_DN4106_c1_g3_i2	ko00730	Thiamine metabolism	Metabolism of cofactors and vitamins
T01-03_TRINITY_DN4121_c1_g1_i1	ko00230	Purine metabolism	Nucleotide metabolism
T01-03_TRINITY_DN4121_c1_g1_i1	ko00240	Pyrimidine metabolism	Nucleotide metabolism
T01-03_TRINITY_DN4130_c2_g1_i4	ko00590	Arachidonic acid metabolism	Lipid metabolism
T01-03_TRINITY_DN4141_c0_g1_i1	ko00220	Arginine biosynthesis	Amino acid metabolism
T01-03_TRINITY_DN4141_c0_g1_i1	ko00330	Arginine and proline metabolism	Amino acid metabolism
T01-03_TRINITY_DN4141_c0_g2_i2	ko00220	Arginine biosynthesis	Amino acid metabolism
T01-03_TRINITY_DN4141_c0_g2_i2	ko00330	Arginine and proline metabolism	Amino acid metabolism
T01-03_TRINITY_DN4147_c0_g1_i10	ko00561	Glycerolipid metabolism	Lipid metabolism
T01-03_TRINITY_DN4147_c0_g1_i10	ko00564	Glycerophospholipid metabolism	Lipid metabolism
T01-03_TRINITY_DN41488_c0_g1_i1	ko00196	Photosynthesis - antenna proteins	Energy metabolism
T01-03_TRINITY_DN41610_c0_g1_i2	ko00020	Citrate cycle (TCA cycle)	Carbohydrate metabolism
T01-03_TRINITY_DN41610_c0_g1_i2	ko00720	Carbon fixation pathways in prokaryotes	Energy metabolism
T01-03_TRINITY_DN4166_c0_g1_i1	ko00190	Oxidative phosphorylation	Energy metabolism
T01-03_TRINITY_DN4175_c0_g2_i6	ko00061	Fatty acid biosynthesis	Lipid metabolism
T01-03_TRINITY_DN4175_c0_g2_i6	ko00071	Fatty acid degradation	Lipid metabolism
T01-03_TRINITY_DN41759_c0_g1_i1	ko00190	Oxidative phosphorylation	Energy metabolism
T01-03_TRINITY_DN4177_c0_g2_i1	ko00531	Glycosaminoglycan degradation	Glycan biosynthesis and metabolism
T01-03_TRINITY_DN4181_c1_g1_i1	ko00520	Amino sugar and nucleotide sugar metabolism	Carbohydrate metabolism
T01-03_TRINITY_DN4181_c1_g1_i1	ko00523	Polyketide sugar unit biosynthesis	Metabolism of terpenoids and polyketides
T01-03_TRINITY_DN419_c1_g2_i1	ko00230	Purine metabolism	Nucleotide metabolism
T01-03_TRINITY_DN419_c1_g2_i1	ko00240	Pyrimidine metabolism	Nucleotide metabolism
T01-03_TRINITY_DN419_c1_g2_i1	ko00983	Drug metabolism - other enzymes	Xenobiotics biodegradation and metabolism
T01-03_TRINITY_DN41961_c1_g1_i1	ko00280	Valine, leucine and isoleucine degradation	Amino acid metabolism
T01-03_TRINITY_DN41961_c1_g1_i1	ko00640	Propanoate metabolism	Carbohydrate metabolism
T01-03_TRINITY_DN41961_c1_g1_i1	ko00410	beta-Alanine metabolism	Metabolism of other amino acids
T01-03_TRINITY_DN4206_c0_g1_i3	ko00563	Glycosylphosphatidylinositol (GPI)-anchor biosynthesis	Glycan biosynthesis and metabolism
T01-03_TRINITY_DN4206_c0_g2_i2	ko00563	Glycosylphosphatidylinositol (GPI)-anchor biosynthesis	Glycan biosynthesis and metabolism
T01-03_TRINITY_DN42116_c0_g1_i13	ko00620	Pyruvate metabolism	Carbohydrate metabolism
T01-03_TRINITY_DN42116_c0_g1_i13	ko00630	Glyoxylate and dicarboxylate metabolism	Carbohydrate metabolism
T01-03_TRINITY_DN42116_c0_g1_i13	ko00640	Propanoate metabolism	Carbohydrate metabolism
T01-03_TRINITY_DN42116_c0_g1_i13	ko00710	Carbon fixation in photosynthetic organisms	Energy metabolism
T01-03_TRINITY_DN42116_c0_g1_i13	ko00720	Carbon fixation pathways in prokaryotes	Energy metabolism
T01-03_TRINITY_DN42116_c0_g1_i13	ko00061	Fatty acid biosynthesis	Lipid metabolism
T01-03_TRINITY_DN42167_c0_g1_i1	ko00030	Pentose phosphate pathway	Carbohydrate metabolism
T01-03_TRINITY_DN42167_c0_g1_i1	ko00710	Carbon fixation in photosynthetic organisms	Energy metabolism
T01-03_TRINITY_DN42167_c0_g1_i1	ko01051	Biosynthesis of ansamycins	Metabolism of terpenoids and polyketides
T01-03_TRINITY_DN4232_c0_g1_i6	ko00100	Steroid biosynthesis	Lipid metabolism
T01-03_TRINITY_DN4237_c3_g1_i1	ko00195	Photosynthesis	Energy metabolism
T01-03_TRINITY_DN424_c0_g1_i2	ko00400	Phenylalanine, tyrosine and tryptophan biosynthesis	Amino acid metabolism
T01-03_TRINITY_DN424_c1_g2_i1	ko00400	Phenylalanine, tyrosine and tryptophan biosynthesis	Amino acid metabolism
T01-03_TRINITY_DN4242_c0_g1_i12	ko00190	Oxidative phosphorylation	Energy metabolism
T01-03_TRINITY_DN4242_c1_g1_i2	ko00220	Arginine biosynthesis	Amino acid metabolism
T01-03_TRINITY_DN4242_c1_g1_i2	ko00250	Alanine, aspartate and glutamate metabolism	Amino acid metabolism
T01-03_TRINITY_DN4242_c1_g1_i2	ko00270	Cysteine and methionine metabolism	Amino acid metabolism
T01-03_TRINITY_DN4242_c1_g1_i2	ko00330	Arginine and proline metabolism	Amino acid metabolism
T01-03_TRINITY_DN4242_c1_g1_i2	ko00350	Tyrosine metabolism	Amino acid metabolism
T01-03_TRINITY_DN4242_c1_g1_i2	ko00360	Phenylalanine metabolism	Amino acid metabolism
T01-03_TRINITY_DN4242_c1_g1_i2	ko00400	Phenylalanine, tyrosine and tryptophan biosynthesis	Amino acid metabolism
T01-03_TRINITY_DN4242_c1_g1_i2	ko00950	Isoquinoline alkaloid biosynthesis	Biosynthesis of other secondary metabolites
T01-03_TRINITY_DN4242_c1_g1_i2	ko00960	Tropane, piperidine and pyridine alkaloid biosynthesis	Biosynthesis of other secondary metabolites
T01-03_TRINITY_DN4242_c1_g1_i2	ko00710	Carbon fixation in photosynthetic organisms	Energy metabolism
T01-03_TRINITY_DN42483_c0_g1_i1	ko00900	Terpenoid backbone biosynthesis	Metabolism of terpenoids and polyketides
T01-03_TRINITY_DN42556_c0_g1_i1	ko00270	Cysteine and methionine metabolism	Amino acid metabolism
T01-03_TRINITY_DN42588_c0_g1_i1	ko00195	Photosynthesis	Energy metabolism
T01-03_TRINITY_DN427_c0_g1_i13	ko00071	Fatty acid degradation	Lipid metabolism
T01-03_TRINITY_DN427_c0_g1_i13	ko00592	alpha-Linolenic acid metabolism	Lipid metabolism
T01-03_TRINITY_DN427_c0_g1_i13	ko01040	Biosynthesis of unsaturated fatty acids	Lipid metabolism
T01-03_TRINITY_DN428_c2_g1_i4	ko00061	Fatty acid biosynthesis	Lipid metabolism
T01-03_TRINITY_DN4282_c0_g1_i6	ko00563	Glycosylphosphatidylinositol (GPI)-anchor biosynthesis	Glycan biosynthesis and metabolism
T01-03_TRINITY_DN4287_c0_g1_i2	ko00100	Steroid biosynthesis	Lipid metabolism
T01-03_TRINITY_DN42875_c0_g1_i5	ko00910	Nitrogen metabolism	Energy metabolism
T01-03_TRINITY_DN4292_c3_g1_i1	ko00260	Glycine, serine and threonine metabolism	Amino acid metabolism
T01-03_TRINITY_DN4292_c3_g1_i1	ko00290	Valine, leucine and isoleucine biosynthesis	Amino acid metabolism
T01-03_TRINITY_DN4297_c0_g1_i1	ko00900	Terpenoid backbone biosynthesis	Metabolism of terpenoids and polyketides
T01-03_TRINITY_DN43_c1_g1_i1	ko00010	Glycolysis / Gluconeogenesis	Carbohydrate metabolism
T01-03_TRINITY_DN4311_c0_g1_i7	ko00520	Amino sugar and nucleotide sugar metabolism	Carbohydrate metabolism
T01-03_TRINITY_DN4311_c0_g2_i4	ko00520	Amino sugar and nucleotide sugar metabolism	Carbohydrate metabolism
T01-03_TRINITY_DN4312_c0_g3_i1	ko00190	Oxidative phosphorylation	Energy metabolism
T01-03_TRINITY_DN43158_c0_g1_i1	ko00511	Other glycan degradation	Glycan biosynthesis and metabolism
T01-03_TRINITY_DN43158_c0_g1_i1	ko00600	Sphingolipid metabolism	Lipid metabolism
T01-03_TRINITY_DN4319_c0_g1_i1	ko00260	Glycine, serine and threonine metabolism	Amino acid metabolism
T01-03_TRINITY_DN4319_c0_g1_i1	ko00630	Glyoxylate and dicarboxylate metabolism	Carbohydrate metabolism
T01-03_TRINITY_DN4319_c0_g1_i1	ko00561	Glycerolipid metabolism	Lipid metabolism
T01-03_TRINITY_DN4330_c0_g1_i18	ko00130	Ubiquinone and other terpenoid-quinone biosynthesis	Metabolism of cofactors and vitamins
T01-03_TRINITY_DN43313_c0_g1_i1	ko00562	Inositol phosphate metabolism	Carbohydrate metabolism
T01-03_TRINITY_DN43428_c0_g1_i1	ko00620	Pyruvate metabolism	Carbohydrate metabolism
T01-03_TRINITY_DN43428_c0_g1_i1	ko00130	Ubiquinone and other terpenoid-quinone biosynthesis	Metabolism of cofactors and vitamins
T01-03_TRINITY_DN435_c1_g1_i2	ko00860	Porphyrin metabolism	Metabolism of cofactors and vitamins
T01-03_TRINITY_DN436_c0_g1_i4	ko00270	Cysteine and methionine metabolism	Amino acid metabolism
T01-03_TRINITY_DN4367_c0_g1_i1	ko00190	Oxidative phosphorylation	Energy metabolism
T01-03_TRINITY_DN437_c4_g2_i5	ko00220	Arginine biosynthesis	Amino acid metabolism
T01-03_TRINITY_DN437_c4_g2_i5	ko00250	Alanine, aspartate and glutamate metabolism	Amino acid metabolism
T01-03_TRINITY_DN437_c4_g2_i5	ko00630	Glyoxylate and dicarboxylate metabolism	Carbohydrate metabolism
T01-03_TRINITY_DN437_c4_g2_i5	ko00910	Nitrogen metabolism	Energy metabolism
T01-03_TRINITY_DN437_c5_g1_i2	ko00260	Glycine, serine and threonine metabolism	Amino acid metabolism
T01-03_TRINITY_DN437_c5_g1_i2	ko00750	Vitamin B6 metabolism	Metabolism of cofactors and vitamins
T01-03_TRINITY_DN438_c0_g2_i3	ko00061	Fatty acid biosynthesis	Lipid metabolism
T01-03_TRINITY_DN438_c0_g2_i3	ko01040	Biosynthesis of unsaturated fatty acids	Lipid metabolism
T01-03_TRINITY_DN43839_c0_g1_i2	ko00020	Citrate cycle (TCA cycle)	Carbohydrate metabolism
T01-03_TRINITY_DN43839_c0_g1_i2	ko00720	Carbon fixation pathways in prokaryotes	Energy metabolism
T01-03_TRINITY_DN4389_c0_g1_i4	ko00860	Porphyrin metabolism	Metabolism of cofactors and vitamins
T01-03_TRINITY_DN439_c1_g1_i10	ko00010	Glycolysis / Gluconeogenesis	Carbohydrate metabolism
T01-03_TRINITY_DN4391_c0_g1_i1	ko00564	Glycerophospholipid metabolism	Lipid metabolism
T01-03_TRINITY_DN440_c0_g1_i16	ko00380	Tryptophan metabolism	Amino acid metabolism
T01-03_TRINITY_DN440_c0_g1_i16	ko00910	Nitrogen metabolism	Energy metabolism
T01-03_TRINITY_DN440_c0_g1_i16	ko00460	Cyanoamino acid metabolism	Metabolism of other amino acids
T01-03_TRINITY_DN440_c0_g1_i16	ko00627	Aminobenzoate degradation	Xenobiotics biodegradation and metabolism
T01-03_TRINITY_DN440_c0_g1_i16	ko00643	Styrene degradation	Xenobiotics biodegradation and metabolism
T01-03_TRINITY_DN440_c2_g3_i1	ko00620	Pyruvate metabolism	Carbohydrate metabolism
T01-03_TRINITY_DN440_c2_g3_i1	ko00680	Methane metabolism	Energy metabolism
T01-03_TRINITY_DN440_c2_g3_i1	ko00710	Carbon fixation in photosynthetic organisms	Energy metabolism
[truncated: 39,758 more rows]

## Sheet: Table S5
Table S5.Information about EST-SSR primers in the fruit tissue of A. trifoliata
Unigene	SSR nr	SSR	size	Forward primer (5'-3')	Tm	size	Reverse primer (5'-3')	Tm	size	Product size (bp)	Gene function annotation	Annotation classification
T01-03_TRINITY_DN1004_c2_g1_i7	1	(T)17	17	TGCTTCCTTCTTGTCCACGA	59.244	20	TCTCTTGCTGGACGGAGAGA	59.962	20	239	Purine metabolism; Pyrimidine metabolism	Nucleotide metabolism
T01-03_TRINITY_DN10047_c0_g1_i3	1	(CT)6	12	GCCTCGTTGCCATCTCAATC	59.34	20	AGCTCGGATTTGAGGGAACG	60.108	20	125	Pentose phosphate pathway	Carbohydrate metabolism
T01-03_TRINITY_DN10064_c1_g1_i1	1	(AG)13	26	TCCACCATCAAAAGACCTCGA	59.025	21	AGGCTTTAGCGAGTTTGGAGA	59.376	21	279	Oxidative phosphorylation; Photosynthesis	Energy metabolism
T01-03_TRINITY_DN10068_c0_g1_i10	1	(A)16	16	CAGCACCGGTCTGAGCATTA	60.108	20	ACTGGTGATGATCCATGGCC	59.816	20	215	Galactose metabolism; Other glycan degradation; Glycosaminoglycan degradation; Glycosphingolipid biosynthesis - ganglio series; Sphingolipid metabolism	Carbohydrate metabolism; Glycan biosynthesis and metabolism; Lipid metabolism
T01-03_TRINITY_DN10068_c0_g1_i10	1	(T)11	11	GGCCATGGATCATCACCAGT	59.816	20	ACTCAAGGAGCCTAGGAACCA	60.203	21	116	Galactose metabolism; Other glycan degradation; Glycosaminoglycan degradation; Glycosphingolipid biosynthesis - ganglio series; Sphingolipid metabolism	Carbohydrate metabolism; Glycan biosynthesis and metabolism; Lipid metabolism
T01-03_TRINITY_DN10069_c0_g1_i8	1	(AT)9	18	CTCCAGGATTCGGTTGACCC	60.108	20	CTCGCGTGTTGATCACTCCT	60.109	20	271	Pentose and glucuronate interconversions	Carbohydrate metabolism
T01-03_TRINITY_DN10073_c0_g1_i5	1	(T)10	10	GTTTTGCAAAGTACTCACCCCA	59.309	22	CAAACAGTTGGCAATCGGGG	60.038	20	167	Glycosaminoglycan degradation	Glycan biosynthesis and metabolism
T01-03_TRINITY_DN10074_c1_g1_i1	1	(A)12	12	ACTCCCTGGAAAACTAAGAACCT	59.019	23	TCTTGGAGATGGGACCCACT	59.881	20	220	Glycerophospholipid metabolism; Phosphonate and phosphinate metabolism	Lipid metabolism; Metabolism of other amino acids
T01-03_TRINITY_DN10074_c1_g1_i1	2	(A)16	16	ACTCCCTGGAAAACTAAGAACCT	59.019	23	TCTTGGAGATGGGACCCACT	59.881	20	220	Glycerophospholipid metabolism; Phosphonate and phosphinate metabolism	Lipid metabolism; Metabolism of other amino acids
T01-03_TRINITY_DN10074_c1_g1_i1	1	(A)12	12	AGTGGGTCCCATCTCCAAGA	59.881	20	CCACTTTTACACCAGAAAGGCC	59.704	22	219	Glycerophospholipid metabolism; Phosphonate and phosphinate metabolism	Lipid metabolism; Metabolism of other amino acids
T01-03_TRINITY_DN10074_c1_g1_i1	2	(A)16tgactggaaaaatgactgatatttattattaagatttttgggctgaaaaaagtctttttactgaacaaataccgaaacac(T)13	109	AGTGGGTCCCATCTCCAAGA	59.881	20	CCACTTTTACACCAGAAAGGCC	59.704	22	219	Glycerophospholipid metabolism; Phosphonate and phosphinate metabolism	Lipid metabolism; Metabolism of other amino acids
T01-03_TRINITY_DN10074_c1_g1_i1	1	(T)13ccaatgtgtgcactctgtgctggtaaattggtggc(GCT)5	63	ACTGAGTTGCGGGAGTCATG	60.037	20	CTTCACTAGCAGTGGCACCC	60.675	20	197	Glycerophospholipid metabolism; Phosphonate and phosphinate metabolism	Lipid metabolism; Metabolism of other amino acids
T01-03_TRINITY_DN10120_c1_g5_i1	1	(AT)7	14	TGGGTTCAAGTGAGTACGATGT	59.369	22	AAGGCCGTTTCTTCTCGAGG	60.037	20	208	Photosynthesis	Energy metabolism
T01-03_TRINITY_DN102_c1_g1_i4	1	(CT)7cagctctgcaacagcagaatcagaattcagaaccctaaactctctt(TC)13	86	AGGATCGAACGGTTGTGCAT	60.036	20	GCTGTTGCAGAGCTGAGAGA	60.038	20	158	Starch and sucrose metabolism	Carbohydrate metabolism
T01-03_TRINITY_DN10317_c2_g1_i1	1	(A)10	10	ACGCATCCATCGGATAGAGG	59.109	20	ACCCAACAACAAGAAGTCCA	57.181	20	182	Oxidative phosphorylation	Energy metabolism
T01-03_TRINITY_DN10318_c0_g1_i8	1	(TC)6	12	TCGATGGGGTTTGCCGTAAA	59.964	20	ATGGCATGCTCTTAGCTGGG	60.179	20	146	Purine metabolism	Nucleotide metabolism
T01-03_TRINITY_DN10318_c0_g1_i8	1	(A)10	10	TCCTGTTACCGATTTGTTCCCT	59.359	22	CCTCAACGTATGGCAAAAGGG	59.528	21	106	Purine metabolism	Nucleotide metabolism
T01-03_TRINITY_DN10318_c0_g1_i8	1	(GA)6	12	TGATGCCCTAATTCGGTGCA	59.746	20	CCACCACACATTTCTTGCCG	60.039	20	229	Purine metabolism	Nucleotide metabolism
T01-03_TRINITY_DN10336_c0_g1_i1	1	(T)15	15	GCATTCCAGGGGCATGTTTC	59.824	20	CGTGCATTGGTCTGAGCTTC	59.555	20	266	Porphyrin metabolism	Metabolism of cofactors and vitamins
T01-03_TRINITY_DN10342_c0_g1_i15	1	(TTTA)5	20	CACCCATGGTTTTGCTCTTGA	59.037	21	CTGAATGCATGCTTCAGCCC	59.898	20	208	N-Glycan biosynthesis	Glycan biosynthesis and metabolism
T01-03_TRINITY_DN10363_c0_g7_i1	1	(AAAT)5	20	TGCCGATGTATAAGGTAGCACT	59.037	22	ACGATTTCTCCAGACAGCCA	59.023	20	106	Glycine, serine and threonine metabolism; Phenylalanine, tyrosine and tryptophan biosynthesis	Amino acid metabolism
T01-03_TRINITY_DN10370_c0_g1_i1	1	(T)10	10	TGCAGTATGGAGCGTCAAGT	59.392	20	GGGTTTGTCGTAAGTGGCCA	60.536	20	103	Glycine, serine and threonine metabolism; Valine, leucine and isoleucine degradation; Glycolysis / Gluconeogenesis; Citrate cycle (TCA cycle); Pyruvate metabolism; Glyoxylate and dicarboxylate metabolism; Propanoate metabolism	Amino acid metabolism; Carbohydrate metabolism
T01-03_TRINITY_DN10370_c0_g2_i1	1	(A)10	10	TCGTAAGTGGCCATAGCAGC	60.179	20	CCTTGCAGTATGGAGCGTCA	60.108	20	99	Glycine, serine and threonine metabolism; Valine, leucine and isoleucine degradation; Glycolysis / Gluconeogenesis; Citrate cycle (TCA cycle); Pyruvate metabolism; Glyoxylate and dicarboxylate metabolism; Propanoate metabolism	Amino acid metabolism; Carbohydrate metabolism
T01-03_TRINITY_DN1039_c0_g2_i2	1	(T)12	12	ATGTGCTGGCTTTCTGGACC	60.61	20	CTCCGTTGGTCCGAAGTACC	60.109	20	162	Lysine degradation	Amino acid metabolism
T01-03_TRINITY_DN1042_c0_g1_i7	1	(A)12	12	GCGACTCTTCTGAAATCAACCC	59.583	22	CCTTCCCTTTCAACCTCTCCA	59.295	21	151	Phenylalanine, tyrosine and tryptophan biosynthesis	Amino acid metabolism
T01-03_TRINITY_DN10435_c0_g1_i1	1	(A)10	10	ACGCGCATGTTCTCCATTTG	59.831	20	TGGCTGGTCGTAGGTAAGAGA	59.995	21	121	Nitrogen metabolism	Energy metabolism
T01-03_TRINITY_DN10435_c0_g2_i2	1	(T)10	10	TGGCTGGTCGTAGGTAAGAGA	59.995	21	ACGCGCATGTTCTCCATTTG	59.831	20	121	Nitrogen metabolism	Energy metabolism
T01-03_TRINITY_DN10436_c8_g1_i1	1	(A)14	14	ACACATTCTCGAAGCGTGGA	59.683	20	TCACAAGCCGTGGTAGATGC	60.391	20	224	Ether lipid metabolism	Lipid metabolism
T01-03_TRINITY_DN1048_c0_g1_i3	1	(A)10	10	TTGAATTGGGAGTGGGTGCA	59.813	20	TGGGTGTCTCCACATTCCTA	57.664	20	101	Folate biosynthesis	Metabolism of cofactors and vitamins
T01-03_TRINITY_DN10481_c0_g1_i1	1	(T)10	10	CATGTGGCAGGTGTAGAGCA	60.036	20	TGAGGGGTTGCCATTTCAAC	58.663	20	195	Valine, leucine and isoleucine biosynthesis; Butanoate metabolism; C5-Branched dibasic acid metabolism; Pantothenate and CoA biosynthesis	Amino acid metabolism; Carbohydrate metabolism; Metabolism of cofactors and vitamins
T01-03_TRINITY_DN10533_c0_g1_i2	1	(A)10	10	ACCGACACTAATTTCGCCGA	59.756	20	GGAAGAAGTTGGGGGAGACG	60.036	20	212	Brassinosteroid biosynthesis	Metabolism of terpenoids and polyketides
T01-03_TRINITY_DN1054_c0_g1_i1	1	(TC)7	14	CCGATCGAATGTCCCAACCA	60.108	20	AGATGTTCGCGTTTGGCTAGA	60.067	21	177	Glutathione metabolism; Metabolism of xenobiotics by cytochrome P450; Drug metabolism - cytochrome P450; Drug metabolism - other enzymes	Metabolism of other amino acids; Xenobiotics biodegradation and metabolism
T01-03_TRINITY_DN1054_c0_g1_i1	1	(A)11	11	CACGCCTCACCCACTAAGTT	59.965	20	AGCAAAGGCAGCTGTAGAGG	60.036	20	106	Glutathione metabolism; Metabolism of xenobiotics by cytochrome P450; Drug metabolism - cytochrome P450; Drug metabolism - other enzymes	Metabolism of other amino acids; Xenobiotics biodegradation and metabolism
T01-03_TRINITY_DN1054_c0_g1_i1	1	(T)11	11	GCAACTCGAGGTAAAACAGCC	59.803	21	TCAAAATGAGGGCTCGTCGC	61.019	20	255	Glutathione metabolism; Metabolism of xenobiotics by cytochrome P450; Drug metabolism - cytochrome P450; Drug metabolism - other enzymes	Metabolism of other amino acids; Xenobiotics biodegradation and metabolism
T01-03_TRINITY_DN1054_c0_g2_i11	1	(T)11	11	AGCAAAGGCAGCTGTAGAGG	60.036	20	CACGCCTCACCCACTAAGTT	59.965	20	106	Glutathione metabolism; Metabolism of xenobiotics by cytochrome P450; Drug metabolism - cytochrome P450; Drug metabolism - other enzymes	Metabolism of other amino acids; Xenobiotics biodegradation and metabolism
T01-03_TRINITY_DN10540_c1_g2_i2	1	(T)17	17	AAATATGGGTGGGTGTCAGTT	57.174	21	AGAACCAAAACCCAAACCACA	58.459	21	167	Arachidonic acid metabolism	Lipid metabolism
T01-03_TRINITY_DN10540_c1_g2_i2	1	(T)10	10	TGTGGTTTGGGTTTTGGTTCT	58.459	21	ACCCATTCGTCACAAAAGGA	57.35	20	198	Arachidonic acid metabolism	Lipid metabolism
T01-03_TRINITY_DN10540_c1_g2_i2	2	(ATT)6	18	TGTGGTTTGGGTTTTGGTTCT	58.459	21	ACCCATTCGTCACAAAAGGA	57.35	20	198	Arachidonic acid metabolism	Lipid metabolism
T01-03_TRINITY_DN10540_c1_g2_i2	1	(A)11	11	AGATGGGTTTGGTTTTGAGGT	57.671	21	TTGCGTCATTTCACATTTTCCT	57.417	22	186	Arachidonic acid metabolism	Lipid metabolism
T01-03_TRINITY_DN10544_c0_g1_i14	1	(A)10	10	TGAGAATTCAGGAAACAAAAACCA	57.463	24	AGCCACAACTCATGAGCGAA	59.965	20	256	Folate biosynthesis	Metabolism of cofactors and vitamins
T01-03_TRINITY_DN10544_c0_g3_i5	1	(TAT)5	15	GGACTAGTCCCTACGGTCTCA	59.789	21	GCTCCCTCTGGTTGTGTGTT	60.179	20	104	Nicotinate and nicotinamide metabolism; Pyrimidine metabolism	Metabolism of cofactors and vitamins; Nucleotide metabolism
T01-03_TRINITY_DN10544_c0_g4_i12	1	(A)10	10	GGTTTTGTTTCAGTTGTCCCCA	59.502	22	CCCACATTGGCTGAAGGGAT	60.033	20	101	Folate biosynthesis	Metabolism of cofactors and vitamins
T01-03_TRINITY_DN10544_c0_g4_i12	1	(T)10	10	AGCCACAACTCATGAGCGAA	59.965	20	TGAGAATTCAGGAAACAAAAACCA	57.463	24	256	Folate biosynthesis	Metabolism of cofactors and vitamins
T01-03_TRINITY_DN10544_c0_g4_i12	1	(TA)7	14	ATTTTAGGTGGCACGGGCTT	60.252	20	GGCGTCACCTTGAGAGACTC	60.109	20	121	Folate biosynthesis	Metabolism of cofactors and vitamins
T01-03_TRINITY_DN1060_c0_g2_i1	1	(GA)14	28	ACCTCGACCGTTGGATTTCC	60.037	20	CCGCATCATCCATCACCAGA	59.893	20	154	Glycolysis / Gluconeogenesis; Methane metabolism	Carbohydrate metabolism; Energy metabolism
T01-03_TRINITY_DN10614_c1_g1_i1	1	(T)11	11	TGGGGATTTCAATGACGGCT	59.669	20	GCACTCGATTCCATCCCCAT	59.891	20	241	Nicotinate and nicotinamide metabolism; Purine metabolism; Pyrimidine metabolism	Metabolism of cofactors and vitamins; Nucleotide metabolism
T01-03_TRINITY_DN10614_c1_g1_i1	2	(CTT)5	15	TGGGGATTTCAATGACGGCT	59.669	20	GCACTCGATTCCATCCCCAT	59.891	20	241	Nicotinate and nicotinamide metabolism; Purine metabolism; Pyrimidine metabolism	Metabolism of cofactors and vitamins; Nucleotide metabolism
T01-03_TRINITY_DN10633_c0_g1_i1	1	(A)10	10	GGATGCAGCAATGAAGCACC	60.179	20	TTGGGCCTTTCCTACATCAG	57.193	20	206	Glycolysis / Gluconeogenesis	Carbohydrate metabolism
T01-03_TRINITY_DN10633_c0_g2_i1	1	(T)20	20	CAAATCCTGAACCATTGGGCC	59.792	21	CTCAGCTTTGCGGAGTGGA	60.005	19	99	Glycolysis / Gluconeogenesis	Carbohydrate metabolism
T01-03_TRINITY_DN1065_c6_g1_i1	1	(T)10	10	GTGTGACCTTGCAAATGCTCA	59.662	21	TGGAATTGCCTCCATGGGAT	59.064	20	138	Nicotinate and nicotinamide metabolism	Metabolism of cofactors and vitamins
T01-03_TRINITY_DN10651_c0_g1_i15	1	(T)14	14	TTCGGCCCGGGAAAAGTTAA	59.89	20	TGATTGCCGTCCACTTCTGT	59.604	20	243	Starch and sucrose metabolism	Carbohydrate metabolism
T01-03_TRINITY_DN10651_c0_g1_i15	1	(T)10	10	ACAGAAGTGGACGGCAATCA	59.604	20	TTCTTGCTGACTGCTGCGTA	59.967	20	270	Starch and sucrose metabolism	Carbohydrate metabolism
T01-03_TRINITY_DN10666_c0_g2_i3	1	(A)10	10	ATTTCGAGGTGACTTGGCCG	60.674	20	CATCTTGTTTGCGGCCAAGT	59.685	20	125	Monoterpenoid biosynthesis	Metabolism of terpenoids and polyketides
T01-03_TRINITY_DN10698_c0_g1_i1	1	(A)21	21	CCAGCTGAGTTGGCCTAGTT	59.674	20	AGTCAGGACAGGGGAAAGGA	59.806	20	177	Arachidonic acid metabolism; Folate biosynthesis; Metabolism of xenobiotics by cytochrome P450	Lipid metabolism; Metabolism of cofactors and vitamins; Xenobiotics biodegradation and metabolism
T01-03_TRINITY_DN107_c1_g1_i2	1	(A)12	12	GTGATCAGAGCGCTTTTCGG	59.628	20	TCTCTGGACTTCACGTGATGC	60.068	21	111	Starch and sucrose metabolism; Amino sugar and nucleotide sugar metabolism	Carbohydrate metabolism
T01-03_TRINITY_DN107_c1_g1_i2	2	(CT)7	14	GTGATCAGAGCGCTTTTCGG	59.628	20	TCTCTGGACTTCACGTGATGC	60.068	21	111	Starch and sucrose metabolism; Amino sugar and nucleotide sugar metabolism	Carbohydrate metabolism
T01-03_TRINITY_DN1072_c1_g2_i1	1	(AG)11	22	TTCGGCGTATCAGAAGCTCC	59.898	20	GGCTCCTTAGGAACAGCGTT	60.036	20	104	Tyrosine metabolism	Amino acid metabolism
T01-03_TRINITY_DN10734_c0_g1_i1	1	(T)15	15	TGGTCAACCTTTAGGCCATGT	59.573	21	AGTCCCTTTCAAGCTGTACTGT	59.294	22	178	Inositol phosphate metabolism	Carbohydrate metabolism
T01-03_TRINITY_DN10734_c0_g1_i1	1	(T)11	11	TCGGGTCATATGGTTAGGGGA	59.779	21	ACTCGCCCTGCATCTCTTTC	60.108	20	137	Inositol phosphate metabolism	Carbohydrate metabolism
T01-03_TRINITY_DN10736_c0_g1_i4	1	(TA)7	14	ACCAGCCATCTTCCAACTCT	58.634	20	AGGGTTTCCAACAAAGGGTT	57.439	20	105	Glyoxylate and dicarboxylate metabolism; Butanoate metabolism	Carbohydrate metabolism
T01-03_TRINITY_DN10796_c0_g1_i6	1	(CA)10gacaaaaagagttatcaaggctcaataatt(CA)14	78	CCTGCCCTGGAGTAGTGTCT	60.616	20	ACAGTCTCTGAGTCGACCCA	59.889	20	269	Phenylpropanoid biosynthesis	Biosynthesis of other secondary metabolites
T01-03_TRINITY_DN10796_c0_g1_i6	2	(T)10	10	CCTGCCCTGGAGTAGTGTCT	60.616	20	ACAGTCTCTGAGTCGACCCA	59.889	20	269	Phenylpropanoid biosynthesis	Biosynthesis of other secondary metabolites
T01-03_TRINITY_DN10796_c0_g2_i3	1	(A)10	10	GGCAAAGTTCAAAGATGTCAGGA	59.43	23	TCGGTCCATTCATTGATTGCT	57.997	21	205	Phenylpropanoid biosynthesis	Biosynthesis of other secondary metabolites
T01-03_TRINITY_DN10796_c0_g2_i3	1	(T)13	13	TTAGCGCGAACCCAAACAAC	59.692	20	GTGCCATGTGTCAGCCAAAG	60.039	20	258	Phenylpropanoid biosynthesis	Biosynthesis of other secondary metabolites
T01-03_TRINITY_DN10796_c0_g2_i3	1	(GA)7	14	TCTTGTTGGTTTACGCGGGA	59.894	20	TCCGCAAGAGGACAGCTTTC	60.321	20	232	Phenylpropanoid biosynthesis	Biosynthesis of other secondary metabolites
T01-03_TRINITY_DN10796_c0_g3_i3	1	(T)10	10	TCAAGTTGACAGGCGAGCAT	59.965	20	TCGGTTTGGCTCACAGAACA	59.821	20	100	Taurine and hypotaurine metabolism	Metabolism of other amino acids
T01-03_TRINITY_DN10805_c1_g1_i4	1	(CT)8	16	GAAAAACCACTCCCCACCCA	60.106	20	GAACACAACCACCCCAAACG	59.898	20	236	Phenylalanine, tyrosine and tryptophan biosynthesis	Amino acid metabolism
T01-03_TRINITY_DN10833_c0_g1_i1	1	(A)16	16	ACTGCTGTCCTACACTGATGTC	59.768	22	ATTTCTGACGTGGAGGTGCG	60.671	20	259	Glutathione metabolism; Metabolism of xenobiotics by cytochrome P450; Drug metabolism - cytochrome P450; Drug metabolism - other enzymes	Metabolism of other amino acids; Xenobiotics biodegradation and metabolism
T01-03_TRINITY_DN10847_c0_g1_i3	1	(TA)6	12	CCTGAGGCCTTCTTGACGAT	59.461	20	ACTGTGAGGTTCCACCAAGT	58.787	20	126	Oxidative phosphorylation	Energy metabolism
T01-03_TRINITY_DN10847_c0_g1_i3	1	(T)21	21	TGTGTGTCCTTGTGTCTGGT	59.091	20	CCAGTTGTTTGCGAGTAGGG	58.843	20	248	Oxidative phosphorylation	Energy metabolism
T01-03_TRINITY_DN10848_c1_g1_i4	1	(AC)13	26	CCAGCCCCTCTGCCATTAAA	60.033	20	CGTGTGTGTGTGTGTGTGTG	60.179	20	106	Terpenoid backbone biosynthesis	Metabolism of terpenoids and polyketides
T01-03_TRINITY_DN10861_c0_g1_i1	1	(T)12	12	GCAAGTATGGGAGGTCAGCA	59.747	20	CCCGCACACACATTTTCAAT	57.563	20	209	Porphyrin metabolism	Metabolism of cofactors and vitamins
T01-03_TRINITY_DN10882_c0_g1_i1	1	(T)10cccgatgttgacatgagttggtttatgcgaggacccttaatttattccaactttttcatatttttaactcgttaaagttg(T)13	103	TGGTTTATGCGAGGACCCTT	59.011	20	GACACCTTGAAGCCTTCCGA	59.965	20	221	Terpenoid backbone biosynthesis	Metabolism of terpenoids and polyketides
T01-03_TRINITY_DN1089_c1_g2_i4	1	(CCA)6	18	CACCACCACCACCTGTTGTA	59.818	20	TGGTGGTGTTTCTGCTGGTT	60.034	20	118	Cysteine and methionine metabolism; Selenocompound metabolism	Amino acid metabolism; Metabolism of other amino acids
T01-03_TRINITY_DN10898_c0_g4_i2	1	(CT)16	32	TAGACCGGATTCACCCCAGT	59.958	20	TCTTCCCCAAACTCCAACAAGA	59.488	22	248	Valine, leucine and isoleucine degradation; Propanoate metabolism	Amino acid metabolism; Carbohydrate metabolism
T01-03_TRINITY_DN1090_c0_g1_i6	1	(T)17	17	TCTAGGGTCGAGTTCATCCGA	59.789	21	ACGGCGTCTTCGATTTTACG	59.013	20	198	Glycolysis / Gluconeogenesis; Methane metabolism	Carbohydrate metabolism; Energy metabolism
T01-03_TRINITY_DN1090_c0_g1_i6	1	(T)14	14	ATGGTTGAGCTGTACACGCA	59.965	20	TCCTTGTCAAATGGCTCCTCA	59.295	21	182	Glycolysis / Gluconeogenesis; Methane metabolism	Carbohydrate metabolism; Energy metabolism
T01-03_TRINITY_DN10929_c1_g1_i1	1	(A)20	20	CAGCCACAAAACAAGAGCCC	59.967	20	CCTTTTGCCATCTGTTGGGG	59.39	20	230	Sphingolipid metabolism	Lipid metabolism
T01-03_TRINITY_DN10934_c1_g1_i1	1	(GT)9	18	ACGGCAGACAAGCATAACCA	59.964	20	GCTCTTGGTGAAGCTGAGGT	59.964	20	252	Porphyrin metabolism	Metabolism of cofactors and vitamins
T01-03_TRINITY_DN1098_c0_g1_i6	1	(GT)12	24	TTCAGGCAGCCACAGCAATA	59.962	20	GGGTGGGAGAGAGACAGTCT	59.96	20	217	Lysine degradation	Amino acid metabolism
T01-03_TRINITY_DN1098_c0_g1_i6	1	(TG)8	16	AGACTGTCTCTCTCCCACCC	59.96	20	TGGAGGTATTTGGACTGGAACC	59.692	22	163	Lysine degradation	Amino acid metabolism
T01-03_TRINITY_DN1098_c0_g1_i6	1	(TCA)7	21	CATCTTCACCCCTGAGAGCC	59.82	20	GGGTGAAGCAGAAAATCCGG	59.189	20	106	Lysine degradation	Amino acid metabolism
T01-03_TRINITY_DN11_c0_g3_i1	1	(TCC)5	15	ATGGTTCCTCCTCCTCCTCC	60.031	20	TGGTCTGTGCTTGGGTCATC	59.963	20	106	Cysteine and methionine metabolism	Amino acid metabolism
T01-03_TRINITY_DN11000_c0_g1_i7	1	(T)10	10	TGCACTTGAGTTCCTTACCCT	58.945	21	AGTGTGTCTGCAGTGATCCT	58.654	20	156	Pyruvate metabolism	Carbohydrate metabolism
T01-03_TRINITY_DN11000_c0_g1_i7	1	(T)14	14	TTGGCTCATGTTCTTGGGCA	60.179	20	TGTGTTTGAAGAACATGCCCAG	59.638	22	213	Pyruvate metabolism	Carbohydrate metabolism
T01-03_TRINITY_DN11000_c0_g1_i7	1	(T)10	10	GTAGTGCTCCTGGTCCACAC	60.037	20	AGGGCAAGCTTGGTCTGATC	60.035	20	99	Pyruvate metabolism	Carbohydrate metabolism
T01-03_TRINITY_DN1102_c0_g1_i2	1	(A)11	11	ATCCAATCATGAGTGCCCCC	59.813	20	TAGATCTAGGGACCGGTGGC	60.179	20	187	Valine, leucine and isoleucine degradation; Propanoate metabolism	Amino acid metabolism; Carbohydrate metabolism
T01-03_TRINITY_DN11059_c0_g1_i3	1	(CAA)5	15	TGACTGTGTGTGGGACTGTG	59.822	20	AGCAAGAGAGTGGTGCTTCC	59.964	20	119	Starch and sucrose metabolism	Carbohydrate metabolism
T01-03_TRINITY_DN11059_c0_g1_i3	1	(A)10t(A)10	21	AGTGATCGTACTCCGCCAAC	59.827	20	ACAACTCGACAAGTGGGGTC	59.894	20	213	Starch and sucrose metabolism	Carbohydrate metabolism
T01-03_TRINITY_DN11059_c0_g1_i3	1	(A)13	13	AGCTCCACGTGAAAAGAGGA	58.951	20	GCACTGATACGGTAGCCCAA	59.823	20	116	Starch and sucrose metabolism	Carbohydrate metabolism
T01-03_TRINITY_DN11103_c0_g1_i9	1	(A)13	13	CAAATTTACCCCGACATGAAGTGT	59.782	24	TCACAAGCAAGTTATTGGTCTTTCA	59.408	25	100	Nicotinate and nicotinamide metabolism	Metabolism of cofactors and vitamins
T01-03_TRINITY_DN11103_c0_g1_i9	2	(A)10	10	CAAATTTACCCCGACATGAAGTGT	59.782	24	TCACAAGCAAGTTATTGGTCTTTCA	59.408	25	100	Nicotinate and nicotinamide metabolism	Metabolism of cofactors and vitamins
T01-03_TRINITY_DN11106_c2_g1_i1	1	(T)18	18	CGTCTCAAACGCATCGGAAA	59.212	20	TCGATGCAACGAGAAGACAGA	59.46	21	102	Glycerophospholipid metabolism; Ether lipid metabolism	Lipid metabolism
T01-03_TRINITY_DN11131_c0_g4_i3	1	(A)14	14	TCCCTACTTGATAGTCGTGGGA	59.757	22	GGGACATGTCTTGCTTTGGC	59.755	20	197	Sphingolipid metabolism	Lipid metabolism
T01-03_TRINITY_DN11131_c0_g4_i3	1	(T)17acattaattattcatttatttctcccagccttttgtttcaaacacatttcttccaacttagaacttaaaaaaatg(T)10	102	AGCATCAACCACACCGTGAA	60.179	20	GTGGAAGAAGTAGGGCTGCC	60.393	20	263	Sphingolipid metabolism	Lipid metabolism
T01-03_TRINITY_DN11147_c0_g1_i1	1	(A)13	13	ATGACATCGCTTACGTCCCC	59.896	20	CACACACAAGGGCATTTCCG	60.039	20	176	Steroid biosynthesis	Lipid metabolism
T01-03_TRINITY_DN1117_c0_g2_i2	1	(T)15	15	CCAGATCGTATGTTACAGTTGGC	59.444	23	AGATCTGTTCAACCGCTACCA	59.1	21	220	Pyrimidine metabolism; Drug metabolism - other enzymes	Nucleotide metabolism; Xenobiotics biodegradation and metabolism
T01-03_TRINITY_DN11215_c0_g1_i6	1	(TCA)5	15	GCTAATGCGTGAGGAGTTGG	58.99	20	GGGCAGGAAGGAAAGGGTAC	60.034	20	236	Ascorbate and aldarate metabolism; Glutathione metabolism	Carbohydrate metabolism; Metabolism of other amino acids
T01-03_TRINITY_DN11240_c2_g1_i3	1	(A)11	11	ATCTGTTAGGGGGTGGTGGT	60.179	20	TCCTTGCTTGCAGTGGTGAT	59.889	20	144	Steroid hormone biosynthesis	Lipid metabolism
T01-03_TRINITY_DN11264_c0_g1_i1	1	(T)10	10	TCCTCCCTTTGAAGCTCCAA	58.555	20	TGGGTGGTTTGATTCTCCCA	58.846	20	107	Other types of O-glycan biosynthesis	Glycan biosynthesis and metabolism
T01-03_TRINITY_DN1127_c0_g2_i4	1	(CA)7	14	CCCCAGCTGCTCTCTTCATC	60.179	20	TGTGTGTGTGAAAGAAAGGGTG	59.248	22	150	Ascorbate and aldarate metabolism; Inositol phosphate metabolism	Carbohydrate metabolism
T01-03_TRINITY_DN1127_c0_g2_i4	1	(A)10	10	GGGACACACAAAACCCAGGT	60.397	20	CATTGGAACGGGCCTGGATA	59.817	20	228	Ascorbate and aldarate metabolism; Inositol phosphate metabolism	Carbohydrate metabolism
T01-03_TRINITY_DN1127_c0_g2_i4	1	(T)11	11	CCAATGGACCCGATGCCTTA	59.817	20	ACCATCTGAGCTTAGCAGGG	59.164	20	200	Ascorbate and aldarate metabolism; Inositol phosphate metabolism	Carbohydrate metabolism
T01-03_TRINITY_DN11284_c0_g2_i1	1	(T)11	11	GCAGGAGAGGAGGCTTGAAA	59.674	20	CGAGGGTTTTTGGACAAGCA	58.971	20	104	Oxidative phosphorylation	Energy metabolism
T01-03_TRINITY_DN1129_c0_g1_i8	1	(TTTC)5	20	CACACCTAAGCCCACTGCAA	60.537	20	GTCAGCACTTGAAACACAGCT	59.327	21	100	Terpenoid backbone biosynthesis	Metabolism of terpenoids and polyketides
T01-03_TRINITY_DN113_c0_g1_i4	1	(CTT)5	15	TTGACATGCCTGCAAGTCCA	60.179	20	TCGGTTCTCTCTGGAGACGA	59.676	20	136	Carotenoid biosynthesis	Metabolism of terpenoids and polyketides
T01-03_TRINITY_DN113_c0_g1_i4	1	(AG)13	26	AAGACGCCATGGTTGCCTAA	59.962	20	AGCCGCATCTTCTCATCTGG	59.894	20	180	Carotenoid biosynthesis	Metabolism of terpenoids and polyketides
T01-03_TRINITY_DN113_c0_g1_i4	1	(GA)7	14	TCTTGCGAGAGAGAGAGAGAGT	59.764	22	TAAGGTTGGCCATGCAAAGG	58.735	20	114	Carotenoid biosynthesis	Metabolism of terpenoids and polyketides
T01-03_TRINITY_DN1135_c0_g1_i13	1	(A)13	13	TTGTGACGATGGAGCAGCTT	59.965	20	AGGCCAATCCAACGAAGGAA	59.596	20	143	Phenylpropanoid biosynthesis; Starch and sucrose metabolism; Cyanoamino acid metabolism; Purine metabolism	Biosynthesis of other secondary metabolites; Carbohydrate metabolism; Metabolism of other amino acids; Nucleotide metabolism
T01-03_TRINITY_DN11385_c0_g1_i6	1	(A)17	17	ACTCCTAACAGCCGTCGTCT	60.609	20	GCAAACAGCAAGCACCCATT	60.25	20	136	Glycolysis / Gluconeogenesis; Carbon fixation in photosynthetic organisms	Carbohydrate metabolism; Energy metabolism
T01-03_TRINITY_DN11385_c0_g1_i6	1	(TTC)5	15	CTCAGCATCCTTGTTTTTCCCA	59.107	22	ACCAAGACACGAGTTTCACGA	59.864	21	247	Glycolysis / Gluconeogenesis; Carbon fixation in photosynthetic organisms	Carbohydrate metabolism; Energy metabolism
T01-03_TRINITY_DN11390_c0_g2_i1	1	(TA)7	14	CTCCCACGATTCAGGCTGTT	60.036	20	ATTGACACCCGTGAAGCCTT	59.89	20	142	Oxidative phosphorylation	Energy metabolism
T01-03_TRINITY_DN11402_c1_g1_i1	1	(TA)6	12	TGCTCTTATTGCCCCCACAA	59.592	20	TGGTATTGACATGAACGCAAGA	58.33	22	99	Alanine, aspartate and glutamate metabolism	Amino acid metabolism
T01-03_TRINITY_DN11440_c0_g1_i4	1	(ATC)5	15	GCAGCATCAAAGCCTTGTCC	60.109	20	CCACAGAATGGGTTGAAAGCA	59.037	21	105	Oxidative phosphorylation	Energy metabolism
T01-03_TRINITY_DN11446_c0_g1_i2	1	(T)10ggg(GT)7	27	TGACTTAAGGCGAGCAAGGG	60.036	20	CTTGCCCTTCAGCTGTGGTA	59.963	20	99	Carbon fixation in photosynthetic organisms	Energy metabolism
T01-03_TRINITY_DN11447_c0_g1_i8	1	(T)10	10	CACCCTGACAAATGCCAAGA	58.38	20	TCCCTTGCTGACAATGGACC	59.962	20	216	Oxidative phosphorylation; Photosynthesis	Energy metabolism
T01-03_TRINITY_DN11447_c0_g4_i2	1	(A)14	14	GGGATAAGTGATATCTGCATGGGT	60.019	24	TGCCAAGGATAGGTCATTTGAGT	59.733	23	114	Oxidative phosphorylation; Photosynthesis	Energy metabolism
T01-03_TRINITY_DN1145_c0_g4_i1	1	(GAA)5	15	CGGCATTGGTGAGTGTTGTG	60.04	20	GGGGCCGTTGTTGGAATTTC	60.038	20	191	Porphyrin metabolism	Metabolism of cofactors and vitamins
T01-03_TRINITY_DN1145_c0_g4_i1	2	(A)10	10	CGGCATTGGTGAGTGTTGTG	60.04	20	GGGGCCGTTGTTGGAATTTC	60.038	20	191	Porphyrin metabolism	Metabolism of cofactors and vitamins
T01-03_TRINITY_DN1145_c0_g4_i1	1	(A)10	10	GAAATTCCAACAACGGCCCC	60.038	20	CGACTTCAACCTCTCGCTGT	60.039	20	186	Porphyrin metabolism	Metabolism of cofactors and vitamins
T01-03_TRINITY_DN1145_c0_g4_i1	1	(AG)6	12	GGTTGAGGTCGTGCCGTC	60.737	18	AAGTCGAAAACCCTCGCTCC	60.321	20	103	Porphyrin metabolism	Metabolism of cofactors and vitamins
T01-03_TRINITY_DN1145_c0_g4_i1	2	(AG)8	16	GGTTGAGGTCGTGCCGTC	60.737	18	AAGTCGAAAACCCTCGCTCC	60.321	20	103	Porphyrin metabolism	Metabolism of cofactors and vitamins
T01-03_TRINITY_DN1145_c1_g1_i29	1	(TC)7tagtacagaacactaataagtttaga(AAG)5	55	GGAAGACGCTGTGAAGAGGA	59.396	20	GGTGATGTGAACCCTGCAGA	59.963	20	267	Riboflavin metabolism	Metabolism of cofactors and vitamins
T01-03_TRINITY_DN11474_c0_g1_i1	1	(AT)6	12	GGCCGAGGATACCCATATGC	60.108	20	GATGGTTACCTGACTGGGCC	60.107	20	155	Thiamine metabolism; Terpenoid backbone biosynthesis	Metabolism of cofactors and vitamins; Metabolism of terpenoids and polyketides
T01-03_TRINITY_DN1151_c0_g1_i11	1	(CT)21	42	CCCTTGTGAATGACCGTGGA	59.964	20	TCCCAAGAAGAGAGGATGTTGC	60.027	22	243	Starch and sucrose metabolism	Carbohydrate metabolism
T01-03_TRINITY_DN1151_c0_g2_i23	1	(GA)20	40	TCCCAAGAAGAGAGGATGTTGC	60.027	22	CCCTTGTGAATGACCGTGGA	59.964	20	241	Starch and sucrose metabolism	Carbohydrate metabolism
T01-03_TRINITY_DN11519_c0_g1_i17	1	(T)17	17	AGAACAGTTTACAGCTTGTGTGT	58.738	23	CTGAGTGAGAGCAGCAAGTCA	59.999	21	198	Purine metabolism	Nucleotide metabolism
T01-03_TRINITY_DN11519_c0_g1_i17	1	(T)10	10	GGTCTGTGGGCCCATATCAA	59.449	20	TGAGGCAACAATTCTCACCCA	59.855	21	158	Purine metabolism	Nucleotide metabolism
T01-03_TRINITY_DN1154_c1_g2_i3	1	(T)11	11	TCGTTTGGGGTTCTTTGGCA	60.396	20	CGCCATCAATTGAACTGGCA	59.473	20	159	Purine metabolism	Nucleotide metabolism
T01-03_TRINITY_DN1155_c0_g2_i11	1	(T)14	14	AACAGCGAGGGAAATCTGGG	60.035	20	TCCCCCACAACACAACACAA	59.96	20	147	Alanine, aspartate and glutamate metabolism; Purine metabolism	Amino acid metabolism; Nucleotide metabolism
T01-03_TRINITY_DN11604_c0_g1_i10	1	(TG)6	12	AGGTTTTCTGTGTGTGTGTGT	58.21	21	TTAGTGGTCAGCGTGAAGGC	60.32	20	120	Brassinosteroid biosynthesis	Metabolism of terpenoids and polyketides
T01-03_TRINITY_DN11604_c0_g1_i10	2	(A)12	12	AGGTTTTCTGTGTGTGTGTGT	58.21	21	TTAGTGGTCAGCGTGAAGGC	60.32	20	120	Brassinosteroid biosynthesis	Metabolism of terpenoids and polyketides
T01-03_TRINITY_DN11604_c0_g1_i10	1	(TG)6	12	GCCTTCACGCTGACCACTAA	60.32	20	ACCTTGGAAAGCATGACCCT	59.22	20	182	Brassinosteroid biosynthesis	Metabolism of terpenoids and polyketides
T01-03_TRINITY_DN11604_c0_g1_i10	2	(A)12	12	GCCTTCACGCTGACCACTAA	60.32	20	ACCTTGGAAAGCATGACCCT	59.22	20	182	Brassinosteroid biosynthesis	Metabolism of terpenoids and polyketides
T01-03_TRINITY_DN11623_c0_g1_i1	1	(TG)11(AG)18	58	GATCCACTCCATCCGAACCC	59.893	20	TGGTGGTGGCCAAAGACTTT	60.033	20	252	Brassinosteroid biosynthesis	Metabolism of terpenoids and polyketides
T01-03_TRINITY_DN1166_c0_g1_i4	1	(ACA)7	21	TCAGACCCAGAGCAACCAAT	58.933	20	ACAGCCCCACCAAATCAACA	60.106	20	143	Porphyrin metabolism	Metabolism of cofactors and vitamins
T01-03_TRINITY_DN1166_c2_g1_i3	1	(TA)9	18	TGCATCTTGCCTCTTTGGGT	59.887	20	CGGAATGGTACGGCAATTGC	60.248	20	232	Glycerophospholipid metabolism; alpha-Linolenic acid metabolism	Lipid metabolism
T01-03_TRINITY_DN1176_c0_g1_i24	1	(T)11	11	TCCCTTATTAGAAGACCCTGCT	57.991	22	GAAGTGGGGAGGTGCTCATT	59.67	20	194	Glycerolipid metabolism	Lipid metabolism
T01-03_TRINITY_DN11770_c0_g1_i10	1	(T)11	11	TGGGAAAGAAGGGGTATTGGC	59.993	21	TTGCAACCCAACTACCCTGG	60.179	20	125	Glycolysis / Gluconeogenesis; Fructose and mannose metabolism; Inositol phosphate metabolism; Carbon fixation in photosynthetic organisms	Carbohydrate metabolism; Energy metabolism
T01-03_TRINITY_DN1178_c0_g1_i9	1	(TTC)5	15	AACAGCAACCACCTGGAGAG	59.891	20	TCAGCCATGCAACTTTATGGG	58.898	21	220	Glycosaminoglycan degradation	Glycan biosynthesis and metabolism
T01-03_TRINITY_DN11825_c0_g1_i2	1	(TC)8	16	TGCAATTCTTCCTTCGACGGA	59.998	21	CAGGGCTGACAAGAACCCAT	59.961	20	150	Amino sugar and nucleotide sugar metabolism	Carbohydrate metabolism
T01-03_TRINITY_DN11835_c2_g1_i1	1	(T)12	12	CCAGAGGCTTGGGATGTCC	59.774	19	TCCCCTTGACCCGTATGTCA	60.252	20	279	Glycerophospholipid metabolism; Ether lipid metabolism	Lipid metabolism
T01-03_TRINITY_DN11854_c0_g1_i10	1	(A)10	10	GTGCAAGGTCAAGCAATGCA	59.968	20	TGTGGTGGGTTTTGTCCTCT	59.077	20	146	Purine metabolism	Nucleotide metabolism
T01-03_TRINITY_DN11868_c0_g1_i1	1	(A)12	12	AGTGATTGGCATGAACGGGT	59.962	20	TAGTGCAGGTTGGCTCTTGG	59.963	20	263	Arginine and proline metabolism; Phenylalanine metabolism; Tryptophan metabolism; Aminobenzoate degradation; Styrene degradation	Amino acid metabolism; Xenobiotics biodegradation and metabolism
T01-03_TRINITY_DN11922_c1_g1_i11	1	(T)11	11	GTGACGAAAGATGACTGCGC	59.906	20	GAGCATTAACCACACCCCCA	59.961	20	140	Glycerophospholipid metabolism	Lipid metabolism
T01-03_TRINITY_DN11987_c0_g1_i1	1	(A)10	10	AGGGGCCGTTTGGTAATCAA	59.594	20	AGGAGAGGCGTAAAAGAATTGGA	59.737	23	276	Glycine, serine and threonine metabolism; Cysteine and methionine metabolism; Lysine biosynthesis; Monobactam biosynthesis	Amino acid metabolism; Biosynthesis of other secondary metabolites
T01-03_TRINITY_DN11987_c0_g1_i1	1	(CT)9	18	CGCCTCTCCTCTTCATCTCC	59.327	20	TGGGCCTACTCATCTTTAGCA	58.523	21	103	Glycine, serine and threonine metabolism; Cysteine and methionine metabolism; Lysine biosynthesis; Monobactam biosynthesis	Amino acid metabolism; Biosynthesis of other secondary metabolites
T01-03_TRINITY_DN12012_c0_g2_i1	1	(T)10gatagataagatacaactaaaggccggtcgagatgacccaccccataagagcagg(A)11	76	TCGCCCAGGTCAATATCCAC	59.532	20	CTGCTCTTATGGGGTGGGTC	59.819	20	118	Sphingolipid metabolism	Lipid metabolism
T01-03_TRINITY_DN12015_c3_g1_i1	1	(T)46	46	TACCATGAAGCGTGTGGACC	60.037	20	TGCTAAGGGCCTGGTTAGAT	58.107	20	204	Galactose metabolism; Glycosphingolipid biosynthesis - globo and isoglobo series; Glycerolipid metabolism; Sphingolipid metabolism	Carbohydrate metabolism; Glycan biosynthesis and metabolism; Lipid metabolism
T01-03_TRINITY_DN1204_c0_g1_i6	1	(AT)6	12	TGCGTATAGTGAAAATGGTTGGC	59.872	23	ACATTCTGGTGTTGGCACAT	58	20	137	Glycosylphosphatidylinositol (GPI)-anchor biosynthesis	Glycan biosynthesis and metabolism
T01-03_TRINITY_DN12065_c0_g1_i29	1	(AG)7	14	AAAACGTGCCGCAAAGTCTC	59.971	20	TCCCCAATCACGTCCTCATC	59.169	20	144	Terpenoid backbone biosynthesis	Metabolism of terpenoids and polyketides
T01-03_TRINITY_DN12065_c0_g1_i29	1	(T)11	11	TGGGAGAAAGAAACCAGCCC	59.888	20	TTTTGTGCAAAGTTTGGGCA	57.52	20	190	Terpenoid backbone biosynthesis	Metabolism of terpenoids and polyketides
T01-03_TRINITY_DN12065_c2_g1_i4	1	(GA)7	14	TGGTGGGTAAGCATCAAACCA	59.854	21	CAACCTCTCTGCCTGTACCA	59.023	20	167	Glycerolipid metabolism; Glycerophospholipid metabolism	Lipid metabolism
T01-03_TRINITY_DN1208_c0_g1_i3	1	(AG)7cgcttctcacaatgagcttctcacgaactacagggagggaaaaatttgcagatc(AG)8ggaaaaaacgcaaatttctctaaatttcgtgcgtccatagccgtcaaatttgagtcgttcc(CT)8gatctgcaaatttttccctccctgtagttcgtgagaagctcattgtgagaagcg(CT)7	229	AGCGCTTCTCACAATGAGCT	60.037	20	AGCGCTTCTCACAATGAGCT	60.037	20	204	Phenylalanine metabolism; Phenylpropanoid biosynthesis	Amino acid metabolism; Biosynthesis of other secondary metabolites
T01-03_TRINITY_DN12117_c0_g1_i4	1	(A)17	17	ATGCGGTCCCCATACTTGTG	60.107	20	AGAACGACTCAACGCCAAGT	59.896	20	115	Porphyrin metabolism	Metabolism of cofactors and vitamins
T01-03_TRINITY_DN12117_c0_g3_i3	1	(T)17	17	AGAACGACTCAACGCCAAGT	59.896	20	ATGCGGTCCCCATACTTGTG	60.107	20	115	Porphyrin metabolism	Metabolism of cofactors and vitamins
T01-03_TRINITY_DN1218_c0_g1_i1	1	(T)14	14	TGATGCGGTTTTCACACAGT	58.326	20	ACAAACAGTGATGCTCCACAGA	60.159	22	248	Oxidative phosphorylation	Energy metabolism
T01-03_TRINITY_DN1218_c0_g3_i2	1	(A)14	14	ACAAACAGTGATGCTCCACAGA	60.159	22	TGATGCGGTTTTCACACAGT	58.326	20	248	Oxidative phosphorylation	Energy metabolism
T01-03_TRINITY_DN12188_c0_g1_i4	1	(T)10	10	ACGCATGACCAGAGTTTCGT	59.966	20	GGAGAATAATGGTGAGGAGGCT	59.292	22	165	Glycosylphosphatidylinositol (GPI)-anchor biosynthesis	Glycan biosynthesis and metabolism
T01-03_TRINITY_DN12194_c1_g2_i4	1	(G)15	15	TGAGGCACAATAGGGAAGGG	59.081	20	CTCCACAACCCTTCCCACTC	59.963	20	166	Amino sugar and nucleotide sugar metabolism	Carbohydrate metabolism
T01-03_TRINITY_DN12239_c0_g1_i2	1	(ATG)5	15	CCCTCCAAGATCTCGGTGTG	59.823	20	GCCGAAAACGAAGAGCAACA	59.693	20	125	Sesquiterpenoid and triterpenoid biosynthesis	Metabolism of terpenoids and polyketides
T01-03_TRINITY_DN12241_c0_g1_i7	1	(A)14	14	GGGTTGGAAATCCCGTGAAC	59.114	20	GAGGGGAGGAAGTGGGTTTG	59.962	20	170	Pyruvate metabolism; Carbon fixation in photosynthetic organisms	Carbohydrate metabolism; Energy metabolism
T01-03_TRINITY_DN12253_c1_g1_i1	1	(A)13	13	TTTGTCAGCACTCGCCATCT	59.965	20	GCGGCCTCTAATCTCGACAT	59.684	20	133	Other glycan degradation	Glycan biosynthesis and metabolism
T01-03_TRINITY_DN12260_c0_g3_i3	1	(ATT)8	24	GGCCAGAAAACTTCCCTTGC	59.682	20	GTGATCCACGTGGGCAAAAC	60.04	20	143	One carbon pool by folate	Metabolism of cofactors and vitamins
T01-03_TRINITY_DN12273_c0_g1_i1	1	(T)16	16	TTCTTGGTTGCTCAGCTGGT	59.817	20	CCCTCCGAACCAAACTCCAA	59.89	20	260	Oxidative phosphorylation	Energy metabolism
T01-03_TRINITY_DN12363_c0_g1_i44	1	(A)10	10	TCCCAGATTTAGGAGGCCGT	60.326	20	ATCACATGCTGGATCGACCC	59.893	20	206	Oxidative phosphorylation	Energy metabolism
T01-03_TRINITY_DN12363_c0_g1_i44	1	(T)10	10	ACCTTAGGTGGGGTGACACT	60.105	20	ACTTCCATTCACCGTCTCGT	59.033	20	161	Oxidative phosphorylation	Energy metabolism
T01-03_TRINITY_DN12366_c1_g1_i4	1	(A)10	10	CGAGCAAATCAAGCACACCA	59.407	20	ACGAGGGGGTTAGGACTTCT	59.587	20	223	Glycine, serine and threonine metabolism; Valine, leucine and isoleucine degradation; Lysine degradation; Arginine and proline metabolism; Histidine metabolism; Tryptophan metabolism; Glycolysis / Gluconeogenesis; Ascorbate and aldarate metabolism; Pyruvate metabolism; Fatty acid degradation; Glycerolipid metabolism; beta-Alanine metabolism	Amino acid metabolism; Carbohydrate metabolism; Lipid metabolism; Metabolism of other amino acids
T01-03_TRINITY_DN12372_c0_g1_i2	1	(A)11	11	CCTTGTATGCAGGGTTGTCCA	60.272	21	AGTTATGCTTCGTGTGGGTGA	59.654	21	100	Pyruvate metabolism	Carbohydrate metabolism
T01-03_TRINITY_DN12388_c0_g1_i14	1	(T)12	12	CCCATGGTATTGCCGACACA	60.394	20	GCAACATTGAGCCCCACAAA	59.608	20	224	Vitamin B6 metabolism	Metabolism of cofactors and vitamins
T01-03_TRINITY_DN12388_c0_g1_i14	1	(TA)7	14	CAAGCTTCGTTTAGCCGTCC	59.557	20	TGGTGTTCACCCTCATTGTGT	59.786	21	156	Vitamin B6 metabolism	Metabolism of cofactors and vitamins
T01-03_TRINITY_DN12430_c14_g1_i1	1	(T)10	10	GACTTTTTGTAGTCACCACCCA	58.452	22	CAGATCCTAAGAAAAGAGGGAAAACC	59.624	26	153	Porphyrin metabolism	Metabolism of cofactors and vitamins
T01-03_TRINITY_DN12430_c9_g1_i1	1	(T)10	10	TGTCTTTCCTCTCCTCCCCT	59.206	20	TGTGCTCATCACTGGTGCTT	59.891	20	232	Caffeine metabolism; Purine metabolism; Drug metabolism - other enzymes	Biosynthesis of other secondary metabolites; Nucleotide metabolism; Xenobiotics biodegradation and metabolism
T01-03_TRINITY_DN1247_c0_g1_i2	1	(T)13	13	AAGCCCCATTGAGGAAGACG	60.035	20	TCGAGATGCAAGGAGAGGGA	60.033	20	268	Starch and sucrose metabolism	Carbohydrate metabolism
T01-03_TRINITY_DN12520_c0_g1_i2	1	(T)12	12	ACTCAAGCGACTAGTTCACCT	58.76	21	TTTTTCCATGTGATGTTAACAGGT	57.277	24	272	Amino sugar and nucleotide sugar metabolism	Carbohydrate metabolism
T01-03_TRINITY_DN12553_c0_g1_i1	1	(T)11	11	TGCATGCCTATTGGTCTGTT	57.487	20	AGCTCACCAATTGGCACTTG	59.036	20	177	Ascorbate and aldarate metabolism; Glutathione metabolism	Carbohydrate metabolism; Metabolism of other amino acids
T01-03_TRINITY_DN12580_c0_g1_i3	1	(TC)6	12	TGCACTCATTGTTCGATGGC	59.196	20	CAACTACTCCATTGGGCCGT	60.035	20	176	Purine metabolism	Nucleotide metabolism
T01-03_TRINITY_DN12582_c0_g1_i2	1	(A)11	11	GGTTGATAGCAAGGCATCCCT	60.134	21	TATGGGCCCTGCATCCTTTC	59.814	20	239	Fructose and mannose metabolism; Starch and sucrose metabolism; Purine metabolism	Carbohydrate metabolism; Nucleotide metabolism
T01-03_TRINITY_DN12582_c0_g1_i2	1	(T)11	11	TATGGGCCCTGCATCCTTTC	59.814	20	GGTTGATAGCAAGGCATCCCT	60.134	21	239	Fructose and mannose metabolism; Starch and sucrose metabolism; Purine metabolism	Carbohydrate metabolism; Nucleotide metabolism
T01-03_TRINITY_DN12704_c0_g1_i1	1	(A)10	10	TCCAGTAGTTGTGCTCCTGT	58.283	20	ACAACAACAACCACCCATTGC	60.135	21	254	Alanine, aspartate and glutamate metabolism; Nitrogen metabolism	Amino acid metabolism; Energy metabolism
T01-03_TRINITY_DN12704_c0_g1_i1	2	(GTT)5	15	TCCAGTAGTTGTGCTCCTGT	58.283	20	ACAACAACAACCACCCATTGC	60.135	21	254	Alanine, aspartate and glutamate metabolism; Nitrogen metabolism	Amino acid metabolism; Energy metabolism
T01-03_TRINITY_DN12710_c1_g1_i5	1	(AG)18	36	CTCGTTTCTCCCTCTTGCGT	60.038	20	CTCGGTCTGACTCTTCCGTG	59.831	20	157	Zeatin biosynthesis	Metabolism of terpenoids and polyketides
T01-03_TRINITY_DN1282_c2_g1_i3	1	(A)14ggaggattggaagattgattggtagttgttgttgggtttggctttggagaggaaggacaaagtggtcattacattgttagatgtaaactggatctggt(A)10	122	TGGAATCTCCCAAATCCCCG	59.449	20	TCCTCTCCAAAGCCAAACCC	59.888	20	110	Ascorbate and aldarate metabolism; Inositol phosphate metabolism	Carbohydrate metabolism
T01-03_TRINITY_DN12995_c0_g1_i1	1	(T)13	13	TCCAATCAACTGCTCTTTTGGG	59.107	22	CACTTTATCACTGGGGGCCA	59.669	20	229	Glyoxylate and dicarboxylate metabolism; Carbon fixation in photosynthetic organisms	Carbohydrate metabolism; Energy metabolism
T01-03_TRINITY_DN12995_c0_g1_i1	1	(A)16	16	AGGTTAGCATACCTGAGACCCT	60.023	22	CCCCAAACCAGTGCCATCAT	60.616	20	101	Glyoxylate and dicarboxylate metabolism; Carbon fixation in photosynthetic organisms	Carbohydrate metabolism; Energy metabolism
T01-03_TRINITY_DN13015_c1_g1_i3	1	(ATA)10	30	AAAGAAATTAGAAGTTTACTGGAAGGT	57.358	27	TGCCCTAAGAAATTTGATTTTTAACAA	57.162	27	107	N-Glycan biosynthesis; Various types of N-glycan biosynthesis	Glycan biosynthesis and metabolism
T01-03_TRINITY_DN1303_c0_g1_i6	1	(GAC)5	15	AAGAAGACGACGACGACGAC	60.111	20	ATCATCCCGGTGCTTGAGTG	60.108	20	111	Starch and sucrose metabolism	Carbohydrate metabolism
T01-03_TRINITY_DN13037_c0_g1_i3	1	(AGA)6	18	GGTTGCTCTCTCTTGTGGCT	59.964	20	TCACCAAGGGAGGAGAGGTT	59.806	20	109	Phenylpropanoid biosynthesis	Biosynthesis of other secondary metabolites
T01-03_TRINITY_DN1305_c2_g1_i1	1	(T)11	11	GCAGCCTTTCAACATGTGGG	60.038	20	GGCACCTTCTATCGTGAAGC	58.709	20	101	Fructose and mannose metabolism	Carbohydrate metabolism
T01-03_TRINITY_DN13066_c0_g1_i3	1	(TC)10	20	TGGTGTGGTTCTTTTCTGGCT	60.064	21	CAATTCCACTCTGCCCTCGT	60.036	20	122	Inositol phosphate metabolism	Carbohydrate metabolism
T01-03_TRINITY_DN13123_c0_g1_i3	1	(T)10	10	AGAAGTTTTGATGCACGGTAGT	58.26	22	CCCTAACACATCCACCTCCC	59.453	20	202	Steroid hormone biosynthesis	Lipid metabolism
T01-03_TRINITY_DN1317_c0_g1_i2	1	(TCT)6	18	CAACCTCCTCAGCAGTCCAA	59.602	20	TGAGACGACGGACATAGGAGA	59.791	21	218	Glutathione metabolism; Purine metabolism; Pyrimidine metabolism; Drug metabolism - other enzymes	Metabolism of other amino acids; Nucleotide metabolism; Xenobiotics biodegradation and metabolism
T01-03_TRINITY_DN1317_c0_g1_i2	1	(GAA)6	18	TGAGACGACGGACATAGGAGA	59.791	21	CAACCTCCTCAGCAGTCCAA	59.602	20	218	Glutathione metabolism; Purine metabolism; Pyrimidine metabolism; Drug metabolism - other enzymes	Metabolism of other amino acids; Nucleotide metabolism; Xenobiotics biodegradation and metabolism
T01-03_TRINITY_DN13188_c0_g1_i2	1	(ACA)5gcaccaccaccatcatcaacaacaacaacagcaacaacatcaccaccat(CAA)6	82	TCGTCTTCTGTTGCTCCACC	59.966	20	TTTCATGGCGACGAACCTCA	59.966	20	241	Porphyrin metabolism	Metabolism of cofactors and vitamins
T01-03_TRINITY_DN13189_c1_g1_i1	1	(T)11	11	ACTGATGGGAAGGGTTAGGAC	58.803	21	TGAGAGGCTGATACCATACCCA	60.091	22	263	N-Glycan biosynthesis; Various types of N-glycan biosynthesis	Glycan biosynthesis and metabolism
T01-03_TRINITY_DN13189_c1_g1_i1	1	(A)10	10	AGTGCCCATGCCTAAGTTCC	60.034	20	TGGCTCAGATAGGGTTCACTG	59.166	21	256	N-Glycan biosynthesis; Various types of N-glycan biosynthesis	Glycan biosynthesis and metabolism
T01-03_TRINITY_DN13189_c1_g1_i1	1	(A)11	11	ACATCATCTCTGAATGGCCCC	59.855	21	TATGGGTTCAAGGGGGCTTG	59.665	20	106	N-Glycan biosynthesis; Various types of N-glycan biosynthesis	Glycan biosynthesis and metabolism
T01-03_TRINITY_DN13193_c0_g1_i1	1	(A)10	10	AGGCACATAAACCTCCCTTTCA	59.621	22	TGATCAGCTGAAAAAGGGGGA	59.29	21	210	Photosynthesis	Energy metabolism
T01-03_TRINITY_DN1320_c1_g3_i5	1	(A)14	14	ACGTTTCTCCCTTTTCCCAA	57.259	20	CCTTTTCCTCTGACTCCGGG	59.749	20	111	Cysteine and methionine metabolism; Sulfur metabolism	Amino acid metabolism; Energy metabolism
T01-03_TRINITY_DN1320_c1_g3_i5	2	(A)10	10	ACGTTTCTCCCTTTTCCCAA	57.259	20	CCTTTTCCTCTGACTCCGGG	59.749	20	111	Cysteine and methionine metabolism; Sulfur metabolism	Amino acid metabolism; Energy metabolism
T01-03_TRINITY_DN1320_c1_g3_i5	1	(A)14	14	CCCGGAGTCAGAGGAAAAGG	59.749	20	GTGAGCTTGGGACCTGTTGT	60.179	20	181	Cysteine and methionine metabolism; Sulfur metabolism	Amino acid metabolism; Energy metabolism
T01-03_TRINITY_DN1320_c1_g3_i5	2	(A)10	10	CCCGGAGTCAGAGGAAAAGG	59.749	20	GTGAGCTTGGGACCTGTTGT	60.179	20	181	Cysteine and methionine metabolism; Sulfur metabolism	Amino acid metabolism; Energy metabolism
T01-03_TRINITY_DN13246_c0_g1_i1	1	(A)12	12	TGGTCTGACCACTCAATCACA	58.954	21	ACCACCACTTCTTCTACCCCT	60.132	21	124	Lipoic acid metabolism	Metabolism of cofactors and vitamins
T01-03_TRINITY_DN13257_c0_g1_i2	1	(T)10	10	TCCCATCCTCAACCCCAATT	58.608	20	AGCACGAATGATCCAGAGGG	59.533	20	158	Terpenoid backbone biosynthesis	Metabolism of terpenoids and polyketides
T01-03_TRINITY_DN13257_c0_g1_i2	1	(A)12	12	TGGATCAGCAGTGCTTTCATCT	60.027	22	GCTCCTTCAGGTATGCAATGC	59.664	21	179	Terpenoid backbone biosynthesis	Metabolism of terpenoids and polyketides
T01-03_TRINITY_DN1326_c2_g1_i4	1	(A)21	21	TTAGCACTGGTGTCCTCTGC	59.678	20	AGCCGCAGCCTATTATGCAA	60.179	20	114	Pentose and glucuronate interconversions	Carbohydrate metabolism
T01-03_TRINITY_DN1326_c2_g1_i4	1	(T)21	21	AGCCGCAGCCTATTATGCAA	60.179	20	TTAGCACTGGTGTCCTCTGC	59.678	20	114	Pentose and glucuronate interconversions	Carbohydrate metabolism
T01-03_TRINITY_DN13294_c0_g1_i14	1	(A)9(ATAATAATAATAATAATAATAATAATAATAAATCAAGAGTTCCAACGGTCGGATTTCCCAGGCCAACCGCCGGGAGAAAAGAATTTCTTCCGACAGAGGCCAGAGAGAGAGGGGTGGAAGAAGAAGAAGGAAGCGTTGGAGAGGAGATACGTGGCTTGTCTGAGCTGTCGAAGAGCTT<AA>T)(AAT)9	38	CAAGAGTTCCAACGGTCGGA	59.967	20	CAGCTCAGACAAGCCACGTA	60.038	20	133	Glycerolipid metabolism	Lipid metabolism
T01-03_TRINITY_DN13294_c0_g1_i14	1	(TTA)8(T)10	34	CCGACCGTTGGAACTCTTGA	59.967	20	TCGATCTTCTTGGCGACACC	60.109	20	131	Glycerolipid metabolism	Lipid metabolism
T01-03_TRINITY_DN13294_c5_g1_i1	1	(TTA)7tcaa(T)15	40	TTGCTGGTGGGACTGGATTG	60.251	20	GGGAGTTCACCTTGATTGTGC	59.458	21	196	Zeatin biosynthesis	Metabolism of terpenoids and polyketides
T01-03_TRINITY_DN13347_c0_g1_i12	1	(T)14	14	TCCTTGCGAAGTGCCTTGAT	59.963	20	GCATTAAGCACTTGGCAGAACCAT	62.414	24	147	Oxidative phosphorylation	Energy metabolism
T01-03_TRINITY_DN13347_c0_g1_i12	2	(T)10	10	TCCTTGCGAAGTGCCTTGAT	59.963	20	GCATTAAGCACTTGGCAGAACCAT	62.414	24	147	Oxidative phosphorylation	Energy metabolism
T01-03_TRINITY_DN13347_c0_g1_i12	1	(T)14	14	TCCTTGCGAAGTGCCTTGAT	59.963	20	AACCGACACGCAATTTCACA	58.982	20	279	Oxidative phosphorylation	Energy metabolism
T01-03_TRINITY_DN13347_c0_g1_i12	2	(T)10	10	TCCTTGCGAAGTGCCTTGAT	59.963	20	AACCGACACGCAATTTCACA	58.982	20	279	Oxidative phosphorylation	Energy metabolism
T01-03_TRINITY_DN1336_c2_g1_i2	1	(TC)11	22	GTGACGATTCACGGAAAAACGA	59.781	22	AGGAACGGTGCCATCATTGT	59.962	20	229	Inositol phosphate metabolism	Carbohydrate metabolism
T01-03_TRINITY_DN13483_c0_g1_i7	1	(T)10	10	CCTCCACTTTGAGAGTTCTGGA	59.365	22	AAATGGCACCAACACAGCTG	59.61	20	110	Glycerophospholipid metabolism; Ether lipid metabolism	Lipid metabolism
T01-03_TRINITY_DN13491_c0_g1_i1	1	(A)11	11	TCCACAAACCCCAACACACA	59.96	20	TCCCCTTTTTCAGTCCGGTG	59.89	20	111	Fructose and mannose metabolism	Carbohydrate metabolism
T01-03_TRINITY_DN13577_c0_g1_i1	1	(T)11	11	TGCTTAATGTTCTTGGCTTCTTGT	59.416	24	TCACAAATTTGCAGAGAACCCA	58.705	22	223	Glycolysis / Gluconeogenesis; Pyruvate metabolism; Purine metabolism	Carbohydrate metabolism; Nucleotide metabolism
T01-03_TRINITY_DN13577_c0_g1_i1	1	(A)11	11	TCTTCTGCTAGGGGAGAATGC	59.235	21	TGGATCACACAATTTTTGCACCA	59.866	23	104	Glycolysis / Gluconeogenesis; Pyruvate metabolism; Purine metabolism	Carbohydrate metabolism; Nucleotide metabolism
T01-03_TRINITY_DN13577_c0_g1_i1	1	(T)11	11	TGGTTATTCGCTTGGAGGTGT	59.65	21	CTGTCGGGCCTAAGAACCAT	59.458	20	190	Glycolysis / Gluconeogenesis; Pyruvate metabolism; Purine metabolism	Carbohydrate metabolism; Nucleotide metabolism
T01-03_TRINITY_DN13588_c0_g1_i1	1	(A)10	10	GAGATGGTTCTGCCTCGTCG	60.527	20	CCGGTCGCGAGATCTGAATA	59.408	20	115	Photosynthesis	Energy metabolism
T01-03_TRINITY_DN13588_c0_g1_i1	1	(G)10	10	CCGCTTGAGCTGTACGAGAT	59.899	20	TGCAATCGCCTGAATCTCGA	59.824	20	125	Photosynthesis	Energy metabolism
T01-03_TRINITY_DN13624_c0_g1_i1	1	(A)10	10	AGCATCCACCAAAACCATGT	57.986	20	TGGAAGGGTTTTATGATTGTTGCT	59.162	24	179	Lipoic acid metabolism	Metabolism of cofactors and vitamins
T01-03_TRINITY_DN13624_c0_g1_i1	1	(T)13	13	CGTAGCCCTAGTACCCACCT	60.106	20	TGGTTTATTGGGCCCTTGGA	59.213	20	179	Lipoic acid metabolism	Metabolism of cofactors and vitamins
T01-03_TRINITY_DN1364_c4_g1_i1	1	(A)10	10	TCAAGCCTGTAAATCTCCCCT	58.438	21	TTCCAACCAACAAAGGGCCT	60.032	20	110	Steroid hormone biosynthesis	Lipid metabolism
T01-03_TRINITY_DN13653_c0_g1_i6	1	(A)10	10	CCACCCAATCTCTTTTTCCCAC	59.437	22	AGTGTCTTGTGAGGATGGCA	58.941	20	134	Valine, leucine and isoleucine degradation; Lysine degradation; Arginine and proline metabolism; Histidine metabolism; Tryptophan metabolism; Glycolysis / Gluconeogenesis; Ascorbate and aldarate metabolism; Pyruvate metabolism; Fatty acid degradation; Glycerolipid metabolism; beta-Alanine metabolism; Limonene and pinene degradation; Insect hormone biosynthesis; Chloroalkane and chloroalkene degra…	Amino acid metabolism; Carbohydrate metabolism; Lipid metabolism; Metabolism of other amino acids; Metabolism of terpenoids and polyketides; Xenobiotics biodegradation and metabolism
T01-03_TRINITY_DN13697_c0_g1_i6	1	(AC)8	16	ACCACCACACGCTTCAATCT	59.891	20	CTGCACCTTGTCCCTGATGT	59.963	20	117	Prodigiosin biosynthesis; Fatty acid biosynthesis; Biosynthesis of unsaturated fatty acids; Biotin metabolism	Biosynthesis of other secondary metabolites; Lipid metabolism; Metabolism of cofactors and vitamins
T01-03_TRINITY_DN13712_c0_g1_i1	1	(A)11	11	GGAGGAGTACATGAGGGTGG	58.876	20	TGTTGGAGAAGTGGAGTACAGT	58.694	22	211	Purine metabolism; Pyrimidine metabolism	Nucleotide metabolism
T01-03_TRINITY_DN13750_c0_g3_i4	1	(A)10	10	TCGGTGTGGATTCATTTTAGAAACC	59.818	25	CTCCTTGGGTCATAGCAGGC	60.179	20	188	Photosynthesis	Energy metabolism
T01-03_TRINITY_DN1376_c2_g1_i1	1	(CT)14	28	GGCCCGAGATGAGATGAAGG	59.965	20	AAAACGCGAAGAGGAGAGGG	60.037	20	273	alpha-Linolenic acid metabolism	Lipid metabolism
T01-03_TRINITY_DN13893_c0_g1_i1	1	(T)11	11	GGACATGAATCCACTTGCAACT	59.178	22	AGCTTGCTCACTTGACTCTGA	59.309	21	146	Starch and sucrose metabolism	Carbohydrate metabolism
T01-03_TRINITY_DN13896_c0_g1_i1	1	(T)10	10	GGCATTGAGTTCACCGAACC	59.478	20	AACCAGTTTGTCCGGGTAGG	59.601	20	273	Glycine, serine and threonine metabolism; Methane metabolism	Amino acid metabolism; Energy metabolism
T01-03_TRINITY_DN1396_c0_g1_i6	1	(T)15	15	CATGAAGGCCAATCCGATGC	59.687	20	ACACGTTATGGTTGTAGCTCCT	59.434	22	251	Cysteine and methionine metabolism; Sulfur metabolism	Amino acid metabolism; Energy metabolism
T01-03_TRINITY_DN1396_c0_g3_i8	1	(GCT)5	15	ATATCATCTGGGGCTGCTGC	59.962	20	TCTACCTCCTGCTTCACGGA	59.961	20	145	Cysteine and methionine metabolism; Sulfur metabolism	Amino acid metabolism; Energy metabolism
T01-03_TRINITY_DN13968_c1_g1_i3	1	(TCT)5	15	CCCAAATCATCCCCACCACA	59.959	20	GGACCACCACCTATAACGGC	60.179	20	106	Porphyrin metabolism; Terpenoid backbone biosynthesis	Metabolism of cofactors and vitamins; Metabolism of terpenoids and polyketides
T01-03_TRINITY_DN13968_c1_g1_i3	1	(TCC)5	15	CACGCATCTCGAGGTACCTC	59.97	20	TACTGTTGGCTCCATCTGCG	60.108	20	130	Porphyrin metabolism; Terpenoid backbone biosynthesis	Metabolism of cofactors and vitamins; Metabolism of terpenoids and polyketides
T01-03_TRINITY_DN13968_c1_g1_i3	1	(AG)14	28	GTGGTGAGTACGTTGGGGAG	60.038	20	GAGATGACTCGGCTGAGACG	59.971	20	223	Porphyrin metabolism; Terpenoid backbone biosynthesis	Metabolism of cofactors and vitamins; Metabolism of terpenoids and polyketides
T01-03_TRINITY_DN13968_c1_g1_i3	1	(AG)8	16	CGCCCAGAGAGAGAGAGAGA	59.82	20	GAGATGACTCGGCTGAGACG	59.971	20	146	Porphyrin metabolism; Terpenoid backbone biosynthesis	Metabolism of cofactors and vitamins; Metabolism of terpenoids and polyketides
T01-03_TRINITY_DN1405_c0_g1_i3	1	(TC)11	22	TCCACCCAAACCCCAAATGT	59.734	20	GAAGTGGCAAGTGTTCGCAG	60.041	20	253	Inositol phosphate metabolism	Carbohydrate metabolism
T01-03_TRINITY_DN14072_c0_g1_i2	1	(GA)6c(AG)7	27	GGCCCCAACCTCCTTTACTT	59.592	20	CGAACAGAAAATTCCCGCCG	60.179	20	171	Arginine and proline metabolism	Amino acid metabolism
T01-03_TRINITY_DN14073_c0_g1_i1	1	(T)13	13	TCTGAGCATATGACTTTCAGCTGT	60.081	24	TGGCCAAATAAGGTGGACTCA	59.292	21	278	Phenylpropanoid biosynthesis	Biosynthesis of other secondary metabolites
T01-03_TRINITY_DN14076_c0_g1_i1	1	(A)12	12	GCAAGCCTGAGCATGACTTG	59.829	20	TGTTTCTGCCAAGACATCTCGA	59.963	22	219	Glycolysis / Gluconeogenesis; Pentose phosphate pathway; Starch and sucrose metabolism; Amino sugar and nucleotide sugar metabolism	Carbohydrate metabolism
T01-03_TRINITY_DN14079_c1_g2_i1	1	(TC)10	20	TGATCTCGAGTGCTTCCTCA	58.161	20	AATGTGTGGGTGATGTGGCA	60.179	20	224	Carotenoid biosynthesis	Metabolism of terpenoids and polyketides
T01-03_TRINITY_DN1409_c0_g1_i24	1	(A)10	10	ACAAGCACCTTGACGAAAAGA	58.361	21	TGGTCAGTAATCACACCCTCA	58.385	21	222	Inositol phosphate metabolism	Carbohydrate metabolism
T01-03_TRINITY_DN14118_c0_g1_i1	1	(AG)17	34	GGGTGAGCAATGGAGAGTGG	60.394	20	TCAGTCCTCTTAGCTTTGCCC	59.721	21	161	Glycosaminoglycan degradation	Glycan biosynthesis and metabolism
T01-03_TRINITY_DN1417_c0_g2_i1	1	(GAA)7	21	AGGGCATTCGGTGTGTTTGA	60.179	20	CGCCTTGATTCCAGACTCGT	60.109	20	107	Glycine, serine and threonine metabolism; Glyoxylate and dicarboxylate metabolism; Methane metabolism; One carbon pool by folate; Cyanoamino acid metabolism	Amino acid metabolism; Carbohydrate metabolism; Energy metabolism; Metabolism of cofactors and vitamins; Metabolism of other amino acids
T01-03_TRINITY_DN14204_c0_g1_i1	1	(CT)9	18	AATTGGGGGTTTTGCATGGC	59.962	20	TGTTGCCTTGGCAAGAGAGA	59.526	20	170	Taurine and hypotaurine metabolism	Metabolism of other amino acids
T01-03_TRINITY_DN14204_c0_g1_i1	1	(T)10	10	TGGTCTTTTCATGTTTGGAATCACA	59.638	25	ACACTCAAAAGTTTCAACCACAA	57.539	23	106	Taurine and hypotaurine metabolism	Metabolism of other amino acids
T01-03_TRINITY_DN1422_c0_g1_i1	1	(T)10	10	GTCATGCAGGAGAGTGAGGT	59.099	20	TTCAGTGGGAATGGGGGAGA	60.179	20	230	Fructose and mannose metabolism	Carbohydrate metabolism
T01-03_TRINITY_DN1422_c0_g1_i1	1	(A)20	20	GGGTGATCCATGGACAGGTC	59.819	20	TGACCTTCAGAAACCACCACA	59.438	21	196	Fructose and mannose metabolism	Carbohydrate metabolism
T01-03_TRINITY_DN14279_c0_g1_i5	1	(A)10	10	GGTAGGCAACCCACTTCAGG	60.323	20	GCTCATTGGTGATGATGTGCA	59.253	21	126	Purine metabolism; Pyrimidine metabolism	Nucleotide metabolism
T01-03_TRINITY_DN14279_c0_g1_i5	1	(CT)6	12	TATGAAGCAGCCTGCCAACA	59.962	20	AGAGCATGGTGGTTAAGTGGT	59.295	21	148	Purine metabolism; Pyrimidine metabolism	Nucleotide metabolism
T01-03_TRINITY_DN1429_c0_g1_i20	1	(A)10	10	TACGGAGACACAAATGGGCC	60.036	20	CCTTTGAGGCTGTGGGGAAA	60.179	20	158	Valine, leucine and isoleucine biosynthesis; Glucosinolate biosynthesis; C5-Branched dibasic acid metabolism	Amino acid metabolism; Biosynthesis of other secondary metabolites; Carbohydrate metabolism
T01-03_TRINITY_DN14333_c0_g1_i9	1	(T)11gttgagaagttcaattatacatcttcatcttccttcttcatgtg(TA)6	67	ACAAACCAAGAGCGAACCCA	60.107	20	GGTTCGTCACTTCCATCGGT	60.038	20	236	Pyruvate metabolism	Carbohydrate metabolism
T01-03_TRINITY_DN14338_c0_g2_i2	1	(T)12actttaatgttctctgtaaaagtgggtgtatgtgaaagaaagaaatatac(AG)8	78	AGTGGTGTTAGGGAAGCTGA	58.27	20	TCCCTCTCTCTCTCTCTCTGT	58.154	21	210	Arginine and proline metabolism; beta-Alanine metabolism	Amino acid metabolism; Metabolism of other amino acids
T01-03_TRINITY_DN14341_c0_g1_i2	1	(T)10	10	TCTTGATCATCAGTGGGTACGA	58.638	22	TCTTGTTGGAACATATTCGATACTCA	58.448	26	184	Glycosaminoglycan biosynthesis - chondroitin sulfate / dermatan sulfate; Glycosaminoglycan biosynthesis - heparan sulfate / heparin	Glycan biosynthesis and metabolism
T01-03_TRINITY_DN1435_c1_g1_i1	1	(TC)7	14	CCGATAAGTTACCCGTGCCA	59.824	20	TCCAGTTGCACCAGTGACAA	59.746	20	115	Cutin, suberine and wax biosynthesis	Lipid metabolism
T01-03_TRINITY_DN14369_c0_g1_i54	1	(A)11	11	TGATGATGCCTGTGTCCCTT	59.006	20	GGGAAGATGCTCTTGGATCCC	60.203	21	216	Valine, leucine and isoleucine degradation	Amino acid metabolism
T01-03_TRINITY_DN1438_c0_g1_i11	1	(AAT)5	15	ATTCTTCAATACACGCGCGC	59.974	20	AGCCGACTTGATTTGAGCGA	60.037	20	99	Amino sugar and nucleotide sugar metabolism	Carbohydrate metabolism
T01-03_TRINITY_DN1438_c0_g2_i6	1	(TC)9	18	AAAACGAGGGGAACGAGCAT	59.964	20	CGTGTGTGACTGAGAGCGTA	59.763	20	190	Amino sugar and nucleotide sugar metabolism	Carbohydrate metabolism
T01-03_TRINITY_DN1441_c0_g1_i2	1	(TC)8	16	CGCGACTTGTAGAAGACGGT	60.11	20	GACTCGCCTCCTGCATACTC	59.969	20	112	Arachidonic acid metabolism	Lipid metabolism
T01-03_TRINITY_DN14416_c0_g1_i2	1	(AT)7	14	TTGGGTCAAAGGTGTGGCTT	60.033	20	GCGTTTACCCTTTCAAGCCC	59.757	20	133	N-Glycan biosynthesis; Various types of N-glycan biosynthesis	Glycan biosynthesis and metabolism
T01-03_TRINITY_DN14416_c0_g1_i2	2	(AT)7	14	TTGGGTCAAAGGTGTGGCTT	60.033	20	GCGTTTACCCTTTCAAGCCC	59.757	20	133	N-Glycan biosynthesis; Various types of N-glycan biosynthesis	Glycan biosynthesis and metabolism
T01-03_TRINITY_DN14416_c0_g1_i2	1	(AT)7	14	TTGGGTCAAAGGTGTGGCTT	60.033	20	GCGTTTACCCTTTCAAGCCC	59.757	20	133	N-Glycan biosynthesis; Various types of N-glycan biosynthesis	Glycan biosynthesis and metabolism
T01-03_TRINITY_DN14416_c0_g1_i2	2	(AT)7	14	TTGGGTCAAAGGTGTGGCTT	60.033	20	GCGTTTACCCTTTCAAGCCC	59.757	20	133	N-Glycan biosynthesis; Various types of N-glycan biosynthesis	Glycan biosynthesis and metabolism
T01-03_TRINITY_DN14416_c0_g1_i2	1	(AG)8	16	TGGGGGAGAGATTTGTGGGA	60.179	20	CAGCAACAGCCAGCAAGTAC	59.761	20	100	N-Glycan biosynthesis; Various types of N-glycan biosynthesis	Glycan biosynthesis and metabolism
T01-03_TRINITY_DN1445_c0_g1_i9	1	(TAT)5	15	GAGAACATGGCTTCGCATGC	60.248	20	AGGGTGAGGGCATTTTTGGA	59.513	20	239	Cysteine and methionine metabolism; Arginine and proline metabolism; beta-Alanine metabolism; Glutathione metabolism	Amino acid metabolism; Metabolism of other amino acids
T01-03_TRINITY_DN1453_c1_g1_i12	1	(T)13gtgggc(G)10	29	GAAGACCACTGATTCCGGCA	60.036	20	CCGGCCGACAATAGTGATGA	59.896	20	208	Drug metabolism - cytochrome P450	Xenobiotics biodegradation and metabolism
T01-03_TRINITY_DN1453_c1_g1_i12	1	(T)12	12	ACCTTCATCGCTCTGATCCA	58.511	20	TAGCGAGGATGCTCGTGATG	59.688	20	108	Drug metabolism - cytochrome P450	Xenobiotics biodegradation and metabolism
T01-03_TRINITY_DN1453_c1_g1_i12	1	(A)11	11	ACGACCAATCAATGTCCGTTG	59.196	21	TCGAGAAAAATTCAACGGACATTGA	59.762	25	125	Drug metabolism - cytochrome P450	Xenobiotics biodegradation and metabolism
T01-03_TRINITY_DN14554_c1_g1_i2	1	(A)10	10	TGGTGGGTGTCAAAGTCTACC	59.581	21	TAGTAGCGGTGGTGGTGGTA	59.961	20	108	N-Glycan biosynthesis; Various types of N-glycan biosynthesis	Glycan biosynthesis and metabolism
T01-03_TRINITY_DN14554_c1_g1_i2	1	(T)10	10	TACCACCACCACCGCTACTA	59.961	20	GGGGTGAGCTAGTGAATGCT	59.456	20	267	N-Glycan biosynthesis; Various types of N-glycan biosynthesis	Glycan biosynthesis and metabolism
T01-03_TRINITY_DN14566_c0_g1_i8	1	(TC)9	18	AAGTGCAAGCCCCATTAGCT	59.96	20	CCACTCACACTCTCCTCTGC	59.754	20	219	Sesquiterpenoid and triterpenoid biosynthesis	Metabolism of terpenoids and polyketides
T01-03_TRINITY_DN14701_c0_g1_i9	1	(A)13	13	ACCTCCTCTCATCCTCACCC	60.032	20	ATCTTTCCTCGTCGAACCCG	59.827	20	155	Inositol phosphate metabolism	Carbohydrate metabolism
T01-03_TRINITY_DN14701_c0_g1_i9	1	(A)10	10	CATCCCAATCCCCCAAACCA	59.958	20	GAGATTTGGGTTTGGTTGGGC	59.998	21	165	Inositol phosphate metabolism	Carbohydrate metabolism
T01-03_TRINITY_DN1480_c0_g1_i13	1	(A)12tagagtgtgaaatgtggagggtttttggtaaaagaagaagaagataaaggtgtggaggg(GA)7	85	TGCGTAAGAACCGATTGGGA	59.391	20	TCAGAAACCCTGAGGCGAAC	59.965	20	272	Oxidative phosphorylation	Energy metabolism
T01-03_TRINITY_DN1481_c0_g1_i6	1	(ATC)5	15	AGGGTTCGGTCTACCAGTCA	59.886	20	TGGAGGAAAGACGGTGGAGA	60.179	20	174	Steroid hormone biosynthesis; Brassinosteroid biosynthesis	Lipid metabolism; Metabolism of terpenoids and polyketides
T01-03_TRINITY_DN1487_c0_g1_i8	1	(A)10	10	TGGCTTCAAGCAAACAAAGAGG	59.899	22	GGTCGGTCTCAGTTGCAGAT	59.752	20	262	Lysine degradation	Amino acid metabolism
T01-03_TRINITY_DN1494_c0_g1_i3	1	(A)12	12	TCTGGTGTCATGGTCCAATGT	59.295	21	CGGGATGCAAATCAAGCCAA	59.468	20	259	Purine metabolism; Pyrimidine metabolism	Nucleotide metabolism
T01-03_TRINITY_DN15035_c0_g1_i19	1	(T)12	12	CCATGGATCCAAAACCACGC	59.827	20	CCTCCCTATGTGGTGGCATT	59.447	20	188	Glycolysis / Gluconeogenesis; Pentose phosphate pathway; Fructose and mannose metabolism; Galactose metabolism; Methane metabolism	Carbohydrate metabolism; Energy metabolism
T01-03_TRINITY_DN15083_c0_g1_i1	1	(CA)6ctaaaaagaaatat(A)11	37	ACCCACTACACACACAGCAC	60.179	20	AGGGCTTGTTTCGATCACCA	59.6	20	204	Riboflavin metabolism	Metabolism of cofactors and vitamins
T01-03_TRINITY_DN15127_c0_g4_i1	1	(CA)10	20	CATGCACACACACACACACA	59.549	20	GGCAATTGCATAGTGGCAGT	59.18	20	133	Citrate cycle (TCA cycle); Carbon fixation pathways in prokaryotes	Carbohydrate metabolism; Energy metabolism
T01-03_TRINITY_DN15280_c0_g1_i1	1	(TTC)8	24	CGGTTGCTCCCATCTGTTCT	60.036	20	CCCATTTCCGGGTGTATGGT	59.742	20	239	Other types of O-glycan biosynthesis	Glycan biosynthesis and metabolism
T01-03_TRINITY_DN15280_c0_g1_i1	1	(AAG)6	18	CGAGATGAGGAAGCACTGGA	59.18	20	TCAGCCAATTCCACCATAGCA	59.716	21	190	Other types of O-glycan biosynthesis	Glycan biosynthesis and metabolism
T01-03_TRINITY_DN1544_c0_g1_i6	1	(AGG)5	15	ATGGGAAGCTTAGGAGGGGT	59.954	20	TTGCTTCTCGTCCTCCTCCT	60.252	20	100	Steroid hormone biosynthesis; Cyanoamino acid metabolism	Lipid metabolism; Metabolism of other amino acids
T01-03_TRINITY_DN15457_c0_g2_i2	1	(A)11	11	CGAGTTCTCCTTGCCCGAAA	60.32	20	TGCCCTTTTGTGTGGTCTCA	59.743	20	175	Thiamine metabolism	Metabolism of cofactors and vitamins
T01-03_TRINITY_DN15483_c0_g1_i3	1	(T)10	10	TGCTTCGCCAGTCGTAACTT	59.967	20	TGCATGGATGAACTTTGAGGC	59.179	21	278	Purine metabolism	Nucleotide metabolism
T01-03_TRINITY_DN15492_c0_g1_i3	1	(A)10	10	CCCAAACAACAGACTTGAACAGG	60.181	23	CGCGACTTACTGGATGCTGT	60.459	20	212	Tyrosine metabolism; Phenylalanine metabolism; Tryptophan metabolism; Indole alkaloid biosynthesis; Isoquinoline alkaloid biosynthesis; Betalain biosynthesis	Amino acid metabolism; Biosynthesis of other secondary metabolites
T01-03_TRINITY_DN15610_c0_g1_i1	1	(T)11	11	CCTGCCCGATCGATCAATCA	59.966	20	TCGGTAGGGGTAGGGACAAC	60.325	20	217	Pentose and glucuronate interconversions	Carbohydrate metabolism
T01-03_TRINITY_DN15610_c0_g1_i1	1	(AT)6	12	GTTGTCCCTACCCCTACCGA	60.325	20	ACTGTCTCTCTGTTTCCCCT	57.593	20	264	Pentose and glucuronate interconversions	Carbohydrate metabolism
T01-03_TRINITY_DN15669_c5_g1_i1	1	(A)10	10	CCACAAAATGCAGCCGGTAC	60.109	20	TGTCTTGAAACAGCTGGTGC	58.976	20	258	Arginine and proline metabolism; Phenylalanine metabolism; Tryptophan metabolism; Aminobenzoate degradation; Styrene degradation	Amino acid metabolism; Xenobiotics biodegradation and metabolism
T01-03_TRINITY_DN15674_c0_g1_i1	1	(A)10	10	TGTGACACAAGCAACAGATCT	57.802	21	TGGGTTCGTGATCTGTTTACTGT	59.93	23	207	Pentose and glucuronate interconversions; Ascorbate and aldarate metabolism; Amino sugar and nucleotide sugar metabolism	Carbohydrate metabolism
T01-03_TRINITY_DN15687_c0_g1_i4	1	(T)10	10	TTAGGGAAGGGATGGCTGGT	60.254	20	GTATCACCCATTGCCCCCAA	60.033	20	99	Porphyrin metabolism	Metabolism of cofactors and vitamins
T01-03_TRINITY_DN15853_c0_g2_i1	1	(T)11cttttttatataaaatgttcccttgcttgcttagc(A)10	56	CAACTGGCACTGCAAGCATA	59.117	20	AAGTATGCAAGGGCGAATCC	58.32	20	124	Glycerolipid metabolism; Retinol metabolism	Lipid metabolism; Metabolism of cofactors and vitamins
T01-03_TRINITY_DN15853_c0_g2_i1	1	(A)10caagaagcagtcaaactattcactaatacaaaaaattacaaag(A)12	65	ACCTCGGTGCTAAGAAATGGA	59.093	21	GGCACCACAGCTTCTGTTAT	58.174	20	192	Glycerolipid metabolism; Retinol metabolism	Lipid metabolism; Metabolism of cofactors and vitamins
T01-03_TRINITY_DN15870_c0_g1_i3	1	(TGG)5	15	TGTAATGGTGGTGGTGGTGG	59.889	20	ACAAAAACCCATGCCTTACACC	59.633	22	109	Lysine degradation	Amino acid metabolism
T01-03_TRINITY_DN1600_c0_g1_i3	1	(CTT)5	15	ACCATTCGAATCGTGGGCAA	60.322	20	CGAAGAGCAGCAACAACTCG	59.837	20	106	Purine metabolism; Pyrimidine metabolism	Nucleotide metabolism
T01-03_TRINITY_DN16000_c0_g2_i1	1	(TC)6	12	AAGGAGTACGCGAAAGAGCC	60.109	20	TCGGTGCCTAGAATGCAACA	59.677	20	200	Pyrimidine metabolism	Nucleotide metabolism
T01-03_TRINITY_DN1601_c1_g1_i1	1	(AG)6	12	ACCACAGTTCCGACCACTTC	59.894	20	ATTCGGCTAGTGATGGCTCG	59.967	20	198	Starch and sucrose metabolism	Carbohydrate metabolism
T01-03_TRINITY_DN1601_c1_g1_i1	2	(GCC)5	15	ACCACAGTTCCGACCACTTC	59.894	20	ATTCGGCTAGTGATGGCTCG	59.967	20	198	Starch and sucrose metabolism	Carbohydrate metabolism
T01-03_TRINITY_DN1615_c0_g1_i1	1	(T)11	11	AGTTGCACAAACACACCGTT	59.115	20	GACAGCCTTCCATCAAGCCT	60.035	20	118	Arginine biosynthesis; Alanine, aspartate and glutamate metabolism; Carbon fixation in photosynthetic organisms	Amino acid metabolism; Energy metabolism
T01-03_TRINITY_DN1615_c0_g1_i1	1	(A)11	11	GACAGCCTTCCATCAAGCCT	60.035	20	AGTTGCACAAACACACCGTT	59.115	20	118	Arginine biosynthesis; Alanine, aspartate and glutamate metabolism; Carbon fixation in photosynthetic organisms	Amino acid metabolism; Energy metabolism
T01-03_TRINITY_DN16155_c2_g1_i1	1	(TG)12	24	CGTGTTTCAGGCTTGGGTTG	59.969	20	GCCCAACCCAAGGTAATCCA	59.96	20	266	Sphingolipid metabolism	Lipid metabolism
T01-03_TRINITY_DN16189_c0_g2_i6	1	(CT)9	18	CGTCTTCTTCGTTTCTGCCC	59.209	20	TCGTTTGTGTGAGTCGTCGT	59.901	20	113	Terpenoid backbone biosynthesis	Metabolism of terpenoids and polyketides
T01-03_TRINITY_DN1629_c0_g1_i11	1	(AG)6	12	CCGCCTTAAATCCGAAAAGGG	59.596	21	GATTCGGATCGACGTCACGA	59.973	20	204	Steroid biosynthesis; Glycerolipid metabolism; Glycerophospholipid metabolism; Ether lipid metabolism; Arachidonic acid metabolism; Linoleic acid metabolism; alpha-Linolenic acid metabolism	Lipid metabolism
T01-03_TRINITY_DN1629_c0_g1_i11	2	(GA)9	18	CCGCCTTAAATCCGAAAAGGG	59.596	21	GATTCGGATCGACGTCACGA	59.973	20	204	Steroid biosynthesis; Glycerolipid metabolism; Glycerophospholipid metabolism; Ether lipid metabolism; Arachidonic acid metabolism; Linoleic acid metabolism; alpha-Linolenic acid metabolism	Lipid metabolism
T01-03_TRINITY_DN16447_c3_g1_i1	1	(CAA)6	18	CCTCCCTTCACCCAGCAATT	59.96	20	CCCCAGACTCCACAATGCAT	60.034	20	261	Oxidative phosphorylation	Energy metabolism
T01-03_TRINITY_DN16535_c0_g1_i1	1	(A)11	11	TGTCACTGATCCTGGATCCA	57.747	20	CGTGAGCCTCTAGAGATATGGT	58.583	22	218	N-Glycan biosynthesis; Various types of N-glycan biosynthesis	Glycan biosynthesis and metabolism
T01-03_TRINITY_DN16558_c0_g1_i3	1	(T)10	10	GCGTGGCTTTTTGACGTCTT	59.971	20	CACGGTGGAGTGCACAAAAG	59.971	20	187	Sphingolipid metabolism	Lipid metabolism
T01-03_TRINITY_DN16558_c0_g1_i3	1	(A)12	12	TTACCACTCCAACGCAGGAC	59.966	20	GGCGTCAACAAGCAGAAACC	60.318	20	182	Sphingolipid metabolism	Lipid metabolism
T01-03_TRINITY_DN16558_c0_g1_i3	1	(TC)6	12	GGTTTCTGCTTGTTGACGCC	60.318	20	GAGACAGGCCTGAGAATCCG	59.896	20	128	Sphingolipid metabolism	Lipid metabolism
T01-03_TRINITY_DN16564_c0_g1_i3	1	(ATG)5	15	AGCACACCACCCAAAACTCT	59.741	20	TGAGCTAGCATGGAGAAGGA	57.835	20	278	Fructose and mannose metabolism	Carbohydrate metabolism
T01-03_TRINITY_DN16740_c0_g1_i2	1	(A)10	10	ACTCCATGCACCAACTTCTGA	59.579	21	ACTGCCTTCTAAACCCAAACCA	60.092	22	118	Glycerophospholipid metabolism	Lipid metabolism
T01-03_TRINITY_DN16740_c0_g1_i2	1	(A)10	10	AGTGGAAATTTTAACCTTGGACAGA	58.867	25	GCCATTACAGCAAAACCCCTG	60.067	21	105	Glycerophospholipid metabolism	Lipid metabolism
T01-03_TRINITY_DN16740_c0_g1_i2	1	(A)12	12	TGAAATGCTGCCTTCCAGGG	60.613	20	TGCTCATTTGTCAGCGGTACT	59.998	21	100	Glycerophospholipid metabolism	Lipid metabolism
T01-03_TRINITY_DN16829_c0_g1_i1	1	(CA)6cg(A)15	29	AGCGCCTATGTTAGTTCTCTTGT	59.804	23	TTCGTGTGTGTGTGTGAGGG	60.461	20	106	Fatty acid biosynthesis; Biotin metabolism	Lipid metabolism; Metabolism of cofactors and vitamins
T01-03_TRINITY_DN16860_c0_g1_i1	1	(A)10	10	AATTGGGAAGGTCCGCATGT	59.96	20	GTGTCCCATGGATGCTAGGG	59.891	20	99	Purine metabolism	Nucleotide metabolism
T01-03_TRINITY_DN16979_c0_g1_i21	1	(AG)9	18	TCTCCTGTAGTGCTTCCCTCT	59.641	21	GCTGTTTTTCTCGATGCATCCA	59.838	22	174	Oxidative phosphorylation	Energy metabolism
T01-03_TRINITY_DN16981_c2_g1_i1	1	(T)11	11	ACATCAAGATATTATCATCAATTCCGG	57.829	27	TGTAGTGTTATAGTCGGTTGTGA	57.037	23	150	Starch and sucrose metabolism	Carbohydrate metabolism
T01-03_TRINITY_DN16981_c2_g1_i1	1	(AC)10aaaagcgtgacttt(A)11tgtgtttctttatcattttaatcgttggaggtacaagacgtgttttaaacacca(T)15	114	CACACACACACACACACACA	59.129	20	GCCAACACATCGTGGAAGTG	59.762	20	219	Starch and sucrose metabolism	Carbohydrate metabolism
T01-03_TRINITY_DN17_c0_g1_i4	1	(TA)9	18	GCAGCTAAGCTTTTTGAGGCA	59.729	21	TGAGACAAGACAAGCCCTGG	59.602	20	101	Glutathione metabolism	Metabolism of other amino acids
T01-03_TRINITY_DN17050_c0_g1_i1	1	(A)14	14	CCTTCCCTTTGAACACGGGA	59.89	20	TTCAAGCTGTTAACCTCTAGGG	57.447	22	111	Thiamine metabolism	Metabolism of cofactors and vitamins
T01-03_TRINITY_DN17050_c0_g1_i1	1	(A)18	18	CGAAAACACAGGACATCACCC	59.465	21	TGCTGCCTTACTAACATTGTACT	57.839	23	199	Thiamine metabolism	Metabolism of cofactors and vitamins
T01-03_TRINITY_DN1707_c0_g3_i2	1	(T)10	10	TCAATAACCACCACCCCACC	59.594	20	GCATTGGCTGGCTCTGAGTA	60.108	20	230	Inositol phosphate metabolism	Carbohydrate metabolism
T01-03_TRINITY_DN17140_c0_g1_i1	1	(T)14	14	GAGGCATGGATCGAGTGGTT	59.821	20	GTAGTCAACCCCTCTCGCAG	59.826	20	221	Amino sugar and nucleotide sugar metabolism	Carbohydrate metabolism
T01-03_TRINITY_DN17192_c2_g1_i1	1	(A)10	10	TGCTTTCTGGTTTATGTCATGCT	58.919	23	TGGAAGCTGCACTTTCACAAG	59.322	21	174	Oxidative phosphorylation	Energy metabolism
T01-03_TRINITY_DN17194_c0_g2_i3	1	(A)10	10	TGTTCTCAAAGTGGACGCCA	59.821	20	AGTCCATAACTTCTCATGGTTGGT	59.71	24	201	Purine metabolism; Pyrimidine metabolism	Nucleotide metabolism
T01-03_TRINITY_DN172_c2_g1_i2	1	(AG)9	18	AATGGTCCTTTCCTGTCCCG	59.672	20	CCTCCTGGGTATGATCGTGC	59.966	20	192	N-Glycan biosynthesis; Various types of N-glycan biosynthesis	Glycan biosynthesis and metabolism
T01-03_TRINITY_DN172_c2_g1_i2	1	(T)10	10	TGATGATCCGCCCATAGTGA	58.284	20	GGGGGAACGAAACAAGACGA	60.25	20	274	N-Glycan biosynthesis; Various types of N-glycan biosynthesis	Glycan biosynthesis and metabolism
T01-03_TRINITY_DN17218_c2_g1_i1	1	(CT)10	20	CTTCCGGCTTCCGTCAAGTT	60.603	20	GGAACTGTAGATCCGGTGTCC	59.864	21	115	Purine metabolism; Pyrimidine metabolism	Nucleotide metabolism
T01-03_TRINITY_DN17218_c2_g1_i1	1	(T)10	10	TTGCCCTGGAATGTAGTGATCC	60.092	22	GACCTGCGATGTCCTCCAAT	59.821	20	99	Purine metabolism; Pyrimidine metabolism	Nucleotide metabolism
T01-03_TRINITY_DN1724_c0_g1_i17	1	(TC)6(AC)6	24	ACACACACAGACACACACGA	59.755	20	GTTCCCGACCTCTCGATTCC	59.897	20	161	Lipopolysaccharide biosynthesis	Glycan biosynthesis and metabolism
T01-03_TRINITY_DN1724_c0_g1_i17	1	(T)11	11	TGTCCATTTGGAGGGGAAGT	58.544	20	AGGGAACTCACCTAAGAGGCT	59.92	21	108	Lipopolysaccharide biosynthesis	Glycan biosynthesis and metabolism
T01-03_TRINITY_DN17265_c0_g1_i2	1	(TC)6	12	TCCCACAAAACCCATCTCAGT	59.22	21	GGCGGGGTTCTACATCAGAG	59.895	20	155	Fructose and mannose metabolism	Carbohydrate metabolism
T01-03_TRINITY_DN17265_c2_g1_i1	1	(TC)9	18	ACCTCTGTGTTTCTCTTTCCGT	59.565	22	AGAGAGGACCAAACAAACCCT	58.864	21	99	Starch and sucrose metabolism	Carbohydrate metabolism
T01-03_TRINITY_DN17265_c2_g1_i1	2	(AG)9	18	ACCTCTGTGTTTCTCTTTCCGT	59.565	22	AGAGAGGACCAAACAAACCCT	58.864	21	99	Starch and sucrose metabolism	Carbohydrate metabolism
T01-03_TRINITY_DN17265_c2_g1_i1	1	(TC)9	18	AGAGAGGACCAAACAAACCCT	58.864	21	ACCTCTGTGTTTCTCTTTCCGT	59.565	22	99	Starch and sucrose metabolism	Carbohydrate metabolism
T01-03_TRINITY_DN17265_c2_g1_i1	2	(AG)9	18	AGAGAGGACCAAACAAACCCT	58.864	21	ACCTCTGTGTTTCTCTTTCCGT	59.565	22	99	Starch and sucrose metabolism	Carbohydrate metabolism
T01-03_TRINITY_DN17298_c0_g2_i1	1	(CA)9	18	GGGCTTCCACCATATCCAACA	60.064	21	TCACCTCGCAATTGGCTCAT	60.035	20	204	Zeatin biosynthesis	Metabolism of terpenoids and polyketides
T01-03_TRINITY_DN1735_c1_g1_i3	1	(CT)7caaatatttattatcattattattttcaatttctagagaaaaacatgat(TA)6	75	GAAGAGAAGAACAGCGGGCT	60.037	20	CGTTACCACTATCCGACCCA	58.895	20	224	Propanoate metabolism; beta-Alanine metabolism	Carbohydrate metabolism; Metabolism of other amino acids
T01-03_TRINITY_DN1736_c0_g2_i2	1	(A)10	10	GACAACTGACGAGTCCCCAA	59.608	20	AGAGTCTGGGTTAGCGCTTG	59.752	20	105	Glycolysis / Gluconeogenesis; Pyruvate metabolism; Purine metabolism	Carbohydrate metabolism; Nucleotide metabolism
T01-03_TRINITY_DN17368_c0_g1_i1	1	(GAA)5	15	ACCCACACCCACTACATCAC	59.309	20	CCATGGGAAGGACTGAAGCA	59.671	20	196	Phenylpropanoid biosynthesis	Biosynthesis of other secondary metabolites
T01-03_TRINITY_DN17380_c0_g1_i12	1	(T)13	13	AGTTGAAACCAACAGTACAAGCA	58.986	23	TCGGACTCTACAATGTTAGCATGA	59.599	24	112	N-Glycan biosynthesis; Various types of N-glycan biosynthesis	Glycan biosynthesis and metabolism
T01-03_TRINITY_DN17380_c0_g1_i12	1	(GA)7cagaaatgtgtg(TC)7	40	TTGAGGATGGGAGGAGGGAG	60.031	20	TTGAGGATGGGAGGAGGGAG	60.031	20	207	N-Glycan biosynthesis; Various types of N-glycan biosynthesis	Glycan biosynthesis and metabolism
T01-03_TRINITY_DN1740_c0_g1_i1	1	(AAG)5	15	GCCGAGGATGTTGAAGGAGA	59.463	20	ACAAACATCTCCTAAGCCCCC	59.715	21	113	Starch and sucrose metabolism	Carbohydrate metabolism
T01-03_TRINITY_DN1740_c0_g1_i1	1	(T)10	10	TCTCTTTCTTGAGCTGAGCCA	59.026	21	AGAGTATTTGCCACAACAACAACA	59.599	24	100	Starch and sucrose metabolism	Carbohydrate metabolism
T01-03_TRINITY_DN1743_c0_g1_i5	1	(A)11	11	TCGGAAACCCAGGAGTAAAACT	59.293	22	GGCTTCACGTTTGATCCATCC	59.598	21	248	Folate biosynthesis	Metabolism of cofactors and vitamins
T01-03_TRINITY_DN17478_c0_g3_i4	1	(A)15	15	GTGGTCCCATGAATGAAACTGC	60.095	22	ACCAGGAGCAGTCCATTGAG	59.383	20	268	Glycerolipid metabolism	Lipid metabolism
T01-03_TRINITY_DN17478_c0_g3_i4	1	(T)13	13	TTGTGGACAGGACGTAAGCC	59.966	20	AGATCGCAGGGTTTCTAACGA	59.177	21	201	Glycerolipid metabolism	Lipid metabolism
T01-03_TRINITY_DN17478_c0_g3_i4	1	(A)10	10	GGCAGGTTGCTGTGTCCATA	60.322	20	CGATCCTTGATAGCAGTGGGA	59.311	21	170	Glycerolipid metabolism	Lipid metabolism
T01-03_TRINITY_DN17478_c0_g3_i4	1	(T)10	10	CCCACTGCTATCAAGGATCGA	59.311	21	GCACTCTCGGTTCACATTCC	58.92	20	166	Glycerolipid metabolism	Lipid metabolism
T01-03_TRINITY_DN17486_c0_g1_i2	1	(T)10	10	CTGGAGCTCGGTAATGTGGA	59.176	20	ACCCCATGGATGAAAGGTTCA	59.284	21	202	One carbon pool by folate; Purine metabolism	Metabolism of cofactors and vitamins; Nucleotide metabolism
T01-03_TRINITY_DN17509_c0_g1_i1	1	(CT)7	14	GTCCCAAGTTCTCTCGTGTCA	59.66	21	TCCCCAGAGTGTGATACCTGT	59.921	21	186	Arginine biosynthesis; Alanine, aspartate and glutamate metabolism	Amino acid metabolism
T01-03_TRINITY_DN1753_c0_g1_i10	1	(A)14	14	TCAGTTTCCCATTTGATGTGCA	58.771	22	TCCCCCATCAAGTTTCACACA	59.503	21	200	N-Glycan biosynthesis	Glycan biosynthesis and metabolism
T01-03_TRINITY_DN1753_c0_g1_i10	1	(T)10gaatgtgttatttgtacaaagtgcatatgcaatttatgactgttaggtcattgt(A)12	76	ACAATGAAGCACAAGTCGTTGG	59.967	22	CCAAGTGTTTGCAAGAACCCA	59.52	21	99	N-Glycan biosynthesis	Glycan biosynthesis and metabolism
T01-03_TRINITY_DN1753_c0_g1_i10	1	(T)10	10	TGGTAAGCTCCATGTTTCACT	57.212	21	AGGTATTGGCAAGAACCCTACA	59.083	22	174	N-Glycan biosynthesis	Glycan biosynthesis and metabolism
T01-03_TRINITY_DN1753_c0_g1_i10	1	(A)10	10	TGCGCAAGGGCTTTGAGTAT	60.322	20	CAAAAATTCAGCACCGCGGA	60.04	20	149	N-Glycan biosynthesis	Glycan biosynthesis and metabolism
T01-03_TRINITY_DN1753_c0_g1_i10	1	(A)12	12	GTTGGTCTCCTCAACCTCCA	58.943	20	TGGGCAGGCATATCCAAAGG	60.106	20	183	N-Glycan biosynthesis	Glycan biosynthesis and metabolism
T01-03_TRINITY_DN17531_c0_g3_i2	1	(T)11	11	TATTGGAGCTTGGCTTGGGG	60.033	20	TGTTGTTGCAGGCATACCCA	60.179	20	252	Glycosylphosphatidylinositol (GPI)-anchor biosynthesis	Glycan biosynthesis and metabolism
T01-03_TRINITY_DN1758_c0_g1_i5	1	(C)11	11	CAATCCCCACCACACATCCA	59.961	20	GTGGAGGAGGAGAAGGAGGT	59.958	20	206	Starch and sucrose metabolism	Carbohydrate metabolism
T01-03_TRINITY_DN1771_c0_g2_i18	1	(TTA)6	18	AGTTCTTCCGTGGCTCAAGG	59.965	20	GGCACCTGGATGTTGGAAGA	59.962	20	214	Purine metabolism	Nucleotide metabolism
T01-03_TRINITY_DN1771_c0_g2_i18	1	(T)10	10	AGCTCAGGAGGAATAGAGGCA	60.063	21	GCTTCCTCGGCCTCTTTGTA	59.751	20	148	Purine metabolism	Nucleotide metabolism
T01-03_TRINITY_DN17717_c0_g1_i1	1	(A)11	11	TTCATCACAAGTGGGCAGGG	60.251	20	TCTGATTTGCTGTTGAGTGGA	57.51	21	103	Pantothenate and CoA biosynthesis	Metabolism of cofactors and vitamins
T01-03_TRINITY_DN17728_c0_g1_i2	1	(A)13	13	ACACAACAGAACCACGTCCA	59.749	20	TTCGCACGAGGACCAATTGA	59.966	20	226	Photosynthesis	Energy metabolism
T01-03_TRINITY_DN1791_c0_g1_i3	1	(GA)7aagagaggatcgtgtggagagggaagaaaatgtatattttgggataaaaaaagggggggtg(GA)6	87	ATGGAGAGAGATTGGCTGCG	59.894	20	TTCCCTCTCCACACGATCCT	59.959	20	120	Glyoxylate and dicarboxylate metabolism; Nitrogen metabolism	Carbohydrate metabolism; Energy metabolism
T01-03_TRINITY_DN1791_c0_g1_i3	1	(TC)6caccccccctttttttatcccaaaatatacattttcttccctctccacacgatcctctctt(TC)7	87	TTCCCTCTCCACACGATCCT	59.959	20	ATGGAGAGAGATTGGCTGCG	59.894	20	120	Glyoxylate and dicarboxylate metabolism; Nitrogen metabolism	Carbohydrate metabolism; Energy metabolism
T01-03_TRINITY_DN1791_c1_g1_i12	1	(A)16	16	TGCAATCAAGTTGTTTTTCGGT	57.883	22	CCTGGCACCCCTTACACATT	59.96	20	276	Porphyrin metabolism	Metabolism of cofactors and vitamins
T01-03_TRINITY_DN18017_c0_g1_i1	1	(T)10	10	TGGAAGAAGGTTCATCGATGCT	59.763	22	ACATTGAGATGGCTTCCACCA	59.645	21	144	Ubiquinone and other terpenoid-quinone biosynthesis	Metabolism of cofactors and vitamins
T01-03_TRINITY_DN1808_c0_g1_i35	1	(A)10	10	CGATTTACAGTGGGGGCACT	60.035	20	CCTGTGGGGGCAACTAAGAG	60.035	20	147	Streptomycin biosynthesis; Neomycin, kanamycin and gentamicin biosynthesis; Glycolysis / Gluconeogenesis; Fructose and mannose metabolism; Galactose metabolism; Starch and sucrose metabolism; Amino sugar and nucleotide sugar metabolism	Biosynthesis of other secondary metabolites; Carbohydrate metabolism
T01-03_TRINITY_DN1808_c0_g1_i35	1	(T)15	15	TGGAGGTCATAAGCAGCATTTG	58.981	22	GCAGCAGCAAAATATGGGCT	59.537	20	191	Streptomycin biosynthesis; Neomycin, kanamycin and gentamicin biosynthesis; Glycolysis / Gluconeogenesis; Fructose and mannose metabolism; Galactose metabolism; Starch and sucrose metabolism; Amino sugar and nucleotide sugar metabolism	Biosynthesis of other secondary metabolites; Carbohydrate metabolism
T01-03_TRINITY_DN18263_c0_g1_i2	1	(A)10	10	TGAGAGGAGTGGAGGGATGT	59.287	20	TGGAGGGATTTTGAGCCAAGT	59.571	21	102	Pentose and glucuronate interconversions	Carbohydrate metabolism
T01-03_TRINITY_DN183_c1_g1_i1	1	(TG)8	16	AGCTCCGTTGCCAGATGAAA	59.963	20	AGACCCGCTCGAAGTTGAAG	60.038	20	218	Valine, leucine and isoleucine biosynthesis; Glucosinolate biosynthesis; C5-Branched dibasic acid metabolism	Amino acid metabolism; Biosynthesis of other secondary metabolites; Carbohydrate metabolism
T01-03_TRINITY_DN183_c1_g1_i1	1	(TTA)6	18	CTTCAACTTCGAGCGGGTCT	60.038	20	TCCAAGGCGTTTATTCACCAC	58.844	21	139	Valine, leucine and isoleucine biosynthesis; Glucosinolate biosynthesis; C5-Branched dibasic acid metabolism	Amino acid metabolism; Biosynthesis of other secondary metabolites; Carbohydrate metabolism
T01-03_TRINITY_DN18369_c0_g1_i1	1	(A)10ggttctgctacaaatagctaac(A)12	44	ACAGCCCAAAAGTCCAACCT	59.738	20	ATGATTCGTTTAGCCGCCCT	59.82	20	149	Glycerophospholipid metabolism	Lipid metabolism
T01-03_TRINITY_DN18388_c2_g1_i1	1	(TG)6	12	GTGTGTGTGTGCATGGTGTC	59.971	20	TGTGTGTGTGTGTGTGTGGA	59.965	20	160	Pentose and glucuronate interconversions	Carbohydrate metabolism
T01-03_TRINITY_DN18388_c2_g1_i1	2	(CA)10	20	GTGTGTGTGTGCATGGTGTC	59.971	20	TGTGTGTGTGTGTGTGTGGA	59.965	20	160	Pentose and glucuronate interconversions	Carbohydrate metabolism
T01-03_TRINITY_DN1844_c5_g1_i2	1	(A)14	14	ACCTTGCCTTGAAATTTTCCCA	58.955	22	TAATGCGCTATGTGGCCCAA	60.107	20	102	Amino sugar and nucleotide sugar metabolism	Carbohydrate metabolism
T01-03_TRINITY_DN1847_c0_g1_i4	1	(GA)6	12	GGGCTGGCGCATATGAGATA	59.75	20	GAAAAAGCTGCCCTAACGCA	59.404	20	115	Arginine biosynthesis; Alanine, aspartate and glutamate metabolism	Amino acid metabolism
T01-03_TRINITY_DN18494_c0_g1_i2	1	(TC)7	14	TCGGCTCTTTGTGGATCAAT	57.213	20	TGAGAGAGGGGAGACAGAGAG	59.436	21	176	Glycerophospholipid metabolism	Lipid metabolism
T01-03_TRINITY_DN18494_c0_g1_i2	1	(T)11	11	TGTTAGGCTCTCCGCTCTCT	60.034	20	AGGTCTAGACTGTTGGATGATGA	58.386	23	261	Glycerophospholipid metabolism	Lipid metabolism
T01-03_TRINITY_DN1855_c1_g2_i3	1	(T)14	14	TGGGTTCTGTTCAGGCATCT	58.933	20	ACGTGAGAAACAGAAGCAAAACC	60.181	23	109	Oxidative phosphorylation	Energy metabolism
T01-03_TRINITY_DN1855_c1_g2_i3	1	(A)10	10	ACGATTCAGTTATGTAAGTTGCCA	58.758	24	ACCAATCAATTTGATTCAAGGCT	57.25	23	258	Oxidative phosphorylation	Energy metabolism
T01-03_TRINITY_DN18709_c0_g1_i2	1	(A)13	13	TCCTATGGTTCCTGGGTGGG	60.623	20	ACATCCAACAACTGTGCCCA	60.106	20	240	Phenylpropanoid biosynthesis	Biosynthesis of other secondary metabolites
T01-03_TRINITY_DN1875_c0_g1_i2	1	(T)16	16	AGCCTCTCACTTCCCCATCT	59.956	20	ATCCCTCCCCTCTGCTGAAT	60.029	20	168	Purine metabolism; Pyrimidine metabolism	Nucleotide metabolism
T01-03_TRINITY_DN189_c0_g1_i8	1	(T)13	13	TCGCCATGGCCTATTACGTC	59.967	20	ACTGCCTGCCACATGTAAGG	60.323	20	114	Galactose metabolism	Carbohydrate metabolism
T01-03_TRINITY_DN18919_c1_g1_i2	1	(AAAG)5	20	CGGCAAACCCCAAAGAATCG	60.109	20	ATGCAAAGCTAGCGGGGAAT	60.107	20	190	Sphingolipid metabolism	Lipid metabolism
T01-03_TRINITY_DN18919_c1_g1_i2	1	(A)12	12	GGAACTTAGCACAGAAGGACTCA	59.993	23	TCCTTTTGGCTATTTATGAGGGA	57.274	23	117	Sphingolipid metabolism	Lipid metabolism
T01-03_TRINITY_DN19023_c4_g1_i1	1	(T)15	15	ACCCAATGGTGTTGACCCAT	59.513	20	CGGGAACTTCCTAACGGGTG	60.391	20	111	Valine, leucine and isoleucine degradation; Prodigiosin biosynthesis; Propanoate metabolism; Fatty acid biosynthesis; Biosynthesis of unsaturated fatty acids; Biotin metabolism	Amino acid metabolism; Biosynthesis of other secondary metabolites; Carbohydrate metabolism; Lipid metabolism; Metabolism of cofactors and vitamins
T01-03_TRINITY_DN1904_c0_g2_i1	1	(CT)9	18	CAAGGCAAAGGCGAAGTCAC	60.04	20	GAGTGCTCGTGCCAGAGTAA	59.756	20	157	Oxidative phosphorylation	Energy metabolism
T01-03_TRINITY_DN1904_c0_g2_i1	1	(CT)9	18	CAAGGCAAAGGCGAAGTCAC	60.04	20	GAGTGCTCGTGCCAGAGTAA	59.756	20	157	Oxidative phosphorylation	Energy metabolism
T01-03_TRINITY_DN19081_c0_g3_i2	1	(T)11	11	TCTGTGGGGAGTTCAATTCAGA	59.021	22	GGGAGGTTGAAGATGATGGGT	59.434	21	124	Arginine biosynthesis; Alanine, aspartate and glutamate metabolism; Nitrogen metabolism	Amino acid metabolism; Energy metabolism
T01-03_TRINITY_DN19081_c0_g3_i2	1	(A)14ctgtataaagaaa(T)11	38	TGATTCATTGGCTTAGGAGGGT	59.148	22	ATTCAAGTTCTCCAGCGGCA	59.963	20	264	Arginine biosynthesis; Alanine, aspartate and glutamate metabolism; Nitrogen metabolism	Amino acid metabolism; Energy metabolism
T01-03_TRINITY_DN19085_c0_g1_i1	1	(TA)11	22	TGGCTGATTTTGGTTCGCAAG	60	21	CCATCTCTTGCACTCGTCCA	59.753	20	188	Fatty acid biosynthesis; Biotin metabolism	Lipid metabolism; Metabolism of cofactors and vitamins
T01-03_TRINITY_DN19092_c0_g1_i1	1	(A)11	11	GCCGGCAGCCTTCAAAATTA	59.47	20	TCTCACCTCTTGGGGCAAAC	59.89	20	225	Valine, leucine and isoleucine degradation	Amino acid metabolism
T01-03_TRINITY_DN1918_c1_g1_i29	1	(ATA)7	21	TTTCTAAAGCTCTGCCCCCG	60.035	20	TCAACGATGCCTCTGAACAGA	59.382	21	209	Alanine, aspartate and glutamate metabolism; Arginine and proline metabolism	Amino acid metabolism
T01-03_TRINITY_DN1918_c1_g1_i29	1	(A)17	17	CCAACACCACTGCCCTCTAG	60.036	20	AACAGGGGTACAGCCATTCG	60.035	20	116	Alanine, aspartate and glutamate metabolism; Arginine and proline metabolism	Amino acid metabolism
T01-03_TRINITY_DN1921_c0_g1_i14	1	(A)14	14	GGGCAACTCAATTTCGTGCT	59.402	20	TGTTCTCCCCTAGCCGATGA	60.033	20	120	Lipopolysaccharide biosynthesis	Glycan biosynthesis and metabolism
T01-03_TRINITY_DN19300_c0_g2_i2	1	(TG)26	52	TGGGTGTGGAGTGTGAAAGG	59.817	20	GCACACACACACACACACAC	60.454	20	170	Purine metabolism	Nucleotide metabolism
T01-03_TRINITY_DN19309_c0_g1_i2	1	(A)11	11	TGGAGACGATTTAGTAACTTGGAGT	59.521	25	CACCATTAAAACTTGTGACCCCC	59.994	23	268	Taurine and hypotaurine metabolism	Metabolism of other amino acids
T01-03_TRINITY_DN19309_c0_g1_i2	1	(T)16	16	TGGGTGCTATCATTGGTTGTTG	59.175	22	TGCTCCAATCAAGCAGACCT	59.305	20	248	Taurine and hypotaurine metabolism	Metabolism of other amino acids
T01-03_TRINITY_DN19309_c0_g1_i2	1	(T)15	15	TGCTTGATTGGAGCAAAGTGG	59.385	21	AGTTCTCAATCCTCCGGCTA	57.839	20	220	Taurine and hypotaurine metabolism	Metabolism of other amino acids
T01-03_TRINITY_DN1931_c0_g1_i4	1	(T)15	15	GCTAATGCAACTTGAGGCCG	59.901	20	AGCCAACCCAGAAAAGTCGA	59.528	20	221	Phenylpropanoid biosynthesis	Biosynthesis of other secondary metabolites
T01-03_TRINITY_DN1935_c0_g1_i1	1	(A)11	11	TGCAGAACTCCATCCCCATG	59.743	20	GGGGGACAAAGTAAGCCTCA	59.303	20	153	Alanine, aspartate and glutamate metabolism; Glycine, serine and threonine metabolism; Glyoxylate and dicarboxylate metabolism; Methane metabolism	Amino acid metabolism; Carbohydrate metabolism; Energy metabolism
T01-03_TRINITY_DN19368_c1_g1_i1	1	(A)15	15	TGCTTTCCACAAGGGCTTGA	60.106	20	GGTGAAGACCCTGAGACAGC	60.037	20	229	Purine metabolism; Pyrimidine metabolism	Nucleotide metabolism
T01-03_TRINITY_DN1938_c0_g1_i11	1	(TA)10	20	TGTGAGCCCTCCTCCTTAGT	59.586	20	CCGACCTTGTTTCTGTTGCC	59.689	20	144	Arginine biosynthesis; Alanine, aspartate and glutamate metabolism; Glycine, serine and threonine metabolism; Glyoxylate and dicarboxylate metabolism; Carbon fixation in photosynthetic organisms	Amino acid metabolism; Carbohydrate metabolism; Energy metabolism
T01-03_TRINITY_DN19380_c2_g1_i1	1	(A)10	10	CTTCGCGCATATGATTTGCCA	60.003	21	AACAGGCGCAACAAAGGACT	60.752	20	236	Glycosylphosphatidylinositol (GPI)-anchor biosynthesis	Glycan biosynthesis and metabolism
T01-03_TRINITY_DN19380_c2_g1_i1	1	(A)13	13	CCTTGGACTCACCTTGTGACA	59.859	21	GGCTACCGAACTTCCACCTA	58.811	20	169	Glycosylphosphatidylinositol (GPI)-anchor biosynthesis	Glycan biosynthesis and metabolism
T01-03_TRINITY_DN195_c0_g1_i12	1	(A)12	12	AGGAAAAGGAGAGGCCAAGA	58.253	20	TTCAAGTGGGAGGCTCTGTG	59.602	20	131	Folate biosynthesis	Metabolism of cofactors and vitamins
T01-03_TRINITY_DN1957_c2_g1_i10	1	(CA)6	12	GCTCCCACAGGTAAGGCTTT	59.962	20	TTTGTGTGTGTGTGCGTGTG	60.11	20	107	Phenylpropanoid biosynthesis; Starch and sucrose metabolism; Cyanoamino acid metabolism	Biosynthesis of other secondary metabolites; Carbohydrate metabolism; Metabolism of other amino acids
T01-03_TRINITY_DN1959_c0_g1_i2	1	(T)13	13	CCAAATAGCCATCCGTTGCA	58.898	20	ACAGGCAGTTCACAACCAAA	58.154	20	128	Prodigiosin biosynthesis; Fatty acid biosynthesis	Biosynthesis of other secondary metabolites; Lipid metabolism
T01-03_TRINITY_DN1959_c0_g1_i2	1	(T)10	10	TTTTCCCCCTTTGACAGGCA	59.737	20	ATTGGCGCTTGAGGGAAGAC	60.678	20	130	Prodigiosin biosynthesis; Fatty acid biosynthesis	Biosynthesis of other secondary metabolites; Lipid metabolism
T01-03_TRINITY_DN1959_c0_g1_i2	1	(A)10	10	ATTGGCGCTTGAGGGAAGAC	60.678	20	TTTTCCCCCTTTGACAGGCA	59.737	20	130	Prodigiosin biosynthesis; Fatty acid biosynthesis	Biosynthesis of other secondary metabolites; Lipid metabolism
T01-03_TRINITY_DN1959_c0_g1_i2	1	(A)13	13	ACAGGCAGTTCACAACCAAA	58.154	20	CCAAATAGCCATCCGTTGCA	58.898	20	128	Prodigiosin biosynthesis; Fatty acid biosynthesis	Biosynthesis of other secondary metabolites; Lipid metabolism
T01-03_TRINITY_DN1962_c0_g1_i13	1	(T)15	15	TGCGTACTACCTGCCATATCT	58.406	21	TGTGTTGAGGTTGGATTACTACT	57.181	23	173	Glycosaminoglycan degradation	Glycan biosynthesis and metabolism
T01-03_TRINITY_DN1962_c2_g1_i1	1	(T)12	12	GGAGCGGATCCTCTGTTGTA	58.888	20	AGACGGTCATTGAAACCCCA	59.231	20	125	Zeatin biosynthesis	Metabolism of terpenoids and polyketides
T01-03_TRINITY_DN19682_c0_g1_i3	1	(T)12ggttgggggttgagaggtttttatggtgtttatgtttttgtttgattttacttaattgtttgctaattgaaacttttataatcttta(T)10	109	GGGGAAAGGGTTTCTTTGGG	58.652	20	AAACCGCCGACAAAATGCAA	59.897	20	142	Amino sugar and nucleotide sugar metabolism	Carbohydrate metabolism
T01-03_TRINITY_DN19682_c0_g1_i3	2	(A)11	11	GGGGAAAGGGTTTCTTTGGG	58.652	20	AAACCGCCGACAAAATGCAA	59.897	20	142	Amino sugar and nucleotide sugar metabolism	Carbohydrate metabolism
T01-03_TRINITY_DN19682_c0_g1_i3	1	(T)10	10	TGATGAGCCTTTTGTTGTGCT	58.69	21	TGCCATTGCATTCCCATCAA	58.43	20	242	Amino sugar and nucleotide sugar metabolism	Carbohydrate metabolism
T01-03_TRINITY_DN19682_c0_g1_i3	2	(A)11	11	TGATGAGCCTTTTGTTGTGCT	58.69	21	TGCCATTGCATTCCCATCAA	58.43	20	242	Amino sugar and nucleotide sugar metabolism	Carbohydrate metabolism
T01-03_TRINITY_DN19682_c0_g1_i3	1	(T)12	12	GCCATCTTTCTGGTCCCACA	59.962	20	TCCCATGACAAGACCTCCCT	59.881	20	125	Amino sugar and nucleotide sugar metabolism	Carbohydrate metabolism
T01-03_TRINITY_DN19682_c0_g1_i3	1	(T)13	13	TGCAAACTGTGTTTGTCATGTCA	59.808	23	CGAGCGCGTTGATCTCTTTG	59.976	20	261	Amino sugar and nucleotide sugar metabolism	Carbohydrate metabolism
T01-03_TRINITY_DN1978_c1_g1_i1	1	(C)10	10	CGCCTGGACTTGGTTCTTCT	59.965	20	TGAACAATGCATGGACGTGC	59.759	20	261	Oxidative phosphorylation	Energy metabolism
T01-03_TRINITY_DN19896_c0_g1_i13	1	(G)10	10	TCCAAAGGAAGGAGTGACGC	59.965	20	CGCGGTAGAAAAAGCGTGTT	59.766	20	208	Oxidative phosphorylation	Energy metabolism
T01-03_TRINITY_DN19896_c0_g1_i13	1	(T)10	10	AAGTGTGGAGGAGAAGCAGC	59.964	20	GGGCTAAGCGCAGTTCTTTG	59.831	20	279	Oxidative phosphorylation	Energy metabolism
T01-03_TRINITY_DN19924_c0_g1_i3	1	(A)11	11	TGGGCTATCATTTTGGCCTGT	59.993	21	GGTGCAGAGGATATGTGGACT	59.235	21	255	Arginine biosynthesis; Alanine, aspartate and glutamate metabolism; Cysteine and methionine metabolism; Arginine and proline metabolism; Tyrosine metabolism; Phenylalanine metabolism; Phenylalanine, tyrosine and tryptophan biosynthesis; Isoquinoline alkaloid biosynthesis; Tropane, piperidine and pyridine alkaloid biosynthesis; Carbon fixation in photosynthetic organisms	Amino acid metabolism; Biosynthesis of other secondary metabolites; Energy metabolism
T01-03_TRINITY_DN19947_c0_g1_i1	1	(AG)8	16	GCCGACGTACGAACAGGTAT	59.901	20	CCCCAGAATTTGCGGCAAAA	59.965	20	258	Glycerophospholipid metabolism	Lipid metabolism
T01-03_TRINITY_DN20041_c0_g2_i1	1	(T)11	11	TGCAAATGACTGGGGAAGCT	59.887	20	TGCAATATGCTAAACCACTTTCAGA	59.29	25	124	Purine metabolism; Pyrimidine metabolism	Nucleotide metabolism
T01-03_TRINITY_DN20041_c0_g2_i1	1	(T)10	10	CCGGGAAAGTATCGATAGGCC	60.067	21	GGACCAACCTAGCCCAAGTC	60.035	20	110	Purine metabolism; Pyrimidine metabolism	Nucleotide metabolism
T01-03_TRINITY_DN2012_c0_g1_i41	1	(A)16	16	TTTGAAACTCCTCGGGCTCC	59.964	20	GACCTGAAACCAGAGTCGCA	59.966	20	202	Amino sugar and nucleotide sugar metabolism; Other glycan degradation; Various types of N-glycan biosynthesis; Glycosaminoglycan degradation; Glycosphingolipid biosynthesis - globo and isoglobo series; Glycosphingolipid biosynthesis - ganglio series	Carbohydrate metabolism; Glycan biosynthesis and metabolism
T01-03_TRINITY_DN20129_c1_g1_i3	1	(A)18	18	TCAAAGGGAGGCTTCTTGGT	58.851	20	CACTCTATGGTCCTGGCTTGT	59.443	21	157	Sphingolipid metabolism	Lipid metabolism
T01-03_TRINITY_DN20129_c1_g1_i3	1	(T)11	11	GGTGGTGGCAAAGCTTCAAC	60.249	20	GCTGTTGCCTGAAACACCAG	59.969	20	216	Sphingolipid metabolism	Lipid metabolism
T01-03_TRINITY_DN20131_c0_g2_i1	1	(TCA)5	15	ACATGTTGGATGTACCCAGGT	59.007	21	TGGGATAAGGCTTGGGTGATG	59.785	21	179	Glycerophospholipid metabolism	Lipid metabolism
T01-03_TRINITY_DN2025_c0_g1_i1	1	(TC)7	14	TTCAGAAGGGAGGGTGTGGA	60.105	20	TCAATGGCTGTTGGTTTGGC	59.608	20	105	Tyrosine metabolism; Phenylalanine metabolism; Ubiquinone and other terpenoid-quinone biosynthesis	Amino acid metabolism; Metabolism of cofactors and vitamins
T01-03_TRINITY_DN20281_c0_g1_i1	1	(T)16	16	CTAACATACGGCCCCTCGAG	59.686	20	TCTCCCGATGAGTGCAGGTA	60.034	20	173	Glycolysis / Gluconeogenesis; Citrate cycle (TCA cycle); Pyruvate metabolism; Carbon fixation in photosynthetic organisms	Carbohydrate metabolism; Energy metabolism
T01-03_TRINITY_DN20319_c0_g1_i7	1	(A)14	14	GGGATTTCAGTGGCCATCCA	60.033	20	GGGCTTCATGGTCTAGATTGGA	59.56	22	112	Oxidative phosphorylation	Energy metabolism
T01-03_TRINITY_DN20319_c0_g1_i7	1	(TG)6	12	GGGATTTCAGTGGCCATCCA	60.033	20	ACTGAGGTCCTCATTTGGGC	59.67	20	128	Oxidative phosphorylation	Energy metabolism
T01-03_TRINITY_DN20319_c0_g1_i7	1	(A)13	13	CTCCCTGCTTACGACACGAA	59.757	20	TGTTGAGTGGGGTTGCTTCT	59.449	20	172	Oxidative phosphorylation	Energy metabolism
T01-03_TRINITY_DN20319_c0_g1_i7	1	(T)11	11	CATGTCCCACCCATGTGTCA	59.962	20	TCGTACCTAGAAACATCCATGCA	59.551	23	164	Oxidative phosphorylation	Energy metabolism
T01-03_TRINITY_DN20319_c0_g1_i7	1	(A)12	12	ATGGATGTCGCTGCAGGTAG	59.894	20	GTGCTTTCCCGAGTTCCTGA	59.965	20	152	Oxidative phosphorylation	Energy metabolism
T01-03_TRINITY_DN20346_c0_g2_i2	1	(AAT)6	18	GACATTGCACGCAGTAAGCA	59.483	20	TTGTGGTGTTGTGTGGTTGC	59.755	20	170	Glycine, serine and threonine metabolism; Methane metabolism	Amino acid metabolism; Energy metabolism
T01-03_TRINITY_DN20346_c0_g2_i2	1	(T)21	21	ACCACTGACTGAAGAACGGA	58.59	20	AGGGAAGGGTGGGGGTTATA	59.267	20	221	Glycine, serine and threonine metabolism; Methane metabolism	Amino acid metabolism; Energy metabolism
T01-03_TRINITY_DN20389_c0_g1_i3	1	(T)10	10	GACGCATGGTTGCCAGAATC	59.901	20	CCCCCACTCCTCCTCTTCTT	60.253	20	117	Pentose and glucuronate interconversions	Carbohydrate metabolism
T01-03_TRINITY_DN20523_c0_g1_i1	1	(T)15	15	TGATTACTGTCATGGATCCTGCA	59.544	23	AGTAAATGTGTCCAAGTGATCAGA	57.886	24	210	Starch and sucrose metabolism	Carbohydrate metabolism
T01-03_TRINITY_DN20598_c0_g1_i6	1	(A)10	10	TGACAAGTTCTGTGCCAGCT	59.819	20	TGACCTTATACGTCTCCCTCCT	59.487	22	117	Caffeine metabolism; Purine metabolism	Biosynthesis of other secondary metabolites; Nucleotide metabolism
T01-03_TRINITY_DN20598_c0_g1_i6	1	(T)14	14	TGTGAAGTGCCTCCCAAGTT	59.449	20	TGTACTGAGGTCAAACAATCCCA	59.607	23	273	Caffeine metabolism; Purine metabolism	Biosynthesis of other secondary metabolites; Nucleotide metabolism
T01-03_TRINITY_DN2061_c0_g2_i10	1	(A)17	17	GGGAAGAGGGTATGGGGGAT	60.104	20	TGCTGGTTGATTTGGGACGT	60.179	20	123	Phenylalanine, tyrosine and tryptophan biosynthesis; Phenazine biosynthesis	Amino acid metabolism; Biosynthesis of other secondary metabolites
T01-03_TRINITY_DN20625_c0_g2_i1	1	(ACT)5	15	AGGAAGAGCATCCATGATCACA	59.224	22	CTCTCTCAGCGACGTTCCTG	60.179	20	224	Glutathione metabolism; Metabolism of xenobiotics by cytochrome P450; Drug metabolism - cytochrome P450; Drug metabolism - other enzymes	Metabolism of other amino acids; Xenobiotics biodegradation and metabolism
T01-03_TRINITY_DN2067_c0_g5_i1	1	(GGT)5	15	GAAGGTGATGGAGGTGGTGG	60.035	20	TCCCAACCCTAGTTCCACCA	60.104	20	147	Tryptophan metabolism	Amino acid metabolism
T01-03_TRINITY_DN2071_c0_g1_i1	1	(AGA)5	15	TGCTTTCTCTGCAGGTGTGT	59.819	20	TTGGGGCTGCGGTTACTAAG	60.036	20	141	Glycine, serine and threonine metabolism; Tyrosine metabolism; Phenylalanine metabolism; Isoquinoline alkaloid biosynthesis; Tropane, piperidine and pyridine alkaloid biosynthesis; beta-Alanine metabolism	Amino acid metabolism; Biosynthesis of other secondary metabolites; Metabolism of other amino acids
T01-03_TRINITY_DN2075_c0_g1_i1	1	(GA)9	18	AGAGAGAGGCAAAGGACCCA	60.179	20	GGAAGGGGTTAGCTGGGAAC	60.034	20	154	Aflatoxin biosynthesis; Pyruvate metabolism; Propanoate metabolism; Fatty acid biosynthesis	Biosynthesis of other secondary metabolites; Carbohydrate metabolism; Lipid metabolism
T01-03_TRINITY_DN20776_c0_g1_i1	1	(TTG)5	15	ATGGAGCCTCACTTCAACCC	59.67	20	GCAAGACCGAAAGCCAAACA	59.616	20	110	Phenylpropanoid biosynthesis; Starch and sucrose metabolism; Cyanoamino acid metabolism	Biosynthesis of other secondary metabolites; Carbohydrate metabolism; Metabolism of other amino acids
T01-03_TRINITY_DN208_c1_g1_i2	1	(A)14	14	TGAGGTGTAGACCCCTGCTT	60.179	20	TCTTGACTCCCTGACTCAACT	58.036	21	102	Pentose and glucuronate interconversions; Fructose and mannose metabolism	Carbohydrate metabolism
T01-03_TRINITY_DN2086_c0_g1_i1	1	(AAT)7	21	GTTGCCGTGTTGCTTGGAAG	60.595	20	AACCATCACTCAGGCTCAGC	60.036	20	237	Pentose and glucuronate interconversions; Fructose and mannose metabolism	Carbohydrate metabolism
T01-03_TRINITY_DN2086_c0_g1_i1	1	(ATT)7	21	AACCATCACTCAGGCTCAGC	60.036	20	GTTGCCGTGTTGCTTGGAAG	60.595	20	237	Pentose and glucuronate interconversions; Fructose and mannose metabolism	Carbohydrate metabolism
T01-03_TRINITY_DN2086_c0_g1_i1	1	(AC)9	18	GAGGCTAGTTGCACACCACT	59.965	20	AGTTGTCGCAATGAAGTGCA	58.692	20	106	Pentose and glucuronate interconversions; Fructose and mannose metabolism	Carbohydrate metabolism
T01-03_TRINITY_DN2086_c0_g1_i1	1	(A)11	11	AGGAAAATATGGGGTGCAACA	57.817	21	ACACCCATCGACTGCCAATT	59.962	20	116	Pentose and glucuronate interconversions; Fructose and mannose metabolism	Carbohydrate metabolism
T01-03_TRINITY_DN2086_c0_g1_i1	1	(A)11	11	TGGAGGTGGAGGAGTCATGT	59.883	20	GTGCAAGACCCTACCTATTTCCA	60.055	23	233	Pentose and glucuronate interconversions; Fructose and mannose metabolism	Carbohydrate metabolism
T01-03_TRINITY_DN2086_c0_g1_i1	1	(A)12	12	TGCATACCATGTTTAGTTTGTACAT	57.305	25	TCTATGCAAAAATCCAAGCTGAGT	58.988	24	140	Pentose and glucuronate interconversions; Fructose and mannose metabolism	Carbohydrate metabolism
T01-03_TRINITY_DN2086_c0_g1_i1	1	(T)20	20	ATGTGGGCCTGCAAATGTGA	60.542	20	TGCTCCTGGAGGAAACCCAT	60.846	20	99	Pentose and glucuronate interconversions; Fructose and mannose metabolism	Carbohydrate metabolism
T01-03_TRINITY_DN2094_c3_g1_i7	1	(TC)11	22	ACTTGTTCTCTCATGGCGGG	60.036	20	AGGTCTCCACATCTCGAGAA	57.484	20	113	Amino sugar and nucleotide sugar metabolism	Carbohydrate metabolism
T01-03_TRINITY_DN21072_c0_g1_i1	1	(T)11	11	TTGAAGAGGAGTGTTGCCCC	59.89	20	CATCGTCTCCGTCTTCCCAC	60.179	20	100	Glycine, serine and threonine metabolism; Glyoxylate and dicarboxylate metabolism; Methane metabolism; One carbon pool by folate; Cyanoamino acid metabolism	Amino acid metabolism; Carbohydrate metabolism; Energy metabolism; Metabolism of cofactors and vitamins; Metabolism of other amino acids
T01-03_TRINITY_DN21072_c3_g1_i1	1	(T)10	10	ATGATTGGAGGGTGGCGATG	60.179	20	GTTGTGGGTTGTCAAGGGGA	60.106	20	123	Glycine, serine and threonine metabolism; Glyoxylate and dicarboxylate metabolism; Methane metabolism; One carbon pool by folate; Cyanoamino acid metabolism	Amino acid metabolism; Carbohydrate metabolism; Energy metabolism; Metabolism of cofactors and vitamins; Metabolism of other amino acids
T01-03_TRINITY_DN21117_c0_g1_i4	1	(A)15	15	TCATGCCCCGAAGAGGAAAA	59.304	20	ACGCTTAACAGGTACTCTTCAA	57.404	22	195	Porphyrin metabolism	Metabolism of cofactors and vitamins
T01-03_TRINITY_DN21127_c0_g1_i2	1	(T)10	10	CAGCCAAGAAGTGAGGAGGG	60.036	20	GACAAAAACACCCCCAAAGTCA	59.502	22	206	Glycerolipid metabolism; Glycerophospholipid metabolism	Lipid metabolism
T01-03_TRINITY_DN21158_c0_g1_i2	1	(A)10	10	AAGATGTGCCCTCATGAAGG	57.568	20	CCCCTTGCTATGTGAAGGAGT	59.438	21	149	Fatty acid degradation; alpha-Linolenic acid metabolism	Lipid metabolism
T01-03_TRINITY_DN21158_c0_g1_i2	1	(T)10	10	AGCAAGGGGAGTAAGATGCA	58.711	20	AGAGGAGGAGACACGTCGTT	60.251	20	142	Fatty acid degradation; alpha-Linolenic acid metabolism	Lipid metabolism
T01-03_TRINITY_DN2121_c0_g1_i7	1	(GT)7	14	TCAACTCGAACAGGGGTGTG	59.894	20	AGGGCATCACTGAGTCAACTC	59.722	21	131	Purine metabolism; Pyrimidine metabolism	Nucleotide metabolism
T01-03_TRINITY_DN2121_c0_g1_i7	1	(AG)13	26	TGTGATGGAGCATCTGGAGC	59.82	20	GCCTAGGGTTTCAGCTCTGG	60.107	20	107	Purine metabolism; Pyrimidine metabolism	Nucleotide metabolism
T01-03_TRINITY_DN2121_c1_g1_i3	1	(AG)9	18	TGGCCCTTGTTTGAGCTCTG	60.538	20	AGAGAGAGTGAGAGAGGCGT	59.382	20	279	Amino sugar and nucleotide sugar metabolism	Carbohydrate metabolism
T01-03_TRINITY_DN21256_c0_g1_i1	1	(T)10	10	ACCGAACATGATTCCTGTCTCA	59.433	22	TGTGGAGACAGGATTGCCTT	58.933	20	235	Lysine biosynthesis; Monobactam biosynthesis	Amino acid metabolism; Biosynthesis of other secondary metabolites
T01-03_TRINITY_DN2129_c0_g1_i2	1	(T)10	10	ACCATGGGGAGAACTTCAGA	57.955	20	TGGGGAGAAAACAAAGCCCA	59.737	20	108	Thiamine metabolism; Purine metabolism	Metabolism of cofactors and vitamins; Nucleotide metabolism
T01-03_TRINITY_DN2133_c0_g4_i1	1	(T)11	11	CGGATTGAGCTGACATCCGT	60.179	20	ACAGAAGGGAGGAGCCGTAT	60.032	20	105	Photosynthesis	Energy metabolism
T01-03_TRINITY_DN21336_c0_g1_i1	1	(CA)6	12	AAGAGCACACACACACACCA	60.036	20	TGGGTGGGTGAGAATTTGCA	59.813	20	120	Glycine, serine and threonine metabolism; Cysteine and methionine metabolism; Lysine biosynthesis; Monobactam biosynthesis	Amino acid metabolism; Biosynthesis of other secondary metabolites
T01-03_TRINITY_DN21429_c0_g1_i1	1	(A)11	11	TGACCACTGTCAGTTGCTCT	58.877	20	GCAACAACAAAAAGGAGCCCT	59.861	21	133	Oxidative phosphorylation	Energy metabolism
T01-03_TRINITY_DN2143_c1_g1_i4	1	(A)11	11	ACTCACCAAGATTTGAACCCCA	59.823	22	ACTTCAGATGGGGGTATGAACC	59.49	22	252	Pyruvate metabolism	Carbohydrate metabolism
T01-03_TRINITY_DN2143_c5_g1_i1	1	(T)14	14	TTGTTCAGCGGCTGTCAAAA	58.901	20	TCTCGCAACTGAAGGCAATCT	59.998	21	213	Purine metabolism	Nucleotide metabolism
T01-03_TRINITY_DN21466_c0_g1_i2	1	(T)16	16	TTCGTTGAAGCAGCGGGTTA	60.25	20	TTCAACTTAGCGGCAGACCC	60.321	20	99	Oxidative phosphorylation	Energy metabolism
T01-03_TRINITY_DN215_c0_g1_i7	1	(AAAG)8	32	AGTGCCAAGTGAAGAGTCGG	59.966	20	ACCCATAGCCCAACAATGGT	59.29	20	145	Cysteine and methionine metabolism; Selenocompound metabolism	Amino acid metabolism; Metabolism of other amino acids
T01-03_TRINITY_DN2166_c0_g2_i1	1	(T)10	10	TGGAGTCCGTTCATGTTGGG	59.964	20	AGGGAGCTGGGAAGGAGAAT	59.955	20	120	Pentose phosphate pathway; Purine metabolism	Carbohydrate metabolism; Nucleotide metabolism
T01-03_TRINITY_DN2176_c0_g1_i1	1	(GA)9gttggtggtgctctcctatgatctcactctttagccctttataaattctcaagaactcatcatcgaagagcaccaccaa(CT)9	115	TCGAAGAGCACCACCAACTC	59.966	20	CGTTGAAACCACGCTTCCAT	59.409	20	100	Glutathione metabolism; Metabolism of xenobiotics by cytochrome P450; Drug metabolism - cytochrome P450; Drug metabolism - other enzymes	Metabolism of other amino acids; Xenobiotics biodegradation and metabolism
T01-03_TRINITY_DN2181_c0_g1_i21	1	(AAT)5	15	AGGGAACTTTCTTCAAGGCCA	59.501	21	TAGCTTTCAGCCCATCGCAT	59.819	20	219	Lysine degradation	Amino acid metabolism
T01-03_TRINITY_DN2183_c0_g1_i22	1	(TG)6	12	ACATGTGTGTGTGTGGGTGG	60.751	20	AACTGCTAACCGATGCTGCT	60.036	20	101	Oxidative phosphorylation	Energy metabolism
T01-03_TRINITY_DN2184_c0_g1_i18	1	(A)12	12	CAGTTGTGTATCGGTGCCCT	60.036	20	AGGCACTGATCCACAACTGA	58.941	20	178	Starch and sucrose metabolism	Carbohydrate metabolism
T01-03_TRINITY_DN21851_c0_g1_i1	1	(T)11	11	AGCAGCTTCAATCCCACGAA	59.963	20	ATTGAAGCAGTCACCGCAGA	59.965	20	218	Phenylpropanoid biosynthesis	Biosynthesis of other secondary metabolites
T01-03_TRINITY_DN219_c0_g2_i2	1	(TTG)6	18	GCCGCACTTTGCTTCTTCTC	60.11	20	GATCCTGCTTCCGAGATCCG	60.039	20	210	Pyruvate metabolism; Propanoate metabolism; Carbon fixation pathways in prokaryotes; Fatty acid biosynthesis	Carbohydrate metabolism; Energy metabolism; Lipid metabolism
T01-03_TRINITY_DN22060_c0_g1_i2	1	(T)12	12	CCCGAATTTGTTCAGTCAACCC	60.03	22	TGCTGATTGGGGAAGTTCTTGA	59.892	22	142	Starch and sucrose metabolism; Amino sugar and nucleotide sugar metabolism	Carbohydrate metabolism
T01-03_TRINITY_DN22060_c0_g1_i2	1	(A)12	12	TGCAGATTGGGGAAGTTCTTGA	59.892	22	CCCGAATTTGTTCAGTCAACCC	60.03	22	142	Starch and sucrose metabolism; Amino sugar and nucleotide sugar metabolism	Carbohydrate metabolism
T01-03_TRINITY_DN22077_c0_g1_i1	1	(TGA)6	18	GCTCTTCATCCGACCCCAAA	60.035	20	TCCCAAGAATAACCCTGCCA	58.622	20	174	Starch and sucrose metabolism	Carbohydrate metabolism
T01-03_TRINITY_DN22115_c0_g2_i1	1	(T)10	10	AGCTAGTTGGCACCTTCGAA	59.315	20	ATGAAGGGGTGTGGATGCAA	59.591	20	107	Valine, leucine and isoleucine biosynthesis; Glucosinolate biosynthesis; C5-Branched dibasic acid metabolism	Amino acid metabolism; Biosynthesis of other secondary metabolites; Carbohydrate metabolism
T01-03_TRINITY_DN22167_c0_g1_i1	1	(A)12	12	CCTGTCATCCTTCCCTTAGCC	59.858	21	GCAGTGGAATTTTGGTGGCA	59.608	20	131	Terpenoid backbone biosynthesis	Metabolism of terpenoids and polyketides
T01-03_TRINITY_DN2219_c0_g1_i7	1	(GCT)5	15	TGCTGGTCTTCCTCTTGCTG	59.964	20	TTCCTGGGCCTAGACGATCA	60.033	20	130	Fructose and mannose metabolism; Methane metabolism; Glycerolipid metabolism	Carbohydrate metabolism; Energy metabolism; Lipid metabolism
T01-03_TRINITY_DN2221_c2_g1_i3	1	(TC)19	38	AAGCCTACGAGGAGAGCTGA	60.034	20	AGGCTTCGGATCTCCCTTCT	60.032	20	114	Photosynthesis - antenna proteins	Energy metabolism
T01-03_TRINITY_DN22281_c0_g4_i1	1	(T)11	11	TGTGCTCTATGCCGTTGGAA	59.677	20	CAAGTCTCCACTCCAATCGCT	60.067	21	209	Phenylalanine, tyrosine and tryptophan biosynthesis	Amino acid metabolism
T01-03_TRINITY_DN2229_c0_g1_i2	1	(GA)9	18	CTGCGCCTTCCTCCATAGAT	59.316	20	CGTCGACTCTCAGCCAAGAA	59.759	20	270	Cysteine and methionine metabolism; Arginine and proline metabolism; beta-Alanine metabolism; Glutathione metabolism	Amino acid metabolism; Metabolism of other amino acids
T01-03_TRINITY_DN223_c1_g2_i2	1	(T)10	10	GTTGCACACAGATGGACGTG	59.764	20	CTCTGCCGGTGGGATGATTT	60.107	20	171	Other types of O-glycan biosynthesis	Glycan biosynthesis and metabolism
T01-03_TRINITY_DN223_c1_g2_i2	1	(T)10	10	AAATCATCCCACCGGCAGAG	60.107	20	AGGACTGGGGATCTGCATCT	60.03	20	131	Other types of O-glycan biosynthesis	Glycan biosynthesis and metabolism
T01-03_TRINITY_DN223_c1_g2_i2	2	(TTCA)5	20	AAATCATCCCACCGGCAGAG	60.107	20	AGGACTGGGGATCTGCATCT	60.03	20	131	Other types of O-glycan biosynthesis	Glycan biosynthesis and metabolism
T01-03_TRINITY_DN2237_c0_g1_i4	1	(AATA)5	20	CCGCCCCCTAAATTTGGAGA	59.742	20	TCACAGATGCAAGGAGCTCC	59.749	20	174	Fructose and mannose metabolism; Amino sugar and nucleotide sugar metabolism	Carbohydrate metabolism
T01-03_TRINITY_DN22371_c0_g1_i1	1	(T)16	16	CGGATTCGATCTGGTTTTGCA	59.263	21	GGGTTTGAAATCGCGAAGGG	59.83	20	243	Sphingolipid metabolism	Lipid metabolism
T01-03_TRINITY_DN22371_c0_g2_i1	1	(A)16	16	GGGTTTGAAATCGCGAAGGG	59.83	20	CGGATTCGATCTGGTTTTGCA	59.263	21	243	Sphingolipid metabolism	Lipid metabolism
T01-03_TRINITY_DN225_c0_g2_i1	1	(A)10	10	GGGTTCAAGCTGAGTGGACA	59.891	20	ACCAAGCAGGGTTCTTCAGG	59.889	20	102	Valine, leucine and isoleucine degradation; Lysine degradation; Arginine and proline metabolism; Histidine metabolism; Tryptophan metabolism; Glycolysis / Gluconeogenesis; Ascorbate and aldarate metabolism; Pyruvate metabolism; Fatty acid degradation; Glycerolipid metabolism; beta-Alanine metabolism; Limonene and pinene degradation; Insect hormone biosynthesis; Chloroalkane and chloroalkene degra…	Amino acid metabolism; Carbohydrate metabolism; Lipid metabolism; Metabolism of other amino acids; Metabolism of terpenoids and polyketides; Xenobiotics biodegradation and metabolism
T01-03_TRINITY_DN2261_c1_g2_i1	1	(T)10	10	TGGGAGGTAAGGTGTCACCA	60.105	20	TCTGGAATCGGGGATGTTGA	58.421	20	150	Galactose metabolism	Carbohydrate metabolism
T01-03_TRINITY_DN2264_c0_g1_i1	1	(AG)20	40	CTGATCTCGCCACCGAAACT	60.109	20	ACAGTTCTTGCACCGATCGT	59.966	20	261	Amino sugar and nucleotide sugar metabolism	Carbohydrate metabolism
T01-03_TRINITY_DN22800_c4_g1_i2	1	(AG)7	14	TTCTCGGTCTCCATTGGCAC	60.036	20	AACCCCCTTCACCAACCTTC	59.812	20	138	Phenylalanine metabolism; Phenylpropanoid biosynthesis; Ubiquinone and other terpenoid-quinone biosynthesis	Amino acid metabolism; Biosynthesis of other secondary metabolites; Metabolism of cofactors and vitamins
T01-03_TRINITY_DN22819_c2_g1_i2	1	(T)12	12	TCTACAAACTGGTCTTGGGGC	59.927	21	TGTTGATGTTGGACATTCAAAGGT	59.351	24	172	Phenylpropanoid biosynthesis	Biosynthesis of other secondary metabolites
T01-03_TRINITY_DN22819_c2_g1_i2	2	(AT)8	16	TCTACAAACTGGTCTTGGGGC	59.927	21	TGTTGATGTTGGACATTCAAAGGT	59.351	24	172	Phenylpropanoid biosynthesis	Biosynthesis of other secondary metabolites
T01-03_TRINITY_DN22819_c2_g1_i2	1	(T)12	12	ACACGCACTACCCTTGGATT	59.309	20	CCCGTGATTGACTTCCTCCC	60.108	20	138	Phenylpropanoid biosynthesis	Biosynthesis of other secondary metabolites
T01-03_TRINITY_DN22819_c2_g1_i2	2	(AT)8	16	ACACGCACTACCCTTGGATT	59.309	20	CCCGTGATTGACTTCCTCCC	60.108	20	138	Phenylpropanoid biosynthesis	Biosynthesis of other secondary metabolites
T01-03_TRINITY_DN22833_c0_g1_i19	1	(T)10	10	GCTCCCAGCAGGTTCTAAACA	60.271	21	AATGGGGCAATGCTCTCTGC	61.041	20	109	Glyoxylate and dicarboxylate metabolism	Carbohydrate metabolism
T01-03_TRINITY_DN22833_c0_g1_i19	1	(A)10	10	AATGGGGCAATGCTCTCTGC	61.041	20	GCTCCCAGCAGGTTCTAAACA	60.271	21	109	Glyoxylate and dicarboxylate metabolism	Carbohydrate metabolism
T01-03_TRINITY_DN2288_c2_g1_i1	1	(T)12	12	GCAACACCCCATTCGAATTCA	59.456	21	GGGAACCGAAATGCTGGGAT	60.396	20	103	Porphyrin metabolism	Metabolism of cofactors and vitamins
T01-03_TRINITY_DN2288_c2_g1_i1	1	(A)10	10	ACAGGGGATACAACTTAAAGAAGACA	59.956	26	TTCGCAAAGCTTGTTGAGGC	59.969	20	183	Porphyrin metabolism	Metabolism of cofactors and vitamins
T01-03_TRINITY_DN23_c0_g1_i2	1	(T)10	10	TGCTCGAGATCCGTCAACTC	59.548	20	AGGGCAGTGGAGAATGAACG	60.036	20	135	Oxidative phosphorylation	Energy metabolism
T01-03_TRINITY_DN23012_c0_g1_i1	1	(A)13	13	CGCTCCTGGAGTTCTATGCG	60.596	20	CATGACGCTTCGTGACAACC	59.836	20	185	Glycosylphosphatidylinositol (GPI)-anchor biosynthesis	Glycan biosynthesis and metabolism
T01-03_TRINITY_DN2308_c0_g1_i56	1	(A)12	12	TTCTGGAAGTCTTCAGAAGCGT	59.634	22	TCAATTTGGGGATCCATGCCA	59.992	21	99	Phenylpropanoid biosynthesis	Biosynthesis of other secondary metabolites
T01-03_TRINITY_DN23089_c1_g4_i1	1	(T)10	10	TGTTTACCGAACCCCATCCC	59.671	20	GTTGGAACTCACTGGCCAGA	59.891	20	164	Fatty acid biosynthesis	Lipid metabolism
T01-03_TRINITY_DN23089_c1_g4_i1	1	(A)11	11	GGGATTGTTGATCACCCTGT	57.486	20	TTTTTGGGTGTGAGAAGGTGA	57.626	21	99	Fatty acid biosynthesis	Lipid metabolism
T01-03_TRINITY_DN23131_c2_g1_i2	1	(TA)6	12	TCAGCGTGGATTCAATGGAGA	59.445	21	CCATCACCAAGACAACAGCC	59.116	20	134	Glycine, serine and threonine metabolism; Glycolysis / Gluconeogenesis; Methane metabolism	Amino acid metabolism; Carbohydrate metabolism; Energy metabolism
T01-03_TRINITY_DN23131_c3_g1_i1	1	(T)16aacccttaaaagtaaaaaatgttaaaaaagaaaattcccattttggggtttttc(T)13aacttgggccttggggtttatatatgtgtgtgaaagagg(GA)6	134	AACTTGGGCCTTGGGGTTTA	59.436	20	GAAGAACCAGCTGAGCTCGA	59.755	20	103	Carotenoid biosynthesis	Metabolism of terpenoids and polyketides
T01-03_TRINITY_DN23155_c0_g2_i1	1	(A)11	11	GCCAAAAAGCCAAATGACTAGC	59.004	22	AGCTCGTTAAGGAGTTCAAGGG	60.028	22	115	Purine metabolism; Pyrimidine metabolism	Nucleotide metabolism
T01-03_TRINITY_DN23155_c0_g2_i1	1	(A)11	11	CCGATGATTTGGCCAGCAAG	59.898	20	AGCGGAAATTGTGTTGTGCA	59.256	20	120	Purine metabolism; Pyrimidine metabolism	Nucleotide metabolism
T01-03_TRINITY_DN23160_c0_g1_i1	1	(AT)6	12	CAAAACCGTGGGCTCTTGTG	59.969	20	TGGCAAGGGAAAAGTGTGAA	57.848	20	186	Glycolysis / Gluconeogenesis; Citrate cycle (TCA cycle); Pyruvate metabolism; Carbon fixation in photosynthetic organisms	Carbohydrate metabolism; Energy metabolism
T01-03_TRINITY_DN233_c0_g1_i2	1	(T)10	10	AGGGAAGGCGTATGTTGGTG	60.035	20	ACGAAATTCAGGGGTGATGCT	59.995	21	221	Fatty acid biosynthesis; Biotin metabolism	Lipid metabolism; Metabolism of cofactors and vitamins
T01-03_TRINITY_DN2348_c1_g1_i2	1	(CT)7	14	GTGTTGATGGCGCCATTGTT	60.038	20	GTCCTTTCACACTCGAGCCA	59.966	20	104	Flavonoid biosynthesis	Biosynthesis of other secondary metabolites
T01-03_TRINITY_DN23544_c0_g1_i2	1	(A)10	10	TCGAAACTGACTCATGCCGA	59.399	20	TGAGACTTGGAAGCACCTCAG	59.654	21	269	Arachidonic acid metabolism; Glutathione metabolism	Lipid metabolism; Metabolism of other amino acids
T01-03_TRINITY_DN2369_c0_g3_i2	1	(AG)13	26	TACGATGTCATGTCTCCGGC	59.616	20	ACTGCTCTGACCAGAATCTCA	58.466	21	155	Glycerophospholipid metabolism; alpha-Linolenic acid metabolism	Lipid metabolism
T01-03_TRINITY_DN23692_c0_g1_i1	1	(GA)8	16	CGCCTTGACCTTGTTTGCTT	59.615	20	TTCGAAGCTCCTCCCAAACC	59.964	20	114	Arginine biosynthesis	Amino acid metabolism
T01-03_TRINITY_DN2373_c2_g1_i2	1	(T)12	12	TCTAATTGCAATTTTGATACCCAACT	57.867	26	TGGGATGCATATATGGTAAGGAAA	57.538	24	120	Glycerolipid metabolism	Lipid metabolism
T01-03_TRINITY_DN2373_c2_g1_i2	2	(T)12	12	TCTAATTGCAATTTTGATACCCAACT	57.867	26	TGGGATGCATATATGGTAAGGAAA	57.538	24	120	Glycerolipid metabolism	Lipid metabolism
T01-03_TRINITY_DN2373_c2_g1_i2	1	(TTG)6	18	ATTGCAGAGAGCTGGTGCAT	60.034	20	ATAGGCAGCAACGACGACAA	60.038	20	111	Glycerolipid metabolism	Lipid metabolism
T01-03_TRINITY_DN23871_c0_g1_i1	1	(A)10	10	CTCTAGAGAGTTGAGGCGATGT	59.051	22	GTTGTTGAAGGGTTGGGGGA	60.106	20	229	Terpenoid backbone biosynthesis	Metabolism of terpenoids and polyketides
T01-03_TRINITY_DN23933_c0_g1_i2	1	(A)10	10	GGAAACTGTCCCACTTTGAACA	58.979	22	GCATCTTGCAGGTTGGTGAG	59.475	20	110	Fatty acid biosynthesis; Fatty acid degradation	Lipid metabolism
T01-03_TRINITY_DN2396_c1_g1_i2	1	(T)13	13	CTTGGACGTCGTTTGCTTGG	60.041	20	GCCAACCCCTTGGGGTTATC	60.686	20	251	Thiamine metabolism	Metabolism of cofactors and vitamins
T01-03_TRINITY_DN240_c0_g3_i1	1	(TG)8	16	CAACTCTTAAGGCTGGCCCA	59.962	20	GATCTAATGCGCCCACCTCA	59.893	20	268	Lysine degradation	Amino acid metabolism
T01-03_TRINITY_DN240_c0_g4_i2	1	(A)13	13	CGATGTGTGGAGGGTGCTTA	59.751	20	ACTGGTGAAGGAAATCTCTCCA	58.749	22	148	Porphyrin metabolism	Metabolism of cofactors and vitamins
T01-03_TRINITY_DN24002_c2_g1_i13	1	(TG)6	12	TTTGCACGTGACAAGCTTGG	59.9	20	ACACACACACACAAAGGGGA	59.67	20	134	Porphyrin metabolism	Metabolism of cofactors and vitamins
T01-03_TRINITY_DN2410_c1_g1_i9	1	(GA)8	16	GAGGTGGAGGTGGCCTAGTA	60.032	20	CGAATAGCTGCTCTCTGCGA	59.97	20	210	Isoflavonoid biosynthesis	Biosynthesis of other secondary metabolites
T01-03_TRINITY_DN24101_c1_g1_i1	1	(T)10	10	CCTTGTATGCAGCTGTGGGA	60.035	20	AACACGCCCTGCATTTCTCT	60.251	20	105	Glycolysis / Gluconeogenesis; Pyruvate metabolism; Purine metabolism	Carbohydrate metabolism; Nucleotide metabolism
T01-03_TRINITY_DN24106_c0_g1_i26	1	(CT)6	12	GGAGAGCCCATGAAGACGAG	59.896	20	AGAGAGAGAGAGGCGTTGGT	59.961	20	133	One carbon pool by folate	Metabolism of cofactors and vitamins
T01-03_TRINITY_DN24284_c0_g1_i1	1	(T)13gggcaagatttccatcgaaatcactattcatttcatggaatttacactgaataatgta(T)10	81	CTGTGGCCTTTCAGACTGCT	60.251	20	TCGATGGAAATCTTGCCCAA	57.494	20	168	Glycosaminoglycan biosynthesis - heparan sulfate / heparin	Glycan biosynthesis and metabolism
T01-03_TRINITY_DN243_c0_g1_i12	1	(A)14	14	GTCCTCTTAACGCTGACGCT	60.109	20	ATACACCTGCCACCCACATG	60.034	20	188	Glycolysis / Gluconeogenesis; Citrate cycle (TCA cycle); Pyruvate metabolism; Carbon fixation in photosynthetic organisms	Carbohydrate metabolism; Energy metabolism
T01-03_TRINITY_DN2440_c1_g1_i1	1	(CT)9	18	TCGTTTGGCTTGGGAGTTGT	60.107	20	TCGCCATTCGCTCTGTTTCT	60.037	20	129	Alanine, aspartate and glutamate metabolism	Amino acid metabolism
T01-03_TRINITY_DN24456_c0_g1_i2	1	(T)10	10	TGACATTACACATTAACAAGTTTGCT	58.288	26	TGGTGAATCGTGCCTTGAGA	59.315	20	108	Nicotinate and nicotinamide metabolism	Metabolism of cofactors and vitamins
T01-03_TRINITY_DN246_c0_g1_i12	1	(AG)6	12	TCCTTCGCGACTCCTGTAGA	60.036	20	TGGCGGTATCCCCAATTTCC	60.106	20	221	Carbon fixation in photosynthetic organisms	Energy metabolism
T01-03_TRINITY_DN24725_c0_g1_i1	1	(A)13	13	CCGACAGAATGGAGTCTCCG	59.899	20	CTGGACCTCATCGCCACATT	60.108	20	120	Ubiquinone and other terpenoid-quinone biosynthesis	Metabolism of cofactors and vitamins
T01-03_TRINITY_DN24725_c0_g1_i1	2	(T)10	10	CCGACAGAATGGAGTCTCCG	59.899	20	CTGGACCTCATCGCCACATT	60.108	20	120	Ubiquinone and other terpenoid-quinone biosynthesis	Metabolism of cofactors and vitamins
T01-03_TRINITY_DN24725_c1_g1_i2	1	(A)16	16	TTTACGGTTGGCGGGAAGAA	59.892	20	AGCAAGGTGAAGTTGGGTTCA	60.064	21	103	Nicotinate and nicotinamide metabolism; Pyrimidine metabolism	Metabolism of cofactors and vitamins; Nucleotide metabolism
T01-03_TRINITY_DN2488_c0_g1_i7	1	(T)12	12	TGCTAAGCTTGGGGTGTGAA	59.524	20	AGCGACCACGTTAGGAGAAC	59.757	20	169	Glycine, serine and threonine metabolism; Glyoxylate and dicarboxylate metabolism; Methane metabolism; One carbon pool by folate; Cyanoamino acid metabolism	Amino acid metabolism; Carbohydrate metabolism; Energy metabolism; Metabolism of cofactors and vitamins; Metabolism of other amino acids
T01-03_TRINITY_DN24920_c0_g1_i1	1	(A)10	10	ATGTGTCCTTAGGCCACACG	60.036	20	ACATGCACACGTTAAGGTCCA	60.203	21	151	alpha-Linolenic acid metabolism	Lipid metabolism
T01-03_TRINITY_DN2493_c0_g1_i1	1	(AAG)5	15	TGACTTTGCCTGCTGCCTAT	59.671	20	GAGGGGACTAAGGAAACCACA	59.017	21	245	Biosynthesis of terpenoids and steroids; Carotenoid biosynthesis	Chemical structure transformation maps; Metabolism of terpenoids and polyketides
T01-03_TRINITY_DN24979_c0_g2_i1	1	(T)10	10	TCAAAGAAGAGTACAAGCCAGCT	59.928	23	TGTTGTTGTTTGGGTGTTGCT	59.379	21	100	Arginine and proline metabolism; Phenylalanine metabolism; Tryptophan metabolism; Aminobenzoate degradation; Styrene degradation	Amino acid metabolism; Xenobiotics biodegradation and metabolism
T01-03_TRINITY_DN25019_c0_g1_i32	1	(T)17	17	GGTGGCTACCGTATTTTGTGA	58.298	21	AGGAATGCATACTCAATGAACTTGA	58.817	25	168	Terpenoid backbone biosynthesis	Metabolism of terpenoids and polyketides
T01-03_TRINITY_DN2506_c4_g1_i1	1	(A)13	13	AGGTTACTGTTGCAGCTGCT	59.891	20	CGAGGCCACAGAAACCATCT	60.036	20	262	Purine metabolism; Pyrimidine metabolism; Drug metabolism - other enzymes	Nucleotide metabolism; Xenobiotics biodegradation and metabolism
T01-03_TRINITY_DN2511_c0_g1_i11	1	(A)16	16	ATACACCTTGGGGGAGGGTT	60.179	20	AATGCTCACCTGATCCTGCC	60.107	20	154	Starch and sucrose metabolism	Carbohydrate metabolism
T01-03_TRINITY_DN2511_c0_g1_i11	1	(TTG)5	15	GGCAGGATCAGGTGAGCATT	60.107	20	CCCCATACCAGCAACAGCAA	60.612	20	131	Starch and sucrose metabolism	Carbohydrate metabolism
T01-03_TRINITY_DN2511_c0_g1_i11	1	(TGA)5	15	TTTGGAGACGGTGGAATGGG	59.962	20	TCCACCCTCCAAAAGTTGCC	60.469	20	213	Starch and sucrose metabolism	Carbohydrate metabolism
T01-03_TRINITY_DN2511_c0_g1_i11	1	(T)10	10	ACGTATGCCAGCTGACGAAT	59.824	20	CCTGCACTAGTCATAGCACGT	59.865	21	119	Starch and sucrose metabolism	Carbohydrate metabolism
T01-03_TRINITY_DN2511_c0_g1_i11	1	(T)10	10	CACACTTTGCTACCCAATCGG	59.531	21	TGCTTGCTGATGACTGTCAA	57.741	20	163	Starch and sucrose metabolism	Carbohydrate metabolism
T01-03_TRINITY_DN2511_c0_g3_i1	1	(A)10	10	AAGAATGTGTGTCCAAGAGCT	57.501	21	GTGTGGGCCTTCTAGTTGGA	59.309	20	106	Starch and sucrose metabolism	Carbohydrate metabolism
T01-03_TRINITY_DN25273_c0_g1_i2	1	(AG)9	18	AATGAACAACGCTTCCGCAC	60.04	20	TCGTAGAGGCCATCAGTGCT	60.684	20	237	Pentose and glucuronate interconversions	Carbohydrate metabolism
T01-03_TRINITY_DN253_c1_g1_i2	1	(CT)6	12	TTTTCGACAGCACGCAGTTG	59.973	20	GGGTTAGAGCTGTGTGACCT	59.023	20	141	Alanine, aspartate and glutamate metabolism; Purine metabolism	Amino acid metabolism; Nucleotide metabolism
T01-03_TRINITY_DN2543_c0_g1_i1	1	(A)14	14	CCTGCCCACATCCTGCATAA	60.107	20	TTGCGGCCTTTACGAGTCTT	59.966	20	107	Glycine, serine and threonine metabolism; Methane metabolism	Amino acid metabolism; Energy metabolism
T01-03_TRINITY_DN2555_c0_g1_i4	1	(A)10	10	TGGCACATATTGTCGGCCTA	59.166	20	GGACTGTAAACCACGCCCAT	60.322	20	204	Phenylalanine, tyrosine and tryptophan biosynthesis	Amino acid metabolism
T01-03_TRINITY_DN25610_c0_g1_i1	1	(T)12	12	TGCATCGACTGATTGGTCCA	59.387	20	CAAGGGAAAAGGTTTGCTCCA	58.961	21	182	Citrate cycle (TCA cycle); Carbon fixation pathways in prokaryotes	Carbohydrate metabolism; Energy metabolism
T01-03_TRINITY_DN2563_c1_g1_i2	1	(A)11	11	TCTTGCAATTCGCGAAGGATC	59.334	21	ACCTGAACCTGAACCTGCTT	59.153	20	243	Folate biosynthesis	Metabolism of cofactors and vitamins
T01-03_TRINITY_DN2564_c2_g1_i1	1	(AG)7	14	TGGAGGAGACCGAGTTGTGA	60.179	20	ACGCCATTGAAGAACGAGGT	59.965	20	185	Glycolysis / Gluconeogenesis; Pentose and glucuronate interconversions; Glycerolipid metabolism; Caprolactam degradation	Carbohydrate metabolism; Lipid metabolism; Xenobiotics biodegradation and metabolism
T01-03_TRINITY_DN2567_c0_g1_i1	1	(CAC)7	21	GGTCTCCCTCACTTTCAGCC	60.036	20	CCATACGGACGGACGGAAAT	59.896	20	99	Arginine and proline metabolism	Amino acid metabolism
T01-03_TRINITY_DN2577_c0_g1_i16	1	(A)10	10	TGTCCCTTCTCACTCCAGCA	60.472	20	GCTAGGCTGTGAGTCCCAAA	59.675	20	106	Glycine, serine and threonine metabolism; Cysteine and methionine metabolism; Lysine biosynthesis; Monobactam biosynthesis	Amino acid metabolism; Biosynthesis of other secondary metabolites
T01-03_TRINITY_DN2577_c0_g2_i3	1	(AG)21	42	AAACACAGGCACACACATGC	59.897	20	AGACGGTTCGTTTTCAGGTCT	59.588	21	124	Glycine, serine and threonine metabolism; Tyrosine metabolism; Phenylalanine metabolism; Isoquinoline alkaloid biosynthesis; Tropane, piperidine and pyridine alkaloid biosynthesis; beta-Alanine metabolism	Amino acid metabolism; Biosynthesis of other secondary metabolites; Metabolism of other amino acids
T01-03_TRINITY_DN2577_c0_g2_i3	1	(AG)7	14	GGGAGGTTTGGAAGGAGAGG	59.379	20	AACATGGCGACGCTTTTTCC	60.04	20	134	Glycine, serine and threonine metabolism; Tyrosine metabolism; Phenylalanine metabolism; Isoquinoline alkaloid biosynthesis; Tropane, piperidine and pyridine alkaloid biosynthesis; beta-Alanine metabolism	Amino acid metabolism; Biosynthesis of other secondary metabolites; Metabolism of other amino acids
T01-03_TRINITY_DN25886_c0_g1_i1	1	(A)10	10	TGCAACAATCAGCCATCAATT	57.035	21	TGATACCCTTCACCTCAACACA	59.024	22	128	Fructose and mannose metabolism	Carbohydrate metabolism
T01-03_TRINITY_DN259_c1_g2_i1	1	(TC)8	16	TCCAATCTCAGCTCTTGTTTAACA	58.38	24	TTGTGGACTTGTGGCTGAGG	60.179	20	227	Starch and sucrose metabolism	Carbohydrate metabolism
T01-03_TRINITY_DN2593_c0_g1_i16	1	(A)11	11	TCTCTTAAATCCACTGGTCTCATTGA	59.787	26	TCGCCTTCTTCCCAACATCA	59.31	20	268	Phenylpropanoid biosynthesis; Starch and sucrose metabolism; Cyanoamino acid metabolism	Biosynthesis of other secondary metabolites; Carbohydrate metabolism; Metabolism of other amino acids
T01-03_TRINITY_DN2600_c0_g1_i7	1	(T)10	10	ATGAGAGCAACTCCAACGGG	60.036	20	TCGTCGGGAAAACAAGAGTGA	59.59	21	227	Oxidative phosphorylation	Energy metabolism
T01-03_TRINITY_DN2610_c0_g1_i6	1	(A)10	10	GCACAGATGCCCCAGCTAAT	60.467	20	GGGAAGGAACATCACCTGCA	59.962	20	224	Peptidoglycan biosynthesis	Glycan biosynthesis and metabolism
T01-03_TRINITY_DN2610_c0_g1_i6	1	(A)10	10	CGAGGTTGGTGGCCTTACAA	60.251	20	AGGCTAATGTTTCTGCCCCT	58.997	20	194	Peptidoglycan biosynthesis	Glycan biosynthesis and metabolism
T01-03_TRINITY_DN2610_c0_g3_i2	1	(A)12	12	CAGCAACCTGTTGAGCAAGT	58.973	20	TCTTGGAGCAGCATCAGCAA	59.963	20	241	Peptidoglycan biosynthesis	Glycan biosynthesis and metabolism
T01-03_TRINITY_DN262_c0_g2_i7	1	(TC)6tttctctgtacctcgtgtacgcacagaagttcagagaa(AG)6	62	GCCTCTCAAGCTCTCCTTCG	60.179	20	GCCTCTCAAGCTCTCCTTCG	60.179	20	108	Pyruvate metabolism; Carbon fixation in photosynthetic organisms	Carbohydrate metabolism; Energy metabolism
T01-03_TRINITY_DN262_c1_g1_i1	1	(AG)8	16	TGGCTTCGAGAACAGCGATT	60.037	20	GCCAAGAAAGCTTCGGTGAC	59.761	20	138	Arginine biosynthesis; Alanine, aspartate and glutamate metabolism; Cysteine and methionine metabolism; Arginine and proline metabolism; Tyrosine metabolism; Phenylalanine metabolism; Phenylalanine, tyrosine and tryptophan biosynthesis; Isoquinoline alkaloid biosynthesis; Tropane, piperidine and pyridine alkaloid biosynthesis; Carbon fixation in photosynthetic organisms	Amino acid metabolism; Biosynthesis of other secondary metabolites; Energy metabolism
T01-03_TRINITY_DN26255_c0_g2_i1	1	(A)11	11	AGGTTCTCACTGAATTGGGCA	59.575	21	GCTAGGGGTCCGCTTATCAC	59.966	20	136	Pyruvate metabolism; Propanoate metabolism; Photosynthesis; Carbon fixation pathways in prokaryotes; Fatty acid biosynthesis	Carbohydrate metabolism; Energy metabolism; Lipid metabolism
T01-03_TRINITY_DN2631_c0_g1_i1	1	(A)10	10	TCCCACCACCTTCTCCAAAC	59.523	20	GTTGATTGGCTGTTGGGCTG	60.038	20	106	Photosynthesis	Energy metabolism
T01-03_TRINITY_DN26425_c0_g1_i2	1	(CT)8	16	CTCGATCTGGTGGAGGAACC	59.538	20	GAGCTGCCATAGACCTCCTC	59.321	20	256	Glycine, serine and threonine metabolism; Glyoxylate and dicarboxylate metabolism; One carbon pool by folate	Amino acid metabolism; Carbohydrate metabolism; Metabolism of cofactors and vitamins
T01-03_TRINITY_DN26425_c0_g1_i2	1	(T)12	12	TGGAACCAGCCCCAAGTTTT	60.032	20	GGAACCAGCCCCAAGTTTTT	58.872	20	177	Glycine, serine and threonine metabolism; Glyoxylate and dicarboxylate metabolism; One carbon pool by folate	Amino acid metabolism; Carbohydrate metabolism; Metabolism of cofactors and vitamins
T01-03_TRINITY_DN26425_c0_g1_i2	2	(A)14	14	TGGAACCAGCCCCAAGTTTT	60.032	20	GGAACCAGCCCCAAGTTTTT	58.872	20	177	Glycine, serine and threonine metabolism; Glyoxylate and dicarboxylate metabolism; One carbon pool by folate	Amino acid metabolism; Carbohydrate metabolism; Metabolism of cofactors and vitamins
T01-03_TRINITY_DN26425_c0_g1_i2	1	(T)12	12	TGGAACCAGCCCCAAGTTTT	60.032	20	TGGAACCAGCCCCAAGTTTT	60.032	20	178	Glycine, serine and threonine metabolism; Glyoxylate and dicarboxylate metabolism; One carbon pool by folate	Amino acid metabolism; Carbohydrate metabolism; Metabolism of cofactors and vitamins
T01-03_TRINITY_DN26425_c0_g1_i2	2	(A)14	14	TGGAACCAGCCCCAAGTTTT	60.032	20	TGGAACCAGCCCCAAGTTTT	60.032	20	178	Glycine, serine and threonine metabolism; Glyoxylate and dicarboxylate metabolism; One carbon pool by folate	Amino acid metabolism; Carbohydrate metabolism; Metabolism of cofactors and vitamins
T01-03_TRINITY_DN26425_c0_g1_i2	1	(AG)8	16	GAGCTGCCATAGACCTCCTC	59.321	20	CTCGATCTGGTGGAGGAACC	59.538	20	256	Glycine, serine and threonine metabolism; Glyoxylate and dicarboxylate metabolism; One carbon pool by folate	Amino acid metabolism; Carbohydrate metabolism; Metabolism of cofactors and vitamins
T01-03_TRINITY_DN2646_c1_g1_i6	1	(A)16	16	GGCGACACACTTTACCATCC	58.916	20	TGCCCATGTTGGACACCAAT	60.179	20	270	Steroid biosynthesis	Lipid metabolism
T01-03_TRINITY_DN2646_c1_g1_i6	1	(T)10	10	CACGCTAAGTCCTGCTAGCA	59.827	20	CCTGGTCCGAGTAAGGTACG	59.263	20	109	Steroid biosynthesis	Lipid metabolism
T01-03_TRINITY_DN2646_c1_g1_i6	1	(CA)7	14	CACACACACACAGAGGCTCT	59.894	20	AAGGCCTGGAAGAATGAGCA	59.299	20	157	Steroid biosynthesis	Lipid metabolism
T01-03_TRINITY_DN26571_c1_g1_i1	1	(A)10	10	TCGCTGCTTTGTGCCTTTTC	59.969	20	GCACATGCAGCTAGTTTCCC	59.547	20	146	Citrate cycle (TCA cycle); Oxidative phosphorylation	Carbohydrate metabolism; Energy metabolism
T01-03_TRINITY_DN2660_c0_g1_i43	1	(CA)6cgcacacatcccccccact(CA)6	43	CCCCACTCACACACACACAT	60.179	20	ATCTTGGATGGCTGGTGAGC	60.107	20	135	Glycolysis / Gluconeogenesis; Pentose and glucuronate interconversions; Fructose and mannose metabolism; Galactose metabolism; Glycerolipid metabolism; Folate biosynthesis; Caprolactam degradation	Carbohydrate metabolism; Lipid metabolism; Metabolism of cofactors and vitamins; Xenobiotics biodegradation and metabolism
T01-03_TRINITY_DN26721_c1_g4_i1	1	(A)10	10	TGAGGAAACATCTTCACTTGTGA	57.965	23	ACAGAGTCAACACCAGTACGT	58.97	21	232	Purine metabolism; Pyrimidine metabolism	Nucleotide metabolism
T01-03_TRINITY_DN2682_c1_g1_i8	1	(AT)7	14	GGGAGTTGTATTTCCAAGCACC	59.508	22	AGTCGGGTCATCTTCGCATC	59.897	20	102	Vitamin B6 metabolism	Metabolism of cofactors and vitamins
T01-03_TRINITY_DN26843_c0_g1_i1	1	(ATG)5	15	TTCACAAAGCCGATCCCATT	57.786	20	AGGTGTCAAGCCTTTGATGA	57.043	20	122	Flavonoid biosynthesis	Biosynthesis of other secondary metabolites
T01-03_TRINITY_DN2686_c0_g3_i1	1	(A)11	11	GGTTGGTTATCTCGACCTCCC	59.862	21	ATTTCGGGGAAAACTTGGCG	59.399	20	173	Pyruvate metabolism	Carbohydrate metabolism
T01-03_TRINITY_DN2686_c0_g5_i1	1	(T)11	11	ATTTCGGGGAAAACTTGGCG	59.399	20	GGTTGGTTATCTCGACCTCCC	59.862	21	173	Pyruvate metabolism	Carbohydrate metabolism
T01-03_TRINITY_DN269_c0_g2_i2	1	(AT)7gtatgcatgtatgtatgtaccttaaaagtttagc(A)11	59	TTGACCCCTTGCTTGCCTAG	59.962	20	AGTCACATTTACTAGATGGCCACT	59.529	24	129	Glycerophospholipid metabolism	Lipid metabolism
T01-03_TRINITY_DN269_c0_g2_i2	2	(A)16	16	TTGACCCCTTGCTTGCCTAG	59.962	20	AGTCACATTTACTAGATGGCCACT	59.529	24	129	Glycerophospholipid metabolism	Lipid metabolism
T01-03_TRINITY_DN269_c0_g2_i2	1	(A)11	11	AGTGGCCATCTAGTAAATGTGACT	59.529	24	TCCATCTCATAGTGCAAACATCCA	60.08	24	207	Glycerophospholipid metabolism	Lipid metabolism
T01-03_TRINITY_DN269_c0_g2_i2	2	(A)16	16	AGTGGCCATCTAGTAAATGTGACT	59.529	24	TCCATCTCATAGTGCAAACATCCA	60.08	24	207	Glycerophospholipid metabolism	Lipid metabolism
T01-03_TRINITY_DN269_c0_g2_i2	1	(A)11	11	ACGGGAGTCAGTTTTGATGGT	59.58	21	CACCCAGTACCTCAATCCATGT	59.76	22	106	Glycerophospholipid metabolism	Lipid metabolism
T01-03_TRINITY_DN269_c0_g2_i2	1	(TTA)5	15	ACACCATCGTACATCCTGCTC	59.863	21	TTGGTCCTTCCCTTCTGCTC	59.307	20	269	Glycerophospholipid metabolism	Lipid metabolism
T01-03_TRINITY_DN2701_c2_g1_i1	1	(CAT)8	24	ACTTCCCTCAATGGCTGCAA	59.887	20	GAAGACTGAGAGTGGTGGCC	60.037	20	225	Terpenoid backbone biosynthesis	Metabolism of terpenoids and polyketides
T01-03_TRINITY_DN2702_c0_g1_i5	1	(A)16	16	TCGTGACTACAGTGGTTGTGG	59.932	21	CCCCATTTTGAGTCTGCTTTCC	59.768	22	164	Glycerophospholipid metabolism	Lipid metabolism
T01-03_TRINITY_DN2705_c6_g1_i1	1	(A)11	11	TGGATGAGGTCTGCAGCATG	60.107	20	TGGGGTGTATGAAAGAGTGCT	59.015	21	170	Glycine, serine and threonine metabolism; Valine, leucine and isoleucine degradation; Glycolysis / Gluconeogenesis; Citrate cycle (TCA cycle); Pyruvate metabolism; Glyoxylate and dicarboxylate metabolism; Propanoate metabolism	Amino acid metabolism; Carbohydrate metabolism
T01-03_TRINITY_DN2706_c0_g3_i2	1	(T)10	10	TCAGAGTTGCTTGGCTGAGC	60.605	20	ATCCTGTGCTGCTGCTTGAA	60.251	20	106	Citrate cycle (TCA cycle); Glyoxylate and dicarboxylate metabolism; Carbon fixation pathways in prokaryotes	Carbohydrate metabolism; Energy metabolism
T01-03_TRINITY_DN27068_c0_g1_i2	1	(A)14	14	CAGAGCCTGAAAGCCGAGAA	60.037	20	ATCTGGGGCCATCATTTGGG	60.105	20	263	Lysine degradation	Amino acid metabolism
T01-03_TRINITY_DN2723_c0_g1_i4	1	(A)10	10	GGCAAGGACCAAGGAGTGTT	60.179	20	TGCCTTGTCCAAGTCATGTGT	60.134	21	258	Oxidative phosphorylation	Energy metabolism
T01-03_TRINITY_DN2724_c0_g1_i1	1	(CT)6cgggaatcagaaaaacaaaaatcataaccgccagac(AG)6	60	GGTTCCGCCATGATCGATCT	59.966	20	GGTTCCGCCATGATCGATCT	59.966	20	149	Glycolysis / Gluconeogenesis; Pentose phosphate pathway; Fructose and mannose metabolism; Methane metabolism; Carbon fixation in photosynthetic organisms	Carbohydrate metabolism; Energy metabolism
T01-03_TRINITY_DN27374_c0_g1_i1	1	(AG)6	12	AGAGAGCAACAGCAGCACAT	59.964	20	AAGAGGGGTGGCAATGGAAG	59.96	20	194	Cysteine and methionine metabolism	Amino acid metabolism
T01-03_TRINITY_DN275_c0_g1_i1	1	(T)10	10	TGGGTCGATGAGAGAGTCGT	60.035	20	GGCCTTTCATCATTTGACTCGA	58.99	22	251	Pentose phosphate pathway	Carbohydrate metabolism
T01-03_TRINITY_DN275_c0_g1_i1	1	(A)10	10	AGCGAGTATTGGGTTCTTGCA	59.997	21	TGAACTACGACCTCGAGCTG	59.197	20	170	Pentose phosphate pathway	Carbohydrate metabolism
T01-03_TRINITY_DN27672_c1_g1_i1	1	(A)10tataattaaatcaagtaaaaaattattcaaaaaaag(A)10	56	ATGTCTCCATCGCAGGTGTG	60.108	20	AGCAACGGTTCTGAACGTCT	59.896	20	233	Pentose phosphate pathway; Carbon fixation in photosynthetic organisms	Carbohydrate metabolism; Energy metabolism
T01-03_TRINITY_DN27672_c1_g1_i1	1	(T)10ctttttttgaataattttttacttgatttaattata(T)10	56	AGCAACGGTTCTGAACGTCT	59.896	20	ATGTCTCCATCGCAGGTGTG	60.108	20	233	Pentose phosphate pathway; Carbon fixation in photosynthetic organisms	Carbohydrate metabolism; Energy metabolism
T01-03_TRINITY_DN2771_c0_g1_i1	1	(A)11	11	AAGCTCTGCCCACCAAATCC	60.613	20	AGTGTTGAATCCTATGGCCCG	60.134	21	204	Pentose phosphate pathway; Pentose and glucuronate interconversions; Carbon fixation in photosynthetic organisms	Carbohydrate metabolism; Energy metabolism
T01-03_TRINITY_DN2772_c0_g2_i1	1	(GT)6	12	TTACTCAGAAGGCTGGAGGC	59.095	20	GGTCACCTATTGGGAGCAGC	60.465	20	223	Fatty acid biosynthesis; Biotin metabolism	Lipid metabolism; Metabolism of cofactors and vitamins
T01-03_TRINITY_DN27743_c0_g1_i11	1	(A)10	10	TATGGGACTCCCTGCATGTG	59.161	20	GTTTCTTCCTTCTGGCTACATGC	59.872	23	99	Terpenoid backbone biosynthesis	Metabolism of terpenoids and polyketides
T01-03_TRINITY_DN2775_c0_g2_i15	1	(CTT)5	15	TTGACGACGTTGTTCCTCGT	59.899	20	GGCAGCAACAAGAAGCGAAA	59.969	20	191	Purine metabolism; Pyrimidine metabolism	Nucleotide metabolism
T01-03_TRINITY_DN27788_c1_g2_i1	1	(T)10	10	TTCCTCTCGCTCTAGGCCTT	60.033	20	CTCAGCTGCAAGGAACCTCA	59.964	20	150	Starch and sucrose metabolism	Carbohydrate metabolism
T01-03_TRINITY_DN27839_c0_g1_i1	1	(TA)8	16	AAGGGTGCGCAGTTTAAGGA	59.89	20	ATGCGAAGGTTGGAGAGTCC	59.749	20	174	Nicotinate and nicotinamide metabolism	Metabolism of cofactors and vitamins
T01-03_TRINITY_DN27840_c0_g1_i5	1	(T)14	14	TCGTTGGAATTACAAAGCGCA	59.126	21	CCGACATCCCCCTCTTTCTC	59.534	20	99	Arginine biosynthesis	Amino acid metabolism
T01-03_TRINITY_DN27962_c0_g1_i1	1	(TCT)6	18	GTGAGATTGATGGAGCCCTGT	59.789	21	TTGGTTAGGCTGGGTTGACC	59.888	20	242	Phenylpropanoid biosynthesis	Biosynthesis of other secondary metabolites
T01-03_TRINITY_DN2801_c1_g1_i1	1	(A)15	15	CTTCACCCACCACCACTACC	59.964	20	AGAGCGAACCCATGAAGGTG	60.036	20	103	Glycine, serine and threonine metabolism; Glyoxylate and dicarboxylate metabolism	Amino acid metabolism; Carbohydrate metabolism
T01-03_TRINITY_DN2808_c0_g1_i2	1	(T)17	17	TTCTCTCCCTCACCAAACGC	59.965	20	TGAGGATCGACAGGACCCAT	60.032	20	197	Arachidonic acid metabolism	Lipid metabolism
T01-03_TRINITY_DN2815_c0_g1_i2	1	(T)10	10	TCACCCAAACCCAGAAACCC	60.106	20	TGAAGAGGTGATGGTGGAGGA	60.203	21	272	Glycerophospholipid metabolism; Ether lipid metabolism	Lipid metabolism
T01-03_TRINITY_DN2815_c0_g1_i2	1	(ACC)5	15	CACAACCCTCTGCTCCAAGT	59.891	20	AGCCGAGTGGGGAAATTGAG	60.035	20	205	Glycerophospholipid metabolism; Ether lipid metabolism	Lipid metabolism
T01-03_TRINITY_DN2815_c0_g1_i2	1	(T)10	10	CCCATGGCTACCAATCTACCG	60.271	21	GCCAACCAGTTCTTGACGGA	60.534	20	150	Glycerophospholipid metabolism; Ether lipid metabolism	Lipid metabolism
T01-03_TRINITY_DN282_c0_g1_i1	1	(A)11	11	GGCAATCAAACACCACTGCC	60.32	20	GGTTTACGGACCTGAGGCAA	59.964	20	245	Citrate cycle (TCA cycle); Carbon fixation pathways in prokaryotes	Carbohydrate metabolism; Energy metabolism
T01-03_TRINITY_DN2821_c0_g1_i1	1	(ATC)5	15	CTTCTTCGTCAAGCGGCTTC	59.56	20	CAAATCGGAAACCAAGCCCG	60.109	20	186	Glutathione metabolism	Metabolism of other amino acids
T01-03_TRINITY_DN283_c0_g1_i4	1	(TGG)5	15	TCTGCACTTAGAGCCCTTGC	60.036	20	ACGAATACCACCACCACCAC	59.964	20	156	Peptidoglycan biosynthesis	Glycan biosynthesis and metabolism
T01-03_TRINITY_DN2843_c0_g1_i11	1	(CT)8	16	GGATCGAAACAGGCCCTTCT	59.747	20	CAACCTGGTAGAAGGGCCTG	60.035	20	124	Pyrimidine metabolism	Nucleotide metabolism
T01-03_TRINITY_DN2843_c0_g1_i11	1	(T)18	18	TCGAGATTTGGCTGTTTGAGT	57.874	21	ACCTCTGGCCTTCAAACCAA	59.444	20	171	Pyrimidine metabolism	Nucleotide metabolism
T01-03_TRINITY_DN2843_c0_g1_i11	1	(T)13	13	GCAATTTCAAAGGAAGGAAGAATGC	59.879	25	TGATGCCTACCTTAACCAAATCA	57.814	23	107	Pyrimidine metabolism	Nucleotide metabolism
T01-03_TRINITY_DN2843_c0_g1_i11	2	(G)10	10	GCAATTTCAAAGGAAGGAAGAATGC	59.879	25	TGATGCCTACCTTAACCAAATCA	57.814	23	107	Pyrimidine metabolism	Nucleotide metabolism
T01-03_TRINITY_DN2843_c0_g1_i11	1	(T)12	12	TGATTTGGTTAAGGTAGGCATCA	57.814	23	GCAGTGTCAGCCAAGCAATC	60.109	20	215	Pyrimidine metabolism	Nucleotide metabolism
T01-03_TRINITY_DN2843_c0_g1_i11	2	(G)10	10	TGATTTGGTTAAGGTAGGCATCA	57.814	23	GCAGTGTCAGCCAAGCAATC	60.109	20	215	Pyrimidine metabolism	Nucleotide metabolism
T01-03_TRINITY_DN2843_c0_g1_i11	1	(T)13	13	TGGCACTGTTGGATCGAAGA	59.315	20	GCCTTGAGAGGGCTGAAGTT	59.963	20	193	Pyrimidine metabolism	Nucleotide metabolism
T01-03_TRINITY_DN2856_c0_g1_i1	1	(A)11	11	TTGGAGGGATGGCTGGTCTA	59.956	20	AGCCTGCATTTAAGTCTTCCGA	60.027	22	279	Oxidative phosphorylation	Energy metabolism
T01-03_TRINITY_DN287_c0_g2_i4	1	(T)12	12	GCGATGGTAATATGGAGGGCA	59.997	21	GCGCCATCTAAGAAGCTTGG	59.34	20	101	Tyrosine metabolism; Styrene degradation	Amino acid metabolism; Xenobiotics biodegradation and metabolism
T01-03_TRINITY_DN287_c1_g1_i22	1	(A)11	11	GTTCAAACCCCCTTGACCCA	60.106	20	AGGGGATGAATTTCATGCTTCCT	60.052	23	159	Folate biosynthesis	Metabolism of cofactors and vitamins
T01-03_TRINITY_DN2872_c2_g1_i1	1	(GAA)6	18	TGAGTGGATTTGGCGAGCTT	59.963	20	CCAGCTCGTTGTCACAGTCT	59.967	20	268	Glycine, serine and threonine metabolism; Vitamin B6 metabolism	Amino acid metabolism; Metabolism of cofactors and vitamins
T01-03_TRINITY_DN28764_c1_g1_i1	1	(TTA)5	15	GCTCTCCGGAGTCCAAACTT	59.678	20	ACGAATGCCTTTCCCCTTGT	59.888	20	206	Oxidative phosphorylation	Energy metabolism
T01-03_TRINITY_DN2877_c1_g1_i1	1	(T)10	10	AGTCTTGAAAGGTGTGCTCCA	59.51	21	ACCCCCATAAGACCAACCCA	60.479	20	259	Pyrimidine metabolism	Nucleotide metabolism
T01-03_TRINITY_DN2893_c1_g1_i1	1	(T)10	10	AGTACACCCAATGCACAGCA	59.89	20	GTGTTGGGGGAGACAGTAGC	60.036	20	198	Amino sugar and nucleotide sugar metabolism	Carbohydrate metabolism
T01-03_TRINITY_DN2894_c0_g1_i30	1	(AG)20gatgtggtgcttcagtgcttgagttcgtcagtttggtatcttttttttg(A)12	101	TGTGGTGCTTCAGTGCTTGA	60.107	20	TCTCCATGAGGGGATCAGCA	60.031	20	120	Starch and sucrose metabolism	Carbohydrate metabolism
T01-03_TRINITY_DN29089_c0_g1_i2	1	(A)23	23	CCGCTCTAGAAACACCCAGT	59.391	20	ACGTGAGCTTAACCACTCTGT	59.313	21	156	Glycine, serine and threonine metabolism; Valine, leucine and isoleucine degradation; Lysine degradation; Arginine and proline metabolism; Histidine metabolism; Tryptophan metabolism; Glycolysis / Gluconeogenesis; Ascorbate and aldarate metabolism; Pyruvate metabolism; Fatty acid degradation; Glycerolipid metabolism; beta-Alanine metabolism	Amino acid metabolism; Carbohydrate metabolism; Lipid metabolism; Metabolism of other amino acids
T01-03_TRINITY_DN2910_c0_g1_i2	1	(T)10	10	CCACCCCACCTCTCTACACA	60.544	20	AGAGCCATAATGCCTCTTGGA	58.87	21	266	Histidine metabolism	Amino acid metabolism
T01-03_TRINITY_DN2924_c0_g1_i21	1	(A)12	12	TGCCGGTGTCACTTGAAGTT	60.107	20	TCGGAGAATTTTGTCAACTATGCT	58.754	24	121	Galactose metabolism	Carbohydrate metabolism
T01-03_TRINITY_DN29318_c0_g1_i1	1	(A)10	10	AATACAGCGACTCAAGCCCA	59.387	20	AAGCCTTGGTCCTCGCTAAC	60.036	20	100	Cysteine and methionine metabolism; Sulfur metabolism; Selenocompound metabolism	Amino acid metabolism; Energy metabolism; Metabolism of other amino acids
T01-03_TRINITY_DN29318_c0_g1_i1	2	(A)13	13	AATACAGCGACTCAAGCCCA	59.387	20	AAGCCTTGGTCCTCGCTAAC	60.036	20	100	Cysteine and methionine metabolism; Sulfur metabolism; Selenocompound metabolism	Amino acid metabolism; Energy metabolism; Metabolism of other amino acids
T01-03_TRINITY_DN2933_c0_g1_i1	1	(C)11	11	GTTGCAGAGAAGGCCCTTGA	60.251	20	GGGGGAGGAGATTCTGCTTA	58.192	20	142	Riboflavin metabolism	Metabolism of cofactors and vitamins
T01-03_TRINITY_DN2958_c1_g1_i1	1	(T)15	15	ACCCCCAACATGACAATGCC	60.904	20	CCCCTTGTACCAACCCCAAT	59.588	20	176	Selenocompound metabolism	Metabolism of other amino acids
T01-03_TRINITY_DN2959_c0_g1_i3	1	(A)10	10	CGAAGATTGAGAAGACCTGCCT	60.094	22	TCTCTAGCCATTTTGCCCGA	59.091	20	103	N-Glycan biosynthesis; Various types of N-glycan biosynthesis	Glycan biosynthesis and metabolism
T01-03_TRINITY_DN2960_c0_g1_i4	1	(A)13	13	GGATGTCGAGACCTTTGGCA	60.036	20	GCTGGGACCAGGCAAGTATT	60.034	20	266	Arginine and proline metabolism; beta-Alanine metabolism	Amino acid metabolism; Metabolism of other amino acids
T01-03_TRINITY_DN29783_c0_g1_i1	1	(TTG)5	15	AGCAGTTAAGCAGTTTTTGGGA	58.704	22	TGAGTCAGTGATTTCTGTATGCA	57.849	23	107	Porphyrin metabolism	Metabolism of cofactors and vitamins
T01-03_TRINITY_DN29854_c0_g1_i2	1	(CT)8	16	AGCAAAGGACAAGCAGCTGA	60.179	20	GAGAGTACCTTCACCACAAGGA	59.102	22	99	Amino sugar and nucleotide sugar metabolism	Carbohydrate metabolism
T01-03_TRINITY_DN2986_c0_g1_i4	1	(AT)6	12	ACAGGAGTCCATCGAATTGGA	58.812	21	TCGCAATAGTTGGTTGGTCA	57.447	20	208	Glycolysis / Gluconeogenesis; Pentose phosphate pathway; Fructose and mannose metabolism; Methane metabolism; Carbon fixation in photosynthetic organisms	Carbohydrate metabolism; Energy metabolism
T01-03_TRINITY_DN2986_c0_g1_i4	1	(A)11	11	CCAACCAACTATTGCGATACAGA	58.812	23	TTGTGCTTGGTTGGATTCGA	58.026	20	269	Glycolysis / Gluconeogenesis; Pentose phosphate pathway; Fructose and mannose metabolism; Methane metabolism; Carbon fixation in photosynthetic organisms	Carbohydrate metabolism; Energy metabolism
T01-03_TRINITY_DN2987_c1_g3_i1	1	(A)10	10	ACTTTGTATCCTGCAGCCCA	59.302	20	CAGCTGAAATCCGTTGTGGC	60.11	20	169	Pyrimidine metabolism; Drug metabolism - other enzymes	Nucleotide metabolism; Xenobiotics biodegradation and metabolism
T01-03_TRINITY_DN29999_c0_g1_i4	1	(A)11	11	TAATTATGGTGGACGGGCGG	59.893	20	TGCACATCCCACATCAGACT	59.013	20	187	Cysteine and methionine metabolism	Amino acid metabolism
T01-03_TRINITY_DN3004_c0_g1_i4	1	(T)17	17	ACAGAGTCAAACGCTCACCT	59.247	20	TGTTCACTGTGGAGGTGGTC	59.532	20	123	Glycerophospholipid metabolism; Ether lipid metabolism	Lipid metabolism
T01-03_TRINITY_DN3004_c0_g1_i4	1	(T)13	13	AGCTCCATGGGCCATTTCAA	59.958	20	TGGTGTTCCTGCAGGTTTCT	59.449	20	198	Glycerophospholipid metabolism; Ether lipid metabolism	Lipid metabolism
T01-03_TRINITY_DN3009_c1_g1_i9	1	(TTTA)6(T)16	40	CACCGCTACAGTGACTTCCA	59.683	20	CAATGCATGTCGGTCGAACC	59.903	20	230	Cyanoamino acid metabolism	Metabolism of other amino acids
T01-03_TRINITY_DN3009_c1_g1_i9	1	(AG)6	12	CCTTACGTCTTGGGAGGCAA	59.676	20	CGGAAAAGCCTGCAACTTCC	60.039	20	209	Cyanoamino acid metabolism	Metabolism of other amino acids
T01-03_TRINITY_DN3009_c1_g1_i9	1	(A)10	10	GTTGACAAAGAGCCTCAACCA	58.702	21	TGTTGGAGCCCAAAACCCAA	60.326	20	206	Cyanoamino acid metabolism	Metabolism of other amino acids
T01-03_TRINITY_DN3009_c1_g1_i9	1	(T)10	10	TTACAGTGGGAGCACTTGCC	60.251	20	TGTGGGGATGAACAAGGGTG	59.888	20	162	Cyanoamino acid metabolism	Metabolism of other amino acids
T01-03_TRINITY_DN3022_c1_g1_i1	1	(AG)6	12	CGAACCCATATGCATTGGCC	59.685	20	TCTCTCATGGGTTCTCTCCTCA	59.687	22	139	Fatty acid biosynthesis	Lipid metabolism
T01-03_TRINITY_DN3026_c0_g1_i17	1	(A)11	11	CATGAGGGGGTATTTGCAGGA	59.785	21	GTGTGTGTGACCCTTTTTGCA	59.796	21	104	Purine metabolism; Pyrimidine metabolism	Nucleotide metabolism
T01-03_TRINITY_DN3026_c0_g1_i17	1	(A)10	10	CAGGGCATATGGAGTTCACGT	60.134	21	TCTCCATGAGCCCGTATGGT	60.399	20	180	Purine metabolism; Pyrimidine metabolism	Nucleotide metabolism
T01-03_TRINITY_DN3033_c2_g1_i7	1	(T)10	10	CCTCTCCGGCTGATGTTACTC	59.932	21	GGAGAAAGAGGATGAGCACCC	60.134	21	279	Starch and sucrose metabolism	Carbohydrate metabolism
T01-03_TRINITY_DN3033_c2_g1_i7	1	(T)10	10	TTTTTGGGTTAGTGTGGGGG	57.91	20	GGAGAAAGAGGATGAGCACCC	60.134	21	128	Starch and sucrose metabolism	Carbohydrate metabolism
T01-03_TRINITY_DN3033_c2_g1_i7	2	(TA)7(GA)8	30	TTTTTGGGTTAGTGTGGGGG	57.91	20	GGAGAAAGAGGATGAGCACCC	60.134	21	128	Starch and sucrose metabolism	Carbohydrate metabolism
T01-03_TRINITY_DN3054_c0_g1_i4	1	(ATA)5	15	TCGCTTACAGATATCCGTGCA	59.321	21	GCAATCTGCATCCAAGGATCT	58.416	21	230	Purine metabolism; Pyrimidine metabolism	Nucleotide metabolism
T01-03_TRINITY_DN3055_c0_g1_i1	1	(T)13	13	CGATTGTGGTCTTGGAGCCT	60.036	20	GCAATGTCCACCTCATCCCA	60.034	20	267	Arginine and proline metabolism; Phenylalanine metabolism; Tryptophan metabolism; Aminobenzoate degradation; Styrene degradation	Amino acid metabolism; Xenobiotics biodegradation and metabolism
T01-03_TRINITY_DN30669_c1_g1_i2	1	(T)13	13	CTGAGACCAACTTGGAGCCG	60.672	20	ATTGGCCCTCGCTTCCTTTT	60.252	20	127	Steroid hormone biosynthesis	Lipid metabolism
T01-03_TRINITY_DN3090_c1_g1_i2	1	(CA)6	12	ACTACCCACACACACACACG	60.179	20	TGGAATCTCCGCTGGTGATG	59.821	20	166	Arginine biosynthesis; Alanine, aspartate and glutamate metabolism; Glyoxylate and dicarboxylate metabolism; Nitrogen metabolism	Amino acid metabolism; Carbohydrate metabolism; Energy metabolism
T01-03_TRINITY_DN3090_c1_g2_i1	1	(T)10	10	GCTCGCTACATTCTCGAGGT	59.617	20	CTTGGATAGGCTTGGGGTCC	59.816	20	230	Arginine biosynthesis; Alanine, aspartate and glutamate metabolism; Glyoxylate and dicarboxylate metabolism; Nitrogen metabolism	Amino acid metabolism; Carbohydrate metabolism; Energy metabolism
T01-03_TRINITY_DN3090_c1_g2_i1	2	(GT)6	12	GCTCGCTACATTCTCGAGGT	59.617	20	CTTGGATAGGCTTGGGGTCC	59.816	20	230	Arginine biosynthesis; Alanine, aspartate and glutamate metabolism; Glyoxylate and dicarboxylate metabolism; Nitrogen metabolism	Amino acid metabolism; Carbohydrate metabolism; Energy metabolism
T01-03_TRINITY_DN3090_c1_g2_i1	1	(T)10	10	GGACCCCAAGCCTATCCAAG	59.816	20	CGCCAGCTCCATTCCAATCT	60.465	20	137	Arginine biosynthesis; Alanine, aspartate and glutamate metabolism; Glyoxylate and dicarboxylate metabolism; Nitrogen metabolism	Amino acid metabolism; Carbohydrate metabolism; Energy metabolism
T01-03_TRINITY_DN3090_c1_g2_i1	2	(GT)6	12	GGACCCCAAGCCTATCCAAG	59.816	20	CGCCAGCTCCATTCCAATCT	60.465	20	137	Arginine biosynthesis; Alanine, aspartate and glutamate metabolism; Glyoxylate and dicarboxylate metabolism; Nitrogen metabolism	Amino acid metabolism; Carbohydrate metabolism; Energy metabolism
T01-03_TRINITY_DN3112_c0_g2_i13	1	(T)13	13	AGCGTTCACTTAGGCAAAACT	58.428	21	TCAGTTTGAGCAAGTGAGCA	57.67	20	279	Amino sugar and nucleotide sugar metabolism	Carbohydrate metabolism
T01-03_TRINITY_DN3112_c0_g2_i13	1	(T)12	12	CCTCAATGGGGTTGACACGA	59.964	20	AAGGGTACTTGAGGCTTTGCC	60.548	21	274	Amino sugar and nucleotide sugar metabolism	Carbohydrate metabolism
T01-03_TRINITY_DN3112_c0_g3_i1	1	(A)10	10	AAGGGTACTTGAGGCTTTGCC	60.548	21	GTGGATATGGGTTTGGGGCA	60.033	20	276	Amino sugar and nucleotide sugar metabolism	Carbohydrate metabolism
T01-03_TRINITY_DN3112_c0_g3_i1	1	(A)10	10	CTGGTATGGAGATGACCCACG	59.931	21	TCTTGGGTGAGGTACGGCTA	59.96	20	99	Amino sugar and nucleotide sugar metabolism	Carbohydrate metabolism
T01-03_TRINITY_DN3112_c0_g3_i1	1	(A)12	12	GCACACAAAGGACGAAAGAACA	59.903	22	CACAACTTTGGTGGGCTTGG	59.895	20	150	Amino sugar and nucleotide sugar metabolism	Carbohydrate metabolism
T01-03_TRINITY_DN31297_c1_g1_i1	1	(T)10	10	ACCATGGATTGTGACCCATCC	60.064	21	GAGAGATTCGATGCCACGCA	60.528	20	176	Steroid biosynthesis	Lipid metabolism
T01-03_TRINITY_DN3136_c0_g1_i23	1	(AT)6	12	TACAACCCATGTCGCCCAAA	59.889	20	CCTTGCCAAAGTTGTGGTGG	59.895	20	217	Terpenoid backbone biosynthesis	Metabolism of terpenoids and polyketides
T01-03_TRINITY_DN3136_c0_g1_i23	1	(GAA)5	15	AGGGTTTGATGTTGGGTGGA	59.143	20	GAGGGAGAGAGATGGGAAGGA	59.781	21	196	Terpenoid backbone biosynthesis	Metabolism of terpenoids and polyketides
T01-03_TRINITY_DN3136_c0_g2_i1	1	(TA)9	18	AGCTGTTCTTGAGCGTTGGA	59.893	20	GGCAACAATACTCCGGACTTC	58.992	21	155	Terpenoid backbone biosynthesis	Metabolism of terpenoids and polyketides
T01-03_TRINITY_DN3136_c0_g2_i1	2	(A)17	17	AGCTGTTCTTGAGCGTTGGA	59.893	20	GGCAACAATACTCCGGACTTC	58.992	21	155	Terpenoid backbone biosynthesis	Metabolism of terpenoids and polyketides
T01-03_TRINITY_DN3147_c2_g1_i1	1	(A)16	16	CCAAACATGCCCACATACCC	59.177	20	GGGGTTCCCTGACTCAGTGA	60.836	20	198	Glycolysis / Gluconeogenesis; Galactose metabolism	Carbohydrate metabolism
T01-03_TRINITY_DN3147_c2_g1_i1	1	(T)14	14	GGCACCCCAATTAGTGAGCT	60.034	20	TGAGAGTTGAGACCCTCTTCTCT	59.925	23	255	Glycolysis / Gluconeogenesis; Galactose metabolism	Carbohydrate metabolism
T01-03_TRINITY_DN31480_c0_g1_i1	1	(T)10	10	GCCAAACTACAGGGGGTCAA	59.888	20	AGGCTCTTCATTCTCCCCCT	59.955	20	170	Terpenoid backbone biosynthesis	Metabolism of terpenoids and polyketides
T01-03_TRINITY_DN3149_c1_g1_i9	1	(GA)12	24	TGTGTGCGCATGAGAGAGAG	60.109	20	GGAATGGTGCCTTGGAGACA	59.962	20	128	N-Glycan biosynthesis; Various types of N-glycan biosynthesis	Glycan biosynthesis and metabolism
T01-03_TRINITY_DN3159_c0_g1_i5	1	(T)10	10	TGTACCTGCACTTGACGCTT	59.894	20	GGTCCCTTTAACCCCAGCTT	59.592	20	103	Lysine degradation	Amino acid metabolism
T01-03_TRINITY_DN317_c0_g1_i31	1	(T)10	10	TCTCCTGCTCTTTTGGACCT	58.265	20	TGGGTCAAAAATCTGAAAACCCC	59.61	23	182	Streptomycin biosynthesis; Inositol phosphate metabolism	Biosynthesis of other secondary metabolites; Carbohydrate metabolism
T01-03_TRINITY_DN318_c2_g1_i1	1	(AAT)6	18	ACCTACAGCTATGGCCCTGA	60.031	20	GGGTACTACGTTGTCTTGTCCA	59.703	22	124	Riboflavin metabolism	Metabolism of cofactors and vitamins
T01-03_TRINITY_DN3215_c0_g1_i3	1	(AG)8	16	GGTGGAAGAACCCAACAGCT	60.179	20	CAACCAGATCACGTCCACCA	59.965	20	194	N-Glycan biosynthesis; Various types of N-glycan biosynthesis	Glycan biosynthesis and metabolism
T01-03_TRINITY_DN3219_c0_g1_i9	1	(A)16	16	TTAACACTCTCATCCGGCCC	59.46	20	GGTAGCAGCTGTCGTGGTTA	59.754	20	239	N-Glycan biosynthesis; Various types of N-glycan biosynthesis	Glycan biosynthesis and metabolism
T01-03_TRINITY_DN3223_c1_g3_i2	1	(A)12	12	TGAAAGAATGGCGTTAGACGA	57.693	21	TTGATACTGGGGCAACGTCC	60.036	20	153	Sphingolipid metabolism	Lipid metabolism
T01-03_TRINITY_DN3223_c1_g3_i2	1	(A)10	10	TGCTTTCTCGACTCGACCAT	59.111	20	TCTCCGTGATACTGGTCTGT	57.491	20	141	Sphingolipid metabolism	Lipid metabolism
T01-03_TRINITY_DN3226_c2_g1_i3	1	(GA)6	12	CAGCAAGAGAGACGACAGCA	60.039	20	CAGCAAGAGAGACGACAGCA	60.039	20	278	Purine metabolism; Pyrimidine metabolism	Nucleotide metabolism
T01-03_TRINITY_DN3227_c2_g1_i4	1	(T)18	18	TCCCTGTTTTCTCGAACACAGA	59.567	22	TCACTTTCAGGTAAACTCAACCTT	58.248	24	229	Fatty acid biosynthesis; Fatty acid degradation	Lipid metabolism
T01-03_TRINITY_DN3227_c2_g1_i4	1	(T)10	10	AAATCAGGTTGGTGCCGGAT	59.96	20	CTGCACTTCAACGACACAAGG	60.004	21	168	Fatty acid biosynthesis; Fatty acid degradation	Lipid metabolism
T01-03_TRINITY_DN323_c0_g1_i3	1	(TG)6	12	CTTTCCCCAGCTTGGTCTCC	60.323	20	AGTTCCCTGAGGACCGAGAA	59.885	20	110	Folate biosynthesis	Metabolism of cofactors and vitamins
T01-03_TRINITY_DN3236_c1_g1_i1	1	(AAC)5	15	TACCAGCACAAGCCACAGAG	59.965	20	ATTCCACAAAGGCGCCTAGT	59.672	20	114	Steroid hormone biosynthesis; Cyanoamino acid metabolism	Lipid metabolism; Metabolism of other amino acids
T01-03_TRINITY_DN326_c5_g1_i1	1	(T)11	11	TAGGTGCAGATTCCCCCTCA	59.956	20	TCGCCCCACCGATTTAAGAC	60.108	20	144	Starch and sucrose metabolism	Carbohydrate metabolism
T01-03_TRINITY_DN32634_c0_g1_i23	1	(AT)12	24	AAGGGATGGGATGGCAAAGG	60.032	20	AAGGGATGGGATGGCAAAGG	60.032	20	209	Starch and sucrose metabolism	Carbohydrate metabolism
T01-03_TRINITY_DN3268_c1_g1_i1	1	(A)11	11	AAAAGGAGGTCCGAGGGAAC	59.309	20	CCTTAGGATCAGCCAACATGC	59.048	21	120	Oxidative phosphorylation	Energy metabolism
T01-03_TRINITY_DN3276_c0_g1_i2	1	(ATT)6	18	GTGATCATTCAGCCAATTCAGCA	59.87	23	ACTTCATCTCAACACCCCAAA	57.407	21	149	Steroid biosynthesis	Lipid metabolism
T01-03_TRINITY_DN3276_c0_g1_i2	1	(TG)7	14	TGGTTGTTGGAGTGAAGGGG	59.815	20	GGTAGTCAAGTCAGGAAGGGC	60.066	21	252	Steroid biosynthesis	Lipid metabolism
T01-03_TRINITY_DN32793_c2_g1_i1	1	(AT)6	12	TGTGATTCACAGGTTCCCCA	58.855	20	TATGTCCCTTGAATGCCCCC	59.444	20	135	Fructose and mannose metabolism	Carbohydrate metabolism
T01-03_TRINITY_DN3288_c0_g1_i5	1	(TCA)5	15	ACTGAACTGGAGAGGAGTCA	57.315	20	TCTGATTGTGTAACCATACCCGA	59.23	23	144	Galactose metabolism; Starch and sucrose metabolism	Carbohydrate metabolism
T01-03_TRINITY_DN3289_c0_g2_i15	1	(TTTA)5	20	TCGTTTTAAGGCTATGTGCTCCT	60.055	23	CCGGCGGAGAAGGTACAAAT	60.108	20	141	Phenylalanine, tyrosine and tryptophan biosynthesis	Amino acid metabolism
T01-03_TRINITY_DN3308_c0_g1_i13	1	(T)10	10	ACACCCAATAGAGCAGGAAGC	60.065	21	TTTGCAAGGGGAAGGACTGG	60.179	20	102	Steroid biosynthesis	Lipid metabolism
T01-03_TRINITY_DN3308_c0_g1_i13	1	(GA)6	12	CTTCCTCCGGTCACAACACA	59.894	20	AACCGAAACCACACCCTGTT	60.034	20	159	Steroid biosynthesis	Lipid metabolism
T01-03_TRINITY_DN33194_c0_g2_i1	1	(A)10	10	TCCAGCTGTCACAAGTCAAGA	59.238	21	CCTTCTTGGGAGAGGTGCG	60.079	19	244	Cysteine and methionine metabolism	Amino acid metabolism
T01-03_TRINITY_DN33194_c0_g2_i1	1	(T)10	10	GTCTTCCGCTCCAGCTTTCT	60.037	20	TCGACCCCGATTTTTGGTGA	59.603	20	159	Cysteine and methionine metabolism	Amino acid metabolism
T01-03_TRINITY_DN3328_c0_g1_i32	1	(A)10tacaaaataaaggag(A)10	35	ACCCACCTCGATCTTGTTGAG	59.724	21	CCAGGTACTAGTTGGGTCTCG	59.25	21	129	Purine metabolism	Nucleotide metabolism
T01-03_TRINITY_DN3346_c0_g1_i1	1	(ATG)7	21	CCAACGGATCAGATTTGGGC	59.259	20	ATGGGCTTGTACTCTTGCCT	59.005	20	99	Photosynthesis	Energy metabolism
T01-03_TRINITY_DN335_c0_g1_i13	1	(TTC)5	15	ACTGCAACTTCAGCTCTGCA	60.179	20	AAGCTCTGGAAGAAAGGCCG	60.322	20	175	Prodigiosin biosynthesis; Fatty acid biosynthesis; Biotin metabolism	Biosynthesis of other secondary metabolites; Lipid metabolism; Metabolism of cofactors and vitamins
T01-03_TRINITY_DN3359_c0_g2_i4	1	(T)12	12	ACTAAGCTTGAGGTCTGGTTCT	58.756	22	ACACCAAGCGGTAGTCTACG	59.475	20	119	Fatty acid elongation	Lipid metabolism
T01-03_TRINITY_DN3359_c0_g2_i4	1	(A)13	13	GAGAGGGGCAAAGACTGGTT	59.598	20	CAACAGGCAAGCAGACGTTT	59.618	20	257	Fatty acid elongation	Lipid metabolism
T01-03_TRINITY_DN33630_c0_g1_i1	1	(T)15	15	TCATCATCGTCATCTGACACCA	59.24	22	GGCACCAAGCTTTAGAAATGCT	59.768	22	167	Other types of O-glycan biosynthesis	Glycan biosynthesis and metabolism
T01-03_TRINITY_DN337_c3_g1_i1	1	(TC)12	24	GCCGCACTTCTCTTCCTTCT	60.037	20	ACCAGATGCATCTCTCGCTG	59.896	20	229	Phenylpropanoid biosynthesis	Biosynthesis of other secondary metabolites
T01-03_TRINITY_DN33729_c0_g1_i1	1	(T)13	13	ACAGGTTCGAGGGGTGAGAT	60.252	20	TGATCTTCCTGCAGTTCTTCCT	59.091	22	170	Phenylpropanoid biosynthesis	Biosynthesis of other secondary metabolites
T01-03_TRINITY_DN33729_c0_g1_i1	2	(T)13	13	ACAGGTTCGAGGGGTGAGAT	60.252	20	TGATCTTCCTGCAGTTCTTCCT	59.091	22	170	Phenylpropanoid biosynthesis	Biosynthesis of other secondary metabolites
T01-03_TRINITY_DN33729_c0_g1_i1	1	(T)13	13	AGGAAGAACTGCAGGAAGATCA	59.091	22	ACAGCACACCATCTTCAACA	57.653	20	128	Phenylpropanoid biosynthesis	Biosynthesis of other secondary metabolites
T01-03_TRINITY_DN33729_c0_g1_i1	2	(T)13	13	AGGAAGAACTGCAGGAAGATCA	59.091	22	ACAGCACACCATCTTCAACA	57.653	20	128	Phenylpropanoid biosynthesis	Biosynthesis of other secondary metabolites
T01-03_TRINITY_DN33860_c0_g1_i2	1	(TTA)10	30	TGTCTCGTGCTTGTTAAATTGCT	59.436	23	CGTTTGTCCTCTCTATGGATGGA	59.615	23	216	N-Glycan biosynthesis; Various types of N-glycan biosynthesis	Glycan biosynthesis and metabolism
T01-03_TRINITY_DN3411_c0_g1_i2	1	(A)14	14	GCACAACTAGGATCCCGAGT	59.175	20	TCTCTGTCGATGCTCCTTGC	59.826	20	279	Glycerophospholipid metabolism	Lipid metabolism
T01-03_TRINITY_DN3434_c0_g1_i1	1	(ATC)5	15	TTCCACAGCCACTTCCCTTC	59.89	20	GAGGTACGATTGGAGGCGAG	59.969	20	235	Porphyrin metabolism	Metabolism of cofactors and vitamins
T01-03_TRINITY_DN3434_c0_g2_i1	1	(GAT)5	15	GAGGTACGATTGGAGGCGAG	59.969	20	TTCCACAGCCACTTCCCTTC	59.89	20	235	Porphyrin metabolism	Metabolism of cofactors and vitamins
T01-03_TRINITY_DN3436_c0_g1_i36	1	(T)10	10	TTTGTGTGGATCGACTGCCA	59.892	20	ATTCGGCGTGTTCTGGTTCA	60.25	20	101	Terpenoid backbone biosynthesis	Metabolism of terpenoids and polyketides
T01-03_TRINITY_DN3445_c0_g1_i18	1	(T)14	14	AGCACTATCCGATCGAATAGCT	58.914	22	ATCAAGTGACGGCTGGGATG	60.108	20	112	Phenylpropanoid biosynthesis; Flavonoid biosynthesis; Stilbenoid, diarylheptanoid and gingerol biosynthesis	Biosynthesis of other secondary metabolites
T01-03_TRINITY_DN3445_c0_g1_i18	1	(A)10	10	CGTCACTTGATGCAGAGCCT	60.391	20	TCGATGGAAAACTGCCACGT	60.25	20	191	Phenylpropanoid biosynthesis; Flavonoid biosynthesis; Stilbenoid, diarylheptanoid and gingerol biosynthesis	Biosynthesis of other secondary metabolites
T01-03_TRINITY_DN3445_c0_g1_i18	1	(A)16	16	TCTGCAAGAACAAACAGCGA	58.337	20	TGTCTCTTTGCTCTGCTTGT	57.372	20	110	Phenylpropanoid biosynthesis; Flavonoid biosynthesis; Stilbenoid, diarylheptanoid and gingerol biosynthesis	Biosynthesis of other secondary metabolites
T01-03_TRINITY_DN3445_c0_g1_i18	1	(T)16	16	TGTCTCTTTGCTCTGCTTGT	57.372	20	TCTGCAAGAACAAACAGCGA	58.337	20	110	Phenylpropanoid biosynthesis; Flavonoid biosynthesis; Stilbenoid, diarylheptanoid and gingerol biosynthesis	Biosynthesis of other secondary metabolites
T01-03_TRINITY_DN346_c1_g1_i32	1	(T)10cagtattacgagcttttatcacaactataagggattccttaaacttctgaa(T)10	71	ACGTGTGGAAAACTGCCTTTC	59.596	21	TCAGGCAAATCTGGTTGGTACA	59.893	22	218	Glycolysis / Gluconeogenesis; Pentose phosphate pathway; Fructose and mannose metabolism; Galactose metabolism; Methane metabolism	Carbohydrate metabolism; Energy metabolism
T01-03_TRINITY_DN346_c1_g1_i32	1	(AGC)5	15	CAGGGCCTGGTGATTTCTCA	59.671	20	CCGTCATGGCTGCAGATACT	59.894	20	266	Glycolysis / Gluconeogenesis; Pentose phosphate pathway; Fructose and mannose metabolism; Galactose metabolism; Methane metabolism	Carbohydrate metabolism; Energy metabolism
T01-03_TRINITY_DN346_c1_g1_i32	1	(A)10	10	GGTCTTTGTTGGGACCTGTT	57.933	20	TGGAGACGTGAAGAGGGTGT	60.469	20	187	Glycolysis / Gluconeogenesis; Pentose phosphate pathway; Fructose and mannose metabolism; Galactose metabolism; Methane metabolism	Carbohydrate metabolism; Energy metabolism
T01-03_TRINITY_DN34692_c0_g1_i2	1	(T)12	12	GCGCCCAACATCGTAAACAT	59.55	20	CCTGTAGTGTCAACTCAGTATCCA	59.537	24	236	Purine metabolism	Nucleotide metabolism
T01-03_TRINITY_DN34692_c0_g2_i2	1	(A)10	10	CCTGTAGTGTCAACTCAGTATCCA	59.537	24	GCGCCCAACATCGTAAACAT	59.55	20	234	Purine metabolism	Nucleotide metabolism
T01-03_TRINITY_DN347_c0_g1_i32	1	(A)10	10	CGGCTACTTACCAGACTCCC	59.255	20	GTTCACGTTGTGGCAGCAAA	60.179	20	132	Folate biosynthesis	Metabolism of cofactors and vitamins
T01-03_TRINITY_DN347_c1_g1_i8	1	(AG)8	16	ACCAAACGGGGCCTTACAAA	60.106	20	CCATTTCTCCCCCTTCTGCA	59.667	20	156	Fructose and mannose metabolism; Amino sugar and nucleotide sugar metabolism	Carbohydrate metabolism
T01-03_TRINITY_DN347_c1_g1_i8	1	(A)12	12	TTTACCTCGTCTGCCACCAC	59.966	20	CGTGATGAGAACCAGGTTTGC	59.802	21	218	Fructose and mannose metabolism; Amino sugar and nucleotide sugar metabolism	Carbohydrate metabolism
T01-03_TRINITY_DN349_c0_g2_i1	1	(TC)6ggctgaacgctgacggcgaagtcagtcagcaaaggaagctcaccaaaagaaac(AG)12	89	GGCGGAAGACTTGAAGTCCA	59.965	20	TGGAAAGCATCGCAGTCACT	59.965	20	271	Photosynthesis	Energy metabolism
T01-03_TRINITY_DN3493_c0_g1_i29	1	(AAC)5	15	GGCCCTTTTAGTCGCTCTCA	59.751	20	TGGTGTAGGCCAAGCAACAA	60.106	20	103	Phenylpropanoid biosynthesis; Starch and sucrose metabolism; Cyanoamino acid metabolism; Purine metabolism	Biosynthesis of other secondary metabolites; Carbohydrate metabolism; Metabolism of other amino acids; Nucleotide metabolism
T01-03_TRINITY_DN3494_c0_g1_i6	1	(AG)8	16	TTTCCTTACCGCGTTCAGCT	59.966	20	TTCGCAGAGGATGATGGACG	59.897	20	173	Glycerolipid metabolism	Lipid metabolism
T01-03_TRINITY_DN3496_c0_g1_i1	1	(A)15	15	ACCAGTGCACCACTTCACAA	60.035	20	TCCTGATTTGCTCGTGATCACT	59.765	22	122	Oxidative phosphorylation	Energy metabolism
T01-03_TRINITY_DN3496_c0_g1_i1	1	(T)12cttccttcgcccccaaaatttctagatctctcgttttattgctttggatctgtgttctctgggggcgaaggaag(A)12	98	GATCTGTGTTCTCTGGGGGC	60.107	20	CAGACTCGATGGGGACGATG	59.969	20	178	Oxidative phosphorylation	Energy metabolism
T01-03_TRINITY_DN350_c5_g1_i34	1	(T)10	10	CCAGCAGGCTAAGTTGGTTC	58.831	20	AGGCAAACCACTTAGTGATGAGT	59.927	23	103	Glycosylphosphatidylinositol (GPI)-anchor biosynthesis	Glycan biosynthesis and metabolism
T01-03_TRINITY_DN350_c5_g1_i34	1	(T)10	10	GCAGGTTCATCATGGGTTGC	59.826	20	GAACACGCTGCTGGTGAAAG	60.041	20	173	Glycosylphosphatidylinositol (GPI)-anchor biosynthesis	Glycan biosynthesis and metabolism
T01-03_TRINITY_DN3503_c0_g3_i1	1	(TC)6	12	TCTCTCTCTCTCCCTCGCAC	60.107	20	TGTTCGCAATGCCATGGTTG	60.038	20	244	Ubiquinone and other terpenoid-quinone biosynthesis	Metabolism of cofactors and vitamins
T01-03_TRINITY_DN3503_c0_g3_i1	2	(T)10	10	TCTCTCTCTCTCCCTCGCAC	60.107	20	TGTTCGCAATGCCATGGTTG	60.038	20	244	Ubiquinone and other terpenoid-quinone biosynthesis	Metabolism of cofactors and vitamins
T01-03_TRINITY_DN35048_c0_g1_i3	1	(A)15	15	GGCTCACCATCGCTACTGAT	59.609	20	ACAGGCCCTCATTTGAAGGT	59.22	20	146	Glycerolipid metabolism; Glycerophospholipid metabolism	Lipid metabolism
T01-03_TRINITY_DN35150_c0_g2_i1	1	(TA)7	14	AACAAAACATCTTCTAATCTGCCA	57.101	24	CATGACGAGAGACGAGACCG	59.973	20	173	Fatty acid biosynthesis; Biosynthesis of unsaturated fatty acids	Lipid metabolism
T01-03_TRINITY_DN3542_c1_g1_i1	1	(AG)15	30	TGGGGTTTGTGGAGGTTGAG	59.815	20	AACCACAAGTGTCACGGGTT	60.035	20	171	Inositol phosphate metabolism; Glycerophospholipid metabolism; Ether lipid metabolism	Carbohydrate metabolism; Lipid metabolism
T01-03_TRINITY_DN3583_c0_g1_i5	1	(T)10	10	ACCTGGCAAAGAGAAGGACC	59.598	20	GGGGAGAGGGTAACTTGTGC	60.035	20	155	Sulfur metabolism; Purine metabolism	Energy metabolism; Nucleotide metabolism
T01-03_TRINITY_DN3583_c0_g2_i1	1	(A)11	11	ACTGGGAGAGAGCGATACCA	59.741	20	TCCACCACCTAATTTTGAGGCA	59.891	22	100	Sulfur metabolism; Purine metabolism	Energy metabolism; Nucleotide metabolism
T01-03_TRINITY_DN3587_c0_g1_i2	1	(A)11	11	CCAGGAACAGAAGCCATGCT	60.323	20	CAGATCTGAACACAGTTGTTTCCA	59.424	24	179	Alanine, aspartate and glutamate metabolism; Nitrogen metabolism	Amino acid metabolism; Energy metabolism
T01-03_TRINITY_DN3587_c0_g1_i2	1	(T)16	16	CGAGCGGACTCTTGTTTCCA	60.32	20	CCAGGAACAGAAGCCATGCT	60.323	20	177	Alanine, aspartate and glutamate metabolism; Nitrogen metabolism	Amino acid metabolism; Energy metabolism
T01-03_TRINITY_DN35884_c0_g1_i7	1	(T)15	15	TGGTGGTATGGGGCTTTTGT	59.515	20	TCCATCACTACCGATCCCCA	59.737	20	171	Glycine, serine and threonine metabolism; Phenylalanine, tyrosine and tryptophan biosynthesis; Benzoxazinoid biosynthesis	Amino acid metabolism; Biosynthesis of other secondary metabolites
T01-03_TRINITY_DN3596_c0_g2_i1	1	(GGT)5	15	TTTGAAGACCCTACACCGCC	59.964	20	CCCTCAAAGACCTCCCGAAC	60.036	20	185	Glycine, serine and threonine metabolism; Lysine degradation	Amino acid metabolism
T01-03_TRINITY_DN3596_c0_g2_i1	1	(TC)6	12	AGCTCCACCAACCACAAACA	60.034	20	CCCACTTGTCCCGATCTCAG	59.823	20	200	Glycine, serine and threonine metabolism; Lysine degradation	Amino acid metabolism
T01-03_TRINITY_DN36038_c0_g2_i3	1	(GA)7	14	TAGGTAGCTGCCAACCAACG	60.037	20	CCAAGGGGAGAGACGTTGAC	60.037	20	105	Pentose and glucuronate interconversions; Galactose metabolism; Starch and sucrose metabolism; Amino sugar and nucleotide sugar metabolism	Carbohydrate metabolism
T01-03_TRINITY_DN362_c0_g1_i9	1	(AG)6	12	TCTGTGTCTCCTCCTCCTCG	60.035	20	GCTCTCGTTCTTCGGCAGAT	60.179	20	111	Amino sugar and nucleotide sugar metabolism	Carbohydrate metabolism
T01-03_TRINITY_DN362_c0_g1_i9	1	(A)10	10	TTGGGCAGTCAGGAAGCATC	60.323	20	GCCCAAACCACTAGCAGACT	59.963	20	164	Amino sugar and nucleotide sugar metabolism	Carbohydrate metabolism
T01-03_TRINITY_DN362_c0_g1_i9	1	(TTG)5	15	GCCCCCAAAAGAACATGCAA	59.604	20	TCCTCCACTCCAGTCTGTCC	60.252	20	100	Amino sugar and nucleotide sugar metabolism	Carbohydrate metabolism
T01-03_TRINITY_DN362_c0_g1_i9	1	(T)12	12	TCCAGTTTCAGCTGAAATCGGA	59.962	22	ACTTAAGATAGGAGGAGATGACGA	58.057	24	226	Amino sugar and nucleotide sugar metabolism	Carbohydrate metabolism
T01-03_TRINITY_DN3636_c0_g2_i1	1	(T)18	18	CCTTACCTTGTGTGGGGCAT	59.96	20	TCCAAAAGGAACCACACCCC	60.106	20	193	Biosynthesis of unsaturated fatty acids	Lipid metabolism
T01-03_TRINITY_DN36436_c0_g1_i1	1	(TCA)5	15	TCGACCTTTCCAATGAGGCA	59.31	20	GTTGTCGGAGAGAGCAAGGA	59.396	20	229	Pyrimidine metabolism	Nucleotide metabolism
T01-03_TRINITY_DN36505_c0_g1_i1	1	(AC)7	14	GCGCATGCACACGTGTATAC	60.315	20	ATGCTGAGGTGCCAAGGATC	60.107	20	201	Glycolysis / Gluconeogenesis; Carbon fixation in photosynthetic organisms	Carbohydrate metabolism; Energy metabolism
T01-03_TRINITY_DN3658_c0_g1_i8	1	(T)10	10	TGCGATTGCTGACAGTGAGA	59.682	20	AACGCTCCTTTCGACTCCTG	60.038	20	162	N-Glycan biosynthesis	Glycan biosynthesis and metabolism
T01-03_TRINITY_DN3658_c0_g1_i8	1	(GTG)5	15	GGGTTCTTGCACTTTCGGGA	60.536	20	TTAGCTGTCCTCCACCACCA	60.473	20	116	N-Glycan biosynthesis	Glycan biosynthesis and metabolism
T01-03_TRINITY_DN3658_c2_g1_i1	1	(T)11	11	AATGCAGCGTAACCTCGACA	60.038	20	CATGATGCCTGAAGGAGGGT	59.45	20	111	N-Glycan biosynthesis	Glycan biosynthesis and metabolism
T01-03_TRINITY_DN3660_c0_g1_i2	1	(T)11	11	TGTCCACCACTAGTTTGCCC	59.89	20	CCGAAGTGAGGTTTCCGTCA	59.967	20	123	Purine metabolism	Nucleotide metabolism
T01-03_TRINITY_DN3697_c1_g2_i1	1	(A)15	15	CAACGTGGCACTCCAACATG	60.04	20	ACTAGGGCGGTGCATTGTTT	60.251	20	100	Cutin, suberine and wax biosynthesis	Lipid metabolism
T01-03_TRINITY_DN3701_c0_g1_i2	1	(A)14	14	ACTCACAAAACGCCCACTACA	60.134	21	TTGATGCCATAGGTGTTGGAA	57.552	21	244	N-Glycan biosynthesis; Various types of N-glycan biosynthesis	Glycan biosynthesis and metabolism
T01-03_TRINITY_DN3709_c0_g1_i9	1	(GA)6	12	GGGGATTTGAAGGGTGGAGG	60.033	20	CGTCACCCTCTCGTCTCAAC	60.11	20	187	Cysteine and methionine metabolism; Citrate cycle (TCA cycle); Pyruvate metabolism; Glyoxylate and dicarboxylate metabolism; Carbon fixation in photosynthetic organisms	Amino acid metabolism; Carbohydrate metabolism; Energy metabolism
T01-03_TRINITY_DN3709_c0_g1_i9	1	(CT)6	12	CGTCACCCTCTCGTCTCAAC	60.11	20	GGGGATTTGAAGGGTGGAGG	60.033	20	187	Cysteine and methionine metabolism; Citrate cycle (TCA cycle); Pyruvate metabolism; Glyoxylate and dicarboxylate metabolism; Carbon fixation in photosynthetic organisms	Amino acid metabolism; Carbohydrate metabolism; Energy metabolism
T01-03_TRINITY_DN3709_c0_g1_i9	1	(A)14	14	TCGCATACAGAATGGGGGAAC	60.134	21	AGACAGTTTCCGTGGTTGGT	59.455	20	99	Cysteine and methionine metabolism; Citrate cycle (TCA cycle); Pyruvate metabolism; Glyoxylate and dicarboxylate metabolism; Carbon fixation in photosynthetic organisms	Amino acid metabolism; Carbohydrate metabolism; Energy metabolism
T01-03_TRINITY_DN3725_c0_g1_i2	1	(T)10	10	CACCCGATGTCCGAACTGAA	60.038	20	TCGGAGGGTATTGGGGTACA	59.661	20	110	Pyrimidine metabolism	Nucleotide metabolism
T01-03_TRINITY_DN374_c1_g1_i8	1	(GAA)6	18	ATCCGTGGTTGCGAAGGATT	60.035	20	GCAAAGCGAGGAGGTTCTCT	60.037	20	134	Terpenoid backbone biosynthesis	Metabolism of terpenoids and polyketides
T01-03_TRINITY_DN374_c1_g1_i8	2	(CTC)6	18	ATCCGTGGTTGCGAAGGATT	60.035	20	GCAAAGCGAGGAGGTTCTCT	60.037	20	134	Terpenoid backbone biosynthesis	Metabolism of terpenoids and polyketides
T01-03_TRINITY_DN3755_c0_g1_i4	1	(A)12	12	TCACTTGGGCAAGAATGGGA	59.223	20	GAGGCTCGTGCGAGTTATGA	59.899	20	107	Starch and sucrose metabolism	Carbohydrate metabolism
T01-03_TRINITY_DN37757_c0_g1_i1	1	(G)10	10	TCACACCACCCCAATTTGGA	59.442	20	TGTTTTTCTGCGAGATGTTGGG	59.707	22	123	Photosynthesis	Energy metabolism
T01-03_TRINITY_DN3790_c0_g2_i1	1	(AG)8	16	GCCTTGAAATCGTTGAAGTCCA	59.448	22	TGGGCTCTCTCTCTCTCTCT	58.405	20	148	Linoleic acid metabolism; alpha-Linolenic acid metabolism	Lipid metabolism
T01-03_TRINITY_DN38_c2_g1_i3	1	(A)10	10	TCCATGTGACCTAAAACCCCT	58.646	21	TCACCAGATGGACCTCTCTGT	59.922	21	131	Steroid biosynthesis	Lipid metabolism
T01-03_TRINITY_DN3814_c0_g1_i2	1	(A)15	15	AGCAACATTACATAGCTCATGGC	59.433	23	TGCTCTGCCAATGAAACCTG	58.75	20	217	Valine, leucine and isoleucine degradation; Butanoate metabolism; Geraniol degradation	Amino acid metabolism; Carbohydrate metabolism; Metabolism of terpenoids and polyketides
T01-03_TRINITY_DN3814_c0_g1_i2	1	(T)10	10	CAGGTTTCATTGGCAGAGCA	58.75	20	GTGAAGTGTTGTTTCGAGGGC	60.003	21	167	Valine, leucine and isoleucine degradation; Butanoate metabolism; Geraniol degradation	Amino acid metabolism; Carbohydrate metabolism; Metabolism of terpenoids and polyketides
T01-03_TRINITY_DN3822_c0_g1_i2	1	(TC)11	22	TCTCCATTCCTTCGACTGGC	59.463	20	TGAGATCGAGAAGGCGAAGG	59.259	20	109	Fatty acid biosynthesis; Fatty acid degradation	Lipid metabolism
T01-03_TRINITY_DN3827_c0_g3_i1	1	(TC)10	20	TGTCTTCGCGAACTCCAGTA	58.759	20	ATCTAGCCATGGCAGCTCTG	59.603	20	100	Purine metabolism	Nucleotide metabolism
T01-03_TRINITY_DN3838_c0_g2_i1	1	(A)10	10	AGGGTTGAACATCATCCGCA	59.672	20	CCCAGCTATTCTTTGGGTCCT	59.434	21	148	Photosynthesis	Energy metabolism
T01-03_TRINITY_DN3852_c2_g1_i1	1	(T)10gtgtgtggcaaaattacttgaagaaccaaaagtgggtcttcaaattatgaccaaaactcacagaattatgagaaaatttacacccaaaaccagc(A)13	117	CCCATGAAGTTGGTGGACCA	59.888	20	AGACCCACTTTTGGTTCTTCA	57.337	21	190	Carotenoid biosynthesis	Metabolism of terpenoids and polyketides
T01-03_TRINITY_DN3866_c0_g1_i31	1	(AT)6	12	AGCTGTGTTGTATGTGCCCA	59.89	20	ACATGGGCTGGAACACACTAG	59.996	21	122	Tryptophan metabolism	Amino acid metabolism
T01-03_TRINITY_DN3866_c0_g1_i31	1	(A)16	16	CCAGAGAACTGAACCTCACACA	59.897	22	TGATCTCCAAGCCTTGTGTGA	59.301	21	215	Tryptophan metabolism	Amino acid metabolism
T01-03_TRINITY_DN3866_c0_g1_i31	1	(GT)10	20	TGTGTGCACGTTACAGCTCT	59.896	20	CGTGGTTGTGTTATTCGGCA	59.131	20	147	Tryptophan metabolism	Amino acid metabolism
T01-03_TRINITY_DN3866_c2_g1_i2	1	(GT)15	30	CTCCTTTCCTTCCCCTGCAA	59.594	20	AGGACACACACACACACACA	59.677	20	107	Glycosaminoglycan degradation	Glycan biosynthesis and metabolism
T01-03_TRINITY_DN3866_c2_g1_i2	2	(ATTG)5	20	CTCCTTTCCTTCCCCTGCAA	59.594	20	AGGACACACACACACACACA	59.677	20	107	Glycosaminoglycan degradation	Glycan biosynthesis and metabolism
T01-03_TRINITY_DN3866_c2_g1_i2	1	(TG)10	20	TGTGTGTGTGTGTGTGTCCT	59.677	20	AGCCATCCTCAATCGTCAGA	58.511	20	257	Glycosaminoglycan degradation	Glycan biosynthesis and metabolism
T01-03_TRINITY_DN3866_c2_g1_i2	2	(ATTG)7	28	TGTGTGTGTGTGTGTGTCCT	59.677	20	AGCCATCCTCAATCGTCAGA	58.511	20	257	Glycosaminoglycan degradation	Glycan biosynthesis and metabolism
T01-03_TRINITY_DN38748_c0_g1_i1	1	(A)15	15	TGGTCAAAATGCTTGGGGGA	59.81	20	TGCCACGTGTCCTTCTACTG	59.683	20	248	Terpenoid backbone biosynthesis	Metabolism of terpenoids and polyketides
T01-03_TRINITY_DN3890_c0_g1_i1	1	(TC)16	32	TGCTCGTTCTCTTGCTCCAT	59.39	20	GGTGGTGCTAATGGGTTCGA	60.036	20	131	Nicotinate and nicotinamide metabolism	Metabolism of cofactors and vitamins
T01-03_TRINITY_DN3890_c0_g1_i1	1	(A)13	13	CTCTCCATTGCCACTCTCCG	60.179	20	CCTTTACTCTGTGGGAGCCG	60.108	20	138	Nicotinate and nicotinamide metabolism	Metabolism of cofactors and vitamins
T01-03_TRINITY_DN3894_c0_g1_i2	1	(CA)8	16	TCAGTCCCCGTTTTGCCTTT	60.106	20	ACCCCCACTCTATGCTCTGA	59.66	20	278	Flavonoid biosynthesis	Biosynthesis of other secondary metabolites
T01-03_TRINITY_DN38950_c0_g1_i1	1	(A)11	11	ACGAAGCGGTACTCAAAAGACA	60.224	22	GCTGCAGCTAAAGTTGTCCG	59.833	20	213	Amino sugar and nucleotide sugar metabolism	Carbohydrate metabolism
T01-03_TRINITY_DN3904_c1_g1_i8	1	(A)17	17	CCTTTTTCGCCCTTTCCAGC	60.038	20	CCAACCTGTTCGTTGTGGGT	60.75	20	264	Glycerolipid metabolism; Glycerophospholipid metabolism	Lipid metabolism
T01-03_TRINITY_DN3904_c1_g1_i8	1	(TG)10	20	TGGTTTGAACTGGTTCGCAG	58.979	20	TGTCCTGGCACAACATCCTC	59.963	20	101	Glycerolipid metabolism; Glycerophospholipid metabolism	Lipid metabolism
T01-03_TRINITY_DN3907_c0_g1_i10	1	(A)11	11	ACCAACAAGTTCCGTGACCA	59.746	20	ATGGCGGAAGGAGAGAGGAT	60.105	20	142	Inositol phosphate metabolism	Carbohydrate metabolism
T01-03_TRINITY_DN3907_c0_g1_i10	1	(T)11	11	GCCATTTCTCCAAGTTCCGC	59.829	20	ACCAACAAGTTCCGTGACCA	59.746	20	176	Inositol phosphate metabolism	Carbohydrate metabolism
T01-03_TRINITY_DN39091_c0_g1_i1	1	(A)17	17	GTCACCCGGAATAACCTGCA	60.036	20	AGTGGGAAGATCGGTTGCAG	60.036	20	221	Ascorbate and aldarate metabolism	Carbohydrate metabolism
T01-03_TRINITY_DN39091_c0_g1_i1	1	(T)17	17	AGTGGGAAGATCGGTTGCAG	60.036	20	GTCACCCGGAATAACCTGCA	60.036	20	221	Ascorbate and aldarate metabolism	Carbohydrate metabolism
T01-03_TRINITY_DN3915_c0_g1_i11	1	(A)11	11	TGGTCTCTCTGATATGCTGCA	58.608	21	ACCAAAATGGGTATCTACCTGTT	57.47	23	148	Cysteine and methionine metabolism	Amino acid metabolism
T01-03_TRINITY_DN3915_c0_g1_i11	1	(A)10	10	CAATTTCGTGGTTTCGCCGA	59.764	20	CCACGAAATTGGAAACAGGCA	59.66	21	145	Cysteine and methionine metabolism	Amino acid metabolism
T01-03_TRINITY_DN3915_c0_g1_i11	2	(A)10	10	CAATTTCGTGGTTTCGCCGA	59.764	20	CCACGAAATTGGAAACAGGCA	59.66	21	145	Cysteine and methionine metabolism	Amino acid metabolism
T01-03_TRINITY_DN3915_c0_g1_i11	1	(A)10	10	CAATTTCGTGGTTTCGCCGA	59.764	20	TGGTGTTTTACGAAAATAGCTATGA	57.091	25	147	Cysteine and methionine metabolism	Amino acid metabolism
T01-03_TRINITY_DN3915_c0_g1_i11	2	(A)10	10	CAATTTCGTGGTTTCGCCGA	59.764	20	TGGTGTTTTACGAAAATAGCTATGA	57.091	25	147	Cysteine and methionine metabolism	Amino acid metabolism
T01-03_TRINITY_DN3915_c0_g1_i11	1	(AT)9	18	CTTACCGGCTAGCTTGCTCA	59.824	20	CCTTTTCAGGCATGGTACATGG	59.572	22	101	Cysteine and methionine metabolism	Amino acid metabolism
T01-03_TRINITY_DN39163_c0_g1_i8	1	(A)17ttcatttgaaaagtgagattctggaagcagagcctc(T)12	65	TGGTGACCTTGGTGTCTTGT	59.084	20	GAGTGGCCTCATACCCAAACA	59.996	21	209	Pentose and glucuronate interconversions	Carbohydrate metabolism
T01-03_TRINITY_DN3925_c1_g1_i1	1	(A)10ttgcatagtctcaaaccaacttatatgactgaaatttcttctgttcctcaattc(T)11aaacaattggtgtatacga(T)10	104	CCATTGATGGTGGTGTGACAG	59.186	21	CGGCCGAATGTTTCACATCC	59.901	20	265	Glycerophospholipid metabolism	Lipid metabolism
T01-03_TRINITY_DN3925_c1_g1_i1	1	(TC)6	12	ACCTCATGGAGCCAAGATGTG	60.065	21	CAGCCCATTCTCTGACAGCA	60.036	20	155	Glycerophospholipid metabolism	Lipid metabolism
T01-03_TRINITY_DN3925_c1_g2_i2	1	(TG)11	22	TGTGTGTGTGTGTGTGTGTG	59.129	20	GTCTGATTTTCGGGATGTGCC	59.598	21	168	Glycerophospholipid metabolism	Lipid metabolism
T01-03_TRINITY_DN3925_c1_g2_i2	1	(A)12	12	AGCCTGTGTGTGTAAGGAGT	58.575	20	TGTTGACTCATCAGCTTAGCTCA	59.741	23	109	Glycerophospholipid metabolism	Lipid metabolism
T01-03_TRINITY_DN3927_c1_g3_i1	1	(T)10	10	GGTACTACCGTGCATCAGGG	59.896	20	ACAACTTGCAGATGCTTTGGG	59.658	21	125	Glycerolipid metabolism; Glycerophospholipid metabolism	Lipid metabolism
T01-03_TRINITY_DN3934_c0_g1_i4	1	(A)16	16	TCTGCCAAACATTATCAACTTCTGA	58.997	25	ACTCCGTTGACAGATGAACTAGT	59.173	23	99	Alanine, aspartate and glutamate metabolism; Pyrimidine metabolism	Amino acid metabolism; Nucleotide metabolism
T01-03_TRINITY_DN395_c2_g1_i2	1	(A)12	12	CAAGGTGTTGGGGCCTAACA	60.179	20	GACTTACAATCGCCAGGCCT	60.108	20	114	Starch and sucrose metabolism	Carbohydrate metabolism
T01-03_TRINITY_DN3956_c2_g1_i1	1	(GA)6ggagttagaggatataaacacaattgtgattaatagaagacatgactttagatagaactgaacagagagataatatacata(TATG)5	113	ACGAAGGCCGATTAGAGTTGT	59.451	21	TTTAGGGCCTCAGAACGCTC	59.751	20	203	Oxidative phosphorylation	Energy metabolism
T01-03_TRINITY_DN3959_c0_g1_i13	1	(GGT)8	24	GAGTGGGTAAGGTGGTGGTG	59.964	20	AGGGTGCAACAAGTAGGGAT	58.627	20	169	Thiamine metabolism	Metabolism of cofactors and vitamins
T01-03_TRINITY_DN3994_c0_g1_i1	1	(CTA)5	15	CTGTGGGCTTAAGGGGTCTG	60.035	20	TACCCAACCGCCCCTTAAAC	59.962	20	173	Photosynthesis	Energy metabolism
T01-03_TRINITY_DN40041_c0_g1_i9	1	(TG)10	20	GTCTACCGAACGCTGTCGAT	59.902	20	TGCGACACATCCAATCTGAA	57.529	20	115	Glutathione metabolism; Metabolism of xenobiotics by cytochrome P450; Drug metabolism - cytochrome P450; Drug metabolism - other enzymes	Metabolism of other amino acids; Xenobiotics biodegradation and metabolism
T01-03_TRINITY_DN40041_c0_g1_i9	2	(A)10	10	GTCTACCGAACGCTGTCGAT	59.902	20	TGCGACACATCCAATCTGAA	57.529	20	115	Glutathione metabolism; Metabolism of xenobiotics by cytochrome P450; Drug metabolism - cytochrome P450; Drug metabolism - other enzymes	Metabolism of other amino acids; Xenobiotics biodegradation and metabolism
T01-03_TRINITY_DN40041_c0_g1_i9	1	(TG)10	20	TGTGTGTGTGTGTGTGTGTG	59.129	20	TAACCCAACGAATCTGCCCC	60.035	20	189	Glutathione metabolism; Metabolism of xenobiotics by cytochrome P450; Drug metabolism - cytochrome P450; Drug metabolism - other enzymes	Metabolism of other amino acids; Xenobiotics biodegradation and metabolism
T01-03_TRINITY_DN40041_c0_g1_i9	2	(A)10	10	TGTGTGTGTGTGTGTGTGTG	59.129	20	TAACCCAACGAATCTGCCCC	60.035	20	189	Glutathione metabolism; Metabolism of xenobiotics by cytochrome P450; Drug metabolism - cytochrome P450; Drug metabolism - other enzymes	Metabolism of other amino acids; Xenobiotics biodegradation and metabolism
T01-03_TRINITY_DN4008_c0_g1_i10	1	(A)10	10	AGTGGCCTTCTTTGTTGACA	57.565	20	AGGGCCAATCCTTGATGCTA	58.775	20	119	Selenocompound metabolism	Metabolism of other amino acids
T01-03_TRINITY_DN4008_c0_g1_i10	1	(T)10	10	AGCTCCTCTTCTTTCCTCTTGT	58.753	22	ACAGCATATAACATAGCCTTGCA	58.282	23	119	Selenocompound metabolism	Metabolism of other amino acids
T01-03_TRINITY_DN4008_c0_g3_i6	1	(T)10	10	AGGGCCAATCCTTGATGCTA	58.775	20	AGTGGCCTTCTTTGTTGACA	57.565	20	119	Selenocompound metabolism	Metabolism of other amino acids
T01-03_TRINITY_DN4052_c0_g1_i5	1	(TC)8	16	TGGTGAGAGAACCAGCCATG	59.674	20	TTCGACGAGTGGTTCAAGGG	59.967	20	211	Cysteine and methionine metabolism; Tyrosine metabolism; Phenylalanine metabolism; Tryptophan metabolism; Phenylalanine, tyrosine and tryptophan biosynthesis; Novobiocin biosynthesis; Isoquinoline alkaloid biosynthesis; Tropane, piperidine and pyridine alkaloid biosynthesis; Glucosinolate biosynthesis; Ubiquinone and other terpenoid-quinone biosynthesis	Amino acid metabolism; Biosynthesis of other secondary metabolites; Metabolism of cofactors and vitamins
T01-03_TRINITY_DN4058_c0_g1_i3	1	(A)17	17	CATCACCTGGTGGGACTACC	59.458	20	AACTCTCGACTGCGATTAGC	57.804	20	108	Arginine and proline metabolism	Amino acid metabolism
T01-03_TRINITY_DN40598_c0_g1_i1	1	(A)10	10	CGAGTGGGCCGATTAGTTCA	59.825	20	AAGATGCCGTTATGCCAGGA	59.454	20	117	Oxidative phosphorylation; Photosynthesis; Purine metabolism; Pyrimidine metabolism	Energy metabolism; Nucleotide metabolism
T01-03_TRINITY_DN40748_c0_g1_i1	1	(TTC)5	15	GCAATGACGACAAGGTCTGC	59.833	20	ATGTACATGGGAACGCCGAG	60.179	20	103	Starch and sucrose metabolism	Carbohydrate metabolism
T01-03_TRINITY_DN408_c1_g2_i1	1	(AG)13	26	TCTCTCCCCGAGACCGATTC	60.466	20	CTGCGCCCATTGTTAGGTTG	59.829	20	194	Biosynthesis of unsaturated fatty acids	Lipid metabolism
T01-03_TRINITY_DN4090_c0_g1_i8	1	(A)14	14	GGCCCACACCACTTTATCCA	59.961	20	GTTGGCAAGAGGTTGAACACA	59.252	21	202	Nitrogen metabolism	Energy metabolism
T01-03_TRINITY_DN4106_c1_g3_i2	1	(GT)11(GA)8	38	TAGCTCACTTCCCTCCCTCC	60.032	20	ACACACACACACACACACCT	59.964	20	119	Thiamine metabolism	Metabolism of cofactors and vitamins
T01-03_TRINITY_DN4121_c1_g1_i1	1	(T)10	10	TCGAAACCGGATTGGGTCAC	60.321	20	TGCCAATCCTGATGTACACCA	59.367	21	116	Purine metabolism; Pyrimidine metabolism	Nucleotide metabolism
T01-03_TRINITY_DN4130_c2_g1_i4	1	(CTG)5	15	GAGAAGGATACCGCTCCAGC	59.967	20	AGCTCTGGTTCCAGCCAATC	60.035	20	182	Arachidonic acid metabolism	Lipid metabolism
T01-03_TRINITY_DN4147_c0_g1_i10	1	(A)10	10	AGCAGAGCGTGTTATCCTCA	58.814	20	GCCTGGGTAAATCAGCCTGT	60.034	20	195	Glycerolipid metabolism; Glycerophospholipid metabolism	Lipid metabolism
T01-03_TRINITY_DN4177_c0_g2_i1	1	(T)15	15	TGATGCGCTCTCTGCAGAAA	60.037	20	GGGTGCAAGTTGGTGGAGTA	59.89	20	215	Glycosaminoglycan degradation	Glycan biosynthesis and metabolism
T01-03_TRINITY_DN4177_c0_g2_i1	1	(A)10	10	ACCACTCCTCAAAGGACCCT	60.104	20	ACCACCAACCATTTGCTTGC	59.893	20	255	Glycosaminoglycan degradation	Glycan biosynthesis and metabolism
T01-03_TRINITY_DN4181_c1_g1_i1	1	(AC)6(TC)6	24	GCACTCCACTGAGACACACA	59.895	20	AAATGTGCTCGATGCCCTGA	60.035	20	163	Amino sugar and nucleotide sugar metabolism; Polyketide sugar unit biosynthesis	Carbohydrate metabolism; Metabolism of terpenoids and polyketides
T01-03_TRINITY_DN419_c1_g2_i1	1	(CT)7	14	TGGTATTGCCGTGGAAGTGA	59.312	20	CAAGACCAAGCTGAATGCCA	58.75	20	155	Purine metabolism; Pyrimidine metabolism; Drug metabolism - other enzymes	Nucleotide metabolism; Xenobiotics biodegradation and metabolism
T01-03_TRINITY_DN4206_c0_g1_i3	1	(A)11	11	TCGGTACTCACCTTTGCTCG	59.757	20	AGATTCTCAGGAACGCCACG	60.109	20	210	Glycosylphosphatidylinositol (GPI)-anchor biosynthesis	Glycan biosynthesis and metabolism
T01-03_TRINITY_DN4206_c0_g2_i2	1	(T)10	10	TTCTGGCTGCTTCGACTGAC	60.32	20	TGCCATAAGAATGAACCACCT	57.262	21	254	Glycosylphosphatidylinositol (GPI)-anchor biosynthesis	Glycan biosynthesis and metabolism
T01-03_TRINITY_DN42116_c0_g1_i13	1	(TTA)8(T)11	35	GCACGCTAAGGGGCAAAAC	60.081	19	TTCTCCCATTTGCGGAGTCC	60.035	20	128	Pyruvate metabolism; Glyoxylate and dicarboxylate metabolism; Propanoate metabolism; Carbon fixation in photosynthetic organisms; Carbon fixation pathways in prokaryotes; Fatty acid biosynthesis	Carbohydrate metabolism; Energy metabolism; Lipid metabolism
T01-03_TRINITY_DN4232_c0_g1_i6	1	(A)10	10	GGGGTCTCCACTGCAAAGAA	59.89	20	TTGCAAAGCTTCATGCCGTC	60.039	20	235	Steroid biosynthesis	Lipid metabolism
T01-03_TRINITY_DN424_c0_g1_i2	1	(T)16	16	GCTCCCAAAAGTTTGTGCGT	59.898	20	CTGCCCACACAACACACATG	59.969	20	235	Phenylalanine, tyrosine and tryptophan biosynthesis	Amino acid metabolism
T01-03_TRINITY_DN4242_c0_g1_i12	1	(A)14	14	ACGTCCTTGATGGGGTTTTT	57.625	20	ACTGATGGTCGACTTTGGCA	59.604	20	249	Oxidative phosphorylation	Energy metabolism
T01-03_TRINITY_DN4242_c1_g1_i2	1	(A)12	12	TCCACTGCTTTTTGACCTCCA	59.786	21	GGCTGCTTTTGTACAACCCAG	60	21	126	Arginine biosynthesis; Alanine, aspartate and glutamate metabolism; Cysteine and methionine metabolism; Arginine and proline metabolism; Tyrosine metabolism; Phenylalanine metabolism; Phenylalanine, tyrosine and tryptophan biosynthesis; Isoquinoline alkaloid biosynthesis; Tropane, piperidine and pyridine alkaloid biosynthesis; Carbon fixation in photosynthetic organisms	Amino acid metabolism; Biosynthesis of other secondary metabolites; Energy metabolism
T01-03_TRINITY_DN4242_c1_g1_i2	1	(CTTT)5	20	ACAGGTACCATGCAACTTAGGT	59.357	22	ACCCCATACCCAATTCCTGG	59.066	20	156	Arginine biosynthesis; Alanine, aspartate and glutamate metabolism; Cysteine and methionine metabolism; Arginine and proline metabolism; Tyrosine metabolism; Phenylalanine metabolism; Phenylalanine, tyrosine and tryptophan biosynthesis; Isoquinoline alkaloid biosynthesis; Tropane, piperidine and pyridine alkaloid biosynthesis; Carbon fixation in photosynthetic organisms	Amino acid metabolism; Biosynthesis of other secondary metabolites; Energy metabolism
T01-03_TRINITY_DN42556_c0_g1_i1	1	(AC)20	40	TGTCCCAACCCTTTGCCTTT	60.032	20	TGTGTGTGTGTGTGTGTGTG	59.129	20	168	Cysteine and methionine metabolism	Amino acid metabolism
T01-03_TRINITY_DN427_c0_g1_i13	1	(CT)8	16	GCCAACACCTCATCCCTTCA	59.962	20	GGGGGACTATTTTGGGTGGG	60.033	20	210	Fatty acid degradation; alpha-Linolenic acid metabolism; Biosynthesis of unsaturated fatty acids	Lipid metabolism
T01-03_TRINITY_DN427_c0_g1_i13	1	(CA)7	14	ACACACACATTCCCTTGGGG	60.179	20	ACAAACATTAGCCCCTCCTCT	58.721	21	133	Fatty acid degradation; alpha-Linolenic acid metabolism; Biosynthesis of unsaturated fatty acids	Lipid metabolism
T01-03_TRINITY_DN428_c2_g1_i4	1	(AC)8	16	CATGGTGTGGGTCGTAGCAA	60.321	20	TGTTTGTGTGTTTTGGGGCA	59.023	20	102	Fatty acid biosynthesis	Lipid metabolism
T01-03_TRINITY_DN4282_c0_g1_i6	1	(AT)7	14	CTGCGAACAACAGCAACCAA	59.9	20	ACCATCGATTTGCCCAAGCT	60.324	20	139	Glycosylphosphatidylinositol (GPI)-anchor biosynthesis	Glycan biosynthesis and metabolism
T01-03_TRINITY_DN4287_c0_g1_i2	1	(A)15	15	TCCTTCTCAGCTGACGTTTCC	59.999	21	GGTGGTGGTGGTGTGGTATT	59.888	20	101	Steroid biosynthesis	Lipid metabolism
[truncated: 16,003 more rows]

## Sheet: Table S6
Table S6. 100 pairs of EST-SSRs that were synthesized and polymorphically validated
[truncated: 101 more rows]
